# Supplementary material for: Comprehensive transcriptional analysis reveals salt stress-regulated key pathways, hub genes and time-specific response categories in common bermudagrass (Cynodon dactylon (L.) Pers.) roots
Source: Research Square preprint supplement (doi:10.21203/rs.3.rs-41836/v2), 2020-12-30
Supplement: Supplementary file 1 [file 58c88ab5f7f77e9d4e828d77.xlsx]

## Sheet: UP-REGELATED 
Genes	Gene Length	NR GI	NR ID	NR Score	NR Evalue	NR Description	NT GI	NT ID	NT Score	NT Evalue	NT Description	KO ID	KO Name	KO Description	Http Link	Swissprot ID	Swissprot Score	Swissprot Evalue	Swissprot Description	PFAM ID	PFAM description	Gene Ontology Biological Pathway	BP Description	Gene Ontology Molecular Function	MF Description	Gene Ontology Cellular Component	CC Description	KOG ID	KOG Description
Cluster-342212.138788	522	514819637	XP_004984513.1	472	1.8e-45	PREDICTED: uncharacterized protein LOC101778255 [Setaria italica]	514819636	XM_004984456.1	217	6.06e-108	PREDICTED: Setaria italica uncharacterized LOC101778255 (LOC101778255), mRNA	--	--	--	--	Q10M12	438	2.3e-42	Ricin B-like lectin R40C1 OS=Oryza sativa subsp. japonica GN=R40C1 PE=1 SV=1	--	--	--	--	--	--	--	--	--	--
Cluster-342212.139315	301	442803210	AGC78945.1	142	2e-07	hypothetical protein (mitochondrion) [Vicia faba]	944382884	EU234180.2	300	2.42e-154	Uncultured bacterium clone B47 16S ribosomal RNA gene, partial sequence	--	--	--	--	--	--	--	--	--	--	--	--	--	--	--	--	--	--
Cluster-342212.88456	1782	242085488	XP_002443169.1	1138	3.7e-122	hypothetical protein SORBIDRAFT_08g014070 [Sorghum bicolor]>gi|241943862|gb|EES17007.1| hypothetical protein SORBIDRAFT_08g014070 [Sorghum bicolor]	226497209	NM_001158616.1	450	0	Zea mays ABA-responsive protein (LOC100285725), mRNA >gi|195652522|gb|EU973611.1| Zea mays clone 402923 ABA-responsive protein mRNA, complete cds	--	--	--	--	Q9LYV6	738	1.3e-76	GEM-like protein 5 OS=Arabidopsis thaliana GN=At5g13200 PE=1 SV=1	--	--	--	--	--	--	--	--	--	--
Cluster-342212.242676	912	514765266	XP_004965711.1	244	8.8e-19	PREDICTED: uncharacterized protein LOC101774189 [Setaria italica]	514765265	XM_004965654.1	157	2.46e-74	PREDICTED: Setaria italica uncharacterized LOC101774189 (LOC101774189), mRNA	--	--	--	--	--	--	--	--	--	--	--	--	--	--	--	--	--	--
Cluster-342212.134135	714	514716079	XP_004953407.1	436	3.8e-41	PREDICTED: dehydrin COR410-like [Setaria italica]	532236396	KF022315.1	59	5.73e-20	Triticum aestivum dehydrin WZY1-2 mRNA, complete cds	--	--	--	--	P46524	268	1.6e-22	Dehydrin COR410 OS=Triticum aestivum GN=COR410 PE=2 SV=1	PF00257	Dehydrin	GO:0006950//GO:0009415	response to stress//response to water	--	--	--	--	--	--
Cluster-342212.243459	1193	514764205	XP_004965453.1	714	3.7e-73	PREDICTED: late embryogenesis abundant protein D-34-like [Setaria italica]	835963464	XM_004965396.2	436	0	PREDICTED: Setaria italica late embryogenesis abundant protein D-34-like (LOC101768389), mRNA	--	--	--	--	P09444	338	2.1e-30	Late embryogenesis abundant protein D-34 OS=Gossypium hirsutum PE=3 SV=1	--	--	--	--	--	--	--	--	--	--
Cluster-342212.80232	327	--	--	--	--	--	760259247	KP158806.1	308	9.47e-159	Uncultured bacterium clone brassicarhizosphere2_26151 16S ribosomal RNA gene, partial sequence	--	--	--	--	--	--	--	--	--	--	--	--	--	--	--	--	--	--
Cluster-342212.18985	1053	242042011	XP_002468400.1	431	2.1e-40	hypothetical protein SORBIDRAFT_01g045180 [Sorghum bicolor]>gi|241922254|gb|EER95398.1| hypothetical protein SORBIDRAFT_01g045180 [Sorghum bicolor]	751198483	KJ689791.1	197	1.66e-96	Eleusine coracana subsp. coracana isolate GPU-28 jasmonate ZIM domain protein mRNA, partial cds	--	--	--	--	Q8GRS2	399	1.5e-37	Protein TIFY 11c OS=Oryza sativa subsp. japonica GN=TIFY11C PE=1 SV=1	--	--	--	--	--	--	--	--	--	--
Cluster-342212.85687	688	226532662	NP_001146945.1	246	3.9e-19	late embryogenesis abundant protein, group 3 [Zea mays]>gi|195605580|gb|ACG24620.1| late embryogenesis abundant protein, group 3 [Zea mays]>gi|413946305|gb|AFW78954.1| lea protein group3 [Zea mays]	21207305	AY104227.1	151	3.97e-71	Zea mays PCO084365 mRNA sequence	--	--	--	--	Q42376	231	3e-18	Late embryogenesis abundant protein, group 3 OS=Zea mays GN=MGL3 PE=2 SV=1	PF01184	GPR1/FUN34/yaaH family	--	--	--	--	GO:0016021	integral component of membrane	--	--
Cluster-342212.8518	1087	--	--	--	--	--	--	--	--	--	--	--	--	--	--	--	--	--	--	PF01284	Membrane-associating domain	--	--	--	--	GO:0016020	membrane	--	--
Cluster-342212.198040	1448	670431816	XP_008656505.1	429	5e-40	PREDICTED: uncharacterized protein LOC103635905 isoform X1 [Zea mays]>gi|413950019|gb|AFW82668.1| hypothetical protein ZEAMMB73_769303 [Zea mays]	955716159	XM_004960379.3	242	2.22e-121	PREDICTED: Setaria italica uncharacterized LOC101774563 (LOC101774563), mRNA	--	--	--	--	--	--	--	--	--	--	--	--	--	--	--	--	--	--
Cluster-342212.198041	652	670445280	XP_008662940.1	340	4.7e-30	PREDICTED: uncharacterized protein LOC103641363 [Zea mays]>gi|413917619|gb|AFW57551.1| hypothetical protein ZEAMMB73_443619 [Zea mays]	955716159	XM_004960379.3	160	3.73e-76	PREDICTED: Setaria italica uncharacterized LOC101774563 (LOC101774563), mRNA	--	--	--	--	--	--	--	--	--	--	--	--	--	--	--	--	--	--
Cluster-342212.119907	4263	125557247	EAZ02783.1	2335	1.4e-260	hypothetical protein OsI_24908 [Oryza sativa Indica Group]	242047427	XM_002461415.1	606	0	Sorghum bicolor hypothetical protein, mRNA	--	--	--	--	Q9C8G5	1580	7.1e-174	CSC1-like protein ERD4 OS=Arabidopsis thaliana GN=ERD4 PE=2 SV=1	PF02714	Calcium-dependent channel, 7TM region, putative phosphate	--	--	--	--	GO:0016020	membrane	KOG1134	Uncharacterized conserved protein
Cluster-342212.198043	756	242086831	XP_002439248.1	474	1.6e-45	hypothetical protein SORBIDRAFT_09g003120 [Sorghum bicolor]>gi|241944533|gb|EES17678.1| hypothetical protein SORBIDRAFT_09g003120 [Sorghum bicolor]	955716159	XM_004960379.3	184	1.98e-89	PREDICTED: Setaria italica uncharacterized LOC101774563 (LOC101774563), mRNA	--	--	--	--	--	--	--	--	PF06682	SOCE-associated regulatory factor of calcium homoeostasis	GO:2001256	regulation of store-operated calcium entry	--	--	GO:0030176	integral component of endoplasmic reticulum membrane	--	--
Cluster-342212.43725	640	573925957	XP_006650516.1	336	1.3e-29	PREDICTED: uncharacterized protein LOC102720220 [Oryza brachyantha]	242038304	XM_002466502.1	156	6.12e-74	Sorghum bicolor hypothetical protein, mRNA	--	--	--	--	--	--	--	--	--	--	--	--	--	--	--	--	--	--
Cluster-342212.71602	1890	--	--	--	--	--	1002281484	XM_015789552.1	38	7.38e-08	PREDICTED: Oryza sativa Japonica Group uncharacterized LOC4342291 (LOC4342291), transcript variant X5, mRNA	--	--	--	--	--	--	--	--	--	--	--	--	--	--	--	--	--	--
Cluster-342212.246796	1261	514812317	XP_004980953.1	620	3.1e-62	PREDICTED: uncharacterized protein LOC101784294 [Setaria italica]	961441431	NM_001317828.1	304	6.6e-156	Zea mays plasma membrane associated protein (pco126369), mRNA	--	--	--	--	--	--	--	--	--	--	--	--	--	--	--	--	--	--
Cluster-342212.14039	1137	--	--	--	--	--	242081610	XM_002445529.1	86	9.1e-35	Sorghum bicolor hypothetical protein, mRNA	--	--	--	--	--	--	--	--	--	--	--	--	--	--	--	--	--	--
Cluster-342212.240252	909	--	--	--	--	--	367037220	XM_003648943.1	118	1.18e-52	Thielavia terrestris NRRL 8126 hypothetical protein (THITE_2107085) mRNA, complete cds	--	--	--	--	P22151	290	5.8e-25	Glucose-repressible gene protein OS=Neurospora crassa (strain ATCC 24698 / 74-OR23-1A / CBS 708.71 / DSM 1257 / FGSC 987) GN=grg-1 PE=2 SV=1	--	--	--	--	--	--	--	--	--	--
Cluster-342212.13156	664	242064982	XP_002453780.1	229	3.5e-17	hypothetical protein SORBIDRAFT_04g016960 [Sorghum bicolor]>gi|241933611|gb|EES06756.1| hypothetical protein SORBIDRAFT_04g016960 [Sorghum bicolor]	--	--	--	--	--	--	--	--	--	--	--	--	--	--	--	--	--	--	--	--	--	--	--
Cluster-342212.14024	1436	--	--	--	--	--	--	--	--	--	--	--	--	--	--	--	--	--	--	PF06687//PF15686	SUR7/PalI family//Lysine-rich CEACAM1 co-isolated protein family	GO:0043123//GO:0043066//GO:0045766	positive regulation of I-kappaB kinase/NF-kappaB signaling//negative regulation of apoptotic process//positive regulation of angiogenesis	--	--	GO:0005886	plasma membrane	--	--
Cluster-342212.241430	939	226499722	NP_001144158.1	261	9.7e-21	uncharacterized protein LOC100277012 [Zea mays]>gi|195637716|gb|ACG38326.1| hypothetical protein [Zea mays]	226499721	NM_001150686.1	98	1.59e-41	Zea mays uncharacterized LOC100277012 (LOC100277012), mRNA >gi|195637715|gb|EU966208.1| Zea mays clone 292594 hypothetical protein mRNA, complete cds	--	--	--	--	--	--	--	--	--	--	--	--	--	--	--	--	--	--
Cluster-342212.241431	1144	514744707	XP_004960701.1	278	1.3e-22	PREDICTED: atherin-like [Setaria italica]	960489116	XM_003576883.3	47	4.38e-13	PREDICTED: Brachypodium distachyon translation initiation factor IF-2-like (LOC100843499), mRNA	--	--	--	--	--	--	--	--	--	--	--	--	--	--	--	--	--	--
Cluster-342212.188395	2091	242056503	XP_002457397.1	418	1.4e-38	hypothetical protein SORBIDRAFT_03g006690 [Sorghum bicolor]>gi|241929372|gb|EES02517.1| hypothetical protein SORBIDRAFT_03g006690 [Sorghum bicolor]	514775081	XM_004968087.1	163	2.66e-77	PREDICTED: Setaria italica uncharacterized LOC101755156 (LOC101755156), mRNA	--	--	--	--	--	--	--	--	--	--	--	--	--	--	--	--	--	--
Cluster-76164.0	921	--	--	--	--	--	--	--	--	--	--	--	--	--	--	--	--	--	--	--	--	--	--	--	--	--	--	--	--
Cluster-342212.141322	1008	162414848	ABX89061.1	444	6.3e-42	pathogenesis-related protein [Triticum aestivum]	754297623	KP284557.1	292	2.46e-149	Saccharum arundinaceum PR10 (PR10) gene, complete cds	--	--	--	--	Q05736	290	6.4e-25	Pathogenesis-related protein 1 OS=Asparagus officinalis GN=PR1 PE=2 SV=1	PF00407	Pathogenesis-related protein Bet v I family	GO:0009607//GO:0006952	response to biotic stimulus//defense response	--	--	--	--	--	--
Cluster-342212.116171	1410	514760298	XP_004964505.1	368	5.7e-33	PREDICTED: early nodulin-93-like [Setaria italica]	514760297	XM_004964448.1	208	1.72e-102	PREDICTED: Setaria italica early nodulin-93-like (LOC101785909), mRNA	--	--	--	--	Q02921	170	7.4e-11	Early nodulin-93 OS=Glycine max PE=2 SV=1	--	--	--	--	--	--	--	--	--	--
Cluster-61270.0	1080	545354843	XP_005643253.1	191	1.5e-12	hypothetical protein COCSUDRAFT_45184 [Coccomyxa subellipsoidea C-169]>gi|384245214|gb|EIE18709.1| hypothetical protein COCSUDRAFT_45184 [Coccomyxa subellipsoidea C-169]	--	--	--	--	--	--	--	--	--	--	--	--	--	PF00257//PF05510	Dehydrin//Sarcoglycan alpha/epsilon	GO:0006950//GO:0009415	response to stress//response to water	--	--	GO:0016012	sarcoglycan complex	--	--
Cluster-342212.164440	2262	--	--	--	--	--	1002281484	XM_015789552.1	37	3.19e-07	PREDICTED: Oryza sativa Japonica Group uncharacterized LOC4342291 (LOC4342291), transcript variant X5, mRNA	--	--	--	--	--	--	--	--	--	--	--	--	--	--	--	--	--	--
Cluster-342212.141317	934	514820433	XP_004984905.1	731	3.1e-75	PREDICTED: pathogenesis-related protein 1-like [Setaria italica]	955724529	XM_004984848.3	330	1.71e-170	PREDICTED: Setaria italica pathogenesis-related protein 1-like (LOC101758786), mRNA	--	--	--	--	Q05736	438	4.1e-42	Pathogenesis-related protein 1 OS=Asparagus officinalis GN=PR1 PE=2 SV=1	PF00407	Pathogenesis-related protein Bet v I family	GO:0006952//GO:0009607	defense response//response to biotic stimulus	--	--	--	--	--	--
Cluster-342212.76066	3605	514784376	XP_004970576.1	479	2e-45	PREDICTED: lipid transfer-like protein VAS [Setaria italica]	242059238	XM_002458720.1	240	7.26e-120	Sorghum bicolor hypothetical protein, mRNA	--	--	--	--	--	--	--	--	--	--	--	--	--	--	--	--	--	--
Cluster-342212.45635	1322	670405854	XP_008644548.1	304	1.4e-25	PREDICTED: uncharacterized protein LOC103625926 [Zea mays]>gi|413933220|gb|AFW67771.1| hypothetical protein ZEAMMB73_462092 [Zea mays]	--	--	--	--	--	--	--	--	--	--	--	--	--	--	--	--	--	--	--	--	--	--	--
Cluster-342212.95819	1172	--	--	--	--	--	--	--	--	--	--	--	--	--	--	--	--	--	--	PF02932	Neurotransmitter-gated ion-channel transmembrane region	GO:0006811	ion transport	--	--	GO:0016020	membrane	--	--
Cluster-342212.143351	322	147770482	CAN62678.1	210	2.7e-15	hypothetical protein VITISV_012000 [Vitis vinifera]	226098534	AB494288.1	245	9.78e-124	Uncultured bacterium gene for 16S rRNA, partial sequence, clone: SB28	--	--	--	--	--	--	--	--	--	--	--	--	--	--	--	--	--	--
Cluster-342212.88461	2371	514752831	XP_004962656.1	722	8.6e-74	PREDICTED: GEM-like protein 5 [Setaria italica]	77817068	DQ244392.1	301	5.85e-154	Zea mays clone 6860 mRNA sequence	--	--	--	--	Q9LYV6	540	1.6e-53	GEM-like protein 5 OS=Arabidopsis thaliana GN=At5g13200 PE=1 SV=1	--	--	--	--	--	--	--	--	--	--
Cluster-342212.140923	788	674887096	CDY45505.1	274	2.5e-22	BnaCnng12640D [Brassica napus]	635597072	AP014569.1	555	0	Comamonadaceae bacterium B1 DNA, complete genome	--	--	--	--	--	--	--	--	--	--	--	--	--	--	--	--	--	--
Cluster-342212.246794	1215	514812317	XP_004980953.1	620	3e-62	PREDICTED: uncharacterized protein LOC101784294 [Setaria italica]	961441431	NM_001317828.1	304	6.35e-156	Zea mays plasma membrane associated protein (pco126369), mRNA	--	--	--	--	--	--	--	--	--	--	--	--	--	--	--	--	--	--
Cluster-342212.240956	2312	514820374	XP_004984876.1	606	2.4e-60	PREDICTED: circumsporozoite protein-like [Setaria italica]	--	--	--	--	--	--	--	--	--	--	--	--	--	--	--	--	--	--	--	--	--	--	--
Cluster-30037.0	1062	514773258	XP_004967694.1	141	9.1e-07	PREDICTED: embryonic protein DC-8-like [Setaria italica]	721633873	XM_003565604.2	51	2.42e-15	PREDICTED: Brachypodium distachyon embryonic protein DC-8-like (LOC100832432), mRNA	--	--	--	--	--	--	--	--	PF01304	Gas vesicles protein GVPc repeated domain	GO:0031412	gas vesicle organization	--	--	GO:0031411	gas vesicle	--	--
Cluster-342212.147926	1123	835980720	XP_004968835.2	623	1.2e-62	PREDICTED: universal stress protein A-like protein isoform X2 [Setaria italica]	835980719	XM_004968778.2	273	1e-138	PREDICTED: Setaria italica universal stress protein A-like protein (LOC101765033), transcript variant X2, mRNA	--	--	--	--	Q8LGG8	189	3.7e-13	Universal stress protein A-like protein OS=Arabidopsis thaliana GN=At3g01520 PE=1 SV=2	PF00582	Universal stress protein family	GO:0006950	response to stress	--	--	--	--	--	--
Cluster-342212.229743	907	514715850	XP_004953350.1	430	2.4e-40	PREDICTED: uncharacterized protein LOC101753554 [Setaria italica]	835912754	XM_004953293.2	84	9.32e-34	PREDICTED: Setaria italica uncharacterized LOC101753554 (LOC101753554), mRNA	--	--	--	--	--	--	--	--	--	--	--	--	--	--	--	--	--	--
Cluster-342212.212500	1043	--	--	--	--	--	670370680	XM_008668356.1	59	8.5e-20	PREDICTED: Zea mays hyphally-regulated protein-like (LOC103645275), mRNA	--	--	--	--	--	--	--	--	--	--	--	--	--	--	--	--	--	--
Cluster-342212.14038	1206	--	--	--	--	--	242081610	XM_002445529.1	179	1.94e-86	Sorghum bicolor hypothetical protein, mRNA	--	--	--	--	--	--	--	--	--	--	--	--	--	--	--	--	--	--
Cluster-342212.72590	865	514747240	XP_004961318.1	416	9.5e-39	PREDICTED: non-specific lipid-transfer protein 2-like [Setaria italica]	835947312	XM_004961261.2	179	1.37e-86	PREDICTED: Setaria italica non-specific lipid-transfer protein 2-like (LOC101779829), mRNA	--	--	--	--	Q43681	227	1.1e-17	Probable non-specific lipid-transfer protein AKCS9 OS=Vigna unguiculata PE=2 SV=1	--	--	--	--	--	--	--	--	--	--
Cluster-342212.136611	768	--	--	--	--	--	1002281484	XM_015789552.1	37	1.05e-07	PREDICTED: Oryza sativa Japonica Group uncharacterized LOC4342291 (LOC4342291), transcript variant X5, mRNA	--	--	--	--	--	--	--	--	--	--	--	--	--	--	--	--	--	--
Cluster-342212.38682	925	--	--	--	--	--	670370680	XM_008668356.1	53	1.63e-16	PREDICTED: Zea mays hyphally-regulated protein-like (LOC103645275), mRNA	--	--	--	--	--	--	--	--	PF05887	Procyclic acidic repetitive protein (PARP)	--	--	--	--	GO:0016020	membrane	--	--
Cluster-342212.130630	1585	514760590	XP_004964578.1	279	1.3e-22	PREDICTED: uncharacterized protein LOC101780271 [Setaria italica]	835957269	XM_004964521.2	196	9.08e-96	PREDICTED: Setaria italica uncharacterized LOC101780271 (LOC101780271), mRNA	--	--	--	--	--	--	--	--	--	--	--	--	--	--	--	--	--	--
Cluster-342212.147928	1950	835980715	XP_012701788.1	320	2.9e-27	PREDICTED: universal stress protein A-like protein isoform X1 [Setaria italica]	253761264	XM_002489026.1	53	3.49e-16	Sorghum bicolor hypothetical protein (SORBIDRAFT_0139s002020) mRNA, complete cds	--	--	--	--	--	--	--	--	PF00582	Universal stress protein family	GO:0006950	response to stress	--	--	--	--	--	--
Cluster-342212.70074	1161	720045400	XP_010270196.1	262	9.2e-21	PREDICTED: CASP-like protein 2B1 [Nelumbo nucifera]	259490274	NM_001165541.1	175	3.11e-84	Zea mays membrane protein (LOC100304008), mRNA >gi|195628827|gb|EU964113.1| Zea mays clone 275968 membrane protein mRNA, complete cds	--	--	--	--	C5YP66	246	9.4e-20	CASP-like protein 2U1 OS=Sorghum bicolor GN=Sb08g016550 PE=2 SV=1	--	--	--	--	--	--	--	--	--	--
Cluster-342212.19967	381	514818981	XP_004984190.1	136	1.2e-06	PREDICTED: uncharacterized WD repeat-containing protein C2A9.03-like isoform X1 [Setaria italica]	--	--	--	--	--	--	--	--	--	--	--	--	--	--	--	--	--	--	--	--	--	--	--
Cluster-342212.46984	211	--	--	--	--	--	407894523	CP003872.1	119	6.65e-54	Acidovorax sp. KKS102, complete genome	--	--	--	--	--	--	--	--	--	--	--	--	--	--	--	--	--	--
Cluster-342212.61342	1049	--	--	--	--	--	--	--	--	--	--	--	--	--	--	--	--	--	--	--	--	--	--	--	--	--	--	--	--
Cluster-342212.126500	491	--	--	--	--	--	--	--	--	--	--	--	--	--	--	--	--	--	--	--	--	--	--	--	--	--	--	--	--
Cluster-342212.150669	1024	--	--	--	--	--	--	--	--	--	--	--	--	--	--	--	--	--	--	--	--	--	--	--	--	--	--	--	--
Cluster-342212.75848	1477	242039273	XP_002467031.1	617	8e-62	hypothetical protein SORBIDRAFT_01g018550 [Sorghum bicolor]>gi|241920885|gb|EER94029.1| hypothetical protein SORBIDRAFT_01g018550 [Sorghum bicolor]	195614567	EU956996.1	288	6.09e-147	Zea mays clone 1579828 hypothetical protein mRNA, complete cds	--	--	--	--	Q9ZVD2	229	1.1e-17	NDR1/HIN1-like protein 13 OS=Arabidopsis thaliana GN=NHL13 PE=2 SV=1	--	--	--	--	--	--	--	--	--	--
Cluster-342212.15121	358	--	--	--	--	--	826168461	CP011371.1	248	2.36e-125	[Polyangium] brachysporum strain DSM 7029, complete genome	--	--	--	--	--	--	--	--	--	--	--	--	--	--	--	--	--	--
Cluster-342212.13551	832	514801810	XP_004975804.1	154	2.2e-08	PREDICTED: uncharacterized protein LOC101757629 [Setaria italica]	242073301	XM_002446542.1	65	3.11e-23	Sorghum bicolor hypothetical protein, mRNA	--	--	--	--	--	--	--	--	--	--	--	--	--	--	--	--	--	--
Cluster-342212.228212	1727	514709060	XP_004951693.1	1744	1.9e-192	PREDICTED: uncharacterized protein LOC101759763 [Setaria italica]	514709059	XM_004951636.1	643	0	PREDICTED: Setaria italica uncharacterized LOC101759763 (LOC101759763), mRNA	--	--	--	--	Q5UNY4	515	9e-51	Uncharacterized protein L728 OS=Acanthamoeba polyphaga mimivirus GN=MIMI_L728 PE=4 SV=1	--	--	--	--	--	--	--	--	--	--
Cluster-342212.200898	654	--	--	--	--	--	288300159	FJ972827.1	140	4.91e-65	Cleistogenes songorica dehydrin-/LEA group 2-like protein mRNA, complete cds	--	--	--	--	--	--	--	--	PF00257	Dehydrin	GO:0006950//GO:0009415	response to stress//response to water	--	--	--	--	--	--
Cluster-342212.92677	2479	514797981	XP_004973936.1	847	2.9e-88	PREDICTED: cytochrome b561 and DOMON domain-containing protein At3g25290-like [Setaria italica]	835995530	XM_004973879.2	363	0	PREDICTED: Setaria italica cytochrome b561 and DOMON domain-containing protein At3g25290-like (LOC101771141), mRNA	--	--	--	--	Q9LSE7	598	3.1e-60	Cytochrome b561 and DOMON domain-containing protein At3g25290 OS=Arabidopsis thaliana GN=At3g25290 PE=2 SV=1	PF00033//PF03188	Cytochrome b/b6/petB//Eukaryotic cytochrome b561	GO:0022904	respiratory electron transport chain	--	--	GO:0016021//GO:0016020	integral component of membrane//membrane	--	--
Cluster-342212.98674	1108	835921157	XP_012698772.1	136	3.6e-06	PREDICTED: keratin-associated protein 6-2-like [Setaria italica]	--	--	--	--	--	--	--	--	--	--	--	--	--	PF04537	Herpesvirus UL55 protein	GO:0019058	viral life cycle	--	--	--	--	--	--
Cluster-342212.65630	666	--	--	--	--	--	288300159	FJ972827.1	104	5.14e-45	Cleistogenes songorica dehydrin-/LEA group 2-like protein mRNA, complete cds	--	--	--	--	--	--	--	--	PF00257	Dehydrin	GO:0009415//GO:0006950	response to water//response to stress	--	--	--	--	--	--
Cluster-342212.32181	660	242036063	XP_002465426.1	265	2.4e-21	hypothetical protein SORBIDRAFT_01g038670 [Sorghum bicolor]>gi|241919280|gb|EER92424.1| hypothetical protein SORBIDRAFT_01g038670 [Sorghum bicolor]	242036062	XM_002465381.1	119	2.34e-53	Sorghum bicolor hypothetical protein, mRNA	--	--	--	--	Q9ARD5	228	6.5e-18	Low temperature-induced protein lt101.2 OS=Hordeum vulgare GN=LT101.2 PE=2 SV=1	PF01679	Proteolipid membrane potential modulator	--	--	--	--	GO:0016021	integral component of membrane	KOG1773	Stress responsive protein
Cluster-342212.32184	849	629092691	KCW58686.1	156	1.3e-08	hypothetical protein EUGRSUZ_H01335 [Eucalyptus grandis]	28207192	AY177891.1	72	4.08e-27	Sorghum bicolor clone BAC 8070 ABA-induced gene, partial sequence	--	--	--	--	--	--	--	--	PF01679	Proteolipid membrane potential modulator	--	--	--	--	GO:0016021	integral component of membrane	--	--
Cluster-342212.1413	850	514812317	XP_004980953.1	684	7.9e-70	PREDICTED: uncharacterized protein LOC101784294 [Setaria italica]	514812316	XM_004980896.1	297	3.42e-152	PREDICTED: Setaria italica uncharacterized LOC101784294 (LOC101784294), mRNA	--	--	--	--	--	--	--	--	--	--	--	--	--	--	--	--	--	--
Cluster-342212.116168	1438	514760298	XP_004964505.1	379	3.1e-34	PREDICTED: early nodulin-93-like [Setaria italica]	--	--	--	--	--	--	--	--	--	Q02921	170	7.5e-11	Early nodulin-93 OS=Glycine max PE=2 SV=1	--	--	--	--	--	--	--	--	--	--
Cluster-134298.0	1625	--	--	--	--	--	--	--	--	--	--	--	--	--	--	--	--	--	--	--	--	--	--	--	--	--	--	--	--
Cluster-342212.208771	2470	836029195	XP_012698460.1	873	2.8e-91	PREDICTED: uncharacterized WD repeat-containing protein C2A9.03-like isoform X2 [Setaria italica]	--	--	--	--	--	--	--	--	--	--	--	--	--	--	--	--	--	--	--	--	--	--	--
Cluster-342212.198042	938	670445280	XP_008662940.1	344	2.3e-30	PREDICTED: uncharacterized protein LOC103641363 [Zea mays]>gi|413917619|gb|AFW57551.1| hypothetical protein ZEAMMB73_443619 [Zea mays]	--	--	--	--	--	--	--	--	--	--	--	--	--	--	--	--	--	--	--	--	--	--	--
Cluster-342212.91622	2085	514822452	XP_004985890.1	1998	8.3e-222	PREDICTED: CBL-interacting protein kinase 9 [Setaria italica]	955725232	XM_004985833.3	861	0	PREDICTED: Setaria italica CBL-interacting protein kinase 9 (LOC101765549), mRNA	--	--	--	--	Q10SC8	1949	5.6e-217	CBL-interacting protein kinase 9 OS=Oryza sativa subsp. japonica GN=CIPK9 PE=2 SV=1	PF04153//PF08015//PF07714//PF03822//PF06293//PF00069	NOT2 / NOT3 / NOT5 family//Fungal mating-type pheromone//Protein tyrosine kinase//NAF domain//Lipopolysaccharide kinase (Kdo/WaaP) family//Protein kinase domain	GO:0006468//GO:0006355//GO:0007165	protein phosphorylation//regulation of transcription, DNA-templated//signal transduction	GO:0000772//GO:0016773//GO:0005524//GO:0004672	mating pheromone activity//phosphotransferase activity, alcohol group as acceptor//ATP binding//protein kinase activity	GO:0005634//GO:0016020	nucleus//membrane	--	--
Cluster-342212.167196	3373	413938012	AFW72563.1	569	6.7e-56	putative homeobox DNA-binding and leucine zipper domain family protein [Zea mays]>gi|645169026|gb|AIB06019.1| HB transcription factor, partial [Zea mays]	--	--	--	--	--	--	--	--	--	A2X7U1	551	1.2e-54	Homeobox-leucine zipper protein HOX24 OS=Oryza sativa subsp. indica GN=HOX24 PE=2 SV=2	PF07544//PF02183//PF04218//PF04871//PF04111//PF06156//PF10186//PF08287//PF10473//PF01025//PF04977//PF04632//PF07716//PF01920//PF06657//PF00046//PF05920//PF06005	RNA polymerase II transcription mediator complex subunit 9//Homeobox associated leucine zipper//CENP-B N-terminal DNA-binding domain//Uso1 / p115 like vesicle tethering protein, C terminal region//Autophagy protein Apg6//Protein of unknown function (DUF972)//Vacuolar sorting 38 and autophagy-related subunit 14//Spc19//Leucine-rich repeats of kinetochore protein Cenp-F/LEK1//GrpE//Septum formation…	GO:0006914//GO:0010508//GO:0006457//GO:0043093//GO:0006810//GO:0006886//GO:0006357//GO:0000917//GO:0008608//GO:0015031//GO:0006260//GO:0006355//GO:0007049	autophagy//positive regulation of autophagy//protein folding//FtsZ-dependent cytokinesis//transport//intracellular protein transport//regulation of transcription from RNA polymerase II promoter//barrier septum assembly//attachment of spindle microtubules to kinetochore//protein transport//DNA replication//regulation of transcription, DNA-templated//cell cycle	GO:0000774//GO:0042803//GO:0008134//GO:0001104//GO:0008017//GO:0045502//GO:0008565//GO:0051082//GO:0043565//GO:0003700//GO:0003677//GO:0051087	adenyl-nucleotide exchange factor activity//protein homodimerization activity//transcription factor binding//RNA polymerase II transcription cofactor activity//microtubule binding//dynein binding//protein transporter activity//unfolded protein binding//sequence-specific DNA binding//transcription factor activity, sequence-specific DNA binding//DNA binding//chaperone binding	GO:0045298//GO:0030286//GO:0005667//GO:0016020//GO:0005876//GO:0042729//GO:0016272//GO:0016592//GO:0005886//GO:0005737	tubulin complex//dynein complex//transcription factor complex//membrane//spindle microtubule//DASH complex//prefoldin complex//mediator complex//plasma membrane//cytoplasm	--	--
Cluster-342212.4891	823	4105109	AAD02256.1	297	5.7e-25	dehydrin 4 [Hordeum vulgare subsp. vulgare]	121489504	AM180925.1	44	1.45e-11	Aegilops umbellulata mRNA for dehydrin 1 (dhn1 gene)	--	--	--	--	P12949	278	1.3e-23	Dehydrin DHN4 OS=Hordeum vulgare GN=DHN4 PE=2 SV=1	PF11593//PF00257	Mediator complex subunit 3 fungal//Dehydrin	GO:0009415//GO:0006357//GO:0006950	response to water//regulation of transcription from RNA polymerase II promoter//response to stress	GO:0001104	RNA polymerase II transcription cofactor activity	GO:0016592	mediator complex	KOG3544	Collagens (type IV and type XIII), and related proteins
Cluster-342212.98972	2587	514808000	XP_004978848.1	1345	5.4e-146	PREDICTED: LOW QUALITY PROTEIN: ABC transporter G family member 25-like [Setaria italica]	242070276	XM_002450370.1	493	0	Sorghum bicolor hypothetical protein, mRNA	--	--	--	--	Q84TH5	803	5.4e-84	ABC transporter G family member 25 OS=Arabidopsis thaliana GN=ABCG25 PE=2 SV=1	PF04988//PF01061	A-kinase anchoring protein 95 (AKAP95)//ABC-2 type transporter	--	--	GO:0003677	DNA binding	GO:0005634//GO:0016020	nucleus//membrane	KOG0061	Transporter, ABC superfamily (Breast cancer resistance protein)
Cluster-342212.15172	703	--	--	--	--	--	--	--	--	--	--	--	--	--	--	--	--	--	--	PF02178	AT hook motif	--	--	GO:0003677	DNA binding	--	--	--	--
Cluster-342212.15171	773	--	--	--	--	--	--	--	--	--	--	--	--	--	--	--	--	--	--	PF02178	AT hook motif	--	--	GO:0003677	DNA binding	--	--	--	--
Cluster-342212.220693	1635	514801919	XP_004975858.1	1219	1.4e-131	PREDICTED: NAC domain-containing protein 100-like isoform X2 [Setaria italica]	955721856	XM_004975800.3	438	0	PREDICTED: Setaria italica NAC domain-containing protein 92-like (LOC101778459), transcript variant X1, mRNA	--	--	--	--	Q9FLJ2	685	1.6e-70	NAC domain-containing protein 100 OS=Arabidopsis thaliana GN=NAC100 PE=2 SV=1	PF02365	No apical meristem (NAM) protein	GO:0006355	regulation of transcription, DNA-templated	GO:0003677	DNA binding	--	--	--	--
Cluster-342212.49773	1659	413938012	AFW72563.1	468	1.7e-44	putative homeobox DNA-binding and leucine zipper domain family protein [Zea mays]>gi|645169026|gb|AIB06019.1| HB transcription factor, partial [Zea mays]	--	--	--	--	--	--	--	--	--	A2X7U1	442	2.5e-42	Homeobox-leucine zipper protein HOX24 OS=Oryza sativa subsp. indica GN=HOX24 PE=2 SV=2	PF06005//PF05920//PF04632//PF04977//PF00046//PF07716//PF01920//PF04111//PF07544//PF02183//PF04871//PF04218	Protein of unknown function (DUF904)//Homeobox KN domain//Fusaric acid resistance protein family//Septum formation initiator//Homeobox domain//Basic region leucine zipper//Prefoldin subunit//Autophagy protein Apg6//RNA polymerase II transcription mediator complex subunit 9//Homeobox associated leucine zipper//Uso1 / p115 like vesicle tethering protein, C terminal region//CENP-B N-terminal DNA-bin…	GO:0007049//GO:0006357//GO:0006886//GO:0006355//GO:0015031//GO:0006810//GO:0043093//GO:0000917//GO:0006457//GO:0006914	cell cycle//regulation of transcription from RNA polymerase II promoter//intracellular protein transport//regulation of transcription, DNA-templated//protein transport//transport//FtsZ-dependent cytokinesis//barrier septum assembly//protein folding//autophagy	GO:0003677//GO:0003700//GO:0001104//GO:0043565//GO:0051082//GO:0008565	DNA binding//transcription factor activity, sequence-specific DNA binding//RNA polymerase II transcription cofactor activity//sequence-specific DNA binding//unfolded protein binding//protein transporter activity	GO:0005737//GO:0005886//GO:0016592//GO:0016020//GO:0005667//GO:0016272	cytoplasm//plasma membrane//mediator complex//membrane//transcription factor complex//prefoldin complex	--	--
Cluster-342212.167197	3408	413938012	AFW72563.1	452	2.5e-42	putative homeobox DNA-binding and leucine zipper domain family protein [Zea mays]>gi|645169026|gb|AIB06019.1| HB transcription factor, partial [Zea mays]	--	--	--	--	--	--	--	--	--	Q6H6S3	412	1.6e-38	Homeobox-leucine zipper protein HOX24 OS=Oryza sativa subsp. japonica GN=HOX24 PE=2 SV=1	PF04218//PF02183//PF13443//PF08172//PF07716//PF00046//PF01527//PF05920	CENP-B N-terminal DNA-binding domain//Homeobox associated leucine zipper//Cro/C1-type HTH DNA-binding domain//CASP C terminal//Basic region leucine zipper//Homeobox domain//Transposase//Homeobox KN domain	GO:0006355//GO:0006891//GO:0006313	regulation of transcription, DNA-templated//intra-Golgi vesicle-mediated transport//transposition, DNA-mediated	GO:0003677//GO:0003700//GO:0004803//GO:0043565	DNA binding//transcription factor activity, sequence-specific DNA binding//transposase activity//sequence-specific DNA binding	GO:0005667//GO:0030173	transcription factor complex//integral component of Golgi membrane	--	--
Cluster-342212.189974	1922	242073868	XP_002446870.1	437	7.8e-41	hypothetical protein SORBIDRAFT_06g024000 [Sorghum bicolor]>gi|241938053|gb|EES11198.1| hypothetical protein SORBIDRAFT_06g024000 [Sorghum bicolor]	835998253	XM_004976347.2	242	2.97e-121	PREDICTED: Setaria italica homeobox-leucine zipper protein HOX22-like (LOC101784648), mRNA	--	--	--	--	Q7XUJ5	436	1.4e-41	Homeobox-leucine zipper protein HOX22 OS=Oryza sativa subsp. japonica GN=HOX22 PE=2 SV=2	PF13411//PF00046//PF04977//PF01527//PF05920//PF04218//PF02183//PF07716	MerR HTH family regulatory protein//Homeobox domain//Septum formation initiator//Transposase//Homeobox KN domain//CENP-B N-terminal DNA-binding domain//Homeobox associated leucine zipper//Basic region leucine zipper	GO:0007049//GO:0006355//GO:0006313	cell cycle//regulation of transcription, DNA-templated//transposition, DNA-mediated	GO:0003677//GO:0003700//GO:0004803//GO:0043565//GO:0000976	DNA binding//transcription factor activity, sequence-specific DNA binding//transposase activity//sequence-specific DNA binding//transcription regulatory region sequence-specific DNA binding	GO:0005667//GO:0005634	transcription factor complex//nucleus	--	--
Cluster-231897.0	1445	255589617	XP_002535025.1	224	2.9e-16	Outer membrane porin protein 32 precursor, putative [Ricinus communis]>gi|223524175|gb|EEF27359.1| Outer membrane porin protein 32 precursor, putative [Ricinus communis]	971166764	CP013729.1	48	1.55e-13	Roseateles depolymerans strain KCTC 42856, complete genome	--	--	--	--	P24305	286	2.7e-24	Outer membrane porin protein 32 OS=Delftia acidovorans GN=omp32 PE=1 SV=1	PF00267//PF01367//PF02371//PF00633	Gram-negative porin//5'-3' exonuclease, C-terminal SAM fold//Transposase IS116/IS110/IS902 family//Helix-hairpin-helix motif	GO:0006313//GO:0006810	transposition, DNA-mediated//transport	GO:0003677//GO:0003824//GO:0015288//GO:0004803	DNA binding//catalytic activity//porin activity//transposase activity	GO:0016020	membrane	--	--
Cluster-342212.54872	1277	514716382	XP_004953481.1	539	7.7e-53	PREDICTED: RING-H2 finger protein ATL8-like [Setaria italica]	835906384	XM_004953424.2	273	1.14e-138	PREDICTED: Setaria italica RING-H2 finger protein ATL8-like (LOC101770589), mRNA	--	--	--	--	Q8LC69	313	1.8e-27	RING-H2 finger protein ATL8 OS=Arabidopsis thaliana GN=ATL8 PE=2 SV=2	PF13912//PF00628//PF13639//PF00097//PF14634//PF00538//PF12861//PF17123//PF12678	C2H2-type zinc finger//PHD-finger//Ring finger domain//Zinc finger, C3HC4 type (RING finger)//zinc-RING finger domain//linker histone H1 and H5 family//Anaphase-promoting complex subunit 11 RING-H2 finger//RING-like zinc finger//RING-H2 zinc finger	GO:0016567//GO:0006334	protein ubiquitination//nucleosome assembly	GO:0003677//GO:0046872//GO:0005515//GO:0004842//GO:0008270	DNA binding//metal ion binding//protein binding//ubiquitin-protein transferase activity//zinc ion binding	GO:0000786//GO:0005634//GO:0005680	nucleosome//nucleus//anaphase-promoting complex	--	--
Cluster-342212.148720	1178	514709322	XP_004951756.1	224	2.4e-16	PREDICTED: VQ motif-containing protein 22-like [Setaria italica]	1002238210	XM_015767823.1	107	2e-46	PREDICTED: Oryza sativa Japonica Group transcription factor MafA (LOC4328452), mRNA	--	--	--	--	--	--	--	--	PF00424	REV protein (anti-repression trans-activator protein)	GO:0006355	regulation of transcription, DNA-templated	GO:0003700	transcription factor activity, sequence-specific DNA binding	GO:0005667//GO:0042025	transcription factor complex//host cell nucleus	--	--
Cluster-342212.14259	1652	255594455	XP_002536094.1	192	1.7e-12	HTH-type transcriptional regulator ilvY, putative [Ricinus communis]>gi|223520894|gb|EEF26289.1| HTH-type transcriptional regulator ilvY, putative [Ricinus communis]	113524807	AM260479.1	63	8.15e-22	Ralstonia eutropha H16 chromosome 1	--	--	--	--	Q8VWE6	313	2.3e-27	Probable HTH-type transcriptional regulator LrhA OS=Escherichia coli O157:H7 GN=lrhA PE=3 SV=1	PF05425//PF00126	Copper resistance protein D//Bacterial regulatory helix-turn-helix protein, lysR family	GO:0006355	regulation of transcription, DNA-templated	GO:0003700	transcription factor activity, sequence-specific DNA binding	GO:0005667//GO:0016021	transcription factor complex//integral component of membrane	--	--
Cluster-342212.155386	1081	514751370	XP_004962330.1	328	1.9e-28	PREDICTED: ethylene-responsive transcription factor ERF071-like [Setaria italica]	670413157	XM_008649541.1	156	1.06e-73	PREDICTED: Zea mays LOC100280468 (cl15281_1(600)), transcript variant X1, mRNA	--	--	--	--	O22259	197	4.2e-14	Ethylene-responsive transcription factor ERF071 OS=Arabidopsis thaliana GN=ERF071 PE=2 SV=1	PF00847	AP2 domain	GO:0006355	regulation of transcription, DNA-templated	GO:0003700	transcription factor activity, sequence-specific DNA binding	GO:0005667	transcription factor complex	--	--
Cluster-342212.102557	3424	514720336	XP_004954460.1	290	1.5e-23	PREDICTED: remorin [Setaria italica]	--	--	--	--	--	--	--	--	--	P93788	166	5.2e-10	Remorin OS=Solanum tuberosum PE=1 SV=1	PF06003//PF10186	Survival motor neuron protein (SMN)//Vacuolar sorting 38 and autophagy-related subunit 14	GO:0010508//GO:0006397	positive regulation of autophagy//mRNA processing	GO:0003723	RNA binding	GO:0005737//GO:0005634	cytoplasm//nucleus	--	--
Cluster-342212.7987	2410	--	--	--	--	--	--	--	--	--	--	--	--	--	--	--	--	--	--	PF01907	Ribosomal protein L37e	GO:0042254//GO:0006412	ribosome biogenesis//translation	GO:0003735	structural constituent of ribosome	GO:0005840//GO:0005622	ribosome//intracellular	--	--
Cluster-90237.1	2236	242054705	XP_002456498.1	870	5.6e-91	hypothetical protein SORBIDRAFT_03g037340 [Sorghum bicolor]>gi|241928473|gb|EES01618.1| hypothetical protein SORBIDRAFT_03g037340 [Sorghum bicolor]	835977742	XM_004970225.2	269	3.39e-136	PREDICTED: Setaria italica EID1-like F-box protein 3 (LOC101762873), mRNA	--	--	--	--	Q93ZT5	563	3.2e-56	EID1-like F-box protein 3 OS=Arabidopsis thaliana GN=EDL3 PE=2 SV=1	PF00573//PF12937	Ribosomal protein L4/L1 family//F-box-like	GO:0042254//GO:0006412	ribosome biogenesis//translation	GO:0003735//GO:0005515	structural constituent of ribosome//protein binding	GO:0005840	ribosome	--	--
Cluster-342212.151482	1546	835938617	XP_012699680.1	494	1.5e-47	PREDICTED: remorin-like [Setaria italica]	835938616	XM_012844226.1	318	1.34e-163	PREDICTED: Setaria italica remorin-like (LOC101773437), mRNA	--	--	--	--	Q7XII4	453	1.2e-43	Remorin 4.1 OS=Oryza sativa subsp. japonica GN=REM4.1 PE=1 SV=1	PF00682	HMGL-like	--	--	GO:0003824	catalytic activity	--	--	--	--
Cluster-342212.147412	1877	514813104	XP_004981338.1	763	1.2e-78	PREDICTED: remorin [Setaria italica]	226491465	NM_001147720.1	418	0	Zea mays uncharacterized LOC100273279 (LOC100273279), mRNA >gi|194703179|gb|BT040669.1| Zea mays full-length cDNA clone ZM_BFc0113H04 mRNA, complete cds	--	--	--	--	Q7XII4	528	3e-52	Remorin 4.1 OS=Oryza sativa subsp. japonica GN=REM4.1 PE=1 SV=1	PF06424//PF00796//PF06003//PF00682	PRP1 splicing factor, N-terminal//Photosystem I reaction centre subunit VIII//Survival motor neuron protein (SMN)//HMGL-like	GO:0006397//GO:0000398//GO:0015979	mRNA processing//mRNA splicing, via spliceosome//photosynthesis	GO:0003824//GO:0003723	catalytic activity//RNA binding	GO:0005737//GO:0005634//GO:0009522	cytoplasm//nucleus//photosystem I	--	--
Cluster-342212.151483	1409	835938617	XP_012699680.1	544	2.2e-53	PREDICTED: remorin-like [Setaria italica]	835938616	XM_012844226.1	540	0	PREDICTED: Setaria italica remorin-like (LOC101773437), mRNA	--	--	--	--	Q7XII4	502	2.4e-49	Remorin 4.1 OS=Oryza sativa subsp. japonica GN=REM4.1 PE=1 SV=1	PF06736//PF00682	Protein of unknown function (DUF1211)//HMGL-like	GO:0006813	potassium ion transport	GO:0003824//GO:0005267	catalytic activity//potassium channel activity	--	--	--	--
Cluster-342212.151485	1427	835938617	XP_012699680.1	572	1.3e-56	PREDICTED: remorin-like [Setaria italica]	835938616	XM_012844226.1	585	0	PREDICTED: Setaria italica remorin-like (LOC101773437), mRNA	--	--	--	--	Q7XII4	519	2.5e-51	Remorin 4.1 OS=Oryza sativa subsp. japonica GN=REM4.1 PE=1 SV=1	PF06736//PF00682	Protein of unknown function (DUF1211)//HMGL-like	GO:0006813	potassium ion transport	GO:0003824//GO:0005267	catalytic activity//potassium channel activity	--	--	--	--
Cluster-342212.219983	2352	514747008	XP_004961265.1	1759	4.8e-194	PREDICTED: protein ASPARTIC PROTEASE IN GUARD CELL 1-like [Setaria italica]	835939796	XM_004961208.2	747	0	PREDICTED: Setaria italica protein ASPARTIC PROTEASE IN GUARD CELL 1-like (LOC101757807), mRNA	--	--	--	--	Q9LNJ3	438	1e-41	Aspartyl protease family protein 2 OS=Arabidopsis thaliana GN=APF2 PE=2 SV=1	PF00026	Eukaryotic aspartyl protease	GO:0006508	proteolysis	GO:0004190	aspartic-type endopeptidase activity	--	--	--	--
Cluster-342212.143926	2697	514732773	XP_004957514.1	2119	1e-235	PREDICTED: aspartic proteinase-like protein 1 [Setaria italica]	955715773	XM_004957457.2	856	0	PREDICTED: Setaria italica aspartic proteinase-like protein 1 (LOC101756556), mRNA	--	--	--	--	Q8VYV9	1117	2.2e-120	Aspartyl protease family protein 1 OS=Arabidopsis thaliana GN=APF1 PE=1 SV=1	PF00026	Eukaryotic aspartyl protease	GO:0006508	proteolysis	GO:0004190	aspartic-type endopeptidase activity	--	--	--	--
Cluster-342212.88484	1292	670374198	XP_008668462.1	1419	7.1e-155	PREDICTED: uncharacterized protein LOC100383966 isoform X1 [Zea mays]>gi|414588341|tpg|DAA38912.1| TPA: hypothetical protein ZEAMMB73_639977 [Zea mays]	955723503	XM_004978862.3	740	0	PREDICTED: Setaria italica amino acid permease 3-like (LOC101775488), mRNA	--	--	--	--	Q39134	1123	2.1e-121	Amino acid permease 3 OS=Arabidopsis thaliana GN=AAP3 PE=1 SV=2	PF03222//PF03845//PF01002	Tryptophan/tyrosine permease family//Spore germination protein//Flavivirus non-structural protein NS2B	GO:0003333//GO:0009847	amino acid transmembrane transport//spore germination	GO:0004252	serine-type endopeptidase activity	GO:0019012//GO:0016021	virion//integral component of membrane	--	--
Cluster-342212.93641	762	514751759	XP_004962416.1	148	1e-07	PREDICTED: probable WRKY transcription factor 26 [Setaria italica]	--	--	--	--	--	--	--	--	--	--	--	--	--	PF02903	Alpha amylase, N-terminal ig-like domain	GO:0005975	carbohydrate metabolic process	GO:0004553	hydrolase activity, hydrolyzing O-glycosyl compounds	--	--	--	--
Cluster-342212.15532	1018	514821795	XP_004985574.1	245	7.5e-19	PREDICTED: late embryogenesis abundant protein, group 3-like [Setaria italica]	836019859	XM_004985517.2	173	3.52e-83	PREDICTED: Setaria italica late embryogenesis abundant protein, group 3-like (LOC101779346), mRNA	--	--	--	--	--	--	--	--	PF11837	Domain of unknown function (DUF3357)	GO:0005982//GO:0006012//GO:0005985	starch metabolic process//galactose metabolic process//sucrose metabolic process	GO:0004564//GO:0004575	beta-fructofuranosidase activity//sucrose alpha-glucosidase activity	GO:0017177	glucosidase II complex	--	--
Cluster-342212.144035	2555	242094380	XP_002437680.1	2155	6.3e-240	hypothetical protein SORBIDRAFT_10g000660 [Sorghum bicolor]>gi|241915903|gb|EER89047.1| hypothetical protein SORBIDRAFT_10g000660 [Sorghum bicolor]	195644725	EU969713.1	813	0	Zea mays clone 334608 glycoside hydrolase, family 28 mRNA, complete cds	--	--	--	--	A7PZL3	1609	1.8e-177	Probable polygalacturonase OS=Vitis vinifera GN=GSVIVT00026920001 PE=1 SV=1	PF00295	Glycosyl hydrolases family 28	GO:0005975//GO:0005985//GO:0005982	carbohydrate metabolic process//sucrose metabolic process//starch metabolic process	GO:0004650	polygalacturonase activity	GO:0005618//GO:0005576	cell wall//extracellular region	--	--
Cluster-342212.172183	934	242052709	XP_002455500.1	663	2.4e-67	hypothetical protein SORBIDRAFT_03g012280 [Sorghum bicolor]>gi|241927475|gb|EES00620.1| hypothetical protein SORBIDRAFT_03g012280 [Sorghum bicolor]	960470009	XM_003567526.3	262	1.08e-132	PREDICTED: Brachypodium distachyon polygalacturonase At1g48100 (LOC100827672), mRNA	--	--	--	--	Q949Z1	513	8.3e-51	Polygalacturonase At1g48100 OS=Arabidopsis thaliana GN=At1g48100 PE=2 SV=1	PF00295	Glycosyl hydrolases family 28	GO:0005982//GO:0005985//GO:0005975	starch metabolic process//sucrose metabolic process//carbohydrate metabolic process	GO:0004650	polygalacturonase activity	GO:0005576	extracellular region	--	--
Cluster-342212.143979	2119	242094380	XP_002437680.1	1220	1.4e-131	hypothetical protein SORBIDRAFT_10g000660 [Sorghum bicolor]>gi|241915903|gb|EER89047.1| hypothetical protein SORBIDRAFT_10g000660 [Sorghum bicolor]	--	--	--	--	--	--	--	--	--	A7PZL3	895	9.5e-95	Probable polygalacturonase OS=Vitis vinifera GN=GSVIVT00026920001 PE=1 SV=1	PF00295	Glycosyl hydrolases family 28	GO:0005985//GO:0005975//GO:0005982	sucrose metabolic process//carbohydrate metabolic process//starch metabolic process	GO:0004650	polygalacturonase activity	GO:0005618//GO:0005576	cell wall//extracellular region	--	--
Cluster-342212.156791	3268	115437458	NP_001043300.1	1053	4.9e-112	Os01g0550200 [Oryza sativa Japonica Group]>gi|20161770|dbj|BAB90686.1| unknown protein [Oryza sativa Japonica Group]>gi|20521465|dbj|BAB91973.1| unknown protein [Oryza sativa Japonica Group]>gi|113532831|dbj|BAF05214.1| Os01g0550200 [Oryza sativa Japonica Group]	--	--	--	--	--	--	--	--	--	Q93YV9	708	7.1e-73	F-box protein SKIP8 OS=Arabidopsis thaliana GN=SKIP8 PE=1 SV=1	PF06881//PF08332//PF00646//PF15966//PF12937//PF10099	RNA polymerase II transcription factor SIII (Elongin) subunit A//Calcium/calmodulin dependent protein kinase II association domain//F-box domain//F-box//F-box-like//Anti-sigma-K factor rskA	GO:0016310//GO:0009069//GO:0006468//GO:0006355	phosphorylation//serine family amino acid metabolic process//protein phosphorylation//regulation of transcription, DNA-templated	GO:0004683//GO:0005515//GO:0005516	calmodulin-dependent protein kinase activity//protein binding//calmodulin binding	GO:0005886//GO:0016021//GO:0005634	plasma membrane//integral component of membrane//nucleus	--	--
Cluster-342212.89379	2476	514720336	XP_004954460.1	190	4.4e-12	PREDICTED: remorin [Setaria italica]	955708485	XM_004954403.3	110	9.17e-48	PREDICTED: Setaria italica remorin (LOC101772339), mRNA	--	--	--	--	--	--	--	--	PF14572//PF07749//PF06936//PF15168	Phosphoribosyl synthetase-associated domain//Endoplasmic reticulum protein ERp29, C-terminal domain//Selenoprotein S (SelS)//Triple QxxK/R motif-containing protein family	GO:0006144//GO:0009165//GO:0006098//GO:0006886	purine nucleobase metabolic process//nucleotide biosynthetic process//pentose-phosphate shunt//intracellular protein transport	GO:0004749//GO:0000287	ribose phosphate diphosphokinase activity//magnesium ion binding	GO:0030176//GO:0005789//GO:0005783	integral component of endoplasmic reticulum membrane//endoplasmic reticulum membrane//endoplasmic reticulum	--	--
Cluster-342212.102551	490	573923217	XP_006649189.1	204	2.1e-14	PREDICTED: remorin-like [Oryza brachyantha]	--	--	--	--	--	--	--	--	--	P93788	159	4.8e-10	Remorin OS=Solanum tuberosum PE=1 SV=1	PF14572	Phosphoribosyl synthetase-associated domain	GO:0009165//GO:0006098//GO:0006144	nucleotide biosynthetic process//pentose-phosphate shunt//purine nucleobase metabolic process	GO:0004749//GO:0000287	ribose phosphate diphosphokinase activity//magnesium ion binding	--	--	--	--
Cluster-342212.228868	3051	242044576	XP_002460159.1	2159	2.6e-240	hypothetical protein SORBIDRAFT_02g023630 [Sorghum bicolor]>gi|241923536|gb|EER96680.1| hypothetical protein SORBIDRAFT_02g023630 [Sorghum bicolor]	835924592	XM_004956656.2	809	0	PREDICTED: Setaria italica U-box domain-containing protein 19-like (LOC101772081), mRNA	--	--	--	--	O80742	734	6.4e-76	U-box domain-containing protein 19 OS=Arabidopsis thaliana GN=PUB19 PE=2 SV=1	PF04564//PF00514//PF11789	U-box domain//Armadillo/beta-catenin-like repeat//Zinc-finger of the MIZ type in Nse subunit	GO:0016567	protein ubiquitination	GO:0004842//GO:0008270//GO:0005515	ubiquitin-protein transferase activity//zinc ion binding//protein binding	--	--	--	--
Cluster-342212.243458	1223	514764205	XP_004965453.1	628	3.5e-63	PREDICTED: late embryogenesis abundant protein D-34-like [Setaria italica]	835963464	XM_004965396.2	447	0	PREDICTED: Setaria italica late embryogenesis abundant protein D-34-like (LOC101768389), mRNA	--	--	--	--	P09444	273	7.3e-23	Late embryogenesis abundant protein D-34 OS=Gossypium hirsutum PE=3 SV=1	PF00721	Virus coat protein (TMV like)	--	--	GO:0005198	structural molecule activity	GO:0019028	viral capsid	--	--
Cluster-342212.221600	1377	514726143	XP_004955906.1	1224	3.1e-132	PREDICTED: metal transporter Nramp5-like [Setaria italica]	835930314	XM_004955849.2	589	0	PREDICTED: Setaria italica metal transporter Nramp5-like (LOC101769670), mRNA	--	--	--	--	Q8H4H5	1114	2.5e-120	Metal transporter Nramp5 OS=Oryza sativa subsp. japonica GN=NRAMP5 PE=2 SV=1	PF01566	Natural resistance-associated macrophage protein	GO:0006810	transport	GO:0005215	transporter activity	GO:0016020	membrane	KOG1291	Mn2+ and Fe2+ transporters of the NRAMP family
Cluster-342212.167522	823	475600107	EMT24437.1	430	2.2e-40	Peptide transporter PTR1 [Aegilops tauschii]	835998016	XM_004975632.2	208	9.87e-103	PREDICTED: Setaria italica protein NRT1/ PTR FAMILY 4.3-like (LOC101782216), mRNA	--	--	--	--	Q56XQ6	310	2.5e-27	Protein NRT1/ PTR FAMILY 4.4 OS=Arabidopsis thaliana GN=NPF4.4 PE=2 SV=1	PF00854//PF00664	POT family//ABC transporter transmembrane region	GO:0055085//GO:0006810	transmembrane transport//transport	GO:0005215//GO:0005524//GO:0042626	transporter activity//ATP binding//ATPase activity, coupled to transmembrane movement of substances	GO:0016020//GO:0016021	membrane//integral component of membrane	--	--
Cluster-342212.170837	3161	242051128	XP_002463308.1	927	1.9e-97	hypothetical protein SORBIDRAFT_02g041520 [Sorghum bicolor]>gi|241926685|gb|EER99829.1| hypothetical protein SORBIDRAFT_02g041520 [Sorghum bicolor]	835991894	XM_004972550.2	105	7.07e-45	PREDICTED: Setaria italica cysteine-rich and transmembrane domain-containing protein A-like (LOC101757343), mRNA	--	--	--	--	--	--	--	--	PF06682//PF13516//PF04506	SOCE-associated regulatory factor of calcium homoeostasis//Leucine Rich repeat//Rft protein	GO:0006869//GO:2001256	lipid transport//regulation of store-operated calcium entry	GO:0005319//GO:0005515	lipid transporter activity//protein binding	GO:0016021//GO:0030176	integral component of membrane//integral component of endoplasmic reticulum membrane	--	--
Cluster-342212.69707	1436	242096748	XP_002438864.1	348	1.2e-30	hypothetical protein SORBIDRAFT_10g027460 [Sorghum bicolor]>gi|241917087|gb|EER90231.1| hypothetical protein SORBIDRAFT_10g027460 [Sorghum bicolor]	835961659	XM_004966174.2	176	1.08e-84	PREDICTED: Setaria italica early nodulin-like protein 2 (LOC101774325), mRNA	--	--	--	--	Q9T076	184	1.8e-12	Early nodulin-like protein 2 OS=Arabidopsis thaliana GN=At4g27520 PE=1 SV=1	PF02298	Plastocyanin-like domain	GO:0006118	obsolete electron transport	GO:0005507//GO:0009055	copper ion binding//electron carrier activity	--	--	--	--
Cluster-342212.177901	2369	514820623	XP_004984998.1	1180	6.7e-127	PREDICTED: uncharacterized protein LOC101761881 [Setaria italica]	955724304	XM_014805840.1	474	0	PREDICTED: Setaria italica uncharacterized LOC101760823 (LOC101760823), mRNA	--	--	--	--	--	--	--	--	PF13405//PF13202//PF13499//PF00036//PF13833	EF-hand domain//EF hand//EF-hand domain pair//EF hand//EF-hand domain pair	--	--	GO:0005509	calcium ion binding	--	--	--	--
Cluster-342212.135488	2548	115440891	NP_001044725.1	1712	1.5e-188	Os01g0835500 [Oryza sativa Japonica Group]>gi|20160800|dbj|BAB89740.1| putative respiratory burst oxidase [Oryza sativa Japonica Group]>gi|113534256|dbj|BAF06639.1| Os01g0835500 [Oryza sativa Japonica Group]>gi|125528292|gb|EAY76406.1| hypothetical protein OsI_04336 [Oryza sativa Indica Group]>gi|125572550|gb|EAZ14065.1| hypothetical protein OsJ_03990 [Oryza sativa Japonica Group]	--	--	--	--	--	--	--	--	--	Q9LZU9	1150	3.1e-124	Putative respiratory burst oxidase homolog protein J OS=Arabidopsis thaliana GN=RBOHJ PE=3 SV=2	PF02178//PF08030//PF00175//PF08022	AT hook motif//Ferric reductase NAD binding domain//Oxidoreductase NAD-binding domain//FAD-binding domain	GO:0022900//GO:0006979//GO:0055114//GO:0006804	electron transport chain//response to oxidative stress//oxidation-reduction process//obsolete peroxidase reaction	GO:0005509//GO:0050664//GO:0003677//GO:0016491//GO:0004601	calcium ion binding//oxidoreductase activity, acting on NAD(P)H, oxygen as acceptor//DNA binding//oxidoreductase activity//peroxidase activity	GO:0016021	integral component of membrane	KOG0039	Ferric reductase, NADH/NADPH oxidase and related proteins
Cluster-342212.34228	2073	514748538	XP_004961642.1	595	4e-59	PREDICTED: EID1-like F-box protein 3 [Setaria italica]	835948856	XM_004961585.2	326	6.47e-168	PREDICTED: Setaria italica EID1-like F-box protein 3 (LOC101768896), mRNA	--	--	--	--	Q9FLZ8	276	5.6e-23	EID1-like F-box protein 2 OS=Arabidopsis thaliana GN=EDL2 PE=2 SV=1	PF12937//PF00646	F-box-like//F-box domain	--	--	GO:0005515	protein binding	--	--	--	--
Cluster-342212.70786	813	514715850	XP_004953350.1	472	2.9e-45	PREDICTED: uncharacterized protein LOC101753554 [Setaria italica]	835912754	XM_004953293.2	204	1.63e-100	PREDICTED: Setaria italica uncharacterized LOC101753554 (LOC101753554), mRNA	--	--	--	--	--	--	--	--	PF00628	PHD-finger	--	--	GO:0005515	protein binding	--	--	--	--
Cluster-342212.34230	2038	514748538	XP_004961642.1	584	7.4e-58	PREDICTED: EID1-like F-box protein 3 [Setaria italica]	835948856	XM_004961585.2	301	5.02e-154	PREDICTED: Setaria italica EID1-like F-box protein 3 (LOC101768896), mRNA	--	--	--	--	Q93ZT5	322	2.5e-28	EID1-like F-box protein 3 OS=Arabidopsis thaliana GN=EDL3 PE=2 SV=1	PF00157//PF00646//PF12937	Pou domain - N-terminal to homeobox domain//F-box domain//F-box-like	GO:0006355	regulation of transcription, DNA-templated	GO:0005515//GO:0003700	protein binding//transcription factor activity, sequence-specific DNA binding	GO:0005667	transcription factor complex	--	--
Cluster-342212.208778	3256	836029195	XP_012698460.1	925	3.4e-97	PREDICTED: uncharacterized WD repeat-containing protein C2A9.03-like isoform X2 [Setaria italica]	836029194	XM_012843006.1	414	0	PREDICTED: Setaria italica uncharacterized WD repeat-containing protein C2A9.03-like (LOC101752696), transcript variant X2, mRNA	--	--	--	--	Q9Y7K5	327	1.1e-28	Uncharacterized WD repeat-containing protein C2A9.03 OS=Schizosaccharomyces pombe (strain 972 / ATCC 24843) GN=SPBC2A9.03 PE=4 SV=2	PF03088//PF00400//PF09142//PF10584	Strictosidine synthase//WD domain, G-beta repeat//tRNA Pseudouridine synthase II, C terminal//Proteasome subunit A N-terminal signature	GO:0042432//GO:0009451//GO:0001522//GO:0006511//GO:0016114//GO:0009058	indole biosynthetic process//RNA modification//pseudouridine synthesis//ubiquitin-dependent protein catabolic process//terpenoid biosynthetic process//biosynthetic process	GO:0005515//GO:0004175//GO:0003723//GO:0009982//GO:0016844	protein binding//endopeptidase activity//RNA binding//pseudouridine synthase activity//strictosidine synthase activity	GO:0019773	proteasome core complex, alpha-subunit complex	KOG0263	Transcription initiation factor TFIID, subunit TAF5 (also component of histone acetyltransferase SAGA)
Cluster-342212.170838	3198	242051128	XP_002463308.1	927	2e-97	hypothetical protein SORBIDRAFT_02g041520 [Sorghum bicolor]>gi|241926685|gb|EER99829.1| hypothetical protein SORBIDRAFT_02g041520 [Sorghum bicolor]	835991894	XM_004972550.2	120	3.28e-53	PREDICTED: Setaria italica cysteine-rich and transmembrane domain-containing protein A-like (LOC101757343), mRNA	--	--	--	--	--	--	--	--	PF04506//PF06682//PF13516	Rft protein//SOCE-associated regulatory factor of calcium homoeostasis//Leucine Rich repeat	GO:0006869//GO:2001256	lipid transport//regulation of store-operated calcium entry	GO:0005515//GO:0005319	protein binding//lipid transporter activity	GO:0016021//GO:0030176	integral component of membrane//integral component of endoplasmic reticulum membrane	--	--
Cluster-342212.77777	4399	514794585	XP_004973094.1	459	5e-43	PREDICTED: zinc finger protein CONSTANS-LIKE 1-like [Setaria italica]	514794584	XM_004973037.1	303	8.45e-155	PREDICTED: Setaria italica zinc finger protein CONSTANS-LIKE 1-like (LOC101786237), mRNA	--	--	--	--	O82117	147	1.1e-07	Zinc finger protein CO3 OS=Oryza sativa subsp. japonica GN=CO3 PE=2 SV=1	PF01077//PF00643//PF06203	Nitrite and sulphite reductase 4Fe-4S domain//B-box zinc finger//CCT motif	GO:0055114	oxidation-reduction process	GO:0005515//GO:0051536//GO:0008270//GO:0020037//GO:0016491	protein binding//iron-sulfur cluster binding//zinc ion binding//heme binding//oxidoreductase activity	GO:0005622	intracellular	--	--
Cluster-342212.98969	3486	242070277	XP_002450415.1	1352	1.1e-146	hypothetical protein SORBIDRAFT_05g004940 [Sorghum bicolor]>gi|241936258|gb|EES09403.1| hypothetical protein SORBIDRAFT_05g004940 [Sorghum bicolor]	242070276	XM_002450370.1	511	0	Sorghum bicolor hypothetical protein, mRNA	--	--	--	--	Q84TH5	804	5.6e-84	ABC transporter G family member 25 OS=Arabidopsis thaliana GN=ABCG25 PE=2 SV=1	PF04988//PF01061//PF15060	A-kinase anchoring protein 95 (AKAP95)//ABC-2 type transporter//Differentiation and proliferation regulator	GO:0080168//GO:0009737//GO:0030154//GO:0007275//GO:0006200	abscisic acid transport//response to abscisic acid//cell differentiation//multicellular organismal development//obsolete ATP catabolic process	GO:0005524//GO:0003677//GO:0016887	ATP binding//DNA binding//ATPase activity	GO:0005634//GO:0016020//GO:0005886	nucleus//membrane//plasma membrane	KOG0061	Transporter, ABC superfamily (Breast cancer resistance protein)
Cluster-342212.98967	970	414588399	DAA38970.1	701	9.6e-72	TPA: hypothetical protein ZEAMMB73_453991 [Zea mays]	1002303671	XM_015759727.1	238	2.46e-119	PREDICTED: Oryza sativa Japonica Group ABC transporter G family member 25 (LOC4349927), mRNA	--	--	--	--	Q84TH5	488	6.8e-48	ABC transporter G family member 25 OS=Arabidopsis thaliana GN=ABCG25 PE=2 SV=1	PF03193//PF01637//PF13304//PF02224//PF00005	Protein of unknown function, DUF258//Archaeal ATPase//AAA domain, putative AbiEii toxin, Type IV TA system//Cytidylate kinase//ABC transporter	GO:0006139//GO:0006206	nucleobase-containing compound metabolic process//pyrimidine nucleobase metabolic process	GO:0005525//GO:0003924//GO:0004127//GO:0016887//GO:0005524	GTP binding//GTPase activity//cytidylate kinase activity//ATPase activity//ATP binding	--	--	KOG0061	Transporter, ABC superfamily (Breast cancer resistance protein)
Cluster-342212.17601	802	414865027	DAA43584.1	271	5.7e-22	TPA: embryonic protein DC-8 [Zea mays]	836019859	XM_004985517.2	361	0	PREDICTED: Setaria italica late embryogenesis abundant protein, group 3-like (LOC101779346), mRNA	--	--	--	--	--	--	--	--	PF01442//PF02932	Apolipoprotein A1/A4/E domain//Neurotransmitter-gated ion-channel transmembrane region	GO:0042157//GO:0006869//GO:0006811	lipoprotein metabolic process//lipid transport//ion transport	GO:0008289	lipid binding	GO:0016020//GO:0005576	membrane//extracellular region	--	--
Cluster-318047.0	958	761960437	KIY94160.1	159	6.7e-09	hypothetical protein MNEG_13802 [Monoraphidium neglectum]	--	--	--	--	--	--	--	--	--	--	--	--	--	PF07464//PF00430//PF01442	Apolipophorin-III precursor (apoLp-III)//ATP synthase B/B' CF(0)//Apolipoprotein A1/A4/E domain	GO:0015986//GO:0042157//GO:0015992//GO:0006869	ATP synthesis coupled proton transport//lipoprotein metabolic process//proton transport//lipid transport	GO:0008289//GO:0015078	lipid binding//hydrogen ion transmembrane transporter activity	GO:0045263//GO:0005576	proton-transporting ATP synthase complex, coupling factor F(o)//extracellular region	--	--
Cluster-342212.16816	463	--	--	--	--	--	--	--	--	--	--	--	--	--	--	--	--	--	--	PF00909//PF03618//PF02272	Ammonium Transporter Family//Kinase/pyrophosphorylase//DHHA1 domain	GO:0015696	ammonium transport	GO:0008519//GO:0003676//GO:0016772//GO:0005524	ammonium transmembrane transporter activity//nucleic acid binding//transferase activity, transferring phosphorus-containing groups//ATP binding	GO:0016020	membrane	--	--
Cluster-342212.69706	1318	514767390	XP_004966231.1	582	8.2e-58	PREDICTED: early nodulin-like protein 2 [Setaria italica]	835961659	XM_004966174.2	230	9.46e-115	PREDICTED: Setaria italica early nodulin-like protein 2 (LOC101774325), mRNA	--	--	--	--	Q9SK27	261	1.9e-21	Early nodulin-like protein 1 OS=Arabidopsis thaliana GN=At2g25060 PE=1 SV=2	PF02298	Plastocyanin-like domain	GO:0006118	obsolete electron transport	GO:0009055	electron carrier activity	--	--	--	--
Cluster-342212.123811	1069	242033227	XP_002464008.1	487	6.9e-47	hypothetical protein SORBIDRAFT_01g010510 [Sorghum bicolor]>gi|241917862|gb|EER91006.1| hypothetical protein SORBIDRAFT_01g010510 [Sorghum bicolor]	1002249183	XM_015773282.1	231	2.12e-115	PREDICTED: Oryza sativa Japonica Group chemocyanin (LOC4333872), mRNA	--	--	--	--	P60496	388	3e-36	Chemocyanin OS=Lilium longiflorum PE=1 SV=1	PF02298//PF06525	Plastocyanin-like domain//Sulfocyanin (SoxE) domain	GO:0006118//GO:0055114	obsolete electron transport//oxidation-reduction process	GO:0009055//GO:0005507	electron carrier activity//copper ion binding	--	--	--	--
Cluster-342212.208775	3139	836029195	XP_012698460.1	1429	1.2e-155	PREDICTED: uncharacterized WD repeat-containing protein C2A9.03-like isoform X2 [Setaria italica]	836029194	XM_012843006.1	605	0	PREDICTED: Setaria italica uncharacterized WD repeat-containing protein C2A9.03-like (LOC101752696), transcript variant X2, mRNA	--	--	--	--	Q9Y7K5	327	1e-28	Uncharacterized WD repeat-containing protein C2A9.03 OS=Schizosaccharomyces pombe (strain 972 / ATCC 24843) GN=SPBC2A9.03 PE=4 SV=2	PF10584//PF09142//PF00400	Proteasome subunit A N-terminal signature//tRNA Pseudouridine synthase II, C terminal//WD domain, G-beta repeat	GO:0006511//GO:0001522//GO:0009451	ubiquitin-dependent protein catabolic process//pseudouridine synthesis//RNA modification	GO:0009982//GO:0003723//GO:0004175//GO:0005515	pseudouridine synthase activity//RNA binding//endopeptidase activity//protein binding	GO:0019773	proteasome core complex, alpha-subunit complex	KOG0266	WD40 repeat-containing protein
Cluster-342212.165649	1700	514785343	XP_004970815.1	567	5.8e-56	PREDICTED: NAC domain-containing protein 48 [Setaria italica]	391415215	BT065082.2	218	5.75e-108	Zea mays full-length cDNA clone ZM_BFb0054J18 mRNA, complete cds	--	--	--	--	Q7F2L3	516	6.8e-51	NAC domain-containing protein 48 OS=Oryza sativa subsp. japonica GN=NAC48 PE=2 SV=1	PF01613	Flavin reductase like domain	--	--	GO:0010181	FMN binding	--	--	--	--
Cluster-342212.126501	413	--	--	--	--	--	--	--	--	--	--	--	--	--	--	--	--	--	--	PF04205	FMN-binding domain	--	--	GO:0010181	FMN binding	GO:0016020	membrane	--	--
Cluster-342212.185558	1379	--	--	--	--	--	--	--	--	--	--	--	--	--	--	--	--	--	--	PF02411	MerT mercuric transport protein	GO:0015694	mercury ion transport	GO:0015097	mercury ion transmembrane transporter activity	GO:0016020	membrane	--	--
Cluster-342212.216182	1858	218195022	EEC77449.1	144	7.1e-07	hypothetical protein OsI_16257 [Oryza sativa Indica Group]	1002262127	XM_015779938.1	80	3.26e-31	PREDICTED: Oryza sativa Japonica Group small nuclear ribonucleoprotein Sm D1 (LOC4336118), transcript variant X2, mRNA	--	--	--	--	--	--	--	--	PF03604//PF10766	DNA directed RNA polymerase, 7 kDa subunit//Multidrug efflux pump-associated protein AcrZ	GO:0006206//GO:0015893//GO:0006144//GO:0006351//GO:0006855	pyrimidine nucleobase metabolic process//drug transport//purine nucleobase metabolic process//transcription, DNA-templated//drug transmembrane transport	GO:0015238//GO:0003677//GO:0003899	drug transmembrane transporter activity//DNA binding//DNA-directed RNA polymerase activity	GO:0005886//GO:0005730	plasma membrane//nucleolus	--	--
Cluster-342212.210257	1321	357168264	XP_003581564.1	855	1.8e-89	PREDICTED: naringenin,2-oxoglutarate 3-dioxygenase-like [Brachypodium distachyon]	242382969	FP092210.1	385	0	Phyllostachys edulis cDNA clone: bphyem204g06, full insert sequence	--	--	--	--	Q9ZSA8	653	6.8e-67	Protein DMR6-LIKE OXYGENASE 1 OS=Arabidopsis thaliana GN=DLO1 PE=1 SV=1	PF03171	2OG-Fe(II) oxygenase superfamily	GO:0055114	oxidation-reduction process	GO:0016491	oxidoreductase activity	--	--	--	--
Cluster-342212.179456	1389	414585764	DAA36335.1	910	8e-96	TPA: hypothetical protein ZEAMMB73_926701 [Zea mays]	835998321	XM_012847269.1	402	0	PREDICTED: Setaria italica 1-aminocyclopropane-1-carboxylate oxidase 5-like (LOC101764405), mRNA	--	--	--	--	Q9ZSA8	637	5.1e-65	Protein DMR6-LIKE OXYGENASE 1 OS=Arabidopsis thaliana GN=DLO1 PE=1 SV=1	PF03171	2OG-Fe(II) oxygenase superfamily	GO:0055114	oxidation-reduction process	GO:0016491	oxidoreductase activity	--	--	--	--
Cluster-342212.212340	2601	414585764	DAA36335.1	493	3.4e-47	TPA: hypothetical protein ZEAMMB73_926701 [Zea mays]	835998321	XM_012847269.1	239	1.88e-119	PREDICTED: Setaria italica 1-aminocyclopropane-1-carboxylate oxidase 5-like (LOC101764405), mRNA	--	--	--	--	Q9ZSA8	377	1.4e-34	Protein DMR6-LIKE OXYGENASE 1 OS=Arabidopsis thaliana GN=DLO1 PE=1 SV=1	PF03171	2OG-Fe(II) oxygenase superfamily	GO:0055114	oxidation-reduction process	GO:0016491	oxidoreductase activity	--	--	--	--
Cluster-342212.202659	2332	414585764	DAA36335.1	910	1.3e-95	TPA: hypothetical protein ZEAMMB73_926701 [Zea mays]	835998321	XM_012847269.1	402	0	PREDICTED: Setaria italica 1-aminocyclopropane-1-carboxylate oxidase 5-like (LOC101764405), mRNA	--	--	--	--	Q9ZSA8	637	8.6e-65	Protein DMR6-LIKE OXYGENASE 1 OS=Arabidopsis thaliana GN=DLO1 PE=1 SV=1	PF03171	2OG-Fe(II) oxygenase superfamily	GO:0055114	oxidation-reduction process	GO:0016491	oxidoreductase activity	--	--	--	--
Cluster-342212.68014	1029	514783894	XP_004970458.1	1048	5.9e-112	PREDICTED: leucoanthocyanidin dioxygenase-like [Setaria italica]>gi|514783898|ref|XP_004970459.1| PREDICTED: leucoanthocyanidin dioxygenase-like [Setaria italica]	514783897	XM_004970402.1	426	0	PREDICTED: Setaria italica leucoanthocyanidin dioxygenase-like (LOC101763544), transcript variant X2, mRNA	--	--	--	--	Q9FFF6	704	6.5e-73	Probable 2-oxoglutarate-dependent dioxygenase At5g05600 OS=Arabidopsis thaliana GN=At5g05600 PE=2 SV=1	PF03171	2OG-Fe(II) oxygenase superfamily	GO:0055114	oxidation-reduction process	GO:0016491	oxidoreductase activity	--	--	--	--
Cluster-342212.111341	708	218191991	EEC74418.1	915	1.1e-96	hypothetical protein OsI_09784 [Oryza sativa Indica Group]	955724712	XM_004985864.3	341	9.81e-177	PREDICTED: Setaria italica flavanone 3-dioxygenase-like (LOC101778265), mRNA	--	--	--	--	Q9FLV0	723	2.8e-75	Protein DOWNY MILDEW RESISTANCE 6 OS=Arabidopsis thaliana GN=DMR6 PE=1 SV=1	PF03171	2OG-Fe(II) oxygenase superfamily	GO:0055114	oxidation-reduction process	GO:0016491	oxidoreductase activity	--	--	--	--
Cluster-342212.244396	936	514764205	XP_004965453.1	336	1.9e-29	PREDICTED: late embryogenesis abundant protein D-34-like [Setaria italica]	242065013	XM_002453751.1	227	3.09e-113	Sorghum bicolor hypothetical protein, mRNA	--	--	--	--	P09444	167	1.1e-10	Late embryogenesis abundant protein D-34 OS=Gossypium hirsutum PE=3 SV=1	PF00148//PF00721	Nitrogenase component 1 type Oxidoreductase//Virus coat protein (TMV like)	GO:0055114	oxidation-reduction process	GO:0016491//GO:0005198	oxidoreductase activity//structural molecule activity	GO:0019028	viral capsid	--	--
Cluster-342212.77776	3098	514794585	XP_004973094.1	459	3.5e-43	PREDICTED: zinc finger protein CONSTANS-LIKE 1-like [Setaria italica]	514794584	XM_004973037.1	303	5.93e-155	PREDICTED: Setaria italica zinc finger protein CONSTANS-LIKE 1-like (LOC101786237), mRNA	--	--	--	--	O82117	147	7.6e-08	Zinc finger protein CO3 OS=Oryza sativa subsp. japonica GN=CO3 PE=2 SV=1	PF01077//PF06203//PF00643	Nitrite and sulphite reductase 4Fe-4S domain//CCT motif//B-box zinc finger	GO:0055114	oxidation-reduction process	GO:0016491//GO:0020037//GO:0008270//GO:0051536//GO:0005515	oxidoreductase activity//heme binding//zinc ion binding//iron-sulfur cluster binding//protein binding	GO:0005622	intracellular	--	--
Cluster-342212.67769	822	670411158	XP_008646701.1	139	1.2e-06	PREDICTED: uncharacterized protein LOC103628239 [Zea mays]	242050131	XM_002462765.1	90	3.89e-37	Sorghum bicolor hypothetical protein, mRNA	--	--	--	--	--	--	--	--	PF00494//PF00884//PF13413	Squalene/phytoene synthase//Sulfatase//Helix-turn-helix domain	GO:0009058//GO:0008152	biosynthetic process//metabolic process	GO:0016740//GO:0003677//GO:0008484	transferase activity//DNA binding//sulfuric ester hydrolase activity	--	--	--	--
Cluster-342212.67773	838	326519450	BAJ96724.1	145	2.5e-07	predicted protein, partial [Hordeum vulgare subsp. vulgare]>gi|326526533|dbj|BAJ97283.1| predicted protein, partial [Hordeum vulgare subsp. vulgare]	242050131	XM_002462765.1	88	5.13e-36	Sorghum bicolor hypothetical protein, mRNA	--	--	--	--	--	--	--	--	PF00884//PF00494	Sulfatase//Squalene/phytoene synthase	GO:0009058//GO:0008152	biosynthetic process//metabolic process	GO:0016740//GO:0008484	transferase activity//sulfuric ester hydrolase activity	--	--	--	--
Cluster-342212.112145	884	514814392	XP_004981967.1	450	1.1e-42	PREDICTED: cortical cell-delineating protein-like [Setaria italica]	836022677	XM_004981910.2	210	8.22e-104	PREDICTED: Setaria italica cortical cell-delineating protein-like (LOC101778506), mRNA	--	--	--	--	Q01595	210	1.1e-15	Cortical cell-delineating protein OS=Zea mays PE=2 SV=1	PF01075	Glycosyltransferase family 9 (heptosyltransferase)	GO:0008152	metabolic process	GO:0016757	transferase activity, transferring glycosyl groups	--	--	--	--
Cluster-342212.143209	1130	--	--	--	--	--	--	--	--	--	--	--	--	--	--	--	--	--	--	PF12300	Protein of unknown function (DUF3628)	--	--	GO:0016817	hydrolase activity, acting on acid anhydrides	--	--	--	--
Cluster-342212.98968	3502	242070277	XP_002450415.1	1356	3.9e-147	hypothetical protein SORBIDRAFT_05g004940 [Sorghum bicolor]>gi|241936258|gb|EES09403.1| hypothetical protein SORBIDRAFT_05g004940 [Sorghum bicolor]	242070276	XM_002450370.1	523	0	Sorghum bicolor hypothetical protein, mRNA	--	--	--	--	Q84TH5	802	9.5e-84	ABC transporter G family member 25 OS=Arabidopsis thaliana GN=ABCG25 PE=2 SV=1	PF04988//PF01061	A-kinase anchoring protein 95 (AKAP95)//ABC-2 type transporter	GO:0006200//GO:0009737//GO:0080168	obsolete ATP catabolic process//response to abscisic acid//abscisic acid transport	GO:0016887//GO:0005524//GO:0003677	ATPase activity//ATP binding//DNA binding	GO:0005886//GO:0016020//GO:0005634	plasma membrane//membrane//nucleus	KOG0061	Transporter, ABC superfamily (Breast cancer resistance protein)
Cluster-342212.200620	1842	670357756	XP_008669247.1	1462	1e-159	PREDICTED: major facilitator superfamily protein isoform X1 [Zea mays]	--	--	--	--	--	--	--	--	--	Q940M4	902	1.3e-95	Organic cation/carnitine transporter 7 OS=Arabidopsis thaliana GN=OCT7 PE=2 SV=1	PF07690//PF00083	Major Facilitator Superfamily//Sugar (and other) transporter	GO:0055085	transmembrane transport	GO:0022857	transmembrane transporter activity	GO:0016021	integral component of membrane	KOG0253	Synaptic vesicle transporter SV2 (major facilitator superfamily)
Cluster-342212.177677	1313	242044298	XP_002460020.1	341	7.2e-30	hypothetical protein SORBIDRAFT_02g020880 [Sorghum bicolor]>gi|241923397|gb|EER96541.1| hypothetical protein SORBIDRAFT_02g020880 [Sorghum bicolor]	670423506	XM_008654313.1	191	4.51e-93	PREDICTED: Zea mays uncharacterized LOC103632552 (LOC103632552), mRNA	--	--	--	--	--	--	--	--	PF00257//PF05470//PF04931//PF11593	Dehydrin//Eukaryotic translation initiation factor 3 subunit 8 N-terminus//DNA polymerase phi//Mediator complex subunit 3 fungal	GO:0006446//GO:0006413//GO:0006351//GO:0006260//GO:0006950//GO:0006357//GO:0009415	regulation of translational initiation//translational initiation//transcription, DNA-templated//DNA replication//response to stress//regulation of transcription from RNA polymerase II promoter//response to water	GO:0031369//GO:0003887//GO:0003743//GO:0001104//GO:0003677	translation initiation factor binding//DNA-directed DNA polymerase activity//translation initiation factor activity//RNA polymerase II transcription cofactor activity//DNA binding	GO:0042575//GO:0016592//GO:0005852//GO:0005840	DNA polymerase complex//mediator complex//eukaryotic translation initiation factor 3 complex//ribosome	--	--
Cluster-342212.188182	820	1808676	CAA71750.1	159	5.7e-09	hypothetical protein [Sporobolus stapfianus]	--	--	--	--	--	--	--	--	--	--	--	--	--	PF00257//PF00737	Dehydrin//Photosystem II 10 kDa phosphoprotein	GO:0015979//GO:0050821//GO:0009415//GO:0006950	photosynthesis//protein stabilization//response to water//response to stress	GO:0042301	phosphate ion binding	GO:0016020//GO:0009523	membrane//photosystem II	--	--
Cluster-342212.109591	1610	514821317	XP_004985339.1	1318	4.5e-143	PREDICTED: putative polyol transporter 1 [Setaria italica]	836029392	XM_004985282.2	543	0	PREDICTED: Setaria italica putative polyol transporter 1 (LOC101760137), mRNA	--	--	--	--	Q8VZ80	725	3.7e-75	Polyol transporter 5 OS=Arabidopsis thaliana GN=PLT5 PE=1 SV=2	PF07721//PF00083//PF02487//PF07690	Tetratricopeptide repeat//Sugar (and other) transporter//CLN3 protein//Major Facilitator Superfamily	GO:0055085	transmembrane transport	GO:0042802//GO:0022857	identical protein binding//transmembrane transporter activity	GO:0016021//GO:0016020	integral component of membrane//membrane	KOG0254	Predicted transporter (major facilitator superfamily)
Cluster-342212.228213	1138	514709060	XP_004951693.1	598	9.8e-60	PREDICTED: uncharacterized protein LOC101759763 [Setaria italica]	514709059	XM_004951636.1	241	6.24e-121	PREDICTED: Setaria italica uncharacterized LOC101759763 (LOC101759763), mRNA	--	--	--	--	Q5UNY4	210	1.4e-15	Uncharacterized protein L728 OS=Acanthamoeba polyphaga mimivirus GN=MIMI_L728 PE=4 SV=1	PF00320	GATA zinc finger	GO:0006355	regulation of transcription, DNA-templated	GO:0043565//GO:0008270//GO:0003700	sequence-specific DNA binding//zinc ion binding//transcription factor activity, sequence-specific DNA binding	GO:0005667	transcription factor complex	--	--
Cluster-342212.167199	2475	413938012	AFW72563.1	569	4.9e-56	putative homeobox DNA-binding and leucine zipper domain family protein [Zea mays]>gi|645169026|gb|AIB06019.1| HB transcription factor, partial [Zea mays]	955708442	XM_004953233.3	254	8.19e-128	PREDICTED: Setaria italica homeobox-leucine zipper protein HOX24-like (LOC101764633), mRNA	--	--	--	--	A2X7U1	551	8.6e-55	Homeobox-leucine zipper protein HOX24 OS=Oryza sativa subsp. indica GN=HOX24 PE=2 SV=2	PF08287//PF10473//PF01025//PF04632//PF04977//PF07544//PF02183//PF04218//PF04871//PF04111//PF06156//PF10186//PF00046//PF05920//PF06005//PF07716//PF01920//PF06657	Spc19//Leucine-rich repeats of kinetochore protein Cenp-F/LEK1//GrpE//Fusaric acid resistance protein family//Septum formation initiator//RNA polymerase II transcription mediator complex subunit 9//Homeobox associated leucine zipper//CENP-B N-terminal DNA-binding domain//Uso1 / p115 like vesicle tethering protein, C terminal region//Autophagy protein Apg6//Protein of unknown function (DUF972)//Va…	GO:0015031//GO:0006260//GO:0008608//GO:0007049//GO:0006355//GO:0000917//GO:0006810//GO:0006357//GO:0006886//GO:0006457//GO:0006914//GO:0010508//GO:0043093	protein transport//DNA replication//attachment of spindle microtubules to kinetochore//cell cycle//regulation of transcription, DNA-templated//barrier septum assembly//transport//regulation of transcription from RNA polymerase II promoter//intracellular protein transport//protein folding//autophagy//positive regulation of autophagy//FtsZ-dependent cytokinesis	GO:0043565//GO:0051082//GO:0003677//GO:0051087//GO:0003700//GO:0045502//GO:0008017//GO:0008565//GO:0001104//GO:0042803//GO:0000774//GO:0008134	sequence-specific DNA binding//unfolded protein binding//DNA binding//chaperone binding//transcription factor activity, sequence-specific DNA binding//dynein binding//microtubule binding//protein transporter activity//RNA polymerase II transcription cofactor activity//protein homodimerization activity//adenyl-nucleotide exchange factor activity//transcription factor binding	GO:0005886//GO:0016592//GO:0005737//GO:0042729//GO:0016272//GO:0016020//GO:0005876//GO:0045298//GO:0030286//GO:0005667	plasma membrane//mediator complex//cytoplasm//DASH complex//prefoldin complex//membrane//spindle microtubule//tubulin complex//dynein complex//transcription factor complex	--	--
Cluster-342212.22196	1933	514735661	XP_004958213.1	381	2.4e-34	PREDICTED: zinc finger protein ZAT9-like [Setaria italica]	835947081	XM_004962962.2	136	2.51e-62	PREDICTED: Setaria italica zinc finger protein 1-like (LOC101770129), mRNA	--	--	--	--	Q9SSW2	245	2e-19	Zinc finger protein AZF2 OS=Arabidopsis thaliana GN=AZF2 PE=2 SV=1	PF01363//PF13465//PF13912//PF00096	FYVE zinc finger//Zinc-finger double domain//C2H2-type zinc finger//Zinc finger, C2H2 type	--	--	GO:0046872	metal ion binding	--	--	--	--
Cluster-342212.158196	5159	242087915	XP_002439790.1	2610	2.2e-292	hypothetical protein SORBIDRAFT_09g020110 [Sorghum bicolor]>gi|241945075|gb|EES18220.1| hypothetical protein SORBIDRAFT_09g020110 [Sorghum bicolor]	835955011	XM_004962056.2	812	0	PREDICTED: Setaria italica lipase-like (LOC101753899), mRNA	--	--	--	--	Q6I576	2459	1e-275	Squamosa promoter-binding-like protein 9 OS=Oryza sativa subsp. japonica GN=SPL9 PE=2 SV=1	PF03110//PF00490	SBP domain//Delta-aminolevulinic acid dehydratase	GO:0033014//GO:0015994	tetrapyrrole biosynthetic process//chlorophyll metabolic process	GO:0046872//GO:0004655//GO:0003677	metal ion binding//porphobilinogen synthase activity//DNA binding	GO:0005634	nucleus	--	--
Cluster-342212.236595	1172	514730709	XP_004957004.1	721	5.6e-74	PREDICTED: transcription factor bHLH69-like [Setaria italica]	955714992	XM_004956947.3	371	0	PREDICTED: Setaria italica transcription factor bHLH69-like (LOC101756553), mRNA	--	--	--	--	Q9SND4	322	1.5e-28	Transcription factor HEC2 OS=Arabidopsis thaliana GN=HEC2 PE=1 SV=1	PF00010	Helix-loop-helix DNA-binding domain	--	--	GO:0046983	protein dimerization activity	--	--	--	--
Cluster-342212.14279	1164	--	--	--	--	--	--	--	--	--	--	--	--	--	--	--	--	--	--	PF07174	Fibronectin-attachment protein (FAP)	--	--	GO:0050840	extracellular matrix binding	GO:0005576	extracellular region	--	--
Cluster-342212.114601	2772	514773056	XP_004967647.1	649	2.9e-65	PREDICTED: globulin-1 S allele-like [Setaria italica]	514773055	XM_004967590.1	347	1.84e-179	PREDICTED: Setaria italica bromodomain adjacent to zinc finger domain protein 2B-like (LOC101760019), mRNA	--	--	--	--	--	--	--	--	PF04147//PF15836	Nop14-like family//SSTK-interacting protein, TSSK6-activating co-chaperone protein	--	--	GO:0051087	chaperone binding	GO:0032040	small-subunit processome	--	--
Cluster-342212.159868	2943	362112182	AEW12812.1	1616	2.3e-177	4-coumarate CoA ligase [Cenchrus purpureus]>gi|378758474|gb|AFC38426.1| 4-coumarate: CoA ligase [Cenchrus purpureus]	955708917	XM_004951660.3	771	0	PREDICTED: Setaria italica probable 4-coumarate--CoA ligase 3 (LOC101769243), mRNA	K01904	4CL	4-coumarate--CoA ligase	http://www.genome.jp/dbget-bin/www_bget?ko:K01904	Q6ETN3	1580	4.9e-174	Probable 4-coumarate--CoA ligase 3 OS=Oryza sativa subsp. japonica GN=4CL3 PE=2 SV=1	PF00501	AMP-binding enzyme	GO:0008152	metabolic process	GO:0003824//GO:0016874	catalytic activity//ligase activity	--	--	KOG1176	Acyl-CoA synthetase
Cluster-342212.174555	1427	242059355	XP_002458823.1	605	1.9e-60	hypothetical protein SORBIDRAFT_03g040970 [Sorghum bicolor]>gi|241930798|gb|EES03943.1| hypothetical protein SORBIDRAFT_03g040970 [Sorghum bicolor]	242059354	XM_002458778.1	326	4.42e-168	Sorghum bicolor hypothetical protein, mRNA	K14432	ABF	ABA responsive element binding factor	http://www.genome.jp/dbget-bin/www_bget?ko:K14432	P42777	240	5.7e-19	G-box-binding factor 4 OS=Arabidopsis thaliana GN=GBF4 PE=1 SV=1	PF07716//PF00170//PF03131	Basic region leucine zipper//bZIP transcription factor//bZIP Maf transcription factor	GO:0006355	regulation of transcription, DNA-templated	GO:0003700//GO:0003677//GO:0043565	transcription factor activity, sequence-specific DNA binding//DNA binding//sequence-specific DNA binding	GO:0005634//GO:0005667	nucleus//transcription factor complex	--	--
Cluster-342212.66000	1222	514730733	XP_004957010.1	583	5.8e-58	PREDICTED: bZIP transcription factor TRAB1-like [Setaria italica]	514730732	XM_004956953.1	323	1.75e-166	PREDICTED: Setaria italica bZIP transcription factor TRAB1-like (LOC101758999), mRNA	K14432	ABF	ABA responsive element binding factor	http://www.genome.jp/dbget-bin/www_bget?ko:K14432	Q6ZDF3	465	4e-45	bZIP transcription factor TRAB1 OS=Oryza sativa subsp. japonica GN=TRAB1 PE=1 SV=1	PF03131//PF04977//PF07716//PF00170	bZIP Maf transcription factor//Septum formation initiator//Basic region leucine zipper//bZIP transcription factor	GO:0006355//GO:0007049	regulation of transcription, DNA-templated//cell cycle	GO:0003700//GO:0043565//GO:0003677	transcription factor activity, sequence-specific DNA binding//sequence-specific DNA binding//DNA binding	GO:0005634//GO:0005667	nucleus//transcription factor complex	--	--
Cluster-342212.186786	2821	242059355	XP_002458823.1	512	2.3e-49	hypothetical protein SORBIDRAFT_03g040970 [Sorghum bicolor]>gi|241930798|gb|EES03943.1| hypothetical protein SORBIDRAFT_03g040970 [Sorghum bicolor]	1002231500	XM_015757418.1	176	2.14e-84	PREDICTED: Oryza sativa Japonica Group G-box-binding factor 4 (LOC4325078), mRNA	K14432	ABF	ABA responsive element binding factor	http://www.genome.jp/dbget-bin/www_bget?ko:K14432	P42777	176	3e-11	G-box-binding factor 4 OS=Arabidopsis thaliana GN=GBF4 PE=1 SV=1	PF07716//PF00170//PF03131	Basic region leucine zipper//bZIP transcription factor//bZIP Maf transcription factor	GO:0006355	regulation of transcription, DNA-templated	GO:0003700//GO:0043565//GO:0003677	transcription factor activity, sequence-specific DNA binding//sequence-specific DNA binding//DNA binding	GO:0005634//GO:0005667	nucleus//transcription factor complex	--	--
Cluster-342212.213694	1503	514718587	XP_004954029.1	834	5.6e-87	PREDICTED: ABSCISIC ACID-INSENSITIVE 5-like protein 7 [Setaria italica]	955709045	XM_004953972.3	394	0	PREDICTED: Setaria italica ABSCISIC ACID-INSENSITIVE 5-like protein 7 (LOC101778442), mRNA	K14432	ABF	ABA responsive element binding factor	http://www.genome.jp/dbget-bin/www_bget?ko:K14432	Q6Z312	814	1.7e-85	bZIP transcription factor 23 OS=Oryza sativa subsp. japonica GN=BZIP23 PE=2 SV=1	PF00170//PF07716//PF03131	bZIP transcription factor//Basic region leucine zipper//bZIP Maf transcription factor	GO:0006355	regulation of transcription, DNA-templated	GO:0003700//GO:0043565//GO:0003677	transcription factor activity, sequence-specific DNA binding//sequence-specific DNA binding//DNA binding	GO:0005634//GO:0005667	nucleus//transcription factor complex	--	--
Cluster-342212.185849	1824	242059355	XP_002458823.1	625	1.2e-62	hypothetical protein SORBIDRAFT_03g040970 [Sorghum bicolor]>gi|241930798|gb|EES03943.1| hypothetical protein SORBIDRAFT_03g040970 [Sorghum bicolor]	1002231500	XM_015757418.1	191	6.31e-93	PREDICTED: Oryza sativa Japonica Group G-box-binding factor 4 (LOC4325078), mRNA	K14432	ABF	ABA responsive element binding factor	http://www.genome.jp/dbget-bin/www_bget?ko:K14432	P42777	218	2.6e-16	G-box-binding factor 4 OS=Arabidopsis thaliana GN=GBF4 PE=1 SV=1	PF03131//PF09429//PF07716//PF00170	bZIP Maf transcription factor//WW domain binding protein 11//Basic region leucine zipper//bZIP transcription factor	GO:0006355//GO:0006396	regulation of transcription, DNA-templated//RNA processing	GO:0003700//GO:0043565//GO:0003677	transcription factor activity, sequence-specific DNA binding//sequence-specific DNA binding//DNA binding	GO:0005634//GO:0005667	nucleus//transcription factor complex	--	--
Cluster-342212.174553	2062	242059355	XP_002458823.1	558	7.8e-55	hypothetical protein SORBIDRAFT_03g040970 [Sorghum bicolor]>gi|241930798|gb|EES03943.1| hypothetical protein SORBIDRAFT_03g040970 [Sorghum bicolor]	242059354	XM_002458778.1	343	2.28e-177	Sorghum bicolor hypothetical protein, mRNA	K14432	ABF	ABA responsive element binding factor	http://www.genome.jp/dbget-bin/www_bget?ko:K14432	P42777	194	1.8e-13	G-box-binding factor 4 OS=Arabidopsis thaliana GN=GBF4 PE=1 SV=1	PF03131//PF00170//PF07716	bZIP Maf transcription factor//bZIP transcription factor//Basic region leucine zipper	GO:0006355	regulation of transcription, DNA-templated	GO:0003700//GO:0043565//GO:0003677	transcription factor activity, sequence-specific DNA binding//sequence-specific DNA binding//DNA binding	GO:0005634//GO:0005667	nucleus//transcription factor complex	--	--
Cluster-342212.177438	2020	399163434	AFP33247.1	878	6e-92	ABA responsive element binding factor 1 [Sorghum bicolor]	955709045	XM_004953972.3	570	0	PREDICTED: Setaria italica ABSCISIC ACID-INSENSITIVE 5-like protein 7 (LOC101778442), mRNA	K14432	ABF	ABA responsive element binding factor	http://www.genome.jp/dbget-bin/www_bget?ko:K14432	Q6Z312	838	3.7e-88	bZIP transcription factor 23 OS=Oryza sativa subsp. japonica GN=BZIP23 PE=2 SV=1	PF14862//PF07716//PF00170//PF03131	Big defensin//Basic region leucine zipper//bZIP transcription factor//bZIP Maf transcription factor	GO:0050829//GO:0050830//GO:0006355	defense response to Gram-negative bacterium//defense response to Gram-positive bacterium//regulation of transcription, DNA-templated	GO:0043565//GO:0003677//GO:0003700	sequence-specific DNA binding//DNA binding//transcription factor activity, sequence-specific DNA binding	GO:0005634//GO:0005667	nucleus//transcription factor complex	--	--
Cluster-342212.145842	2536	388053	AAB59302.1	775	6.6e-80	alcohol dehydrogenase [Zea mays]	2444147	U91620.1	587	0	Eragrostis japonica alcohol dehydrogenase (Adh1) gene, partial cds	K18857	ADH1	alcohol dehydrogenase class-P	http://www.genome.jp/dbget-bin/www_bget?ko:K18857	P00333	747	1.6e-77	Alcohol dehydrogenase 1 OS=Zea mays GN=ADH1 PE=2 SV=1	PF08240//PF00107	Alcohol dehydrogenase GroES-like domain//Zinc-binding dehydrogenase	GO:0055114	oxidation-reduction process	--	--	--	--	KOG0022	Alcohol dehydrogenase, class III
Cluster-342212.145879	2863	414872675	DAA51232.1	1666	3.6e-183	TPA: alcohol dehydrogenase1 [Zea mays]	683419215	KM265177.1	780	0	Zoysia matrella hypothetical protein (ST7) mRNA, complete cds	K18857	ADH1	alcohol dehydrogenase class-P	http://www.genome.jp/dbget-bin/www_bget?ko:K18857	P14219	1636	1.5e-180	Alcohol dehydrogenase 1 OS=Pennisetum americanum GN=ADH1 PE=2 SV=1	PF08240//PF02826//PF02254//PF00107//PF03721	Alcohol dehydrogenase GroES-like domain//D-isomer specific 2-hydroxyacid dehydrogenase, NAD binding domain//TrkA-N domain//Zinc-binding dehydrogenase//UDP-glucose/GDP-mannose dehydrogenase family, NAD binding domain	GO:0006813//GO:0055114	potassium ion transport//oxidation-reduction process	GO:0016616//GO:0051287	oxidoreductase activity, acting on the CH-OH group of donors, NAD or NADP as acceptor//NAD binding	--	--	KOG0022	Alcohol dehydrogenase, class III
Cluster-342212.66304	1224	514714792	XP_004953086.1	653	4.4e-66	PREDICTED: apolipoprotein D-like [Setaria italica]	955709044	XM_004953029.3	316	1.37e-162	PREDICTED: Setaria italica temperature-induced lipocalin-1-like (LOC101785556), mRNA	K03098	APOD	apolipoprotein D and lipocalin family protein	http://www.genome.jp/dbget-bin/www_bget?ko:K03098	Q9FGT8	510	2.4e-50	Temperature-induced lipocalin-1 OS=Arabidopsis thaliana GN=TIL PE=1 SV=1	--	--	--	--	--	--	--	--	--	--
Cluster-342212.66302	1077	514714792	XP_004953086.1	957	2.2e-101	PREDICTED: apolipoprotein D-like [Setaria italica]	955709044	XM_004953029.3	464	0	PREDICTED: Setaria italica temperature-induced lipocalin-1-like (LOC101785556), mRNA	K03098	APOD	apolipoprotein D and lipocalin family protein	http://www.genome.jp/dbget-bin/www_bget?ko:K03098	Q9FGT8	746	9.1e-78	Temperature-induced lipocalin-1 OS=Arabidopsis thaliana GN=TIL PE=1 SV=1	--	--	--	--	--	--	--	--	--	--
Cluster-342212.125024	4830	514764770	XP_004965589.1	634	2.8e-63	PREDICTED: E3 ubiquitin-protein ligase CCNB1IP1 homolog isoform X2 [Setaria italica]	955707959	XM_012842959.2	386	0	PREDICTED: Setaria italica mitogen-activated protein kinase 13-like (LOC101767355), transcript variant X2, mRNA	K10639	CCNB1IP1, HEI10	E3 ubiquitin-protein ligase CCNP1IP1	http://www.genome.jp/dbget-bin/www_bget?ko:K10639	I6PL68	584	2.5e-58	E3 ubiquitin-protein ligase CCNB1IP1 homolog OS=Oryza sativa subsp. japonica GN=HEI10 PE=2 SV=1	PF06005//PF04977//PF14634//PF03938//PF03854//PF07714//PF00097//PF11744//PF00069//PF13639	Protein of unknown function (DUF904)//Septum formation initiator//zinc-RING finger domain//Outer membrane protein (OmpH-like)//P-11 zinc finger//Protein tyrosine kinase//Zinc finger, C3HC4 type (RING finger)//Aluminium activated malate transporter//Protein kinase domain//Ring finger domain	GO:0006468//GO:0007049//GO:0043093//GO:0015743//GO:0000917	protein phosphorylation//cell cycle//FtsZ-dependent cytokinesis//malate transport//barrier septum assembly	GO:0005524//GO:0004672//GO:0005515//GO:0051082//GO:0046872//GO:0008270//GO:0003723	ATP binding//protein kinase activity//protein binding//unfolded protein binding//metal ion binding//zinc ion binding//RNA binding	GO:0005737	cytoplasm	--	--
Cluster-342212.110337	3130	514764766	XP_004965588.1	1049	1.4e-111	PREDICTED: E3 ubiquitin-protein ligase CCNB1IP1 homolog isoform X1 [Setaria italica]	--	--	--	--	--	K10639	CCNB1IP1, HEI10	E3 ubiquitin-protein ligase CCNP1IP1	http://www.genome.jp/dbget-bin/www_bget?ko:K10639	I6PL68	933	5.5e-99	E3 ubiquitin-protein ligase CCNB1IP1 homolog OS=Oryza sativa subsp. japonica GN=HEI10 PE=2 SV=1	PF14634//PF02601//PF06858//PF00038//PF11744//PF04420//PF02183//PF06008//PF04111//PF00097//PF10186//PF03854//PF01496//PF06160//PF05929//PF06005//PF13639//PF07851	zinc-RING finger domain//Exonuclease VII, large subunit//Nucleolar GTP-binding protein 1 (NOG1)//Intermediate filament protein//Aluminium activated malate transporter//CHD5-like protein//Homeobox associated leucine zipper//Laminin Domain I//Autophagy protein Apg6//Zinc finger, C3HC4 type (RING finger)//Vacuolar sorting 38 and autophagy-related subunit 14//P-11 zinc finger//V-type ATPase 116kDa su…	GO:0043093//GO:0007165//GO:0030155//GO:0006914//GO:0010508//GO:0015992//GO:0000921//GO:0006308//GO:0015991//GO:0015743//GO:0030334//GO:0000917//GO:0019069//GO:0071816//GO:0045995//GO:0006355	FtsZ-dependent cytokinesis//signal transduction//regulation of cell adhesion//autophagy//positive regulation of autophagy//proton transport//septin ring assembly//DNA catabolic process//ATP hydrolysis coupled proton transport//malate transport//regulation of cell migration//barrier septum assembly//viral capsid assembly//tail-anchored membrane protein insertion into ER membrane//regulation of emb…	GO:0046872//GO:0008855//GO:0005198//GO:0003723//GO:0015078//GO:0005525//GO:0003700//GO:0043565//GO:0008270//GO:0005102//GO:0005515	metal ion binding//exodeoxyribonuclease VII activity//structural molecule activity//RNA binding//hydrogen ion transmembrane transporter activity//GTP binding//transcription factor activity, sequence-specific DNA binding//sequence-specific DNA binding//zinc ion binding//receptor binding//protein binding	GO:0005667//GO:0009318//GO:0005940//GO:0033179//GO:0005737//GO:0016021//GO:0005882	transcription factor complex//exodeoxyribonuclease VII complex//septin ring//proton-transporting V-type ATPase, V0 domain//cytoplasm//integral component of membrane//intermediate filament	--	--
Cluster-342212.94514	1636	115456239	NP_001051720.1	486	1.4e-46	Os03g0820500 [Oryza sativa Japonica Group]>gi|75243286|sp|Q84TB6.1|ADF3_ORYSJ RecName: Full=Actin-depolymerizing factor 3; Short=ADF-3; Short=OsADF3>gi|29124120|gb|AAO65861.1| putative actin-binding protein [Oryza sativa Japonica Group]>gi|108711792|gb|ABF99587.1| Actin-depolymerizing factor 4, putative, expressed [Oryza sativa Japonica Group]>gi|113550191|dbj|BAF13634.1| Os03g0820500 [Oryza sati…	1002848288	XM_006650742.2	180	7.36e-87	PREDICTED: Oryza brachyantha actin-depolymerizing factor 3 (LOC102710479), mRNA	K05765	CFL	cofilin	http://www.genome.jp/dbget-bin/www_bget?ko:K05765	Q84TB6	486	2e-47	Actin-depolymerizing factor 3 OS=Oryza sativa subsp. japonica GN=ADF3 PE=1 SV=1	PF00241	Cofilin/tropomyosin-type actin-binding protein	--	--	GO:0003779	actin binding	GO:0005622	intracellular	KOG1735	Actin depolymerizing factor
Cluster-342212.94515	1408	573926552	XP_006650805.1	645	4.3e-65	PREDICTED: actin-depolymerizing factor 3-like [Oryza brachyantha]	1002848288	XM_006650742.2	291	1.25e-148	PREDICTED: Oryza brachyantha actin-depolymerizing factor 3 (LOC102710479), mRNA	K05765	CFL	cofilin	http://www.genome.jp/dbget-bin/www_bget?ko:K05765	Q84TB6	627	7.5e-64	Actin-depolymerizing factor 3 OS=Oryza sativa subsp. japonica GN=ADF3 PE=1 SV=1	PF00241	Cofilin/tropomyosin-type actin-binding protein	--	--	GO:0003779	actin binding	GO:0005622	intracellular	KOG1735	Actin depolymerizing factor
Cluster-342212.69363	778	573926552	XP_006650805.1	646	1.8e-65	PREDICTED: actin-depolymerizing factor 3-like [Oryza brachyantha]	1002848288	XM_006650742.2	294	1.45e-150	PREDICTED: Oryza brachyantha actin-depolymerizing factor 3 (LOC102710479), mRNA	K05765	CFL	cofilin	http://www.genome.jp/dbget-bin/www_bget?ko:K05765	Q84TB6	628	3.2e-64	Actin-depolymerizing factor 3 OS=Oryza sativa subsp. japonica GN=ADF3 PE=1 SV=1	PF00241	Cofilin/tropomyosin-type actin-binding protein	--	--	GO:0003779	actin binding	GO:0005622	intracellular	KOG1735	Actin depolymerizing factor
Cluster-342212.67779	2141	514733104	XP_004957595.1	337	3.4e-29	PREDICTED: phytoene synthase 2, chloroplastic-like [Setaria italica]	835920827	XM_004957538.2	134	3.61e-61	PREDICTED: Setaria italica phytoene synthase 2, chloroplastic-like (LOC101756152), mRNA	K02291	crtB	phytoene synthase	http://www.genome.jp/dbget-bin/www_bget?ko:K02291	--	--	--	--	--	--	--	--	--	--	--	--	--	--
Cluster-342212.67775	2204	242050132	XP_002462810.1	1328	4.3e-144	hypothetical protein SORBIDRAFT_02g032370 [Sorghum bicolor]>gi|56785585|gb|AAW28997.1| chloroplast phytoene synthase 3 [Sorghum bicolor]>gi|241926187|gb|EER99331.1| hypothetical protein SORBIDRAFT_02g032370 [Sorghum bicolor]	835920827	XM_004957538.2	598	0	PREDICTED: Setaria italica phytoene synthase 2, chloroplastic-like (LOC101756152), mRNA	K02291	crtB	phytoene synthase	http://www.genome.jp/dbget-bin/www_bget?ko:K02291	Q52QW5	1074	1.7e-115	Phytoene synthase, chloroplastic OS=Oncidium hybrid cultivar GN=PSY PE=2 SV=1	PF00494	Squalene/phytoene synthase	GO:0009058	biosynthetic process	GO:0016740	transferase activity	--	--	--	--
Cluster-342212.67770	2761	514733104	XP_004957595.1	1021	2.1e-108	PREDICTED: phytoene synthase 2, chloroplastic-like [Setaria italica]	835920827	XM_004957538.2	450	0	PREDICTED: Setaria italica phytoene synthase 2, chloroplastic-like (LOC101756152), mRNA	K02291	crtB	phytoene synthase	http://www.genome.jp/dbget-bin/www_bget?ko:K02291	Q52QW5	935	2.8e-99	Phytoene synthase, chloroplastic OS=Oncidium hybrid cultivar GN=PSY PE=2 SV=1	PF00494	Squalene/phytoene synthase	GO:0009058	biosynthetic process	GO:0016740	transferase activity	--	--	--	--
Cluster-342212.91281	1553	242037127	XP_002465958.1	922	3.6e-97	hypothetical protein SORBIDRAFT_01g048860 [Sorghum bicolor]>gi|241919812|gb|EER92956.1| hypothetical protein SORBIDRAFT_01g048860 [Sorghum bicolor]	150171776	CU406212.1	511	0	Oryza rufipogon (W1943) cDNA clone: ORW1943C109B06, full insert sequence	K15746	crtZ	beta-carotene 3-hydroxylase	http://www.genome.jp/dbget-bin/www_bget?ko:K15746	B3SGL0	841	1.3e-88	Beta-carotene 3-hydroxylase, chloroplastic OS=Gentiana lutea GN=BHY PE=2 SV=1	PF04116	Fatty acid hydroxylase superfamily	GO:0016123//GO:0016119//GO:0006633//GO:0055114	xanthophyll biosynthetic process//carotene metabolic process//fatty acid biosynthetic process//oxidation-reduction process	GO:0005506//GO:0016491	iron ion binding//oxidoreductase activity	GO:0016021	integral component of membrane	--	--
Cluster-342212.188996	1529	242037127	XP_002465958.1	937	6.5e-99	hypothetical protein SORBIDRAFT_01g048860 [Sorghum bicolor]>gi|241919812|gb|EER92956.1| hypothetical protein SORBIDRAFT_01g048860 [Sorghum bicolor]	150171776	CU406212.1	521	0	Oryza rufipogon (W1943) cDNA clone: ORW1943C109B06, full insert sequence	K15746	crtZ	beta-carotene 3-hydroxylase	http://www.genome.jp/dbget-bin/www_bget?ko:K15746	B3SGL0	842	9.6e-89	Beta-carotene 3-hydroxylase, chloroplastic OS=Gentiana lutea GN=BHY PE=2 SV=1	PF04116	Fatty acid hydroxylase superfamily	GO:0016119//GO:0006633//GO:0055114//GO:0016123	carotene metabolic process//fatty acid biosynthetic process//oxidation-reduction process//xanthophyll biosynthetic process	GO:0005506//GO:0016491	iron ion binding//oxidoreductase activity	GO:0016021	integral component of membrane	--	--
Cluster-342212.188995	1429	242037127	XP_002465958.1	796	1.4e-82	hypothetical protein SORBIDRAFT_01g048860 [Sorghum bicolor]>gi|241919812|gb|EER92956.1| hypothetical protein SORBIDRAFT_01g048860 [Sorghum bicolor]	150171776	CU406212.1	439	0	Oryza rufipogon (W1943) cDNA clone: ORW1943C109B06, full insert sequence	K15746	crtZ	beta-carotene 3-hydroxylase	http://www.genome.jp/dbget-bin/www_bget?ko:K15746	B3SGL0	716	3.7e-74	Beta-carotene 3-hydroxylase, chloroplastic OS=Gentiana lutea GN=BHY PE=2 SV=1	PF04116	Fatty acid hydroxylase superfamily	GO:0016123//GO:0016119//GO:0006633//GO:0055114	xanthophyll biosynthetic process//carotene metabolic process//fatty acid biosynthetic process//oxidation-reduction process	GO:0005506//GO:0016491	iron ion binding//oxidoreductase activity	GO:0016021	integral component of membrane	--	--
Cluster-342212.141767	959	514805455	XP_004977588.1	579	1.3e-57	PREDICTED: peroxidase 4-like [Setaria italica]	836017049	XM_012848633.1	205	5.38e-101	PREDICTED: Setaria italica peroxidase 4-like (LOC101764963), transcript variant X2, mRNA	K00430	E1.11.1.7	peroxidase	http://www.genome.jp/dbget-bin/www_bget?ko:K00430	A7NY33	481	4.4e-47	Peroxidase 4 OS=Vitis vinifera GN=GSVIVT00023967001 PE=1 SV=1	PF03854//PF00141	P-11 zinc finger//Peroxidase	GO:0006979//GO:0055114//GO:0006804	response to oxidative stress//oxidation-reduction process//obsolete peroxidase reaction	GO:0003723//GO:0008270//GO:0020037//GO:0004601	RNA binding//zinc ion binding//heme binding//peroxidase activity	--	--	--	--
Cluster-342212.101818	3067	514810304	XP_004979963.1	2945	0	PREDICTED: stachyose synthase [Setaria italica]	514810303	XM_004979906.1	900	0	PREDICTED: Setaria italica stachyose synthase (LOC101754435), mRNA	K06611	E2.4.1.67	stachyose synthetase	http://www.genome.jp/dbget-bin/www_bget?ko:K06611	Q93XK2	2072	4.5e-231	Stachyose synthase OS=Pisum sativum GN=STS1 PE=1 SV=1	PF10461//PF15453	Peptidase S68//Protein incorporated later into Tight Junctions	GO:0006915//GO:0006974	apoptotic process//cellular response to DNA damage stimulus	--	--	GO:0005923	bicellular tight junction	--	--
Cluster-342212.182363	924	115450651	NP_001048926.1	495	7e-48	Os03g0141200 [Oryza sativa Japonica Group]>gi|108706110|gb|ABF93905.1| Beta-amylase, putative, expressed [Oryza sativa Japonica Group]>gi|113547397|dbj|BAF10840.1| Os03g0141200 [Oryza sativa Japonica Group]>gi|215697194|dbj|BAG91188.1| unnamed protein product [Oryza sativa Japonica Group]	932282751	CP012611.1	294	1.74e-150	Oryza sativa Indica Group cultivar RP Bio-226 chromosome 3 sequence	K01177	E3.2.1.2	beta-amylase	http://www.genome.jp/dbget-bin/www_bget?ko:K01177	Q9LIR6	329	1.8e-29	Beta-amylase 1, chloroplastic OS=Arabidopsis thaliana GN=BAM1 PE=1 SV=1	PF10741//PF01373	Type II secretion system (T2SS), protein M subtype b//Glycosyl hydrolase family 14	GO:0006858//GO:0000272//GO:0005985//GO:0005982	extracellular transport//polysaccharide catabolic process//sucrose metabolic process//starch metabolic process	GO:0016161//GO:0016798	beta-amylase activity//hydrolase activity, acting on glycosyl bonds	GO:0044424	intracellular part	--	--
Cluster-342212.99171	2341	573960572	XP_006662469.1	1851	1e-204	PREDICTED: uncharacterized protein LOC102702220 [Oryza brachyantha]	836018375	XM_004982697.2	745	0	PREDICTED: Setaria italica alpha-galactosidase-like (LOC101786040), mRNA	K07407	E3.2.1.22B, galA, rafA	alpha-galactosidase	http://www.genome.jp/dbget-bin/www_bget?ko:K07407	Q9FT97	1399	3.8e-153	Alpha-galactosidase 1 OS=Arabidopsis thaliana GN=AGAL1 PE=2 SV=1	PF16499//PF02065	Alpha galactosidase A//Melibiase	GO:0005975//GO:0046486//GO:0006012//GO:0001575	carbohydrate metabolic process//glycerolipid metabolic process//galactose metabolic process//globoside metabolic process	GO:0004553//GO:0004557	hydrolase activity, hydrolyzing O-glycosyl compounds//alpha-galactosidase activity	--	--	KOG2366	Alpha-D-galactosidase (melibiase)
Cluster-342212.54357	1007	525343497	NP_001266604.1	278	1.1e-22	DRE binding factor [Zea mays]>gi|195634603|gb|ACG36770.1| DRE binding factor [Zea mays]	514821413	XM_004985330.1	81	4.83e-32	PREDICTED: Setaria italica ethylene-responsive transcription factor RAP2-13-like (LOC101777576), mRNA	K09286	EREBP	EREBP-like factor	http://www.genome.jp/dbget-bin/www_bget?ko:K09286	--	--	--	--	--	--	--	--	--	--	--	--	--	--
Cluster-342212.91861	1132	125542727	EAY88866.1	389	1.7e-35	hypothetical protein OsI_10343 [Oryza sativa Indica Group]	514821413	XM_004985330.1	308	3.53e-158	PREDICTED: Setaria italica ethylene-responsive transcription factor RAP2-13-like (LOC101777576), mRNA	K09286	EREBP	EREBP-like factor	http://www.genome.jp/dbget-bin/www_bget?ko:K09286	Q8H1E4	150	1.2e-08	Ethylene-responsive transcription factor RAP2-4 OS=Arabidopsis thaliana GN=RAP2-4 PE=1 SV=1	PF00847	AP2 domain	GO:0006355	regulation of transcription, DNA-templated	GO:0003700	transcription factor activity, sequence-specific DNA binding	GO:0005667	transcription factor complex	--	--
Cluster-342212.147169	2073	242079101	XP_002444319.1	360	7.1e-32	hypothetical protein SORBIDRAFT_07g020090 [Sorghum bicolor]>gi|241940669|gb|EES13814.1| hypothetical protein SORBIDRAFT_07g020090 [Sorghum bicolor]	242079100	XM_002444274.1	180	9.37e-87	Sorghum bicolor hypothetical protein, mRNA	K09286	EREBP	EREBP-like factor	http://www.genome.jp/dbget-bin/www_bget?ko:K09286	Q9FJQ2	154	7.8e-09	Ethylene-responsive transcription factor ERF057 OS=Arabidopsis thaliana GN=ERF057 PE=2 SV=1	PF06459	Ryanodine Receptor TM 4-6	GO:0006874//GO:0006816	cellular calcium ion homeostasis//calcium ion transport	GO:0005219	ryanodine-sensitive calcium-release channel activity	GO:0005622//GO:0016021	intracellular//integral component of membrane	--	--
Cluster-342212.147170	817	525342668	NP_001266537.1	274	2.6e-22	DRE binding factor 1 [Zea mays]>gi|195626986|gb|ACG35323.1| DRE binding factor 1 [Zea mays]	835995419	XM_004973348.2	110	2.94e-48	PREDICTED: Setaria italica ethylene-responsive transcription factor RAP2-13-like (LOC101756399), mRNA	K09286	EREBP	EREBP-like factor	http://www.genome.jp/dbget-bin/www_bget?ko:K09286	--	--	--	--	PF08619//PF11593	Alkali metal cation/H+ antiporter Nha1 C terminus//Mediator complex subunit 3 fungal	GO:0006814//GO:0015992//GO:0006357//GO:0006885	sodium ion transport//proton transport//regulation of transcription from RNA polymerase II promoter//regulation of pH	GO:0015385//GO:0001104	sodium:proton antiporter activity//RNA polymerase II transcription cofactor activity	GO:0016020//GO:0016592	membrane//mediator complex	--	--
Cluster-342212.173934	2517	242087745	XP_002439705.1	2054	3.2e-228	hypothetical protein SORBIDRAFT_09g018630 [Sorghum bicolor]>gi|241944990|gb|EES18135.1| hypothetical protein SORBIDRAFT_09g018630 [Sorghum bicolor]	242087744	XM_002439660.1	845	0	Sorghum bicolor hypothetical protein, mRNA	K03265	ETF1, ERF1	peptide chain release factor subunit 1	http://www.genome.jp/dbget-bin/www_bget?ko:K03265	P35614	1844	1e-204	Eukaryotic peptide chain release factor subunit 1-3 OS=Arabidopsis thaliana GN=ERF1-3 PE=1 SV=1	PF02046//PF02100	Cytochrome c oxidase subunit VIa//Ornithine decarboxylase antizyme	GO:0006123//GO:0019467//GO:0015992//GO:0006449//GO:0006415	mitochondrial electron transport, cytochrome c to oxygen//ornithine catabolic process, by decarboxylation//proton transport//regulation of translational termination//translational termination	GO:0008073//GO:0004129//GO:0004857//GO:0016149	ornithine decarboxylase inhibitor activity//cytochrome-c oxidase activity//enzyme inhibitor activity//translation release factor activity, codon specific	GO:0005886//GO:0005751//GO:0005840//GO:0005737//GO:0045277//GO:0018444//GO:0005743	plasma membrane//mitochondrial respiratory chain complex IV//ribosome//cytoplasm//respiratory chain complex IV//translation release factor complex//mitochondrial inner membrane	KOG0688	Peptide chain release factor 1 (eRF1)
Cluster-342212.100251	2669	242087745	XP_002439705.1	2054	3.4e-228	hypothetical protein SORBIDRAFT_09g018630 [Sorghum bicolor]>gi|241944990|gb|EES18135.1| hypothetical protein SORBIDRAFT_09g018630 [Sorghum bicolor]	242087744	XM_002439660.1	846	0	Sorghum bicolor hypothetical protein, mRNA	K03265	ETF1, ERF1	peptide chain release factor subunit 1	http://www.genome.jp/dbget-bin/www_bget?ko:K03265	P35614	1844	1.1e-204	Eukaryotic peptide chain release factor subunit 1-3 OS=Arabidopsis thaliana GN=ERF1-3 PE=1 SV=1	PF02100	Ornithine decarboxylase antizyme	GO:0006415//GO:0019467//GO:0006449	translational termination//ornithine catabolic process, by decarboxylation//regulation of translational termination	GO:0016149//GO:0004857//GO:0008073	translation release factor activity, codon specific//enzyme inhibitor activity//ornithine decarboxylase inhibitor activity	GO:0018444//GO:0005737//GO:0005840//GO:0005886	translation release factor complex//cytoplasm//ribosome//plasma membrane	KOG0688	Peptide chain release factor 1 (eRF1)
Cluster-342212.183694	1845	514819771	XP_004984579.1	1493	2.6e-163	PREDICTED: galactinol synthase 2 [Setaria italica]	836029234	XM_004984522.2	609	0	PREDICTED: Setaria italica galactinol synthase 2 (LOC101769741), mRNA	K18819	GOLS	inositol 3-alpha-galactosyltransferase	http://www.genome.jp/dbget-bin/www_bget?ko:K18819	C7G304	1256	1.1e-136	Galactinol synthase 2 OS=Solanum lycopersicum GN=GOLS2 PE=2 SV=1	PF01501//PF00390//PF11051	Glycosyl transferase family 8//Malic enzyme, N-terminal domain//Mannosyltransferase putative	GO:0006090//GO:0015976//GO:0006099//GO:0055114//GO:0006486//GO:0006108	pyruvate metabolic process//carbon utilization//tricarboxylic acid cycle//oxidation-reduction process//protein glycosylation//malate metabolic process	GO:0016757//GO:0004471	transferase activity, transferring glycosyl groups//malate dehydrogenase (decarboxylating) (NAD+) activity	--	--	KOG1950	Glycosyl transferase, family 8 - glycogenin
Cluster-342212.78189	2522	571513774	XP_006596932.1	1582	1.7e-173	PREDICTED: peroxisomal glycolate oxidase isoform X1 [Glycine max]	241987091	AK334348.1	840	0	Triticum aestivum cDNA, clone: WT009_P05, cultivar: Chinese Spring	K11517	HAO	(S)-2-hydroxy-acid oxidase	http://www.genome.jp/dbget-bin/www_bget?ko:K11517	Q6YT73	1656	6.5e-183	Peroxisomal (S)-2-hydroxy-acid oxidase GLO5 OS=Oryza sativa subsp. japonica GN=GLO5 PE=2 SV=1	PF03060//PF00977//PF01645//PF01070//PF00478//PF02581//PF01180	Nitronate monooxygenase//Histidine biosynthesis protein//Conserved region in glutamate synthase//FMN-dependent dehydrogenase//IMP dehydrogenase / GMP reductase domain//Thiamine monophosphate synthase/TENI//Dihydroorotate dehydrogenase	GO:0006807//GO:0009228//GO:0000105//GO:0006537//GO:0055114	nitrogen compound metabolic process//thiamine biosynthetic process//histidine biosynthetic process//glutamate biosynthetic process//oxidation-reduction process	GO:0018580//GO:0004789//GO:0016638//GO:0016627//GO:0015930//GO:0003824//GO:0016491	nitronate monooxygenase activity//thiamine-phosphate diphosphorylase activity//oxidoreductase activity, acting on the CH-NH2 group of donors//oxidoreductase activity, acting on the CH-CH group of donors//glutamate synthase activity//catalytic activity//oxidoreductase activity	GO:0005737	cytoplasm	KOG0538	Glycolate oxidase
Cluster-342212.83312	2604	413938012	AFW72563.1	362	5.2e-32	putative homeobox DNA-binding and leucine zipper domain family protein [Zea mays]>gi|645169026|gb|AIB06019.1| HB transcription factor, partial [Zea mays]	242063097	XM_002452793.1	208	3.21e-102	Sorghum bicolor hypothetical protein, mRNA	K09338	HD-ZIP	homeobox-leucine zipper protein	http://www.genome.jp/dbget-bin/www_bget?ko:K09338	A2X7U1	335	1e-29	Homeobox-leucine zipper protein HOX24 OS=Oryza sativa subsp. indica GN=HOX24 PE=2 SV=2	PF01527//PF04977//PF07716//PF05920//PF04218//PF02183//PF00046	Transposase//Septum formation initiator//Basic region leucine zipper//Homeobox KN domain//CENP-B N-terminal DNA-binding domain//Homeobox associated leucine zipper//Homeobox domain	GO:0007049//GO:0006355//GO:0006313	cell cycle//regulation of transcription, DNA-templated//transposition, DNA-mediated	GO:0003677//GO:0003700//GO:0004803//GO:0043565	DNA binding//transcription factor activity, sequence-specific DNA binding//transposase activity//sequence-specific DNA binding	GO:0005667	transcription factor complex	--	--
Cluster-342212.75186	1546	514803025	XP_004976404.1	669	7.8e-68	PREDICTED: homeobox-leucine zipper protein HOX22-like [Setaria italica]	983779665	KT224376.1	427	0	Triticum aestivum cultivar RAC875 HDZipI-5 mRNA, complete cds	K09338	HD-ZIP	homeobox-leucine zipper protein	http://www.genome.jp/dbget-bin/www_bget?ko:K09338	Q7XUJ5	645	6.7e-66	Homeobox-leucine zipper protein HOX22 OS=Oryza sativa subsp. japonica GN=HOX22 PE=2 SV=2	PF17078//PF05920//PF06005//PF04977//PF02183//PF00046//PF04218	SWI5-dependent HO expression protein 3//Homeobox KN domain//Protein of unknown function (DUF904)//Septum formation initiator//Homeobox associated leucine zipper//Homeobox domain//CENP-B N-terminal DNA-binding domain	GO:0000917//GO:0048309//GO:0043093//GO:0007049//GO:0051028//GO:0006355	barrier septum assembly//endoplasmic reticulum inheritance//FtsZ-dependent cytokinesis//cell cycle//mRNA transport//regulation of transcription, DNA-templated	GO:0043565//GO:0003677//GO:0003700	sequence-specific DNA binding//DNA binding//transcription factor activity, sequence-specific DNA binding	GO:0005667//GO:0005737	transcription factor complex//cytoplasm	--	--
Cluster-342212.189975	1837	514803025	XP_004976404.1	677	1.1e-68	PREDICTED: homeobox-leucine zipper protein HOX22-like [Setaria italica]	835998253	XM_004976347.2	411	0	PREDICTED: Setaria italica homeobox-leucine zipper protein HOX22-like (LOC101784648), mRNA	K09338	HD-ZIP	homeobox-leucine zipper protein	http://www.genome.jp/dbget-bin/www_bget?ko:K09338	Q7XUJ5	650	2.1e-66	Homeobox-leucine zipper protein HOX22 OS=Oryza sativa subsp. japonica GN=HOX22 PE=2 SV=2	PF00046//PF13411//PF05920//PF17078//PF06005//PF01527//PF04977//PF02183//PF04218	Homeobox domain//MerR HTH family regulatory protein//Homeobox KN domain//SWI5-dependent HO expression protein 3//Protein of unknown function (DUF904)//Transposase//Septum formation initiator//Homeobox associated leucine zipper//CENP-B N-terminal DNA-binding domain	GO:0000917//GO:0006313//GO:0048309//GO:0007049//GO:0043093//GO:0051028//GO:0006355	barrier septum assembly//transposition, DNA-mediated//endoplasmic reticulum inheritance//cell cycle//FtsZ-dependent cytokinesis//mRNA transport//regulation of transcription, DNA-templated	GO:0043565//GO:0003677//GO:0003700//GO:0004803	sequence-specific DNA binding//DNA binding//transcription factor activity, sequence-specific DNA binding//transposase activity	GO:0005667//GO:0005737	transcription factor complex//cytoplasm	--	--
Cluster-342212.125025	1012	514764782	XP_004965592.1	283	3e-23	PREDICTED: heat stress transcription factor C-2b-like [Setaria italica]	242096123	XM_002438507.1	146	3.57e-68	Sorghum bicolor hypothetical protein, mRNA	K09419	HSFF	heat shock transcription factor, other eukaryote	http://www.genome.jp/dbget-bin/www_bget?ko:K09419	Q0DBL6	273	6e-23	Heat stress transcription factor C-2b OS=Oryza sativa subsp. japonica GN=HSFC2B PE=3 SV=1	PF00447	HSF-type DNA-binding	GO:0006355	regulation of transcription, DNA-templated	GO:0003700//GO:0043565	transcription factor activity, sequence-specific DNA binding//sequence-specific DNA binding	GO:0005634//GO:0005667	nucleus//transcription factor complex	KOG0627	Heat shock transcription factor
Cluster-342212.94396	3570	514781486	XP_004969854.1	779	3.2e-80	PREDICTED: heat stress transcription factor C-1b-like [Setaria italica]	835977988	XM_004969797.2	328	8.66e-169	PREDICTED: Setaria italica heat stress transcription factor C-1b-like (LOC101767343), mRNA	K09419	HSFF	heat shock transcription factor, other eukaryote	http://www.genome.jp/dbget-bin/www_bget?ko:K09419	Q942D6	735	5.7e-76	Heat stress transcription factor C-1b OS=Oryza sativa subsp. japonica GN=HSFC1B PE=2 SV=1	PF05296//PF00447//PF00435	Taste receptor protein (TAS2R)//HSF-type DNA-binding//Spectrin repeat	GO:0007186//GO:0006355//GO:0050909	G-protein coupled receptor signaling pathway//regulation of transcription, DNA-templated//sensory perception of taste	GO:0004930//GO:0003700//GO:0043565//GO:0005515	G-protein coupled receptor activity//transcription factor activity, sequence-specific DNA binding//sequence-specific DNA binding//protein binding	GO:0005667//GO:0016021//GO:0005634	transcription factor complex//integral component of membrane//nucleus	KOG0627	Heat shock transcription factor
Cluster-342212.55655	1135	514749133	XP_004961786.1	668	7.5e-68	PREDICTED: uncharacterized protein LOC101758756 [Setaria italica]	835946009	XM_004961729.2	303	2.13e-155	PREDICTED: Setaria italica UPF0098 protein CPn_0877/CP_0992/CPj0877/CpB0906 (LOC101758756), mRNA	K06910	K06910	uncharacterized protein	http://www.genome.jp/dbget-bin/www_bget?ko:K06910	O26373	275	4e-23	UPF0098 protein MTH_273 OS=Methanothermobacter thermautotrophicus (strain ATCC 29096 / DSM 1053 / JCM 10044 / NBRC 100330 / Delta H) GN=MTH_273 PE=3 SV=1	--	--	--	--	--	--	--	--	--	--
Cluster-342212.177149	1248	514717788	XP_004953828.1	591	7e-59	PREDICTED: protein ODORANT1-like [Setaria italica]	242062623	XM_002452556.1	212	9.07e-105	Sorghum bicolor hypothetical protein, mRNA	K09422	MYBP	myb proto-oncogene protein, plant	http://www.genome.jp/dbget-bin/www_bget?ko:K09422	Q50EX6	416	2e-39	Protein ODORANT1 OS=Petunia hybrida GN=ODO1 PE=2 SV=1	--	--	--	--	--	--	--	--	--	--
Cluster-342212.85074	1352	514717788	XP_004953828.1	369	4.2e-33	PREDICTED: protein ODORANT1-like [Setaria italica]	937901440	AP014958.1	148	3.72e-69	Oryza sativa Japonica Group DNA, chromosome 2, cultivar: Nipponbare, complete sequence	K09422	MYBP	myb proto-oncogene protein, plant	http://www.genome.jp/dbget-bin/www_bget?ko:K09422	Q50EX6	221	8.6e-17	Protein ODORANT1 OS=Petunia hybrida GN=ODO1 PE=2 SV=1	--	--	--	--	--	--	--	--	--	--
Cluster-342212.177154	1564	514717788	XP_004953828.1	716	2.8e-73	PREDICTED: protein ODORANT1-like [Setaria italica]	--	--	--	--	--	K09422	MYBP	myb proto-oncogene protein, plant	http://www.genome.jp/dbget-bin/www_bget?ko:K09422	Q50EX6	633	1.7e-64	Protein ODORANT1 OS=Petunia hybrida GN=ODO1 PE=2 SV=1	--	--	--	--	--	--	--	--	--	--
Cluster-342212.177151	2356	670366461	XP_008664663.1	356	2.4e-31	PREDICTED: myb-related protein 306-like isoform X1 [Zea mays]>gi|414870446|tpg|DAA49003.1| TPA: putative MYB DNA-binding domain superfamily protein [Zea mays]	--	--	--	--	--	K09422	MYBP	myb proto-oncogene protein, plant	http://www.genome.jp/dbget-bin/www_bget?ko:K09422	Q9SPG3	271	2.4e-22	Transcription factor MYB26 OS=Arabidopsis thaliana GN=MYB26 PE=2 SV=1	PF00360	Phytochrome region	GO:0018298//GO:0009584//GO:0006355	protein-chromophore linkage//detection of visible light//regulation of transcription, DNA-templated	--	--	--	--	--	--
Cluster-342212.190096	2531	514755111	XP_004963201.1	2106	3e-234	PREDICTED: 9-cis-epoxycarotenoid dioxygenase 1, chloroplastic [Setaria italica]	955716382	XM_004963144.3	741	0	PREDICTED: Setaria italica 9-cis-epoxycarotenoid dioxygenase 1, chloroplastic (LOC101770668), mRNA	K09840	NCED	9-cis-epoxycarotenoid dioxygenase	http://www.genome.jp/dbget-bin/www_bget?ko:K09840	O24592	2056	2.7e-229	9-cis-epoxycarotenoid dioxygenase 1, chloroplastic OS=Zea mays GN=VP14 PE=1 SV=2	PF12906	RING-variant domain	--	--	GO:0008270	zinc ion binding	--	--	--	--
Cluster-342212.190094	2605	559100101	AHA94921.1	2513	2e-281	viviparous 14 [Sorghum bicolor]>gi|559100103|gb|AHA94922.1| viviparous 14 [Sorghum bicolor]	393692794	JQ314108.1	1028	0	Saccharum hybrid cultivar GuiTang 21 putative 9-cis-epoxycarotenoid dioxygenase mRNA, complete cds	K09840	NCED	9-cis-epoxycarotenoid dioxygenase	http://www.genome.jp/dbget-bin/www_bget?ko:K09840	O24592	2502	5.3e-281	9-cis-epoxycarotenoid dioxygenase 1, chloroplastic OS=Zea mays GN=VP14 PE=1 SV=2	PF12906	RING-variant domain	--	--	GO:0008270	zinc ion binding	--	--	--	--
Cluster-342212.143450	2422	573940240	XP_006652526.1	327	5.6e-28	PREDICTED: probable aquaporin PIP2-3-like [Oryza brachyantha]	391417830	BT087305.2	115	1.49e-50	Zea mays full-length cDNA clone ZM_BFb0033I07 mRNA, complete cds	K09872	PIP	aquaporin PIP	http://www.genome.jp/dbget-bin/www_bget?ko:K09872	Q7XUA6	327	7.9e-29	Probable aquaporin PIP2-3 OS=Oryza sativa subsp. japonica GN=PIP2-3 PE=2 SV=1	PF00230	Major intrinsic protein	GO:0006810	transport	GO:0005215	transporter activity	GO:0016020	membrane	KOG0223	Aquaporin (major intrinsic protein family)
Cluster-342212.143432	2440	573940240	XP_006652526.1	331	1.9e-28	PREDICTED: probable aquaporin PIP2-3-like [Oryza brachyantha]	391417830	BT087305.2	115	1.5e-50	Zea mays full-length cDNA clone ZM_BFb0033I07 mRNA, complete cds	K09872	PIP	aquaporin PIP	http://www.genome.jp/dbget-bin/www_bget?ko:K09872	Q7XUA6	331	2.7e-29	Probable aquaporin PIP2-3 OS=Oryza sativa subsp. japonica GN=PIP2-3 PE=2 SV=1	PF00230	Major intrinsic protein	GO:0006810	transport	GO:0005215	transporter activity	GO:0016020	membrane	KOG0223	Aquaporin (major intrinsic protein family)
Cluster-342212.143461	1029	514726991	XP_004956115.1	859	4.9e-90	PREDICTED: aquaporin PIP2-6-like [Setaria italica]	242048369	XM_002461886.1	379	0	Sorghum bicolor hypothetical protein, mRNA	K09872	PIP	aquaporin PIP	http://www.genome.jp/dbget-bin/www_bget?ko:K09872	Q9ATM5	851	5.8e-90	Aquaporin PIP2-6 OS=Zea mays GN=PIP2-6 PE=2 SV=1	PF00230	Major intrinsic protein	GO:0006810	transport	GO:0005215	transporter activity	GO:0016020	membrane	KOG0223	Aquaporin (major intrinsic protein family)
Cluster-342212.189194	1696	514784298	XP_004970557.1	1372	2.6e-149	PREDICTED: probable protein phosphatase 2C 9 [Setaria italica]	242054956	XM_002456579.1	633	0	Sorghum bicolor hypothetical protein, mRNA	K14497	PP2C	protein phosphatase 2C	http://www.genome.jp/dbget-bin/www_bget?ko:K14497	Q5N9N2	1222	9.2e-133	Probable protein phosphatase 2C 9 OS=Oryza sativa subsp. japonica GN=Os01g0846300 PE=2 SV=1	PF00481//PF15324	Protein phosphatase 2C//Hedgehog signalling target	GO:0007224	smoothened signaling pathway	GO:0003824	catalytic activity	--	--	KOG0698	Serine/threonine protein phosphatase
Cluster-342212.215338	2335	514749493	XP_004961872.1	1296	2.3e-140	PREDICTED: probable protein phosphatase 2C 49 [Setaria italica]	1002267747	XM_015782710.1	439	0	PREDICTED: Oryza sativa Japonica Group probable protein phosphatase 2C 49 (LOC9270549), mRNA	K14497	PP2C	protein phosphatase 2C	http://www.genome.jp/dbget-bin/www_bget?ko:K14497	Q65XG6	1199	5.9e-130	Probable protein phosphatase 2C 49 OS=Oryza sativa subsp. japonica GN=Os05g0457200 PE=3 SV=1	PF00481	Protein phosphatase 2C	--	--	GO:0003824	catalytic activity	--	--	KOG0698	Serine/threonine protein phosphatase
Cluster-342212.213227	2459	514749493	XP_004961872.1	891	2.3e-93	PREDICTED: probable protein phosphatase 2C 49 [Setaria italica]	1002856023	XM_015837421.1	287	3.68e-146	PREDICTED: Oryza brachyantha probable protein phosphatase 2C 49 (LOC102710788), mRNA	K14497	PP2C	protein phosphatase 2C	http://www.genome.jp/dbget-bin/www_bget?ko:K14497	Q65XG6	840	2.6e-88	Probable protein phosphatase 2C 49 OS=Oryza sativa subsp. japonica GN=Os05g0457200 PE=3 SV=1	PF00481	Protein phosphatase 2C	--	--	GO:0003824	catalytic activity	--	--	KOG0698	Serine/threonine protein phosphatase
Cluster-342212.128535	1712	218188781	EEC71208.1	577	4e-57	hypothetical protein OsI_03122 [Oryza sativa Indica Group]	195658548	EU976624.1	223	9.62e-111	Zea mays clone 985461 mRNA sequence	K14497	PP2C	protein phosphatase 2C	http://www.genome.jp/dbget-bin/www_bget?ko:K14497	Q5SN75	563	2.4e-56	Probable protein phosphatase 2C 8 OS=Oryza sativa subsp. japonica GN=Os01g0656200 PE=2 SV=1	PF00481	Protein phosphatase 2C	--	--	GO:0003824	catalytic activity	--	--	KOG0698	Serine/threonine protein phosphatase
Cluster-342212.104087	771	357135769	XP_003569481.1	593	2.5e-59	PREDICTED: probable protein phosphatase 2C 8 [Brachypodium distachyon]	670389763	XM_008677042.1	238	1.94e-119	PREDICTED: Zea mays probable protein phosphatase 2C 8 (LOC100273512), mRNA	K14497	PP2C	protein phosphatase 2C	http://www.genome.jp/dbget-bin/www_bget?ko:K14497	Q5SN75	604	1.9e-61	Probable protein phosphatase 2C 8 OS=Oryza sativa subsp. japonica GN=Os01g0656200 PE=2 SV=1	PF00481	Protein phosphatase 2C	--	--	GO:0003824	catalytic activity	--	--	KOG0698	Serine/threonine protein phosphatase
Cluster-342212.179172	2756	514779689	XP_004969414.1	1537	3.1e-168	PREDICTED: probable protein phosphatase 2C 6 [Setaria italica]	--	--	--	--	--	K14497	PP2C	protein phosphatase 2C	http://www.genome.jp/dbget-bin/www_bget?ko:K14497	Q0JLP9	1424	5.6e-156	Probable protein phosphatase 2C 6 OS=Oryza sativa subsp. japonica GN=Os01g0583100 PE=1 SV=1	PF00481	Protein phosphatase 2C	--	--	GO:0003824	catalytic activity	--	--	KOG0698	Serine/threonine protein phosphatase
Cluster-342212.107246	1822	414885029	DAA61043.1	988	9.5e-105	TPA: putative protein phosphatase 2C family protein [Zea mays]>gi|645166244|gb|AIB04841.1| orphans transcription factor, partial [Zea mays]>gi|666937420|gb|AIG52096.1| 2C-type protein phosphatase protein [Zea mays]	--	--	--	--	--	K14497	PP2C	protein phosphatase 2C	http://www.genome.jp/dbget-bin/www_bget?ko:K14497	Q0J2L7	949	4.5e-101	Probable protein phosphatase 2C 68 OS=Oryza sativa subsp. japonica GN=Os09g0325700 PE=2 SV=2	PF00481	Protein phosphatase 2C	--	--	GO:0003824	catalytic activity	--	--	KOG0698	Serine/threonine protein phosphatase
Cluster-342212.179171	2578	514779689	XP_004969414.1	1480	1.2e-161	PREDICTED: probable protein phosphatase 2C 6 [Setaria italica]	955719778	XM_004969357.2	1008	0	PREDICTED: Setaria italica probable protein phosphatase 2C 6 (LOC101763688), mRNA	K14497	PP2C	protein phosphatase 2C	http://www.genome.jp/dbget-bin/www_bget?ko:K14497	Q0JLP9	1389	6e-152	Probable protein phosphatase 2C 6 OS=Oryza sativa subsp. japonica GN=Os01g0583100 PE=1 SV=1	PF00481//PF03391	Protein phosphatase 2C//Nepovirus coat protein, central domain	--	--	GO:0003824//GO:0005198	catalytic activity//structural molecule activity	GO:0019028	viral capsid	KOG0698	Serine/threonine protein phosphatase
Cluster-342212.189191	3304	675294837	NP_001288588.1	1356	3.7e-147	probable protein phosphatase 2C 9 [Zea mays]>gi|413951964|gb|AFW84613.1| putative protein phosphatase 2C family protein [Zea mays]>gi|645168607|gb|AIB05843.1| orphans transcription factor, partial [Zea mays]>gi|666937436|gb|AIG52104.1| 2C-type protein phosphatase protein [Zea mays]	926573238	KJ855133.2	610	0	Zea mays 2C-type protein phosphatase protein (PP2C6) mRNA, complete cds	K14497	PP2C	protein phosphatase 2C	http://www.genome.jp/dbget-bin/www_bget?ko:K14497	Q5N9N2	1210	4.4e-131	Probable protein phosphatase 2C 9 OS=Oryza sativa subsp. japonica GN=Os01g0846300 PE=2 SV=1	PF00481//PF00494//PF16358	Protein phosphatase 2C//Squalene/phytoene synthase//RcsF lipoprotein	GO:0009058//GO:0035556	biosynthetic process//intracellular signal transduction	GO:0003824//GO:0016740	catalytic activity//transferase activity	GO:0009279	cell outer membrane	KOG0698	Serine/threonine protein phosphatase
Cluster-342212.71047	2005	242036201	XP_002465495.1	1297	1.5e-140	hypothetical protein SORBIDRAFT_01g039890 [Sorghum bicolor]>gi|241919349|gb|EER92493.1| hypothetical protein SORBIDRAFT_01g039890 [Sorghum bicolor]	836018091	XM_004984868.2	673	0	PREDICTED: Setaria italica probable protein phosphatase 2C 30 (LOC101766228), mRNA	K14497	PP2C	protein phosphatase 2C	http://www.genome.jp/dbget-bin/www_bget?ko:K14497	Q84JI0	1145	9.2e-124	Probable protein phosphatase 2C 30 OS=Oryza sativa subsp. japonica GN=Os03g0268600 PE=2 SV=1	PF00481	Protein phosphatase 2C	GO:0009628//GO:0006950//GO:0009738//GO:0006470	response to abiotic stimulus//response to stress//abscisic acid-activated signaling pathway//protein dephosphorylation	GO:0004721//GO:0003824	phosphoprotein phosphatase activity//catalytic activity	--	--	KOG0698	Serine/threonine protein phosphatase
Cluster-342212.71046	1479	242036201	XP_002465495.1	1282	6.2e-139	hypothetical protein SORBIDRAFT_01g039890 [Sorghum bicolor]>gi|241919349|gb|EER92493.1| hypothetical protein SORBIDRAFT_01g039890 [Sorghum bicolor]	836018091	XM_004984868.2	668	0	PREDICTED: Setaria italica probable protein phosphatase 2C 30 (LOC101766228), mRNA	K14497	PP2C	protein phosphatase 2C	http://www.genome.jp/dbget-bin/www_bget?ko:K14497	Q84JI0	1154	6.1e-125	Probable protein phosphatase 2C 30 OS=Oryza sativa subsp. japonica GN=Os03g0268600 PE=2 SV=1	PF00481	Protein phosphatase 2C	GO:0009628//GO:0006950//GO:0009738//GO:0006470	response to abiotic stimulus//response to stress//abscisic acid-activated signaling pathway//protein dephosphorylation	GO:0004721//GO:0003824	phosphoprotein phosphatase activity//catalytic activity	--	--	KOG0698	Serine/threonine protein phosphatase
Cluster-342212.189198	3876	666937404	AIG52088.1	1085	1.1e-115	2C-type protein phosphatase protein [Zea mays]	242054956	XM_002456579.1	423	0	Sorghum bicolor hypothetical protein, mRNA	K14497	PP2C	protein phosphatase 2C	http://www.genome.jp/dbget-bin/www_bget?ko:K14497	Q5N9N2	853	1.3e-89	Probable protein phosphatase 2C 9 OS=Oryza sativa subsp. japonica GN=Os01g0846300 PE=2 SV=1	PF15324//PF00481//PF00494//PF16358	Hedgehog signalling target//Protein phosphatase 2C//Squalene/phytoene synthase//RcsF lipoprotein	GO:0035556//GO:0009058//GO:0007224	intracellular signal transduction//biosynthetic process//smoothened signaling pathway	GO:0016740//GO:0003824	transferase activity//catalytic activity	GO:0009279	cell outer membrane	KOG0698	Serine/threonine protein phosphatase
Cluster-342212.189195	1893	242054957	XP_002456624.1	1062	2.6e-113	hypothetical protein SORBIDRAFT_03g039630 [Sorghum bicolor]>gi|241928599|gb|EES01744.1| hypothetical protein SORBIDRAFT_03g039630 [Sorghum bicolor]	955718668	XM_004970500.3	508	0	PREDICTED: Setaria italica probable protein phosphatase 2C 9 (LOC101768564), mRNA	K14497	PP2C	protein phosphatase 2C	http://www.genome.jp/dbget-bin/www_bget?ko:K14497	Q5N9N2	974	5.9e-104	Probable protein phosphatase 2C 9 OS=Oryza sativa subsp. japonica GN=Os01g0846300 PE=2 SV=1	PF00481	Protein phosphatase 2C	GO:0009737//GO:0044763//GO:0050794	response to abscisic acid//single-organism cellular process//regulation of cellular process	GO:0016787//GO:0003824	hydrolase activity//catalytic activity	--	--	KOG0698	Serine/threonine protein phosphatase
Cluster-342212.56322	625	514766998	XP_004966135.1	714	1.9e-73	PREDICTED: probable protein phosphatase 2C 59 [Setaria italica]	1002278740	XM_015788200.1	270	2.53e-137	PREDICTED: Oryza sativa Japonica Group probable protein phosphatase 2C 59 (LOC4341949), mRNA	K17506	PPM1L, PP2CE	protein phosphatase 1L	http://www.genome.jp/dbget-bin/www_bget?ko:K17506	Q5Z6F5	714	2.7e-74	Probable protein phosphatase 2C 59 OS=Oryza sativa subsp. japonica GN=Os06g0698300 PE=2 SV=1	PF00481	Protein phosphatase 2C	--	--	GO:0003824	catalytic activity	--	--	KOG0698	Serine/threonine protein phosphatase
Cluster-342212.15047	662	514766998	XP_004966135.1	444	4.1e-42	PREDICTED: probable protein phosphatase 2C 59 [Setaria italica]	--	--	--	--	--	K17506	PPM1L, PP2CE	protein phosphatase 1L	http://www.genome.jp/dbget-bin/www_bget?ko:K17506	Q5Z6F5	432	1.4e-41	Probable protein phosphatase 2C 59 OS=Oryza sativa subsp. japonica GN=Os06g0698300 PE=2 SV=1	PF00481	Protein phosphatase 2C	--	--	GO:0003824	catalytic activity	--	--	--	--
Cluster-342212.186592	762	573948251	XP_006656432.1	719	6.2e-74	PREDICTED: probable protein phosphatase 2C 59-like [Oryza brachyantha]	955717888	XM_004966078.3	292	1.84e-149	PREDICTED: Setaria italica probable protein phosphatase 2C 59 (LOC101770287), mRNA	K17506	PPM1L, PP2CE	protein phosphatase 1L	http://www.genome.jp/dbget-bin/www_bget?ko:K17506	Q5Z6F5	718	1.1e-74	Probable protein phosphatase 2C 59 OS=Oryza sativa subsp. japonica GN=Os06g0698300 PE=2 SV=1	PF00481//PF06470	Protein phosphatase 2C//SMC proteins Flexible Hinge Domain	GO:0051276	chromosome organization	GO:0005515//GO:0003824//GO:0005524	protein binding//catalytic activity//ATP binding	GO:0005694	chromosome	KOG0698	Serine/threonine protein phosphatase
Cluster-342212.48827	1342	514796853	XP_004973652.1	513	8.3e-50	PREDICTED: protein HVA22-like isoform X1 [Setaria italica]	242079440	XM_002444444.1	211	3.51e-104	Sorghum bicolor hypothetical protein, mRNA	K17279	REEP5_6	receptor expression-enhancing protein 5/6	http://www.genome.jp/dbget-bin/www_bget?ko:K17279	Q07764	447	5.3e-43	Protein HVA22 OS=Hordeum vulgare GN=HVA22 PE=2 SV=1	--	--	--	--	--	--	--	--	KOG1725	Protein involved in membrane traffic (YOP1/TB2/DP1/HVA22 family)
Cluster-342212.48828	1253	514796853	XP_004973652.1	559	3.6e-55	PREDICTED: protein HVA22-like isoform X1 [Setaria italica]	242079440	XM_002444444.1	230	8.98e-115	Sorghum bicolor hypothetical protein, mRNA	K17279	REEP5_6	receptor expression-enhancing protein 5/6	http://www.genome.jp/dbget-bin/www_bget?ko:K17279	Q07764	493	2.3e-48	Protein HVA22 OS=Hordeum vulgare GN=HVA22 PE=2 SV=1	--	--	--	--	--	--	--	--	KOG1725	Protein involved in membrane traffic (YOP1/TB2/DP1/HVA22 family)
Cluster-342212.48830	912	514796853	XP_004973652.1	616	6.5e-62	PREDICTED: protein HVA22-like isoform X1 [Setaria italica]	835992090	XM_004973595.2	268	4.86e-136	PREDICTED: Setaria italica protein HVA22-like (LOC101759240), transcript variant X1, mRNA	K17279	REEP5_6	receptor expression-enhancing protein 5/6	http://www.genome.jp/dbget-bin/www_bget?ko:K17279	Q07764	563	1.3e-56	Protein HVA22 OS=Hordeum vulgare GN=HVA22 PE=2 SV=1	--	--	--	--	--	--	--	--	KOG1725	Protein involved in membrane traffic (YOP1/TB2/DP1/HVA22 family)
Cluster-342212.161327	1530	514808970	XP_004979316.1	611	4.1e-61	PREDICTED: HVA22-like protein e [Setaria italica]	242068502	XM_002449483.1	339	2.81e-175	Sorghum bicolor hypothetical protein, mRNA	K17279	REEP5_6	receptor expression-enhancing protein 5/6	http://www.genome.jp/dbget-bin/www_bget?ko:K17279	Q07764	460	1.9e-44	Protein HVA22 OS=Hordeum vulgare GN=HVA22 PE=2 SV=1	--	--	--	--	--	--	--	--	KOG1725	Protein involved in membrane traffic (YOP1/TB2/DP1/HVA22 family)
Cluster-342212.48829	1130	514796853	XP_004973652.1	641	1e-64	PREDICTED: protein HVA22-like isoform X1 [Setaria italica]	835992090	XM_004973595.2	267	2.18e-135	PREDICTED: Setaria italica protein HVA22-like (LOC101759240), transcript variant X1, mRNA	K17279	REEP5_6	receptor expression-enhancing protein 5/6	http://www.genome.jp/dbget-bin/www_bget?ko:K17279	Q07764	569	3.2e-57	Protein HVA22 OS=Hordeum vulgare GN=HVA22 PE=2 SV=1	--	--	--	--	--	--	--	--	KOG1725	Protein involved in membrane traffic (YOP1/TB2/DP1/HVA22 family)
Cluster-342212.148950	2820	7024415	CAB75882.1	2304	3.7e-257	sucrose transporter 1 [Hordeum vulgare subsp. vulgare]	20152874	AF408844.1	930	0	Triticum aestivum sucrose transporter SUT1D mRNA, complete cds	K15378	SLC45A1_2_4	solute carrier family 45, member 1/2/4	http://www.genome.jp/dbget-bin/www_bget?ko:K15378	Q9LKH3	2203	2.7e-246	Sucrose transport protein SUT1 OS=Oryza sativa subsp. indica GN=SUT1 PE=3 SV=1	PF01213	Adenylate cyclase associated (CAP) N terminal	GO:0007010	cytoskeleton organization	GO:0003779	actin binding	--	--	KOG0637	Sucrose transporter and related proteins
Cluster-342212.147484	2728	7024415	CAB75882.1	2346	4.8e-262	sucrose transporter 1 [Hordeum vulgare subsp. vulgare]	32128875	BT009324.1	1086	0	Triticum aestivum clone wlm24.pk0015.g11:fis, full insert mRNA sequence	K15378	SLC45A1_2_4	solute carrier family 45, member 1/2/4	http://www.genome.jp/dbget-bin/www_bget?ko:K15378	Q10R54	2244	4.6e-251	Sucrose transport protein SUT1 OS=Oryza sativa subsp. japonica GN=SUT1 PE=1 SV=1	PF01213	Adenylate cyclase associated (CAP) N terminal	GO:0007010	cytoskeleton organization	GO:0003779	actin binding	--	--	KOG0637	Sucrose transporter and related proteins
Cluster-342212.204773	2307	514819480	XP_004984436.1	519	2.9e-50	PREDICTED: bidirectional sugar transporter SWEET16-like [Setaria italica]	955723521	XM_004984379.3	284	1.6e-144	PREDICTED: Setaria italica bidirectional sugar transporter SWEET16-like (LOC101782544), mRNA	K15382	SLC50A, SWEET	solute carrier family 50 (sugar transporter)	http://www.genome.jp/dbget-bin/www_bget?ko:K15382	Q10LN5	491	7.3e-48	Bidirectional sugar transporter SWEET16 OS=Oryza sativa subsp. japonica GN=SWEET16 PE=3 SV=1	PF03083//PF02109	Sugar efflux transporter for intercellular exchange//DAD family	GO:0018279	protein N-linked glycosylation via asparagine	GO:0004579	dolichyl-diphosphooligosaccharide-protein glycotransferase activity	GO:0016021//GO:0008250	integral component of membrane//oligosaccharyltransferase complex	--	--
Cluster-342212.133579	811	288300152	ADC45379.1	445	3.9e-42	S-adenosylmethionine decarboxylase [Cleistogenes songorica]	288300151	FJ972823.1	533	0	Cleistogenes songorica S-adenosylmethionine decarboxylase (SAMDC) mRNA, complete cds	K01611	speD, AMD1	S-adenosylmethionine decarboxylase	http://www.genome.jp/dbget-bin/www_bget?ko:K01611	Q0JC10	410	6.3e-39	S-adenosylmethionine decarboxylase proenzyme OS=Oryza sativa subsp. japonica GN=SAMDC PE=2 SV=1	PF01536	Adenosylmethionine decarboxylase	GO:0008295//GO:0006560//GO:0006525//GO:0006597	spermidine biosynthetic process//proline metabolic process//arginine metabolic process//spermine biosynthetic process	GO:0004014	adenosylmethionine decarboxylase activity	--	--	KOG0788	S-adenosylmethionine decarboxylase
Cluster-342212.133581	2368	288300152	ADC45379.1	1383	1.9e-150	S-adenosylmethionine decarboxylase [Cleistogenes songorica]	288300151	FJ972823.1	647	0	Cleistogenes songorica S-adenosylmethionine decarboxylase (SAMDC) mRNA, complete cds	K01611	speD, AMD1	S-adenosylmethionine decarboxylase	http://www.genome.jp/dbget-bin/www_bget?ko:K01611	Q0JC10	1149	3.7e-124	S-adenosylmethionine decarboxylase proenzyme OS=Oryza sativa subsp. japonica GN=SAMDC PE=2 SV=1	PF02675//PF00856//PF01536	S-adenosylmethionine decarboxylase//SET domain//Adenosylmethionine decarboxylase	GO:0006597//GO:0006525//GO:0006560//GO:0008295	spermine biosynthetic process//arginine metabolic process//proline metabolic process//spermidine biosynthetic process	GO:0005515//GO:0004014	protein binding//adenosylmethionine decarboxylase activity	--	--	KOG0788	S-adenosylmethionine decarboxylase
Cluster-342212.107914	3034	189308765	ACD87085.1	1270	3.1e-137	spermidine synthase 3 [Oryza sativa Japonica Group]	955718239	XM_004965460.3	586	0	PREDICTED: Setaria italica spermine synthase-like (LOC101761225), transcript variant X2, mRNA	K00797	speE, SRM	spermidine synthase	http://www.genome.jp/dbget-bin/www_bget?ko:K00797	Q94BN2	1098	3.9e-118	Spermine synthase OS=Arabidopsis thaliana GN=SPMS PE=1 SV=1	PF05175//PF05430//PF08241//PF02390	Methyltransferase small domain//S-adenosyl-L-methionine-dependent methyltransferase//Methyltransferase domain//Putative methyltransferase	GO:0008033//GO:0055114//GO:0008152//GO:0006400//GO:0009451	tRNA processing//oxidation-reduction process//metabolic process//tRNA modification//RNA modification	GO:0016645//GO:0008168//GO:0008176	oxidoreductase activity, acting on the CH-NH group of donors//methyltransferase activity//tRNA (guanine-N7-)-methyltransferase activity	--	--	KOG1562	Spermidine synthase

## Sheet: DOWN-REGULATED
Genes	Gene Length	NR GI	NR ID	NR Score	NR Evalue	NR Description	NT GI	NT ID	NT Score	NT Evalue	NT Description	KO ID	KO Name	KO Description	Http Link	Swissprot ID	Swissprot Score	Swissprot Evalue	Swissprot Description	PFAM ID	PFAM description	Gene Ontology Biological Pathway	BP Description	Gene Ontology Molecular Function	MF Description	Gene Ontology Cellular Component	CC Description	KOG ID	KOG Description
Cluster-342212.52998	752	--	--	--	--	--	--	--	--	--	--	--	--	--	--	--	--	--	--	PF02935	Cytochrome c oxidase subunit VIIc	GO:0015992//GO:0006123	proton transport//mitochondrial electron transport, cytochrome c to oxygen	GO:0004129	cytochrome-c oxidase activity	GO:0045277	respiratory chain complex IV	--	--
Cluster-342212.219606	1180	544217756	XP_005539022.1	1080	1.3e-115	eukaryotic translation elongation factor 2 [Cyanidioschyzon merolae strain 10D]>gi|29539334|dbj|BAC67668.1| elongation factor-2 [Cyanidioschyzon merolae]>gi|449019584|dbj|BAM82986.1| eukaryotic translation elongation factor 2 [Cyanidioschyzon merolae strain 10D]	290983673	XM_002674507.1	331	6.03526e-171	Naegleria gruberi translation elongation factor 2, mRNA	K03234	EEF2	elongation factor 2	http://www.genome.jp/dbget-bin/www_bget?ko:K03234	Q875S0	1075	7.1e-116	Elongation factor 2 OS=Lachancea kluyveri (strain ATCC 58438 / CBS 3082 / CCRC 21498 / NBRC 1685 / JCM 7257 / NCYC 543 / NRRL Y-12651) GN=EFT2 PE=3 SV=1	PF01926//PF01131	50S ribosome-binding GTPase//DNA topoisomerase	GO:0006265	DNA topological change	GO:0003916//GO:0005525//GO:0097159//GO:1901363//GO:0003677	DNA topoisomerase activity//GTP binding//organic cyclic compound binding//heterocyclic compound binding//DNA binding	--	--	KOG0469	Elongation factor 2
Cluster-342212.115146	1945	--	--	--	--	--	--	--	--	--	--	--	--	--	--	--	--	--	--	--	--	--	--	--	--	--	--	--	--
Cluster-335750.0	3211	397642070	EJK75009.1	360	1.1e-31	hypothetical protein THAOC_03280 [Thalassiosira oceanica]	--	--	--	--	--	K04640	GNA	guanine nucleotide-binding protein subunit alpha, other	http://www.genome.jp/dbget-bin/www_bget?ko:K04640	O13055	388	8.9e-36	Guanine nucleotide-binding protein G(i) subunit alpha-2 OS=Oryzias latipes GN=gnai2 PE=2 SV=3	PF03193//PF00646//PF00025//PF00503//PF12937	Protein of unknown function, DUF258//F-box domain//ADP-ribosylation factor family//G-protein alpha subunit//F-box-like	GO:0007186//GO:0007165	G-protein coupled receptor signaling pathway//signal transduction	GO:0019001//GO:0005525//GO:0031683//GO:0005515//GO:0003924//GO:0004871	guanyl nucleotide binding//GTP binding//G-protein beta/gamma-subunit complex binding//protein binding//GTPase activity//signal transducer activity	--	--	KOG0082	G-protein alpha subunit (small G protein superfamily)
Cluster-138144.0	452	--	--	--	--	--	--	--	--	--	--	--	--	--	--	--	--	--	--	--	--	--	--	--	--	--	--	--	--
Cluster-342212.23297	1585	18406	CAA78364.1	696	6e-71	cytoskeletal protein [Euglena gracilis]>gi|255354|gb|AAB23241.1| 86 kda articulin=major membrane skeletal protein [Euglena gracilis, Peptide, 650 aa]	--	--	--	--	--	--	--	--	--	--	--	--	--	--	--	--	--	--	--	--	--	--	--
Cluster-342212.103858	3415	545702981	XP_005703818.1	2030	2.6e-225	molecular chaperone DnaK [Galdieria sulphuraria]>gi|452820253|gb|EME27298.1| molecular chaperone DnaK [Galdieria sulphuraria]	170036375	XM_001845988.1	295	1.83161e-150	Culex quinquefasciatus conserved hypothetical protein, mRNA	K04043	dnaK	molecular chaperone DnaK	http://www.genome.jp/dbget-bin/www_bget?ko:K04043	P29845	2318	1.5e-259	Heat shock 70 kDa protein cognate 5 OS=Drosophila melanogaster GN=Hsc70-5 PE=1 SV=2	PF08650//PF06399//PF02212//PF02782//PF00589//PF06723	DASH complex subunit Dad4//GTP cyclohydrolase I feedback regulatory protein (GFRP)//Dynamin GTPase effector domain//FGGY family of carbohydrate kinases, C-terminal domain//Phage integrase family//MreB/Mbl protein	GO:0009890//GO:0000902//GO:0005975//GO:0015074//GO:0008608//GO:0006310	negative regulation of biosynthetic process//cell morphogenesis//carbohydrate metabolic process//DNA integration//attachment of spindle microtubules to kinetochore//DNA recombination	GO:0005525//GO:0016773//GO:0003677//GO:0003924	GTP binding//phosphotransferase activity, alcohol group as acceptor//DNA binding//GTPase activity	GO:0042729//GO:0072686	DASH complex//mitotic spindle	KOG0102	Molecular chaperones mortalin/PBP74/GRP75, HSP70 superfamily
Cluster-298432.0	2155	302813006	XP_002988189.1	800	7.1e-83	hypothetical protein SELMODRAFT_127648 [Selaginella moellendorffii]>gi|300143921|gb|EFJ10608.1| hypothetical protein SELMODRAFT_127648 [Selaginella moellendorffii]	--	--	--	--	--	--	--	--	--	M1CZC0	723	8.5e-75	ERBB-3 BINDING PROTEIN 1 OS=Solanum tuberosum GN=EBP1 PE=2 SV=1	PF00642	Zinc finger C-x8-C-x5-C-x3-H type (and similar)	--	--	GO:0046872	metal ion binding	--	--	KOG2776	Metallopeptidase
Cluster-342212.30995	5547	743784126	XP_011021544.1	468	5.7e-44	PREDICTED: coiled-coil domain-containing protein 130-like [Populus euphratica]	299749706	XM_001836228.2	112	1.6003e-48	Coprinopsis cinerea okayama7#130 ### hypothetical protein, mRNA	K13115	CCDC130	coiled-coil domain-containing protein 130	http://www.genome.jp/dbget-bin/www_bget?ko:K13115	Q7K0F0	502	9.3e-49	Coiled-coil domain-containing protein 130 homolog OS=Drosophila melanogaster GN=CG15084 PE=2 SV=1	PF01749//PF01388//PF05397	Importin beta binding domain//ARID/BRIGHT DNA binding domain//Mediator complex subunit 15	GO:0015031//GO:0006606//GO:0006357	protein transport//protein import into nucleus//regulation of transcription from RNA polymerase II promoter	GO:0001104//GO:0008565//GO:0003677	RNA polymerase II transcription cofactor activity//protein transporter activity//DNA binding	GO:0005634//GO:0016592//GO:0005737	nucleus//mediator complex//cytoplasm	KOG2990	C2C2-type Zn-finger protein
Cluster-293534.0	1550	226498524	NP_001141169.1	475	2.5e-45	uncharacterized protein LOC100273255 [Zea mays]>gi|40352787|gb|AAH64656.1| Ak3 protein [Rattus norvegicus]>gi|149062660|gb|EDM13083.1| adenylate kinase 3 [Rattus norvegicus]>gi|194703052|gb|ACF85610.1| unknown [Zea mays]	--	--	--	--	--	K00939	adk, AK	adenylate kinase	http://www.genome.jp/dbget-bin/www_bget?ko:K00939	Q9WTP7	482	5.4e-47	GTP:AMP phosphotransferase AK3, mitochondrial OS=Mus musculus GN=Ak3 PE=1 SV=3	PF08241//PF06414//PF05891//PF05191//PF00891	Methyltransferase domain//Zeta toxin//AdoMet dependent proline di-methyltransferase//Adenylate kinase, active site lid//O-methyltransferase	GO:0006144//GO:0006756//GO:0046034//GO:0042594//GO:0008152//GO:0006172//GO:0006480//GO:0021549//GO:0007517//GO:0051260//GO:0046060//GO:0021772//GO:0001889	purine nucleobase metabolic process//AMP phosphorylation//ATP metabolic process//response to starvation//metabolic process//ADP biosynthetic process//N-terminal protein amino acid methylation//cerebellum development//muscle organ development//protein homooligomerization//dATP metabolic process//olfactory bulb development//liver development	GO:0008171//GO:0042802//GO:0016301//GO:0008168//GO:0004017//GO:0005524	O-methyltransferase activity//identical protein binding//kinase activity//methyltransferase activity//adenylate kinase activity//ATP binding	GO:0005759//GO:0005758	mitochondrial matrix//mitochondrial intermembrane space	KOG3078	Adenylate kinase
Cluster-241342.1	1699	--	--	--	--	--	--	--	--	--	--	--	--	--	--	--	--	--	--	PF13417//PF02798//PF13409	Glutathione S-transferase, N-terminal domain//Glutathione S-transferase, N-terminal domain//Glutathione S-transferase, N-terminal domain	--	--	GO:0005515	protein binding	--	--	--	--
Cluster-342212.85433	991	302833677	XP_002948402.1	1107	8.2e-119	component of cytosolic 80S ribosome and 60S large subunit [Volvox carteri f. nagariensis]>gi|300266622|gb|EFJ50809.1| component of cytosolic 80S ribosome and 60S large subunit [Volvox carteri f. nagariensis]	731910979	KM588129.1	102	1.00771e-43	Ornithogalum longebracteatum 60S ribosomal protein L3 (RPL3-1) mRNA, complete cds	K02925	RP-L3e, RPL3	large subunit ribosomal protein L3e	http://www.genome.jp/dbget-bin/www_bget?ko:K02925	P39023	1060	3.3e-114	60S ribosomal protein L3 OS=Homo sapiens GN=RPL3 PE=1 SV=2	PF00297	Ribosomal protein L3	GO:0042254//GO:0006412	ribosome biogenesis//translation	GO:0003735	structural constituent of ribosome	GO:0005622//GO:0030529//GO:0005840	intracellular//intracellular ribonucleoprotein complex//ribosome	KOG0746	60S ribosomal protein L3 and related proteins
Cluster-152949.0	1130	--	--	--	--	--	--	--	--	--	--	--	--	--	--	--	--	--	--	PF02487//PF02932//PF05297//PF06305//PF15048//PF02535	CLN3 protein//Neurotransmitter-gated ion-channel transmembrane region//Herpesvirus latent membrane protein 1 (LMP1)//Protein of unknown function (DUF1049)//Organic solute transporter subunit beta protein//ZIP Zinc transporter	GO:0006811//GO:0015721//GO:0030001//GO:0055085//GO:0006810//GO:0019087	ion transport//bile acid and bile salt transport//metal ion transport//transmembrane transport//transport//transformation of host cell by virus	GO:0005215//GO:0046873//GO:0046982	transporter activity//metal ion transmembrane transporter activity//protein heterodimerization activity	GO:0005887//GO:0016020//GO:0016021//GO:0005886	integral component of plasma membrane//membrane//integral component of membrane//plasma membrane	--	--
Cluster-183943.0	581	--	--	--	--	--	--	--	--	--	--	--	--	--	--	--	--	--	--	PF06070	Herpesvirus large structural phosphoprotein UL32	--	--	GO:0005198	structural molecule activity	--	--	--	--
Cluster-342212.166986	415	--	--	--	--	--	--	--	--	--	--	--	--	--	--	--	--	--	--	--	--	--	--	--	--	--	--	--	--
Cluster-345972.0	1627	--	--	--	--	--	--	--	--	--	--	--	--	--	--	--	--	--	--	--	--	--	--	--	--	--	--	--	--
Cluster-342212.43880	253	--	--	--	--	--	551672873	XM_005839136.1	110	8.27573e-49	Guillardia theta CCMP2712 hypothetical protein (GUITHDRAFT_150720) mRNA, complete cds	--	--	--	--	--	--	--	--	--	--	--	--	--	--	--	--	--	--
Cluster-342212.107475	608	317134945	ADV03035.1	332	3.7e-29	ribosomal protein L18A [Karlodinium veneficum]	--	--	--	--	--	K02882	RP-L18Ae, RPL18A	large subunit ribosomal protein L18Ae	http://www.genome.jp/dbget-bin/www_bget?ko:K02882	Q8L7K0	322	7.5e-29	60S ribosomal protein L18a-1 OS=Arabidopsis thaliana GN=RPL18AA PE=2 SV=1	PF04739//PF01775	5'-AMP-activated protein kinase beta subunit, interaction domain//Ribosomal L18ae/LX protein domain	GO:0006412//GO:0042254	translation//ribosome biogenesis	GO:0005515//GO:0003735	protein binding//structural constituent of ribosome	GO:0005840	ribosome	KOG0829	60S ribosomal protein L18A
Cluster-264572.0	1409	813106633	XP_012194322.1	1285	2.7e-139	hypothetical protein SPRG_00710 [Saprolegnia parasitica CBS 223.65]>gi|641540885|gb|KDO34648.1| hypothetical protein SPRG_00710 [Saprolegnia parasitica CBS 223.65]	--	--	--	--	--	K14455	GOT2	aspartate aminotransferase, mitochondrial	http://www.genome.jp/dbget-bin/www_bget?ko:K14455	P05202	1252	2.5e-136	Aspartate aminotransferase, mitochondrial OS=Mus musculus GN=Got2 PE=1 SV=1	PF00155	Aminotransferase class I and II	GO:0009058	biosynthetic process	GO:0030170	pyridoxal phosphate binding	--	--	KOG1411	Aspartate aminotransferase/Glutamic oxaloacetic transaminase AAT1/GOT2
Cluster-342212.20209	932	18404	CAA78363.1	346	1.3e-30	cytoskeletal protein [Euglena gracilis]	--	--	--	--	--	--	--	--	--	--	--	--	--	PF05920	Homeobox KN domain	GO:0006355	regulation of transcription, DNA-templated	GO:0003677	DNA binding	--	--	--	--
Cluster-342212.141232	389	--	--	--	--	--	--	--	--	--	--	--	--	--	--	--	--	--	--	--	--	--	--	--	--	--	--	--	--
Cluster-97464.5	1562	731376831	XP_010667688.1	404	4.2e-37	PREDICTED: cytochrome P450 71A4-like [Beta vulgaris subsp. vulgaris]	--	--	--	--	--	--	--	--	--	O13345	577	5.2e-58	O-methylsterigmatocystin oxidoreductase OS=Aspergillus parasiticus (strain ATCC 56775 / NRRL 5862 / SRRC 143 / SU-1) GN=aflQ PE=1 SV=1	PF00067	Cytochrome P450	GO:0055114	oxidation-reduction process	GO:0020037//GO:0005506//GO:0016705	heme binding//iron ion binding//oxidoreductase activity, acting on paired donors, with incorporation or reduction of molecular oxygen	--	--	KOG0156	Cytochrome P450 CYP2 subfamily
Cluster-264926.0	2576	326526723	BAK00750.1	2007	9.3e-223	predicted protein [Hordeum vulgare subsp. vulgare]	--	--	--	--	--	--	--	--	--	Q5EAJ7	2079	5.9e-232	Major vault protein OS=Strongylocentrotus purpuratus GN=MVP PE=1 SV=1	PF00514	Armadillo/beta-catenin-like repeat	--	--	GO:0005515	protein binding	--	--	--	--
Cluster-342212.155067	1402	567956807	ETK82424.1	737	9.3e-76	calmodulin, partial [Phytophthora parasitica]	768435121	XM_011560690.1	238	3.59811e-119	PREDICTED: Plutella xylostella calmodulin (LOC105389559), mRNA	K02183	CALM	calmodulin	http://www.genome.jp/dbget-bin/www_bget?ko:K02183	P62152	758	4.8e-79	Calmodulin OS=Drosophila melanogaster GN=Cam PE=1 SV=2	PF03874//PF12763//PF13499//PF00036//PF07425//PF13202//PF13405//PF13833//PF10591//PF02627//PF02563	RNA polymerase Rpb4//Cytoskeletal-regulatory complex EF hand//EF-hand domain pair//EF hand//Pardaxin//EF hand//EF-hand domain//EF-hand domain pair//Secreted protein acidic and rich in cysteine Ca binding region//Carboxymuconolactone decarboxylase family//Polysaccharide biosynthesis/export protein	GO:0055114//GO:0006351//GO:0007165//GO:0006206//GO:0015774//GO:0006144	oxidation-reduction process//transcription, DNA-templated//signal transduction//pyrimidine nucleobase metabolic process//polysaccharide transport//purine nucleobase metabolic process	GO:0051920//GO:0003899//GO:0005509//GO:0015159//GO:0005515	peroxiredoxin activity//DNA-directed RNA polymerase activity//calcium ion binding//polysaccharide transmembrane transporter activity//protein binding	GO:0005576//GO:0005578//GO:0016020//GO:0005730	extracellular region//proteinaceous extracellular matrix//membrane//nucleolus	KOG0027	Calmodulin and related proteins (EF-Hand superfamily)
Cluster-342212.82564	677	--	--	--	--	--	--	--	--	--	--	--	--	--	--	--	--	--	--	--	--	--	--	--	--	--	--	--	--
Cluster-295218.1	1420	--	--	--	--	--	--	--	--	--	--	--	--	--	--	--	--	--	--	PF11421	ATP synthase F1 beta subunit	GO:0006754	ATP biosynthetic process	GO:0005524//GO:0016887	ATP binding//ATPase activity	GO:0000275	mitochondrial proton-transporting ATP synthase complex, catalytic core F(1)	--	--
Cluster-342212.177233	919	219109904	XP_002176705.1	225	1.4e-16	predicted protein [Phaeodactylum tricornutum CCAP 1055/1]>gi|217411240|gb|EEC51168.1| predicted protein [Phaeodactylum tricornutum CCAP 1055/1]	428015215	CP003600.1	40	2.72256e-09	Chamaesiphon minutus PCC 6605, complete genome	K15730	PTGES3	cytosolic prostaglandin-E synthase	http://www.genome.jp/dbget-bin/www_bget?ko:K15730	Q23280	236	1.1e-18	Co-chaperone protein daf-41 OS=Caenorhabditis elegans GN=daf-41 PE=2 SV=1	PF08430	Forkhead N-terminal region	--	--	GO:0019904//GO:0008134	protein domain specific binding//transcription factor binding	GO:0005667	transcription factor complex	KOG3158	HSP90 co-chaperone p23
Cluster-342212.232832	6200	--	--	--	--	--	--	--	--	--	--	--	--	--	--	Q9UTM5	146	2e-07	Uncharacterized protein C1420.01c OS=Schizosaccharomyces pombe (strain 972 / ATCC 24843) GN=SPAC1420.01c PE=4 SV=2	PF00391//PF05757//PF07174	PEP-utilising enzyme, mobile domain//Oxygen evolving enhancer protein 3 (PsbQ)//Fibronectin-attachment protein (FAP)	GO:0016310//GO:0015979	phosphorylation//photosynthesis	GO:0005509//GO:0050840//GO:0016772	calcium ion binding//extracellular matrix binding//transferase activity, transferring phosphorus-containing groups	GO:0009654//GO:0009523//GO:0019898//GO:0005576	photosystem II oxygen evolving complex//photosystem II//extrinsic component of membrane//extracellular region	--	--
Cluster-342212.234290	4785	--	--	--	--	--	--	--	--	--	--	--	--	--	--	--	--	--	--	PF02892	BED zinc finger	--	--	GO:0003677	DNA binding	--	--	--	--
Cluster-342212.234867	2175	--	--	--	--	--	--	--	--	--	--	--	--	--	--	--	--	--	--	PF00003	7 transmembrane sweet-taste receptor of 3 GCPR	GO:0007186	G-protein coupled receptor signaling pathway	GO:0004930	G-protein coupled receptor activity	GO:0016021	integral component of membrane	--	--
Cluster-342212.12900	935	545707098	XP_005705864.1	178	4.1e-11	mitochondrial protein translocase, MPT family [Galdieria sulphuraria]>gi|452822324|gb|EME29344.1| mitochondrial protein translocase, MPT family [Galdieria sulphuraria]	758188494	XM_011318326.1	36	4.63817e-07	Fusarium graminearum PH-1 hypothetical protein partial mRNA	K17778	TIM10	mitochondrial import inner membrane translocase subunit TIM10	http://www.genome.jp/dbget-bin/www_bget?ko:K17778	P0CR99	231	4.1e-18	Mitochondrial import inner membrane translocase subunit TIM10 OS=Cryptococcus neoformans var. neoformans serotype D (strain B-3501A) GN=TIM10 PE=3 SV=1	--	--	--	--	--	--	--	--	KOG3480	Mitochondrial import inner membrane translocase, subunits TIM10/TIM12
Cluster-247664.2	642	168061957	XP_001782951.1	753	5.9e-78	predicted protein [Physcomitrella patens]>gi|162665569|gb|EDQ52249.1| predicted protein [Physcomitrella patens]	302695006	XM_003037136.1	117	2.93679e-52	Schizophyllum commune H4-8 ADP/ATP carrier protein, partial mRNA	K05863	SLC25A4S, ANT	solute carrier family 25 (mitochondrial adenine nucleotide translocator), member 4/5/6/31	http://www.genome.jp/dbget-bin/www_bget?ko:K05863	P04709	732	2.3e-76	ADP,ATP carrier protein 1, mitochondrial OS=Zea mays GN=ANT1 PE=2 SV=3	--	--	GO:0006810//GO:0055085	transport//transmembrane transport	GO:0005215	transporter activity	GO:0005743//GO:0016021	mitochondrial inner membrane//integral component of membrane	KOG0749	Mitochondrial ADP/ATP carrier proteins
Cluster-342212.159380	1721	802565321	XP_012067472.1	1990	5.8e-221	PREDICTED: heat shock cognate 70 kDa protein-like [Jatropha curcas]>gi|643735310|gb|KDP41951.1| hypothetical protein JCGZ_26969 [Jatropha curcas]	339898758	XM_001470288.2	487	0	Leishmania infantum JPCM5 putative heat-shock protein hsp70 partial mRNA	K03283	HSPA1_8	heat shock 70kDa protein 1/8	http://www.genome.jp/dbget-bin/www_bget?ko:K03283	Q07437	2044	4.5e-228	Heat shock 70 kDa protein OS=Leishmania amazonensis GN=HSP70 PE=2 SV=1	PF04647//PF02782//PF06723	Accessory gene regulator B//FGGY family of carbohydrate kinases, C-terminal domain//MreB/Mbl protein	GO:0005975//GO:0009405//GO:0009372//GO:0000902	carbohydrate metabolic process//pathogenesis//quorum sensing//cell morphogenesis	GO:0016773//GO:0008233	phosphotransferase activity, alcohol group as acceptor//peptidase activity	GO:0016021	integral component of membrane	KOG0101	Molecular chaperones HSP70/HSC70, HSP70 superfamily
Cluster-342212.235897	1381	255086151	XP_002509042.1	783	4.2e-81	predicted protein [Micromonas sp. RCC299]>gi|226524320|gb|ACO70300.1| predicted protein [Micromonas sp. RCC299]	936700232	XM_014372595.1	105	3.04539e-45	PREDICTED: Trichogramma pretiosum dihydropyrimidinase (LOC106653227), transcript variant X3, mRNA	K01464	DPYS, dht, hydA	dihydropyrimidinase	http://www.genome.jp/dbget-bin/www_bget?ko:K01464	Q63150	1151	1.3e-124	Dihydropyrimidinase OS=Rattus norvegicus GN=Dpys PE=1 SV=2	PF01979	Amidohydrolase family	--	--	GO:0016787	hydrolase activity	--	--	KOG2584	Dihydroorotase and related enzymes
Cluster-342212.92571	2255	--	--	--	--	--	--	--	--	--	--	--	--	--	--	--	--	--	--	PF02480	Alphaherpesvirus glycoprotein E	--	--	--	--	GO:0016020	membrane	--	--
Cluster-342212.88316	2436	302792797	XP_002978164.1	916	2.8e-96	hypothetical protein SELMODRAFT_176646 [Selaginella moellendorffii]>gi|300154185|gb|EFJ20821.1| hypothetical protein SELMODRAFT_176646 [Selaginella moellendorffii]	--	--	--	--	--	K01230	MAN1	mannosyl-oligosaccharide alpha-1,2-mannosidase	http://www.genome.jp/dbget-bin/www_bget?ko:K01230	Q8J0Q0	966	6.4e-103	Mannosyl-oligosaccharide 1,2-alpha-mannosidase OS=Candida albicans GN=MNS1 PE=3 SV=2	PF01532	Glycosyl hydrolase family 47	GO:0005975	carbohydrate metabolic process	GO:0005509//GO:0004571	calcium ion binding//mannosyl-oligosaccharide 1,2-alpha-mannosidase activity	GO:0016020	membrane	KOG2431	1, 2-alpha-mannosidase
Cluster-177984.0	1674	694452645	XP_009351222.1	1477	1.7e-161	PREDICTED: cell division control protein 3-like [Pyrus x bretschneideri]	299755337	XM_001828547.2	658	0	Coprinopsis cinerea okayama7#130 ### septin AspB, mRNA	--	--	--	--	P39826	1197	7.2e-130	Cell division control protein 3 OS=Candida albicans GN=CDC3 PE=3 SV=1	PF08477//PF00071//PF01926//PF02800//PF00005//PF04548//PF00735//PF03193//PF02601	Ras of Complex, Roc, domain of DAPkinase//Ras family//50S ribosome-binding GTPase//Glyceraldehyde 3-phosphate dehydrogenase, C-terminal domain//ABC transporter//AIG1 family//Septin//Protein of unknown function, DUF258//Exonuclease VII, large subunit	GO:0055114//GO:0007264//GO:0006308	oxidation-reduction process//small GTPase mediated signal transduction//DNA catabolic process	GO:0005525//GO:0016620//GO:0005524//GO:0008855//GO:0016887//GO:0003924	GTP binding//oxidoreductase activity, acting on the aldehyde or oxo group of donors, NAD or NADP as acceptor//ATP binding//exodeoxyribonuclease VII activity//ATPase activity//GTPase activity	GO:0009318	exodeoxyribonuclease VII complex	KOG2655	Septin family protein (P-loop GTPase)
Cluster-342212.47023	462	698775660	XP_009820874.1	348	3.9e-31	histone [Aphanomyces astaci]>gi|574122999|gb|ETV88474.1| histone [Aphanomyces astaci]	--	--	--	--	--	K11253	H3	histone H3	http://www.genome.jp/dbget-bin/www_bget?ko:K11253	Q5MYA4	343	2.1e-31	Histone H3.2 OS=Cichorium intybus PE=2 SV=3	PF02291//PF00125	Transcription initiation factor IID, 31kD subunit//Core histone H2A/H2B/H3/H4	GO:0006352	DNA-templated transcription, initiation	GO:0003677	DNA binding	--	--	KOG1745	Histones H3 and H4
Cluster-355998.2	1098	--	--	--	--	--	--	--	--	--	--	--	--	--	--	--	--	--	--	--	--	--	--	--	--	--	--	--	--
Cluster-342212.89657	2234	--	--	--	--	--	--	--	--	--	--	--	--	--	--	--	--	--	--	--	--	--	--	--	--	--	--	--	--
Cluster-342212.110889	3520	145340597	XP_001415408.1	2246	2.4e-250	P-ATPase family transporter: sodium/potassium ion [Ostreococcus lucimarinus CCE9901]>gi|144575631|gb|ABO93700.1| P-ATPase family transporter: sodium/potassium ion [Ostreococcus lucimarinus CCE9901]	157131372	XM_001662168.1	567	0	Aedes aegypti AAEL012062-RA partial mRNA	K01539	ATP1A	sodium/potassium-transporting ATPase subunit alpha	http://www.genome.jp/dbget-bin/www_bget?ko:K01539	P13607	3828	0	Sodium/potassium-transporting ATPase subunit alpha OS=Drosophila melanogaster GN=Atpalpha PE=1 SV=3	PF01545//PF00122	Cation efflux family//E1-E2 ATPase	GO:0006812//GO:0055085//GO:0006810	cation transport//transmembrane transport//transport	GO:0003824//GO:0008324//GO:0046872//GO:0000166	catalytic activity//cation transmembrane transporter activity//metal ion binding//nucleotide binding	GO:0016021	integral component of membrane	KOG0203	Na+/K+ ATPase, alpha subunit
Cluster-342212.29131	538	168001703	XP_001753554.1	389	8e-36	predicted protein [Physcomitrella patens]>gi|162695433|gb|EDQ81777.1| predicted protein [Physcomitrella patens]	290998346	XM_002681696.1	63	2.54001e-22	Naegleria gruberi predicted protein, mRNA	K03094	SKP1, CBF3D	S-phase kinase-associated protein 1	http://www.genome.jp/dbget-bin/www_bget?ko:K03094	Q557E4	510	1.1e-50	SCF ubiquitin ligase complex protein SKP1b OS=Dictyostelium discoideum GN=fpaB-1 PE=1 SV=1	PF01466//PF03931	Skp1 family, dimerisation domain//Skp1 family, tetramerisation domain	GO:0006511	ubiquitin-dependent protein catabolic process	--	--	--	--	KOG1724	SCF ubiquitin ligase, Skp1 component
Cluster-342212.112547	752	--	--	--	--	--	--	--	--	--	--	--	--	--	--	--	--	--	--	--	--	--	--	--	--	--	--	--	--
Cluster-342212.64945	693	219116831	XP_002179210.1	381	8.7e-35	histone H2B isoform 1b [Phaeodactylum tricornutum CCAP 1055/1]>gi|219117513|ref|XP_002179551.1| histone H2B isoform 1a [Phaeodactylum tricornutum CCAP 1055/1]>gi|217409101|gb|EEC49033.1| histone H2B isoform 1b [Phaeodactylum tricornutum CCAP 1055/1]>gi|217409442|gb|EEC49374.1| histone H2B isoform 1a [Phaeodactylum tricornutum CCAP 1055/1]	1005939267	XM_015926821.1	61	4.29619e-21	PREDICTED: Tetranychus urticae histone H2B-like (LOC107360201), mRNA	K11252	H2B	histone H2B	http://www.genome.jp/dbget-bin/www_bget?ko:K11252	P07794	376	4.7e-35	Late histone H2B.2.1 OS=Psammechinus miliaris PE=3 SV=2	PF15510//PF03847//PF00125	Centromere kinetochore component W//Transcription initiation factor TFIID subunit A//Core histone H2A/H2B/H3/H4	GO:0007067//GO:0006352//GO:0051382	mitotic nuclear division//DNA-templated transcription, initiation//kinetochore assembly	GO:0003677//GO:0005488	DNA binding//binding	GO:0005694//GO:0005669	chromosome//transcription factor TFIID complex	KOG1744	Histone H2B
Cluster-342212.80985	548	--	--	--	--	--	--	--	--	--	--	--	--	--	--	--	--	--	--	PF03616//PF12090//PF03153//PF01080//PF05843//PF00771//PF09606//PF02487//PF05091	Sodium/glutamate symporter//Spt20 family//Transcription factor IIA, alpha/beta subunit//Presenilin//Suppressor of forked protein (Suf)//FHIPEP family//ARC105 or Med15 subunit of Mediator complex non-fungal//CLN3 protein//Eukaryotic translation initiation factor 3 subunit 7 (eIF-3)	GO:0006397//GO:0015813//GO:0006367//GO:0006446//GO:0015846//GO:0006357//GO:0009306//GO:0006814	mRNA processing//L-glutamate transport//transcription initiation from RNA polymerase II promoter//regulation of translational initiation//polyamine transport//regulation of transcription from RNA polymerase II promoter//protein secretion//sodium ion transport	GO:0004190//GO:0003743//GO:0015501//GO:0003712//GO:0001104	aspartic-type endopeptidase activity//translation initiation factor activity//glutamate:sodium symporter activity//transcription cofactor activity//RNA polymerase II transcription cofactor activity	GO:0005672//GO:0005667//GO:0005737//GO:0005840//GO:0000124//GO:0005634//GO:0016020//GO:0016592//GO:0016021//GO:0005852	transcription factor TFIIA complex//transcription factor complex//cytoplasm//ribosome//SAGA complex//nucleus//membrane//mediator complex//integral component of membrane//eukaryotic translation initiation factor 3 complex	--	--
Cluster-342212.221143	2091	514746119	XP_004961045.1	141	1.8e-06	PREDICTED: putative cytochrome c oxidase subunit 5b-like [Setaria italica]	--	--	--	--	--	--	--	--	--	P79010	283	8.6e-24	Cytochrome c oxidase subunit 4, mitochondrial OS=Schizosaccharomyces pombe (strain 972 / ATCC 24843) GN=cox4 PE=2 SV=1	PF01215	Cytochrome c oxidase subunit Vb	GO:0015992//GO:0006123	proton transport//mitochondrial electron transport, cytochrome c to oxygen	GO:0004129	cytochrome-c oxidase activity	GO:0005740//GO:0045277	mitochondrial envelope//respiratory chain complex IV	--	--
Cluster-342212.195944	1098	--	--	--	--	--	--	--	--	--	--	--	--	--	--	--	--	--	--	PF05818//PF10152//PF00076	Enterobacterial TraT complement resistance protein//Predicted coiled-coil domain-containing protein (DUF2360)//RNA recognition motif. (a.k.a. RRM, RBD, or RNP domain)	GO:0046999	regulation of conjugation	GO:0003676	nucleic acid binding	GO:0071203//GO:0019867	WASH complex//outer membrane	--	--
Cluster-342711.1	2042	195657921	ACG48428.1	738	1e-75	proteasome subunit alpha type 1 [Zea mays]	--	--	--	--	--	K02725	PSMA1	20S proteasome subunit alpha 6	http://www.genome.jp/dbget-bin/www_bget?ko:K02725	P40086	796	2.8e-83	Cytochrome c oxidase assembly protein COX15 OS=Saccharomyces cerevisiae (strain ATCC 204508 / S288c) GN=COX15 PE=3 SV=1	PF10584//PF00227//PF02628	Proteasome subunit A N-terminal signature//Proteasome subunit//Cytochrome oxidase assembly protein	GO:0051603//GO:0006511//GO:0006784//GO:0055114	proteolysis involved in cellular protein catabolic process//ubiquitin-dependent protein catabolic process//heme a biosynthetic process//oxidation-reduction process	GO:0004175//GO:0016627//GO:0004298	endopeptidase activity//oxidoreductase activity, acting on the CH-CH group of donors//threonine-type endopeptidase activity	GO:0016021//GO:0005839//GO:0019773	integral component of membrane//proteasome core complex//proteasome core complex, alpha-subunit complex	KOG2725	Cytochrome oxidase assembly factor COX15
Cluster-342212.153744	1878	551564508	XP_005768828.1	877	7.2e-92	hypothetical protein EMIHUDRAFT_41308, partial [Emiliania huxleyi CCMP1516]>gi|485619595|gb|EOD16399.1| hypothetical protein EMIHUDRAFT_41308, partial [Emiliania huxleyi CCMP1516]	--	--	--	--	--	--	--	--	--	Q58A42	518	4.4e-51	Protein DD3-3 OS=Dictyostelium discoideum GN=DD3-3 PE=2 SV=1	--	--	--	--	--	--	--	--	--	--
Cluster-342212.164044	891	--	--	--	--	--	--	--	--	--	--	--	--	--	--	Q01456	127	4.5e-06	Ovarian abundant message protein OS=Ascaris suum GN=OAM PE=2 SV=1	PF06268	Fascin domain	--	--	GO:0030674//GO:0051015	protein binding, bridging//actin filament binding	--	--	--	--
Cluster-342212.115202	732	--	--	--	--	--	--	--	--	--	--	--	--	--	--	P24211	138	2e-07	Putative protein RhsE OS=Escherichia coli (strain K12) GN=rhsE PE=5 SV=3	--	--	--	--	--	--	--	--	--	--
Cluster-342212.223234	2079	--	--	--	--	--	--	--	--	--	--	--	--	--	--	B0D4E7	534	6.8e-53	Probable velvet family sexual development regulator LACBIDRAFT_317102 OS=Laccaria bicolor (strain S238N-H82 / ATCC MYA-4686) GN=LACBIDRAFT_317102 PE=2 SV=1	--	--	--	--	--	--	--	--	--	--
Cluster-211883.1	801	--	--	--	--	--	--	--	--	--	--	--	--	--	--	--	--	--	--	PF13673//PF13508//PF00583//PF00647//PF08445	Acetyltransferase (GNAT) domain//Acetyltransferase (GNAT) domain//Acetyltransferase (GNAT) family//Elongation factor 1 gamma, conserved domain//FR47-like protein	GO:0042967//GO:0006448//GO:0006414	acyl-carrier-protein biosynthetic process//regulation of translational elongation//translational elongation	GO:0003746//GO:0016747//GO:0008080	translation elongation factor activity//transferase activity, transferring acyl groups other than amino-acyl groups//N-acetyltransferase activity	GO:0005840	ribosome	--	--
Cluster-342212.195352	4191	685258152	XP_009129363.1	148	5.5e-07	PREDICTED: ketohexokinase isoform X1 [Brassica rapa]	299749847	XM_001836327.2	37	5.94327e-07	Coprinopsis cinerea okayama7#130 ### hypothetical protein, mRNA	--	--	--	--	--	--	--	--	--	--	--	--	--	--	--	--	--	--
Cluster-342212.84576	454	698466005	XP_009782811.1	263	2.8e-21	PREDICTED: profilin-2-like [Nicotiana sylvestris]	--	--	--	--	--	K05759	PFN	profilin	http://www.genome.jp/dbget-bin/www_bget?ko:K05759	P22271	248	2.1e-20	Profilin-A OS=Physarum polycephalum GN=PROA PE=3 SV=2	--	--	--	--	--	--	--	--	KOG1755	Profilin
Cluster-170283.0	2725	551655905	XP_005830726.1	137	6.8e-06	hypothetical protein GUITHDRAFT_72776, partial [Guillardia theta CCMP2712]>gi|428174853|gb|EKX43746.1| hypothetical protein GUITHDRAFT_72776, partial [Guillardia theta CCMP2712]	--	--	--	--	--	--	--	--	--	Q27874	1561	7.2e-172	Integrin beta pat-3 OS=Caenorhabditis elegans GN=pat-3 PE=1 SV=1	PF01192	RNA polymerase Rpb6	GO:0006144//GO:0006206//GO:0006351	purine nucleobase metabolic process//pyrimidine nucleobase metabolic process//transcription, DNA-templated	GO:0003899//GO:0003677	DNA-directed RNA polymerase activity//DNA binding	GO:0005730	nucleolus	KOG1226	Integrin beta subunit (N-terminal portion of extracellular region)
Cluster-342212.80523	464	545361295	XP_005645950.1	478	3.3e-46	ribosomal protein L24 [Coccomyxa subellipsoidea C-169]>gi|384247921|gb|EIE21406.1| ribosomal protein L24 [Coccomyxa subellipsoidea C-169]	--	--	--	--	--	K02898	RP-L26e, RPL26	large subunit ribosomal protein L26e	http://www.genome.jp/dbget-bin/www_bget?ko:K02898	P61257	411	2.8e-39	60S ribosomal protein L26 OS=Bos taurus GN=RPL26 PE=2 SV=1	PF06257//PF16906	Biofilm formation stimulator VEG//Ribosomal proteins L26 eukaryotic, L24P archaeal	GO:0042254//GO:0042710//GO:0006412	ribosome biogenesis//biofilm formation//translation	GO:0003735	structural constituent of ribosome	GO:0005840//GO:0015934	ribosome//large ribosomal subunit	KOG3401	60S ribosomal protein L26
Cluster-342212.120409	762	224098962	XP_002311335.1	592	3.3e-59	14-3-3-like protein GF14 iota [Populus trichocarpa]>gi|743782974|ref|XP_011018458.1| PREDICTED: 14-3-3-like protein GF14 iota isoform X1 [Populus euphratica]>gi|118484342|gb|ABK94048.1| unknown [Populus trichocarpa]>gi|222851155|gb|EEE88702.1| 14-3-3-like protein GF14 iota [Populus trichocarpa]	336274645	XM_003352029.1	62	1.31957e-21	Sordaria macrospora k-hell hypothetical protein (SMAC_00625), mRNA	K06630	YWHAE	14-3-3 protein epsilon	http://www.genome.jp/dbget-bin/www_bget?ko:K06630	P54632	574	5.7e-58	14-3-3-like protein OS=Dictyostelium discoideum GN=fttB PE=1 SV=2	PF05823	Nematode fatty acid retinoid binding protein (Gp-FAR-1)	--	--	GO:0008289	lipid binding	--	--	KOG0841	Multifunctional chaperone (14-3-3 family)
Cluster-342212.53133	875	566029716	ETI52627.1	748	3.1e-77	hypothetical protein F443_04343 [Phytophthora parasitica P1569]>gi|566029717|gb|ETI52628.1| hypothetical protein, variant [Phytophthora parasitica P1569]>gi|567967327|gb|ETK92507.1| hypothetical protein L915_04197 [Phytophthora parasitica]>gi|567967328|gb|ETK92508.1| hypothetical protein, variant [Phytophthora parasitica]>gi|567995786|gb|ETL45916.1| hypothetical protein L916_04151 [Phytophthora p…	--	--	--	--	--	K02991	RP-S6e, RPS6	small subunit ribosomal protein S6e	http://www.genome.jp/dbget-bin/www_bget?ko:K02991	Q90YR8	804	1.4e-84	40S ribosomal protein S6 OS=Ictalurus punctatus GN=rps6 PE=2 SV=1	PF01092//PF06459	Ribosomal protein S6e//Ryanodine Receptor TM 4-6	GO:0006816//GO:0042254//GO:0006874//GO:0006412	calcium ion transport//ribosome biogenesis//cellular calcium ion homeostasis//translation	GO:0003735//GO:0005219	structural constituent of ribosome//ryanodine-sensitive calcium-release channel activity	GO:0005622//GO:0016021//GO:0005840	intracellular//integral component of membrane//ribosome	KOG1646	40S ribosomal protein S6
Cluster-342212.223142	2445	--	--	--	--	--	--	--	--	--	--	--	--	--	--	Q9WU82	734	5.1e-76	Catenin beta-1 OS=Rattus norvegicus GN=Ctnnb1 PE=1 SV=1	PF00514	Armadillo/beta-catenin-like repeat	--	--	GO:0005515	protein binding	--	--	KOG4203	Armadillo/beta-Catenin/plakoglobin
Cluster-342212.91282	546	676393549	XP_009040052.1	316	2.4e-27	hypothetical protein AURANDRAFT_66559 [Aureococcus anophagefferens]>gi|323449261|gb|EGB05150.1| hypothetical protein AURANDRAFT_66559 [Aureococcus anophagefferens]	--	--	--	--	--	K02889	RP-L21e, RPL21	large subunit ribosomal protein L21e	http://www.genome.jp/dbget-bin/www_bget?ko:K02889	O42706	308	2.8e-27	60S ribosomal protein L21-B OS=Schizosaccharomyces pombe (strain 972 / ATCC 24843) GN=rpl2102 PE=2 SV=2	PF00165//PF07818//PF01157	Bacterial regulatory helix-turn-helix proteins, AraC family//HCNGP-like protein//Ribosomal protein L21e	GO:0042254//GO:0006355//GO:0006412	ribosome biogenesis//regulation of transcription, DNA-templated//translation	GO:0043565//GO:0003735//GO:0003700	sequence-specific DNA binding//structural constituent of ribosome//transcription factor activity, sequence-specific DNA binding	GO:0005622//GO:0005667//GO:0005840	intracellular//transcription factor complex//ribosome	KOG1732	60S ribosomal protein L21
Cluster-342212.48428	752	--	--	--	--	--	--	--	--	--	--	--	--	--	--	--	--	--	--	--	--	--	--	--	--	--	--	--	--
Cluster-342212.110892	1785	145340597	XP_001415408.1	1344	4.9e-146	P-ATPase family transporter: sodium/potassium ion [Ostreococcus lucimarinus CCE9901]>gi|144575631|gb|ABO93700.1| P-ATPase family transporter: sodium/potassium ion [Ostreococcus lucimarinus CCE9901]	116641023	CT836766.1	456	0	Oryza sativa (indica cultivar-group) cDNA clone:OSIGCRA122K13, full insert sequence	K01539	ATP1A	sodium/potassium-transporting ATPase subunit alpha	http://www.genome.jp/dbget-bin/www_bget?ko:K01539	P13607	2360	1.1e-264	Sodium/potassium-transporting ATPase subunit alpha OS=Drosophila melanogaster GN=Atpalpha PE=1 SV=3	--	--	GO:0006810	transport	GO:0003824	catalytic activity	--	--	KOG0203	Na+/K+ ATPase, alpha subunit
Cluster-342212.224383	1059	612395384	XP_007513212.1	651	6.6e-66	predicted protein [Bathycoccus prasinos]>gi|412993237|emb|CCO16770.1| predicted protein [Bathycoccus prasinos]	694525190	XM_009494092.1	90	5.05071e-37	Fonticula alba 50S ribosomal protein L7Ae mRNA	K02936	RP-L7Ae, RPL7A	large subunit ribosomal protein L7Ae	http://www.genome.jp/dbget-bin/www_bget?ko:K02936	P35685	638	3e-65	60S ribosomal protein L7a-1 OS=Oryza sativa subsp. japonica GN=RPL7A-1 PE=2 SV=1	--	--	--	--	--	--	--	--	KOG3166	60S ribosomal protein L7A
Cluster-342212.221777	3451	695395029	XP_009521060.1	1665	5.6e-183	hypothetical protein PHYSODRAFT_555469 [Phytophthora sojae]>gi|348685957|gb|EGZ25772.1| hypothetical protein PHYSODRAFT_555469 [Phytophthora sojae]	--	--	--	--	--	K03178	UBE1, UBA1	ubiquitin-activating enzyme E1	http://www.genome.jp/dbget-bin/www_bget?ko:K03178	Q55C16	1262	4.3e-137	Ubiquitin-like modifier-activating enzyme 1 OS=Dictyostelium discoideum GN=uba1 PE=3 SV=1	PF00899	ThiF family	--	--	GO:0008641	small protein activating enzyme activity	--	--	KOG2012	Ubiquitin activating enzyme UBA1
Cluster-342212.185306	317	--	--	--	--	--	--	--	--	--	--	--	--	--	--	--	--	--	--	--	--	--	--	--	--	--	--	--	--
Cluster-342212.230136	431	--	--	--	--	--	--	--	--	--	--	--	--	--	--	--	--	--	--	--	--	--	--	--	--	--	--	--	--
Cluster-342212.78996	2925	673052393	XP_008880157.1	351	1.1e-30	hypothetical protein H310_14140 [Aphanomyces invadans]>gi|574464270|gb|ETV91320.1| hypothetical protein H310_14140 [Aphanomyces invadans]	299748524	XM_001839151.2	100	3.93274e-42	Coprinopsis cinerea okayama7#130 t## hypothetical protein, mRNA	--	--	--	--	Q9ULJ7	249	1.1e-19	Ankyrin repeat domain-containing protein 50 OS=Homo sapiens GN=ANKRD50 PE=1 SV=4	PF13606//PF00023	Ankyrin repeat//Ankyrin repeat	--	--	GO:0005515	protein binding	--	--	KOG0504	FOG: Ankyrin repeat
Cluster-354923.0	778	168065852	XP_001784860.1	401	4.7e-37	predicted protein [Physcomitrella patens]>gi|162663566|gb|EDQ50323.1| predicted protein [Physcomitrella patens]	299749075	XM_001838436.2	226	9.17861e-113	Coprinopsis cinerea okayama7#130 ### 40s ribosomal protein s10, mRNA	K02947	RP-S10e, RPS10	small subunit ribosomal protein S10e	http://www.genome.jp/dbget-bin/www_bget?ko:K02947	O13614	404	3e-38	40S ribosomal protein S10-B OS=Schizosaccharomyces pombe (strain 972 / ATCC 24843) GN=rps1002 PE=3 SV=1	--	--	--	--	--	--	--	--	KOG3344	40s ribosomal protein s10
Cluster-247489.0	351	460391403	XP_004241310.1	211	2.3e-15	PREDICTED: 60S acidic ribosomal protein P2 [Solanum lycopersicum]	--	--	--	--	--	K02943	RP-LP2, RPLP2	large subunit ribosomal protein LP2	http://www.genome.jp/dbget-bin/www_bget?ko:K02943	Q96UQ7	195	2.3e-14	60S acidic ribosomal protein P2 OS=Rhodotorula glutinis PE=1 SV=1	--	--	--	--	--	--	--	--	KOG3449	60S acidic ribosomal protein P2
Cluster-342212.108831	1058	545706852	XP_005705742.1	509	1.9e-49	40S ribosomal protein S6e [Galdieria sulphuraria]>gi|452822200|gb|EME29222.1| 40S ribosomal protein S6e [Galdieria sulphuraria]	--	--	--	--	--	K02991	RP-S6e, RPS6	small subunit ribosomal protein S6e	http://www.genome.jp/dbget-bin/www_bget?ko:K02991	Q9M3V8	483	2.8e-47	40S ribosomal protein S6 OS=Asparagus officinalis GN=rps6 PE=2 SV=1	PF01092//PF10459	Ribosomal protein S6e//Peptidase S46	GO:0042254//GO:0006412	ribosome biogenesis//translation	GO:0003735//GO:0008239//GO:0070009	structural constituent of ribosome//dipeptidyl-peptidase activity//serine-type aminopeptidase activity	GO:0005622//GO:0005840	intracellular//ribosome	KOG1646	40S ribosomal protein S6
Cluster-342212.48793	2289	326522340	BAK07632.1	1190	4.5e-128	predicted protein [Hordeum vulgare subsp. vulgare]	--	--	--	--	--	--	--	--	--	P32486	1035	6e-111	Beta-glucan synthesis-associated protein KRE6 OS=Saccharomyces cerevisiae (strain ATCC 204508 / S288c) GN=KRE6 PE=1 SV=2	--	--	--	--	--	--	--	--	--	--
Cluster-189489.0	394	761977217	KIZ06973.1	425	3.9e-40	40S ribosomal protein S20-1 [Monoraphidium neglectum]	299743680	XM_001835865.2	262	4.33068e-133	Coprinopsis cinerea okayama7#130 40S ribosomal protein S20, partial mRNA	K02969	RP-S20e, RPS20	small subunit ribosomal protein S20e	http://www.genome.jp/dbget-bin/www_bget?ko:K02969	O74893	440	1e-42	40S ribosomal protein S20 OS=Schizosaccharomyces pombe (strain 972 / ATCC 24843) GN=rps20 PE=1 SV=1	--	--	--	--	--	--	--	--	KOG0900	40S ribosomal protein S20
Cluster-190582.3	439	--	--	--	--	--	--	--	--	--	--	--	--	--	--	--	--	--	--	--	--	--	--	--	--	--	--	--	--
Cluster-342212.117801	1569	545362420	XP_005646442.1	259	2.8e-20	MFS general substrate transporter [Coccomyxa subellipsoidea C-169]>gi|384248414|gb|EIE21898.1| MFS general substrate transporter [Coccomyxa subellipsoidea C-169]	--	--	--	--	--	--	--	--	--	Q9US44	404	6.1e-38	Uncharacterized transporter C1002.16c OS=Schizosaccharomyces pombe (strain 972 / ATCC 24843) GN=SPAC1002.16c PE=3 SV=1	PF07690	Major Facilitator Superfamily	GO:0055085	transmembrane transport	--	--	GO:0016021	integral component of membrane	--	--
Cluster-342212.226075	1087	--	--	--	--	--	--	--	--	--	--	--	--	--	--	--	--	--	--	--	--	--	--	--	--	--	--	--	--
Cluster-342212.226077	1126	--	--	--	--	--	--	--	--	--	--	--	--	--	--	--	--	--	--	--	--	--	--	--	--	--	--	--	--
Cluster-342212.29655	2047	676384059	XP_009035308.1	138	3.9e-06	hypothetical protein AURANDRAFT_23373 [Aureococcus anophagefferens]>gi|323454650|gb|EGB10520.1| hypothetical protein AURANDRAFT_23373 [Aureococcus anophagefferens]	630200934	XM_007853558.1	77	1.6724e-29	Moniliophthora roreri MCA 2997 wos2 protein partial mRNA	--	--	--	--	Q11118	233	5.3e-18	Protein wos2 OS=Schizosaccharomyces pombe (strain 972 / ATCC 24843) GN=wos2 PE=2 SV=1	PF03427	Carbohydrate binding domain (family 19)	GO:0006032	chitin catabolic process	GO:0008061	chitin binding	--	--	KOG3158	HSP90 co-chaperone p23
Cluster-348731.0	1378	--	--	--	--	--	--	--	--	--	--	--	--	--	--	--	--	--	--	--	--	--	--	--	--	--	--	--	--
Cluster-342212.124661	1049	731348632	XP_010685586.1	720	6.5e-74	PREDICTED: 60S acidic ribosomal protein P0 [Beta vulgaris subsp. vulgaris]>gi|870853209|gb|KMT05090.1| hypothetical protein BVRB_7g172440 [Beta vulgaris subsp. vulgaris]	552848974	XM_005852172.1	48	1.11368e-13	Chlorella variabilis hypothetical protein (CHLNCDRAFT_133519) mRNA, complete cds	K02941	RP-LP0, RPLP0	large subunit ribosomal protein LP0	http://www.genome.jp/dbget-bin/www_bget?ko:K02941	Q9DG68	688	4.7e-71	60S acidic ribosomal protein P0 OS=Rana sylvatica GN=RPLP0 PE=2 SV=1	PF00466	Ribosomal protein L10	GO:0042254	ribosome biogenesis	--	--	GO:0005622	intracellular	KOG0815	60S acidic ribosomal protein P0
Cluster-266457.0	1794	685334839	XP_009104889.1	300	5.6e-25	PREDICTED: LOW QUALITY PROTEIN: cytochrome P450 734A1 [Brassica rapa]	--	--	--	--	--	--	--	--	--	Q9ASR3	261	2.6e-21	Cytochrome P450 709B1 OS=Arabidopsis thaliana GN=CYP709B1 PE=2 SV=1	PF00067	Cytochrome P450	GO:0055114	oxidation-reduction process	GO:0016705//GO:0005506//GO:0020037	oxidoreductase activity, acting on paired donors, with incorporation or reduction of molecular oxygen//iron ion binding//heme binding	--	--	KOG0157	Cytochrome P450 CYP4/CYP19/CYP26 subfamilies
Cluster-342212.101161	695	--	--	--	--	--	--	--	--	--	--	--	--	--	--	--	--	--	--	--	--	--	--	--	--	--	--	--	--
Cluster-342212.236103	853	--	--	--	--	--	--	--	--	--	--	--	--	--	--	--	--	--	--	--	--	--	--	--	--	--	--	--	--
Cluster-342212.135312	662	729302603	XP_010525185.1	671	2e-68	PREDICTED: 60S ribosomal protein L11-1 [Tarenaya hassleriana]	813149488	XM_012345001.1	115	3.92395e-51	Saprolegnia parasitica CBS 223.65 60S ribosomal protein L11 mRNA	K02868	RP-L11e, RPL11	large subunit ribosomal protein L11e	http://www.genome.jp/dbget-bin/www_bget?ko:K02868	P42795	665	1.4e-68	60S ribosomal protein L11-1 OS=Arabidopsis thaliana GN=RPL11A PE=2 SV=2	--	--	--	--	--	--	--	--	KOG0397	60S ribosomal protein L11
Cluster-349786.1	2526	308805542	XP_003080083.1	392	1.7e-35	NUD24_ARATH Nudix hydrolase 24, chloroplast precursor (ISS) [Ostreococcus tauri]	--	--	--	--	--	--	--	--	--	P41888	431	7.2e-41	Thiamine pyrophosphokinase OS=Schizosaccharomyces pombe (strain 972 / ATCC 24843) GN=tnr3 PE=4 SV=1	PF00293//PF01328	NUDIX domain//Peroxidase, family 2	GO:0006979//GO:0006804	response to oxidative stress//obsolete peroxidase reaction	GO:0016787//GO:0004601	hydrolase activity//peroxidase activity	--	--	KOG4313	Thiamine pyrophosphokinase
Cluster-342212.40501	1265	--	--	--	--	--	--	--	--	--	--	--	--	--	--	--	--	--	--	PF00335	Tetraspanin family	--	--	--	--	GO:0016021	integral component of membrane	--	--
Cluster-176685.2	1900	695455792	XP_009536799.1	139	2.8e-06	hypothetical protein PHYSODRAFT_529493 [Phytophthora sojae]>gi|348667408|gb|EGZ07233.1| hypothetical protein PHYSODRAFT_529493 [Phytophthora sojae]	928523167	XM_014224906.1	118	2.5039e-52	Bipolaris maydis ATCC 48331 hypothetical protein partial mRNA	--	--	--	--	Q5AUW8	538	2.1e-53	Tyrosinase-like protein orsC OS=Emericella nidulans (strain FGSC A4 / ATCC 38163 / CBS 112.46 / NRRL 194 / M139) GN=orsC PE=2 SV=1	PF00264	Common central domain of tyrosinase	GO:0008152	metabolic process	GO:0016491	oxidoreductase activity	--	--	--	--
Cluster-342212.246651	1934	302800531	XP_002982023.1	719	1.6e-73	hypothetical protein SELMODRAFT_115290 [Selaginella moellendorffii]>gi|300150465|gb|EFJ17116.1| hypothetical protein SELMODRAFT_115290 [Selaginella moellendorffii]	--	--	--	--	--	--	--	--	--	A0A0E0RTV6	862	5.8e-91	FAD-linked oxidoreductase ZEB1 OS=Gibberella zeae (strain PH-1 / ATCC MYA-4620 / FGSC 9075 / NRRL 31084) GN=ZEB1 PE=2 SV=2	PF08031//PF01565	Berberine and berberine like//FAD binding domain	GO:0055114	oxidation-reduction process	GO:0050660//GO:0016491	flavin adenine dinucleotide binding//oxidoreductase activity	--	--	--	--
Cluster-342212.89182	759	226501140	NP_001152197.1	135	3.2e-06	LOC100285835 [Zea mays]>gi|195653721|gb|ACG46328.1| keratin-associated protein 5-4 [Zea mays]	--	--	--	--	--	--	--	--	--	Q9BYQ9	145	3.1e-08	Keratin-associated protein 4-8 OS=Homo sapiens GN=KRTAP4-8 PE=2 SV=4	--	--	--	--	--	--	--	--	--	--
Cluster-342212.156970	1382	--	--	--	--	--	--	--	--	--	--	--	--	--	--	D4B3I5	142	1.3e-07	Extracellular serine-rich protein ARB_03024 OS=Arthroderma benhamiae (strain ATCC MYA-4681 / CBS 112371) GN=ARB_03024 PE=1 SV=1	PF02298	Plastocyanin-like domain	GO:0006118	obsolete electron transport	GO:0009055	electron carrier activity	--	--	--	--
Cluster-274429.0	2433	657367809	KEH15288.1	166	2.6e-09	hopanoid biosynthesis associated glycosyl transferase HpnI, partial [Medicago truncatula]	299756067	XM_001829020.2	184	6.58071e-89	Coprinopsis cinerea okayama7#130 ### hypothetical protein, mRNA	--	--	--	--	J9W453	805	3e-84	Ceramide glucosyltransferase OS=Cryptococcus neoformans var. grubii serotype A (strain H99 / ATCC 208821 / CBS 10515 / FGSC 9487) GN=GCS1 PE=1 SV=1	PF13506//PF00046	Glycosyl transferase family 21//Homeobox domain	--	--	GO:0016757//GO:0003677	transferase activity, transferring glycosyl groups//DNA binding	--	--	KOG2547	Ceramide glucosyltransferase
Cluster-151072.0	1571	567974996	ETL25570.1	192	1.6e-12	hypothetical protein L916_20595 [Phytophthora parasitica]	--	--	--	--	--	--	--	--	--	D4ATM6	369	6.9e-34	Uncharacterized secreted protein ARB_07590 OS=Arthroderma benhamiae (strain ATCC MYA-4681 / CBS 112371) GN=ARB_07590 PE=1 SV=1	--	--	--	--	--	--	--	--	--	--
Cluster-356471.0	2603	545705668	XP_005705153.1	913	6.7e-96	hypothetical protein Gasu_38420 [Galdieria sulphuraria]>gi|452821605|gb|EME28633.1| hypothetical protein Gasu_38420 [Galdieria sulphuraria]	--	--	--	--	--	--	--	--	--	--	--	--	--	--	--	--	--	--	--	--	--	--	--
Cluster-342212.187838	2403	813135611	XP_012198548.1	173	4e-10	hypothetical protein SPRG_04752 [Saprolegnia parasitica CBS 223.65]>gi|641536980|gb|KDO30851.1| hypothetical protein SPRG_04752 [Saprolegnia parasitica CBS 223.65]	--	--	--	--	--	--	--	--	--	Q61382	199	5.5e-14	TNF receptor-associated factor 4 OS=Mus musculus GN=Traf4 PE=1 SV=2	PF02176	TRAF-type zinc finger	--	--	GO:0008270	zinc ion binding	--	--	--	--
Cluster-342212.158320	1352	--	--	--	--	--	--	--	--	--	--	--	--	--	--	--	--	--	--	PF00642//PF01733//PF02285	Zinc finger C-x8-C-x5-C-x3-H type (and similar)//Nucleoside transporter//Cytochrome oxidase c subunit VIII	GO:0006810//GO:0006123//GO:0015992//GO:0015858	transport//mitochondrial electron transport, cytochrome c to oxygen//proton transport//nucleoside transport	GO:0004129//GO:0046872//GO:0005337	cytochrome-c oxidase activity//metal ion binding//nucleoside transmembrane transporter activity	GO:0016021//GO:0045277	integral component of membrane//respiratory chain complex IV	--	--
Cluster-342212.155387	1629	--	--	--	--	--	--	--	--	--	--	--	--	--	--	--	--	--	--	--	--	--	--	--	--	--	--	--	--
Cluster-342212.29287	3220	546313138	XP_005715189.1	285	5.5e-23	unnamed protein product [Chondrus crispus]>gi|507111657|emb|CDF35370.1| unnamed protein product [Chondrus crispus]	--	--	--	--	--	--	--	--	--	--	--	--	--	PF01925//PF03606//PF15150//PF12937//PF05430//PF00646	Sulfite exporter TauE/SafE//C4-dicarboxylate anaerobic carrier//Phorbol-12-myristate-13-acetate-induced//F-box-like//S-adenosyl-L-methionine-dependent methyltransferase//F-box domain	GO:0006974//GO:0001836//GO:0006915//GO:0055114//GO:0006919	cellular response to DNA damage stimulus//release of cytochrome c from mitochondria//apoptotic process//oxidation-reduction process//activation of cysteine-type endopeptidase activity involved in apoptotic process	GO:0016645//GO:0005515	oxidoreductase activity, acting on the CH-NH group of donors//protein binding	GO:0016021	integral component of membrane	--	--
Cluster-310118.0	3116	661884296	CDP12213.1	1455	1.1e-158	unnamed protein product [Coffea canephora]	--	--	--	--	--	--	--	--	--	O14031	1730	2.1e-191	Glutathione transporter 1 OS=Schizosaccharomyces pombe (strain 972 / ATCC 24843) GN=pgt1 PE=1 SV=1	PF03169	OPT oligopeptide transporter protein	GO:0055085	transmembrane transport	--	--	--	--	KOG2262	Sexual differentiation process protein ISP4
Cluster-342212.150422	655	326499265	BAK06123.1	952	5.1e-101	predicted protein [Hordeum vulgare subsp. vulgare]	299747122	XM_001841211.2	400	0	Coprinopsis cinerea okayama7#130 60S ribosomal protein L2, partial mRNA	K02938	RP-L8e, RPL8	large subunit ribosomal protein L8e	http://www.genome.jp/dbget-bin/www_bget?ko:K02938	Q9V3G1	864	1.2e-91	60S ribosomal protein L8 OS=Drosophila melanogaster GN=RpL8 PE=1 SV=1	PF02022//PF00181//PF03947	Integrase Zinc binding domain//Ribosomal Proteins L2, RNA binding domain//Ribosomal Proteins L2, C-terminal domain	GO:0042254//GO:0006412	ribosome biogenesis//translation	GO:0008270//GO:0003735	zinc ion binding//structural constituent of ribosome	GO:0005622//GO:0005840	intracellular//ribosome	KOG2309	60s ribosomal protein L2/L8
Cluster-342212.27100	485	112253313	ABI14244.1	224	9.8e-17	40S ribosomal protein [Pfiesteria piscicida]	--	--	--	--	--	K02971	RP-S21e, RPS21	small subunit ribosomal protein S21e	http://www.genome.jp/dbget-bin/www_bget?ko:K02971	Q9SMI2	220	4e-17	40S ribosomal protein S21 OS=Cyanophora paradoxa GN=RPS21 PE=3 SV=1	PF01249	Ribosomal protein S21e	GO:0042254//GO:0006412	ribosome biogenesis//translation	GO:0003735	structural constituent of ribosome	GO:0005840//GO:0005622	ribosome//intracellular	KOG3486	40S ribosomal protein S21
Cluster-342212.234095	2891	--	--	--	--	--	169862912	XM_001838028.1	42	6.78541e-10	Coprinopsis cinerea okayama7#130 ]# hypothetical protein, mRNA	--	--	--	--	--	--	--	--	PF00732//PF03884	GMC oxidoreductase//Domain of unknown function (DUF329)	GO:0055114	oxidation-reduction process	GO:0008270//GO:0050660//GO:0016614	zinc ion binding//flavin adenine dinucleotide binding//oxidoreductase activity, acting on CH-OH group of donors	--	--	--	--
Cluster-182916.0	444	545712463	XP_005708536.1	396	1e-36	60S ribosomal protein L35 [Galdieria sulphuraria]>gi|452825017|gb|EME32016.1| 60S ribosomal protein L35 [Galdieria sulphuraria]	505839726	XM_004613331.1	77	3.41841e-30	PREDICTED: Sorex araneus ribosomal protein L35 (RPL35), mRNA	K02918	RP-L35e, RPL35	large subunit ribosomal protein L35e	http://www.genome.jp/dbget-bin/www_bget?ko:K02918	Q6ZWV7	422	1.4e-40	60S ribosomal protein L35 OS=Mus musculus GN=Rpl35 PE=1 SV=1	PF00831//PF00191	Ribosomal L29 protein//Annexin	GO:0006412//GO:0042254	translation//ribosome biogenesis	GO:0005509//GO:0005544//GO:0003735	calcium ion binding//calcium-dependent phospholipid binding//structural constituent of ribosome	GO:0005840//GO:0005622	ribosome//intracellular	KOG3436	60S ribosomal protein L35
Cluster-342212.130380	332	747085950	XP_011090452.1	348	2.8e-31	PREDICTED: 60S ribosomal protein L30 [Sesamum indicum]	195622825	EU961125.1	53	5.45984e-17	Zea mays clone 232808 60S ribosomal protein L30 mRNA, complete cds	K02908	RP-L30e, RPL30	large subunit ribosomal protein L30e	http://www.genome.jp/dbget-bin/www_bget?ko:K02908	O48558	338	5.7e-31	60S ribosomal protein L30 OS=Zea mays GN=RPL30 PE=3 SV=1	--	--	--	--	--	--	--	--	KOG2988	60S ribosomal protein L30
Cluster-342212.125232	490	--	--	--	--	--	--	--	--	--	--	--	--	--	--	--	--	--	--	--	--	--	--	--	--	--	--	--	--
Cluster-342212.154286	580	145351130	XP_001419938.1	482	1.4e-46	Heat Shock Protein 90, cytosolic [Ostreococcus lucimarinus CCE9901]>gi|144580171|gb|ABO98231.1| Heat Shock Protein 90, cytosolic [Ostreococcus lucimarinus CCE9901]	156987065	EU080635.1	100	7.43722e-43	Phytophthora sp. P3007 heat shock protein 90 (HSP90) gene, partial cds	K04079	htpG, HSP90A	molecular chaperone HtpG	http://www.genome.jp/dbget-bin/www_bget?ko:K04079	P36182	470	5e-46	Heat shock protein 82 (Fragment) OS=Nicotiana tabacum GN=HSP82 PE=2 SV=1	PF15168//PF00183//PF00752	Triple QxxK/R motif-containing protein family//Hsp90 protein//XPG N-terminal domain	GO:0006457//GO:0006281//GO:0006950	protein folding//DNA repair//response to stress	GO:0005524//GO:0004518//GO:0051082	ATP binding//nuclease activity//unfolded protein binding	GO:0005789	endoplasmic reticulum membrane	KOG0019	Molecular chaperone (HSP90 family)
Cluster-228943.0	1010	551666460	XP_005835991.1	685	7.1e-70	cathepsin B-like cysteine protease [Guillardia theta CCMP2712]>gi|428180143|gb|EKX49011.1| cathepsin B-like cysteine protease [Guillardia theta CCMP2712]	290992563	XM_002678858.1	470	0	Naegleria gruberi predicted protein, mRNA	K01363	CTSB	cathepsin B	http://www.genome.jp/dbget-bin/www_bget?ko:K01363	P07688	555	1.2e-55	Cathepsin B OS=Bos taurus GN=CTSB PE=1 SV=5	PF08127//PF00112//PF03051	Peptidase family C1 propeptide//Papain family cysteine protease//Peptidase C1-like family	GO:0050790//GO:0006508	regulation of catalytic activity//proteolysis	GO:0008234//GO:0004197	cysteine-type peptidase activity//cysteine-type endopeptidase activity	--	--	KOG1543	Cysteine proteinase Cathepsin L
Cluster-342212.132421	461	552819164	XP_005845356.1	529	4e-52	hypothetical protein CHLNCDRAFT_32281 [Chlorella variabilis]>gi|307105003|gb|EFN53254.1| hypothetical protein CHLNCDRAFT_32281 [Chlorella variabilis]	765134929	XM_004074096.2	68	3.57559e-25	PREDICTED: Oryzias latipes ribosomal protein L15 (rpl15), mRNA	K02877	RP-L15e, RPL15	large subunit ribosomal protein L15e	http://www.genome.jp/dbget-bin/www_bget?ko:K02877	P61313	559	1.9e-56	60S ribosomal protein L15 OS=Homo sapiens GN=RPL15 PE=1 SV=2	PF00827	Ribosomal L15	GO:0042254//GO:0006412	ribosome biogenesis//translation	GO:0003735	structural constituent of ribosome	GO:0005840	ribosome	KOG1678	60s ribosomal protein L15
Cluster-137983.4	2222	27311771	AAO00851.1	266	6.1e-21	Unknown protein [Arabidopsis thaliana]>gi|30725542|gb|AAP37793.1| At5g61270 [Arabidopsis thaliana]	297747482	AC231275.2	194	1.65813e-94	Homo sapiens FOSMID clone ABC12-46987300E12 from chromosome unknown, complete sequence	--	--	--	--	Q32LP2	1387	8.9e-152	Radixin OS=Bos taurus GN=RDX PE=2 SV=1	PF00769	Ezrin/radixin/moesin family	--	--	GO:0008092	cytoskeletal protein binding	GO:0019898//GO:0005737	extrinsic component of membrane//cytoplasm	KOG3529	Radixin, moesin and related proteins of the ERM family
Cluster-342212.87492	723	--	--	--	--	--	--	--	--	--	--	--	--	--	--	--	--	--	--	--	--	--	--	--	--	--	--	--	--
Cluster-342212.150034	1057	514710941	XP_004952156.1	731	3.5e-75	PREDICTED: luminal-binding protein 3 [Setaria italica]	391338260	XM_003743430.1	213	2.12412e-105	PREDICTED: Metaseiulus occidentalis 78 kDa glucose-regulated protein-like, transcript variant 2 (LOC100901400), mRNA	K09490	HSPA5, BIP	heat shock 70kDa protein 5	http://www.genome.jp/dbget-bin/www_bget?ko:K09490	Q16956	885	6.8e-94	78 kDa glucose-regulated protein OS=Aplysia californica PE=1 SV=1	--	--	--	--	--	--	--	--	KOG0100	Molecular chaperones GRP78/BiP/KAR2, HSP70 superfamily
Cluster-342212.153720	846	--	--	--	--	--	--	--	--	--	--	--	--	--	--	--	--	--	--	PF02452	PemK-like, MazF-like toxin of type II toxin-antitoxin system	--	--	GO:0003677	DNA binding	--	--	--	--
Cluster-342212.161257	263	383464652	AFH35046.1	248	8.7e-20	trichocyst-like protein 2 [Pyrenomonas helgolandii]	551645416	XM_005825440.1	56	9.02705e-19	Guillardia theta CCMP2712 hypothetical protein (GUITHDRAFT_154680) mRNA, partial cds	--	--	--	--	--	--	--	--	--	--	--	--	--	--	--	--	--	--
Cluster-342212.48494	3878	--	--	--	--	--	--	--	--	--	--	--	--	--	--	--	--	--	--	PF14554	VEGF heparin-binding domain	--	--	GO:0008201	heparin binding	--	--	--	--
Cluster-342212.31087	2343	--	--	--	--	--	--	--	--	--	--	--	--	--	--	--	--	--	--	--	--	--	--	--	--	--	--	--	--
Cluster-342212.83169	663	302846401	XP_002954737.1	684	6.1e-70	component of cytosolic 80S ribosome and 60S large subunit [Volvox carteri f. nagariensis]>gi|300259920|gb|EFJ44143.1| component of cytosolic 80S ribosome and 60S large subunit [Volvox carteri f. nagariensis]	675118917	KJ877338.1	93	6.67033e-39	Fictor sp. 2 VS-2014 strain RS9002 large subunit ribosomal protein 10 (rpl-10) mRNA, partial cds	K02866	RP-L10e, RPL10	large subunit ribosomal protein L10e	http://www.genome.jp/dbget-bin/www_bget?ko:K02866	A2ZCQ7	682	1.5e-70	60S ribosomal protein L10-1 OS=Oryza sativa subsp. indica GN=SC34 PE=2 SV=2	PF00252//PF03664	Ribosomal protein L16p/L10e//Glycosyl hydrolase family 62	GO:0005975//GO:0006412//GO:0046373//GO:0042254//GO:0009117	carbohydrate metabolic process//translation//L-arabinose metabolic process//ribosome biogenesis//nucleotide metabolic process	GO:0046556//GO:0003735	alpha-L-arabinofuranosidase activity//structural constituent of ribosome	GO:0005840//GO:0005622	ribosome//intracellular	KOG0857	60s ribosomal protein L10
Cluster-342212.185396	565	326524259	BAK00513.1	247	2.5e-19	predicted protein [Hordeum vulgare subsp. vulgare]	685042502	LN591027.1	34	3.53598e-06	Cyprinus carpio genome assembly common carp genome ,scaffold 000001179	K02896	RP-L24e, RPL24	large subunit ribosomal protein L24e	http://www.genome.jp/dbget-bin/www_bget?ko:K02896	Q6Y263	293	1.6e-25	60S ribosomal protein L24 OS=Pagrus major GN=rpl24 PE=2 SV=1	PF07565	Band 3 cytoplasmic domain	GO:0006820	anion transport	GO:0008509	anion transmembrane transporter activity	GO:0016021	integral component of membrane	KOG1722	60s ribosomal protein L24
Cluster-342212.50546	2363	--	--	--	--	--	--	--	--	--	--	--	--	--	--	--	--	--	--	--	--	--	--	--	--	--	--	--	--
Cluster-342212.95715	1604	--	--	--	--	--	--	--	--	--	--	--	--	--	--	--	--	--	--	--	--	--	--	--	--	--	--	--	--
Cluster-342212.119134	1380	657394350	KEH35015.1	148	1.8e-07	31 kDa ribonucleoprotein [Medicago truncatula]	299747923	XM_001837290.2	332	1.97113e-171	Coprinopsis cinerea okayama7#130 t## hypothetical protein, mRNA	--	--	--	--	Q9HEQ9	163	4.7e-10	Single-stranded TG1-3 DNA-binding protein OS=Schizosaccharomyces pombe (strain 972 / ATCC 24843) GN=tcg1 PE=1 SV=3	PF00076//PF06470	RNA recognition motif. (a.k.a. RRM, RBD, or RNP domain)//SMC proteins Flexible Hinge Domain	GO:0051276	chromosome organization	GO:0005524//GO:0003676//GO:0005515	ATP binding//nucleic acid binding//protein binding	GO:0005694	chromosome	KOG0118	FOG: RRM domain
Cluster-342212.126821	1396	514802237	XP_004976015.1	252	1.6e-19	PREDICTED: mitotic spindle checkpoint protein MAD2 [Setaria italica]	302695022	XM_003037144.1	177	2.90989e-85	Schizophyllum commune H4-8 hypothetical protein, mRNA	K02537	MAD2	mitotic spindle assembly checkpoint protein MAD2	http://www.genome.jp/dbget-bin/www_bget?ko:K02537	Q9XFH3	249	5.1e-20	Mitotic spindle checkpoint protein MAD2 OS=Zea mays GN=MAD2 PE=2 SV=1	--	--	--	--	--	--	--	--	KOG3285	Spindle assembly checkpoint protein
Cluster-342212.53595	1757	--	--	--	--	--	299741376	XM_001834363.2	302	1.19932e-154	Coprinopsis cinerea okayama7#130 #~# pheromone B alpha 1 receptor, mRNA	--	--	--	--	P56502	770	2.5e-80	Pheromone B alpha 3 receptor OS=Schizophyllum commune (strain H4-8 / FGSC 9210) GN=BAR3 PE=3 SV=2	PF02076	Pheromone A receptor	GO:0007186//GO:0019236//GO:0007606	G-protein coupled receptor signaling pathway//response to pheromone//sensory perception of chemical stimulus	GO:0004932	mating-type factor pheromone receptor activity	GO:0016021	integral component of membrane	--	--
Cluster-342212.132844	431	224066487	XP_002302108.1	577	1e-57	hypothetical protein POPTR_0002s05220g [Populus trichocarpa]>gi|743840232|ref|XP_011026149.1| PREDICTED: 40S ribosomal protein S18-like [Populus euphratica]>gi|118481417|gb|ABK92651.1| unknown [Populus trichocarpa]>gi|222843834|gb|EEE81381.1| hypothetical protein POPTR_0002s05220g [Populus trichocarpa]	927185400	XM_014072024.1	124	2.47007e-56	PREDICTED: Thamnophis sirtalis ribosomal protein S18 (RPS18), mRNA	K02964	RP-S18e, RPS18	small subunit ribosomal protein S18e	http://www.genome.jp/dbget-bin/www_bget?ko:K02964	Q8JGS9	623	6.7e-64	40S ribosomal protein S18 OS=Danio rerio GN=rps18 PE=2 SV=1	PF00416	Ribosomal protein S13/S18	GO:0006412//GO:0042254	translation//ribosome biogenesis	GO:0003735//GO:0003723	structural constituent of ribosome//RNA binding	GO:0022627//GO:0005618//GO:0005773//GO:0005840//GO:0005886//GO:0005622//GO:0005730	cytosolic small ribosomal subunit//cell wall//vacuole//ribosome//plasma membrane//intracellular//nucleolus	KOG3311	Ribosomal protein S18
Cluster-328476.0	570	551630452	XP_005818160.1	255	2.9e-20	hypothetical protein GUITHDRAFT_156656, partial [Guillardia theta CCMP2712]>gi|428161958|gb|EKX31180.1| hypothetical protein GUITHDRAFT_156656, partial [Guillardia theta CCMP2712]	--	--	--	--	--	--	--	--	--	P34121	314	6e-28	Coactosin OS=Dictyostelium discoideum GN=coaA PE=1 SV=1	PF00241//PF02015	Cofilin/tropomyosin-type actin-binding protein//Glycosyl hydrolase family 45	GO:0005982//GO:0005975//GO:0005985	starch metabolic process//carbohydrate metabolic process//sucrose metabolic process	GO:0008810//GO:0003779	cellulase activity//actin binding	GO:0005622	intracellular	KOG3655	Drebrins and related actin binding proteins
Cluster-226390.0	817	760444101	XP_011399119.1	352	2.4e-31	60S ribosomal protein L35a-4 [Auxenochlorella protothecoides]>gi|675353783|gb|KFM26223.1| 60S ribosomal protein L35a-4 [Auxenochlorella protothecoides]	343425375	FQ311434.1	40	2.40877e-09	Sporisorium reilianum SRZ2 chromosome 13 complete DNA sequence	K02917	RP-L35Ae, RPL35A	large subunit ribosomal protein L35Ae	http://www.genome.jp/dbget-bin/www_bget?ko:K02917	Q90YT3	326	3.5e-29	60S ribosomal protein L35a OS=Ictalurus punctatus GN=rpl35a PE=3 SV=1	PF01782//PF01247	RimM N-terminal domain//Ribosomal protein L35Ae	GO:0006364//GO:0042254//GO:0006412	rRNA processing//ribosome biogenesis//translation	GO:0003735	structural constituent of ribosome	GO:0005840//GO:0005622	ribosome//intracellular	KOG0887	60S ribosomal protein L35A/L37
Cluster-342212.26421	2523	--	--	--	--	--	--	--	--	--	--	--	--	--	--	--	--	--	--	PF11857	Domain of unknown function (DUF3377)	--	--	GO:0004222	metalloendopeptidase activity	--	--	--	--
Cluster-342212.186192	1409	--	--	--	--	--	--	--	--	--	--	--	--	--	--	--	--	--	--	--	--	--	--	--	--	--	--	--	--
Cluster-342212.127391	753	--	--	--	--	--	--	--	--	--	--	--	--	--	--	--	--	--	--	--	--	--	--	--	--	--	--	--	--
Cluster-255763.3	836	168044325	XP_001774632.1	716	1.5e-73	predicted protein [Physcomitrella patens]>gi|162674052|gb|EDQ60566.1| predicted protein [Physcomitrella patens]	389624002	XM_003709607.1	137	2.95261e-63	Magnaporthe oryzae 70-15 40S ribosomal protein S3aE (MGG_06919) mRNA, complete cds	K02984	RP-S3Ae, RPS3A	small subunit ribosomal protein S3Ae	http://www.genome.jp/dbget-bin/www_bget?ko:K02984	A8NX92	722	4.3e-75	40S ribosomal protein S1 OS=Coprinopsis cinerea (strain Okayama-7 / 130 / ATCC MYA-4618 / FGSC 9003) GN=RPS1 PE=3 SV=1	PF04083//PF01015	Partial alpha/beta-hydrolase lipase region//Ribosomal S3Ae family	GO:0006629//GO:0006412//GO:0042254	lipid metabolic process//translation//ribosome biogenesis	GO:0003735	structural constituent of ribosome	GO:0030529//GO:0005840//GO:0005737//GO:0005622	intracellular ribonucleoprotein complex//ribosome//cytoplasm//intracellular	KOG1628	40S ribosomal protein S3A
Cluster-342212.121973	820	--	--	--	--	--	--	--	--	--	--	--	--	--	--	--	--	--	--	PF00320	GATA zinc finger	GO:0006355	regulation of transcription, DNA-templated	GO:0008270//GO:0043565//GO:0003700	zinc ion binding//sequence-specific DNA binding//transcription factor activity, sequence-specific DNA binding	GO:0005667	transcription factor complex	--	--
Cluster-360339.0	596	743780258	XP_011024999.1	567	2e-56	PREDICTED: 40S ribosomal protein S15a-like isoform X1 [Populus euphratica]	1002441404	XM_015806059.1	138	5.75269e-64	Leptomonas pyrrhocoris putative mitochondrial 40s ribosomal protein S15a mRNA	K02957	RP-S15Ae, RPS15A	small subunit ribosomal protein S15Ae	http://www.genome.jp/dbget-bin/www_bget?ko:K02957	Q9AT34	552	1.6e-55	40S ribosomal protein S15a OS=Daucus carota GN=RPS15A PE=2 SV=3	PF02119//PF00410	Flagellar P-ring protein//Ribosomal protein S8	GO:0042254//GO:0071973//GO:0006412	ribosome biogenesis//bacterial-type flagellum-dependent cell motility//translation	GO:0003735//GO:0005198	structural constituent of ribosome//structural molecule activity	GO:0009428//GO:0030288//GO:0005840	bacterial-type flagellum basal body, distal rod, P ring//outer membrane-bounded periplasmic space//ribosome	KOG1754	40S ribosomal protein S15/S22
Cluster-317615.0	2211	--	--	--	--	--	--	--	--	--	--	--	--	--	--	--	--	--	--	--	--	--	--	--	--	--	--	--	--
Cluster-342212.144979	1290	218191248	EEC73675.1	918	8.8e-97	hypothetical protein OsI_08223 [Oryza sativa Indica Group]	--	--	--	--	--	K04712	DEGS	sphingolipid delta-4 desaturase	http://www.genome.jp/dbget-bin/www_bget?ko:K04712	Q6H5U3	915	2.8e-97	Sphingolipid delta(4)-desaturase DES1-like OS=Oryza sativa subsp. japonica GN=Os02g0639600 PE=2 SV=1	PF00487	Fatty acid desaturase	GO:0006629	lipid metabolic process	--	--	--	--	KOG2987	Fatty acid desaturase
Cluster-342212.98558	1443	673034430	XP_008871176.1	357	1.1e-31	hypothetical protein H310_07557 [Aphanomyces invadans]>gi|574473147|gb|ETW00151.1| hypothetical protein H310_07557 [Aphanomyces invadans]	299755400	XM_001828584.2	223	8.07909e-111	Coprinopsis cinerea okayama7#130 ### small nuclear ribonucleoprotein polypeptide A, mRNA	K11092	SNRPA1	U2 small nuclear ribonucleoprotein A'	http://www.genome.jp/dbget-bin/www_bget?ko:K11092	Q4WV66	413	5e-39	U2 small nuclear ribonucleoprotein A' OS=Neosartorya fumigata (strain ATCC MYA-4609 / Af293 / CBS 101355 / FGSC A1100) GN=lea1 PE=3 SV=1	PF13855	Leucine rich repeat	--	--	GO:0005515	protein binding	--	--	KOG1644	U2-associated snRNP A' protein
Cluster-261303.0	1022	168053264	XP_001779057.1	201	9.6e-14	predicted protein [Physcomitrella patens]>gi|162669509|gb|EDQ56094.1| predicted protein [Physcomitrella patens]	--	--	--	--	--	--	--	--	--	Q9FJX3	159	1e-09	Mitochondrial outer membrane protein porin 2 OS=Arabidopsis thaliana GN=VDAC2 PE=1 SV=1	PF01459	Eukaryotic porin	GO:0055085	transmembrane transport	--	--	GO:0005741	mitochondrial outer membrane	--	--
Cluster-342212.110430	897	62910952	AAY21192.1	514	4.3e-50	Rpl7A [Euglena gracilis]	--	--	--	--	--	K02936	RP-L7Ae, RPL7A	large subunit ribosomal protein L7Ae	http://www.genome.jp/dbget-bin/www_bget?ko:K02936	P32429	458	1.9e-44	60S ribosomal protein L7a OS=Gallus gallus GN=RPL7A PE=2 SV=2	--	--	--	--	--	--	--	--	KOG3166	60S ribosomal protein L7A
Cluster-303984.0	4308	743944356	XP_011016699.1	317	1.4e-26	PREDICTED: uncharacterized protein K02A2.6-like, partial [Populus euphratica]	--	--	--	--	--	--	--	--	--	P0CT35	284	1.4e-23	Transposon Tf2-2 polyprotein OS=Schizosaccharomyces pombe (strain 972 / ATCC 24843) GN=Tf2-2 PE=3 SV=1	PF00665//PF05090	Integrase core domain//Vitamin K-dependent gamma-carboxylase	GO:0015074//GO:0017187	DNA integration//peptidyl-glutamic acid carboxylation	GO:0008488	gamma-glutamyl carboxylase activity	--	--	KOG0017	FOG: Transposon-encoded proteins with TYA, reverse transcriptase, integrase domains in various combinations
Cluster-342212.119669	2152	570320037	ETO67985.1	420	8.2e-39	choline dehydrogenase [Phytophthora parasitica P1976]	299738262	XM_001838171.2	738	0	Coprinopsis cinerea okayama7#130 ]# alcohol oxidase, mRNA	--	--	--	--	P04842	1639	5.2e-181	Alcohol oxidase 1 OS=Komagataella phaffii (strain GS115 / ATCC 20864) GN=AOX1 PE=1 SV=2	PF05834//PF00732//PF07992//PF05199//PF01134	Lycopene cyclase protein//GMC oxidoreductase//Pyridine nucleotide-disulphide oxidoreductase//GMC oxidoreductase//Glucose inhibited division protein A	GO:0016117//GO:0008033//GO:0055114	carotenoid biosynthetic process//tRNA processing//oxidation-reduction process	GO:0016614//GO:0050660//GO:0016705//GO:0016491	oxidoreductase activity, acting on CH-OH group of donors//flavin adenine dinucleotide binding//oxidoreductase activity, acting on paired donors, with incorporation or reduction of molecular oxygen//oxidoreductase activity	--	--	--	--
Cluster-342212.24374	493	--	--	--	--	--	--	--	--	--	--	--	--	--	--	--	--	--	--	PF01080	Presenilin	--	--	GO:0004190	aspartic-type endopeptidase activity	GO:0016021	integral component of membrane	--	--
Cluster-342212.215114	494	326508326	BAJ99430.1	277	7.1e-23	predicted protein [Hordeum vulgare subsp. vulgare]	--	--	--	--	--	K02917	RP-L35Ae, RPL35A	large subunit ribosomal protein L35Ae	http://www.genome.jp/dbget-bin/www_bget?ko:K02917	P41056	264	3.3e-22	60S ribosomal protein L33-B OS=Saccharomyces cerevisiae (strain ATCC 204508 / S288c) GN=RPL33B PE=1 SV=2	PF01247//PF01782	Ribosomal protein L35Ae//RimM N-terminal domain	GO:0006364//GO:0042254//GO:0006412	rRNA processing//ribosome biogenesis//translation	GO:0003735	structural constituent of ribosome	GO:0005840//GO:0005622	ribosome//intracellular	KOG0887	60S ribosomal protein L35A/L37
Cluster-342212.28740	1768	698794706	XP_009830382.1	1251	2.9e-135	hypothetical protein, variant 1 [Aphanomyces astaci]>gi|574114971|gb|ETV80458.1| hypothetical protein, variant 1 [Aphanomyces astaci]	628853093	XM_007775848.1	424	0	Coniophora puteana RWD-64-598 SS2 catalase mRNA	K03781	katE, CAT, catB, srpA	catalase	http://www.genome.jp/dbget-bin/www_bget?ko:K03781	P55306	1390	3.2e-152	Catalase OS=Schizosaccharomyces pombe (strain 972 / ATCC 24843) GN=cta1 PE=1 SV=1	PF00199	Catalase	GO:0006568//GO:0006804//GO:0015947//GO:0006979//GO:0055114	tryptophan metabolic process//obsolete peroxidase reaction//methane metabolic process//response to oxidative stress//oxidation-reduction process	GO:0004096//GO:0020037	catalase activity//heme binding	--	--	KOG0047	Catalase
Cluster-342212.232136	950	--	--	--	--	--	--	--	--	--	--	--	--	--	--	--	--	--	--	PF00642	Zinc finger C-x8-C-x5-C-x3-H type (and similar)	--	--	GO:0046872	metal ion binding	--	--	--	--
Cluster-366102.0	2189	760448317	XP_011401227.1	1608	1.5e-176	putative chromatin-remodeling complex ATPase chain [Auxenochlorella protothecoides]>gi|675355774|gb|KFM28214.1| putative chromatin-remodeling complex ATPase chain [Auxenochlorella protothecoides]	618809332	XM_007307300.1	464	0	Stereum hirsutum FP-91666 SS1 hypothetical protein (STEHIDRAFT_101315), mRNA	K11654	SMARCA5, SNF2H, ISWI	SWI/SNF-related matrix-associated actin-dependent regulator of chromatin subfamily A member 5	http://www.genome.jp/dbget-bin/www_bget?ko:K11654	Q5A310	1879	7.8e-209	ISWI chromatin-remodeling complex ATPase ISW2 OS=Candida albicans (strain SC5314 / ATCC MYA-2876) GN=ISW2 PE=2 SV=1	PF06733//PF00270//PF04851//PF13892//PF00176	DEAD_2//DEAD/DEAH box helicase//Type III restriction enzyme, res subunit//DNA-binding domain//SNF2 family N-terminal domain	--	--	GO:0004003//GO:0003676//GO:0005524//GO:0003677//GO:0016787	ATP-dependent DNA helicase activity//nucleic acid binding//ATP binding//DNA binding//hydrolase activity	GO:0005657	replication fork	KOG0385	Chromatin remodeling complex WSTF-ISWI, small subunit
Cluster-342212.42874	376	326521768	BAK00460.1	285	6.4e-24	predicted protein [Hordeum vulgare subsp. vulgare]	831344329	XM_012886561.1	57	3.74296e-19	Pseudogymnoascus destructans 20631-21 ribosomal protein L37ae mRNA	K02921	RP-L37Ae, RPL37A	large subunit ribosomal protein L37Ae	http://www.genome.jp/dbget-bin/www_bget?ko:K02921	Q54UG4	282	2e-24	60S ribosomal protein L37a OS=Dictyostelium discoideum GN=rpl37A PE=3 SV=1	PF02892//PF13465//PF01780	BED zinc finger//Zinc-finger double domain//Ribosomal L37ae protein family	GO:0042254//GO:0006412	ribosome biogenesis//translation	GO:0003677//GO:0003735//GO:0046872	DNA binding//structural constituent of ribosome//metal ion binding	GO:0005622//GO:0005840	intracellular//ribosome	KOG0402	60S ribosomal protein L37
Cluster-342212.122763	498	546318895	XP_005716876.1	319	9.7e-28	unnamed protein product [Chondrus crispus]>gi|507113427|emb|CDF37057.1| unnamed protein product [Chondrus crispus]	--	--	--	--	--	K02966	RP-S19e, RPS19	small subunit ribosomal protein S19e	http://www.genome.jp/dbget-bin/www_bget?ko:K02966	P40978	306	4.4e-27	40S ribosomal protein S19 OS=Oryza sativa subsp. japonica GN=RPS19A PE=2 SV=1	PF03444//PF01090	Winged helix-turn-helix transcription repressor, HrcA DNA-binding//Ribosomal protein S19e	GO:0042254//GO:0006412//GO:0006355	ribosome biogenesis//translation//regulation of transcription, DNA-templated	GO:0003677//GO:0003735	DNA binding//structural constituent of ribosome	GO:0005840	ribosome	KOG3411	40S ribosomal protein S19
Cluster-342212.22752	1966	--	--	--	--	--	--	--	--	--	--	--	--	--	--	--	--	--	--	PF00097//PF13639//PF14634	Zinc finger, C3HC4 type (RING finger)//Ring finger domain//zinc-RING finger domain	--	--	GO:0008270//GO:0046872//GO:0005515	zinc ion binding//metal ion binding//protein binding	--	--	--	--
Cluster-342212.172201	745	--	--	--	--	--	--	--	--	--	--	--	--	--	--	--	--	--	--	PF00335//PF01699	Tetraspanin family//Sodium/calcium exchanger protein	GO:0055085	transmembrane transport	--	--	GO:0016021	integral component of membrane	--	--
Cluster-342212.46668	590	--	--	--	--	--	--	--	--	--	--	--	--	--	--	--	--	--	--	--	--	--	--	--	--	--	--	--	--
Cluster-342212.161537	302	545370907	XP_005650058.1	137	7.4e-07	hypothetical protein COCSUDRAFT_52899 [Coccomyxa subellipsoidea C-169]>gi|384252037|gb|EIE25514.1| hypothetical protein COCSUDRAFT_52899 [Coccomyxa subellipsoidea C-169]	--	--	--	--	--	--	--	--	--	P47915	157	5.1e-10	60S ribosomal protein L29 OS=Mus musculus GN=Rpl29 PE=2 SV=2	PF03759//PF01779	PRONE (Plant-specific Rop nucleotide exchanger)//Ribosomal L29e protein family	GO:0006412//GO:0042254//GO:0043087	translation//ribosome biogenesis//regulation of GTPase activity	GO:0005089//GO:0003735	Rho guanyl-nucleotide exchange factor activity//structural constituent of ribosome	GO:0005622//GO:0005840	intracellular//ribosome	KOG3504	60S ribosomal protein L29
Cluster-342212.152239	827	695025720	XP_009400123.1	139	1.2e-06	PREDICTED: zinc finger CCCH domain-containing protein 39-like [Musa acuminata subsp. malaccensis]	--	--	--	--	--	--	--	--	--	--	--	--	--	PF00642//PF17096	Zinc finger C-x8-C-x5-C-x3-H type (and similar)//Altered inheritance of mitochondria protein 3	GO:0051016	barbed-end actin filament capping	GO:0046872	metal ion binding	GO:0030479	actin cortical patch	KOG1677	CCCH-type Zn-finger protein
Cluster-342212.134653	294	--	--	--	--	--	--	--	--	--	--	--	--	--	--	--	--	--	--	--	--	--	--	--	--	--	--	--	--
Cluster-342212.19283	543	--	--	--	--	--	--	--	--	--	--	--	--	--	--	--	--	--	--	--	--	--	--	--	--	--	--	--	--
Cluster-342212.126967	1264	--	--	--	--	--	--	--	--	--	--	--	--	--	--	--	--	--	--	--	--	--	--	--	--	--	--	--	--
Cluster-342212.49673	5886	743855330	XP_010941355.1	4207	0	PREDICTED: DNA-directed RNA polymerase II subunit 1-like [Elaeis guineensis]	299755291	XM_001828525.2	1549	0	Coprinopsis cinerea okayama7#130 ### RNA polymerase II large subunit, mRNA	K03006	RPB1, POLR2A	DNA-directed RNA polymerase II subunit RPB1	http://www.genome.jp/dbget-bin/www_bget?ko:K03006	P36594	5035	0	DNA-directed RNA polymerase II subunit rpb1 OS=Schizosaccharomyces pombe (strain 972 / ATCC 24843) GN=rpb1 PE=1 SV=1	PF05000//PF00623//PF04272//PF04992//PF04998//PF04990//PF05001//PF04997//PF04983	RNA polymerase Rpb1, domain 4//RNA polymerase Rpb1, domain 2//Phospholamban//RNA polymerase Rpb1, domain 6//RNA polymerase Rpb1, domain 5//RNA polymerase Rpb1, domain 7//RNA polymerase Rpb1 C-terminal repeat//RNA polymerase Rpb1, domain 1//RNA polymerase Rpb1, domain 3	GO:0006351//GO:0006206//GO:0006816//GO:0006810//GO:0006144//GO:0006366	transcription, DNA-templated//pyrimidine nucleobase metabolic process//calcium ion transport//transport//purine nucleobase metabolic process//transcription from RNA polymerase II promoter	GO:0003677//GO:0005246//GO:0003899//GO:0042030	DNA binding//calcium channel regulator activity//DNA-directed RNA polymerase activity//ATPase inhibitor activity	GO:0016020//GO:0005665//GO:0005730	membrane//DNA-directed RNA polymerase II, core complex//nucleolus	KOG0260	RNA polymerase II, large subunit
Cluster-342212.180501	1949	551644514	XP_005825048.1	188	5.9e-12	hypothetical protein GUITHDRAFT_165316 [Guillardia theta CCMP2712]>gi|428169131|gb|EKX38068.1| hypothetical protein GUITHDRAFT_165316 [Guillardia theta CCMP2712]	--	--	--	--	--	--	--	--	--	O70145	355	3.6e-32	Neutrophil cytosol factor 2 OS=Mus musculus GN=Ncf2 PE=1 SV=1	PF13374//PF13176//PF13414//PF13181//PF00515//PF00564	Tetratricopeptide repeat//Tetratricopeptide repeat//TPR repeat//Tetratricopeptide repeat//Tetratricopeptide repeat//PB1 domain	--	--	GO:0005515	protein binding	--	--	--	--
Cluster-320520.0	1855	326495874	BAJ90559.1	1838	2.6e-203	predicted protein [Hordeum vulgare subsp. vulgare]	754352374	XM_004343136.2	266	1.30396e-134	Capsaspora owczarzaki ATCC 30864 chaperonin subunit 2 mRNA	K09494	CCT2	T-complex protein 1 subunit beta	http://www.genome.jp/dbget-bin/www_bget?ko:K09494	Q3ZBH0	1877	1.1e-208	T-complex protein 1 subunit beta OS=Bos taurus GN=CCT2 PE=1 SV=3	PF07243//PF00118	Phlebovirus glycoprotein G1//TCP-1/cpn60 chaperonin family	--	--	GO:0005524	ATP binding	GO:0016021//GO:0019012	integral component of membrane//virion	KOG0363	Chaperonin complex component, TCP-1 beta subunit (CCT2)
Cluster-342212.134218	1286	--	--	--	--	--	--	--	--	--	--	--	--	--	--	--	--	--	--	PF14999	Shadow of prion protein, neuroprotective	--	--	--	--	GO:0031225	anchored component of membrane	--	--
Cluster-342212.95279	824	567207093	XP_006409207.1	768	1.4e-79	hypothetical protein EUTSA_v10022820mg [Eutrema salsugineum]>gi|557110369|gb|ESQ50660.1| hypothetical protein EUTSA_v10022820mg [Eutrema salsugineum]	665812846	XM_008556733.1	54	4.00963e-17	PREDICTED: Microplitis demolitor 60S ribosomal protein L8 (LOC103576504), transcript variant X2, mRNA	K02938	RP-L8e, RPL8	large subunit ribosomal protein L8e	http://www.genome.jp/dbget-bin/www_bget?ko:K02938	P46286	764	5.7e-80	60S ribosomal protein L8-1 OS=Arabidopsis thaliana GN=RPL8A PE=1 SV=2	PF00181//PF03947	Ribosomal Proteins L2, RNA binding domain//Ribosomal Proteins L2, C-terminal domain	GO:0006412//GO:0042254	translation//ribosome biogenesis	GO:0003735	structural constituent of ribosome	GO:0005840//GO:0005622	ribosome//intracellular	KOG2309	60s ribosomal protein L2/L8
Cluster-342212.107688	371	--	--	--	--	--	--	--	--	--	--	--	--	--	--	--	--	--	--	--	--	--	--	--	--	--	--	--	--
Cluster-342212.50559	561	--	--	--	--	--	--	--	--	--	--	--	--	--	--	--	--	--	--	--	--	--	--	--	--	--	--	--	--
Cluster-241085.1	2316	545703104	XP_005703879.1	1335	7e-145	elongation factor EF-2 [Galdieria sulphuraria]>gi|452820315|gb|EME27359.1| elongation factor EF-2 [Galdieria sulphuraria]	--	--	--	--	--	K03234	EEF2	elongation factor 2	http://www.genome.jp/dbget-bin/www_bget?ko:K03234	P29691	1301	8.7e-142	Elongation factor 2 OS=Caenorhabditis elegans GN=eef-2 PE=2 SV=4	PF03764//PF03144	Elongation factor G, domain IV//Elongation factor Tu domain 2	--	--	GO:0005525	GTP binding	--	--	KOG0469	Elongation factor 2
Cluster-342212.65340	1872	695013363	XP_009393463.1	700	2.4e-71	PREDICTED: protein disulfide-isomerase-like [Musa acuminata subsp. malaccensis]	20068286	AJ440747.1	55	2.59152e-17	Ostertagia ostertagi mRNA for protein disulfide isomerase 1 (PDI1 gene)	K09580	PDIA1, P4HB	protein disulfide-isomerase A1	http://www.genome.jp/dbget-bin/www_bget?ko:K09580	Q8JG64	1078	5.1e-116	Protein disulfide-isomerase A3 OS=Gallus gallus GN=PDIA3 PE=2 SV=1	PF01216//PF04851//PF08534//PF00085//PF00578//PF00270	Calsequestrin//Type III restriction enzyme, res subunit//Redoxin//Thioredoxin//AhpC/TSA family//DEAD/DEAH box helicase	GO:0055114//GO:0045454	oxidation-reduction process//cell redox homeostasis	GO:0016209//GO:0003676//GO:0003677//GO:0005524//GO:0016491//GO:0005509//GO:0016787	antioxidant activity//nucleic acid binding//DNA binding//ATP binding//oxidoreductase activity//calcium ion binding//hydrolase activity	--	--	KOG0190	Protein disulfide isomerase (prolyl 4-hydroxylase beta subunit)
Cluster-342212.134832	986	819933614	AKG55582.1	202	7.1e-14	calmodulin 2 [Gracilariopsis lemaneiformis]	--	--	--	--	--	--	--	--	--	P07291	322	1.2e-28	Myosin essential light chain, striated adductor muscle OS=Argopecten irradians PE=1 SV=2	PF00036//PF13499//PF13833//PF13405	EF hand//EF-hand domain pair//EF-hand domain pair//EF-hand domain	--	--	GO:0005509	calcium ion binding	--	--	KOG0030	Myosin essential light chain, EF-Hand protein superfamily
Cluster-286491.0	2997	728849967	KHG29410.1	989	1.2e-104	Signal recognition particle receptor subunit alpha [Gossypium arboreum]	695535615	XM_009543447.1	236	1.00787e-117	Heterobasidion irregulare TC 32-1 signal recognition particle receptor partial mRNA	K13431	SRPR	signal recognition particle receptor subunit alpha	http://www.genome.jp/dbget-bin/www_bget?ko:K13431	Q9U5L1	1008	1.1e-107	Signal recognition particle receptor subunit alpha homolog OS=Drosophila melanogaster GN=Gtp-bp PE=1 SV=2	PF12300//PF02881//PF04086//PF01926//PF00448//PF03266	Protein of unknown function (DUF3628)//SRP54-type protein, helical bundle domain//Signal recognition particle, alpha subunit, N-terminal//50S ribosome-binding GTPase//SRP54-type protein, GTPase domain//NTPase	GO:0006614//GO:0006886	SRP-dependent cotranslational protein targeting to membrane//intracellular protein transport	GO:0016817//GO:0098519//GO:0003924//GO:0005525//GO:0005047	hydrolase activity, acting on acid anhydrides//nucleotide phosphatase activity, acting on free nucleotides//GTPase activity//GTP binding//signal recognition particle binding	GO:0005786//GO:0005785	signal recognition particle, endoplasmic reticulum targeting//signal recognition particle receptor complex	KOG0781	Signal recognition particle receptor, alpha subunit
Cluster-342212.124993	1194	--	--	--	--	--	--	--	--	--	--	--	--	--	--	--	--	--	--	--	--	--	--	--	--	--	--	--	--
Cluster-342212.160320	1066	8050572	AAF71706.1	1271	8.5e-138	elongation factor 2, partial [Euglena gracilis]	167534990	XM_001749118.1	217	1.28056e-107	Monosiga brevicollis MX1 predicted protein MONBRDRAFT_11373 mRNA, complete cds	K03234	EEF2	elongation factor 2	http://www.genome.jp/dbget-bin/www_bget?ko:K03234	Q90705	1252	1.9e-136	Elongation factor 2 OS=Gallus gallus GN=EEF2 PE=1 SV=3	PF03764//PF00648	Elongation factor G, domain IV//Calpain family cysteine protease	GO:0006508	proteolysis	GO:0005525//GO:0004198	GTP binding//calcium-dependent cysteine-type endopeptidase activity	GO:0005622	intracellular	KOG0469	Elongation factor 2
Cluster-342212.158607	5661	802546807	XP_012087093.1	4623	0	PREDICTED: clathrin heavy chain 1 isoform X1 [Jatropha curcas]>gi|802546809|ref|XP_012087101.1| PREDICTED: clathrin heavy chain 1 isoform X2 [Jatropha curcas]>gi|643738925|gb|KDP44739.1| hypothetical protein JCGZ_01239 [Jatropha curcas]	347969081	XM_003436308.1	1280	0	Anopheles gambiae str. PEST AGAP003021-PB (AgaP_AGAP003021) mRNA, complete cds	K04646	CLTC	clathrin heavy chain	http://www.genome.jp/dbget-bin/www_bget?ko:K04646	Q68FD5	6893	0	Clathrin heavy chain 1 OS=Mus musculus GN=Cltc PE=1 SV=3	PF04053//PF09497//PF13374//PF00637//PF09268//PF00515	Coatomer WD associated region//Transcription mediator complex subunit Med12//Tetratricopeptide repeat//Region in Clathrin and VPS//Clathrin, heavy-chain linker//Tetratricopeptide repeat	GO:0016192//GO:0006357//GO:0006886	vesicle-mediated transport//regulation of transcription from RNA polymerase II promoter//intracellular protein transport	GO:0001104//GO:0005198//GO:0005515	RNA polymerase II transcription cofactor activity//structural molecule activity//protein binding	GO:0016592//GO:0030117//GO:0030130//GO:0030132	mediator complex//membrane coat//clathrin coat of trans-Golgi network vesicle//clathrin coat of coated pit	KOG0985	Vesicle coat protein clathrin, heavy chain
Cluster-342212.198275	1735	--	--	--	--	--	--	--	--	--	--	--	--	--	--	P22222	179	8.2e-12	Glucan endo-1,3-beta-glucosidase OS=Cellulosimicrobium cellulans PE=1 SV=1	PF08142	AARP2CN (NUC121) domain	GO:0042254	ribosome biogenesis	--	--	GO:0005634	nucleus	--	--
Cluster-338389.0	2914	357465783	XP_003603176.1	1734	4.7e-191	Puromycin-sensitive aminopeptidase [Medicago truncatula]>gi|355492224|gb|AES73427.1| puromycin-sensitive aminopeptidase-like protein [Medicago truncatula]	545710590	XM_005707546.1	54	1.45981e-16	Galdieria sulphuraria puromycin-sensitive aminopeptidase (Gasu_15870) mRNA, complete cds	K08776	NPEPPS	puromycin-sensitive aminopeptidase	http://www.genome.jp/dbget-bin/www_bget?ko:K08776	P55786	2207	9.6e-247	Puromycin-sensitive aminopeptidase OS=Homo sapiens GN=NPEPPS PE=1 SV=2	PF01433	Peptidase family M1	--	--	GO:0008270//GO:0008237	zinc ion binding//metallopeptidase activity	--	--	KOG1046	Puromycin-sensitive aminopeptidase and related aminopeptidases
Cluster-342212.99799	2630	568004956	ETL79263.1	248	8.8e-19	hypothetical protein L917_20039 [Phytophthora parasitica]>gi|570313003|gb|ETO60951.1| hypothetical protein F444_20907 [Phytophthora parasitica P1976]	--	--	--	--	--	K13993	HSP20	HSP20 family protein	http://www.genome.jp/dbget-bin/www_bget?ko:K13993	O14368	212	1.9e-15	Heat shock protein 16 OS=Schizosaccharomyces pombe (strain 972 / ATCC 24843) GN=hsp16 PE=1 SV=1	--	--	--	--	--	--	--	--	KOG0710	Molecular chaperone (small heat-shock protein Hsp26/Hsp42)
Cluster-231185.0	2646	326495704	BAJ85948.1	1235	3.1e-133	predicted protein [Hordeum vulgare subsp. vulgare]	--	--	--	--	--	--	--	--	--	O14031	1469	3.3e-161	Glutathione transporter 1 OS=Schizosaccharomyces pombe (strain 972 / ATCC 24843) GN=pgt1 PE=1 SV=1	PF06703//PF03169	Microsomal signal peptidase 25 kDa subunit (SPC25)//OPT oligopeptide transporter protein	GO:0055085//GO:0006465	transmembrane transport//signal peptide processing	GO:0008233	peptidase activity	GO:0016021//GO:0005787	integral component of membrane//signal peptidase complex	KOG2262	Sexual differentiation process protein ISP4
Cluster-353207.0	677	694389866	XP_009370540.1	267	1.4e-21	PREDICTED: microsomal glutathione S-transferase 3-like [Pyrus x bretschneideri]	--	--	--	--	--	K00799	GST, gst	glutathione S-transferase	http://www.genome.jp/dbget-bin/www_bget?ko:K00799	Q9CPU4	168	6e-11	Microsomal glutathione S-transferase 3 OS=Mus musculus GN=Mgst3 PE=1 SV=1	--	--	--	--	--	--	--	--	--	--
Cluster-342212.104108	507	116786779	ABK24233.1	361	1.3e-32	unknown [Picea sitchensis]	--	--	--	--	--	K16292	CEP, CYSEP	KDEL-tailed cysteine endopeptidase	http://www.genome.jp/dbget-bin/www_bget?ko:K16292	P25779	428	3.2e-41	Cruzipain OS=Trypanosoma cruzi PE=1 SV=1	PF03051//PF00112	Peptidase C1-like family//Papain family cysteine protease	GO:0006508	proteolysis	GO:0004197//GO:0008234	cysteine-type endopeptidase activity//cysteine-type peptidase activity	--	--	KOG1543	Cysteine proteinase Cathepsin L
Cluster-342212.45688	509	761976855	KIZ06647.1	366	3.5e-33	40S ribosomal protein S10 [Monoraphidium neglectum]	--	--	--	--	--	K02947	RP-S10e, RPS10	small subunit ribosomal protein S10e	http://www.genome.jp/dbget-bin/www_bget?ko:K02947	Q90YR4	300	2.2e-26	40S ribosomal protein S10 OS=Ictalurus punctatus GN=rps10 PE=2 SV=1	--	--	--	--	--	--	--	--	KOG3344	40s ribosomal protein s10
Cluster-342212.100045	466	168064956	XP_001784423.1	386	1.5e-35	predicted protein [Physcomitrella patens]>gi|162664040|gb|EDQ50775.1| predicted protein [Physcomitrella patens]	--	--	--	--	--	K02951	RP-S12e, RPS12	small subunit ribosomal protein S12e	http://www.genome.jp/dbget-bin/www_bget?ko:K02951	P25398	379	1.4e-35	40S ribosomal protein S12 OS=Homo sapiens GN=RPS12 PE=1 SV=3	PF03710	Glutamate-ammonia ligase adenylyltransferase	--	--	GO:0008882	[glutamate-ammonia-ligase] adenylyltransferase activity	GO:0005622	intracellular	KOG3406	40S ribosomal protein S12
Cluster-342212.145830	556	529159578	AGS56672.1	817	1.9e-85	beta-tubulin type 1 isoform 4, partial [Aulacantha scolymantha]>gi|529159580|gb|AGS56673.1| beta-tubulin type 1 isoform 5, partial [Aulacantha scolymantha]	32994371	AK109162.1	468	0	Oryza sativa Japonica Group cDNA clone:002-155-G09, full insert sequence	K07375	TUBB	tubulin beta	http://www.genome.jp/dbget-bin/www_bget?ko:K07375	Q91240	848	7e-90	Tubulin beta chain OS=Pseudopleuronectes americanus PE=2 SV=1	PF00091	Tubulin/FtsZ family, GTPase domain	--	--	GO:0003924	GTPase activity	--	--	KOG1375	Beta tubulin
Cluster-342212.133717	511	--	--	--	--	--	--	--	--	--	--	--	--	--	--	--	--	--	--	--	--	--	--	--	--	--	--	--	--
Cluster-232968.2	354	303277633	XP_003058110.1	247	1.5e-19	profilin [Micromonas pusilla CCMP1545]>gi|226460767|gb|EEH58061.1| profilin [Micromonas pusilla CCMP1545]	--	--	--	--	--	K05759	PFN	profilin	http://www.genome.jp/dbget-bin/www_bget?ko:K05759	Q95VF7	245	3.7e-20	Profilin-1B OS=Acanthamoeba castellanii PE=1 SV=3	PF00020	TNFR/NGFR cysteine-rich region	--	--	GO:0005515	protein binding	GO:0044424	intracellular part	KOG1755	Profilin
Cluster-342212.188319	561	--	--	--	--	--	--	--	--	--	--	--	--	--	--	--	--	--	--	PF00839//PF11522	Cysteine rich repeat//Yeast phosphatidylinositol-4-OH kinase Pik1	--	--	GO:0016773	phosphotransferase activity, alcohol group as acceptor	GO:0016020	membrane	--	--
Cluster-342212.147965	922	242075806	XP_002447839.1	353	2.1e-31	hypothetical protein SORBIDRAFT_06g016670 [Sorghum bicolor]>gi|241939022|gb|EES12167.1| hypothetical protein SORBIDRAFT_06g016670 [Sorghum bicolor]	--	--	--	--	--	--	--	--	--	Q99JH1	178	5.7e-12	Ribonuclease P protein subunit p25-like protein OS=Mus musculus GN=Rpp25l PE=1 SV=1	PF01918//PF12328	Alba//Rpp20 subunit of nuclear RNase MRP and P	GO:0008033//GO:0051252	tRNA processing//regulation of RNA metabolic process	GO:0003676//GO:0004526	nucleic acid binding//ribonuclease P activity	GO:0030677//GO:0005634	ribonuclease P complex//nucleus	--	--
Cluster-370549.0	1740	168004880	XP_001755139.1	796	1.7e-82	predicted protein [Physcomitrella patens]>gi|162693732|gb|EDQ80083.1| predicted protein [Physcomitrella patens]	758986159	XM_011393746.1	59	1.43741e-19	Ustilago maydis 521 hypothetical protein partial mRNA	--	--	--	--	Q9URX1	871	4.7e-92	UNC93-like protein C922.05c OS=Schizosaccharomyces pombe (strain 972 / ATCC 24843) GN=SPAC922.05c PE=3 SV=1	PF07690	Major Facilitator Superfamily	GO:0055085	transmembrane transport	--	--	GO:0016021	integral component of membrane	--	--
Cluster-342212.129481	843	--	--	--	--	--	--	--	--	--	--	--	--	--	--	--	--	--	--	PF06403	Lamprin	--	--	GO:0005198	structural molecule activity	GO:0005578	proteinaceous extracellular matrix	--	--
Cluster-342212.44685	4827	586747268	XP_006850809.1	783	1.5e-80	PREDICTED: vacuolar protein-sorting-associated protein 11 homolog [Amborella trichopoda]>gi|548854480|gb|ERN12390.1| hypothetical protein AMTR_s00025p00115250 [Amborella trichopoda]	299752726	XM_001841152.2	378	0	Coprinopsis cinerea okayama7#130 KQ# vacuolar membrane protein, mRNA	--	--	--	--	Q91W86	968	7.4e-103	Vacuolar protein sorting-associated protein 11 homolog OS=Mus musculus GN=Vps11 PE=1 SV=3	PF14634//PF17122//PF13639//PF13414//PF00097//PF01213//PF00637	zinc-RING finger domain//Zinc-finger//Ring finger domain//TPR repeat//Zinc finger, C3HC4 type (RING finger)//Adenylate cyclase associated (CAP) N terminal//Region in Clathrin and VPS	GO:0016192//GO:0007010//GO:0006886	vesicle-mediated transport//cytoskeleton organization//intracellular protein transport	GO:0008270//GO:0003779//GO:0005515//GO:0046872	zinc ion binding//actin binding//protein binding//metal ion binding	--	--	KOG2114	Vacuolar assembly/sorting protein PEP5/VPS11
Cluster-279888.0	2210	188496900	BAG32349.1	622	3.2e-62	glucan binding protein-1 [Actinophrys sol]	--	--	--	--	--	--	--	--	--	Q8N0N3	668	2.1e-68	Beta-1,3-glucan-binding protein OS=Penaeus monodon PE=2 SV=1	PF00722	Glycosyl hydrolases family 16	GO:0005975	carbohydrate metabolic process	GO:0004553	hydrolase activity, hydrolyzing O-glycosyl compounds	--	--	--	--
Cluster-342212.41347	2070	698789406	XP_009827735.1	192	2.2e-12	hypothetical protein H257_04805 [Aphanomyces astaci]>gi|574117582|gb|ETV83064.1| hypothetical protein H257_04805 [Aphanomyces astaci]	--	--	--	--	--	K09355	PBX1	pre-B-cell leukemia transcription factor 1	http://www.genome.jp/dbget-bin/www_bget?ko:K09355	Q6DIF3	220	1.7e-16	Homeobox protein meis3 OS=Xenopus tropicalis GN=meis3 PE=2 SV=2	PF00365//PF00046//PF05920	Phosphofructokinase//Homeobox domain//Homeobox KN domain	GO:0006098//GO:0006012//GO:0006355//GO:0006094//GO:0006013//GO:0006096//GO:0006000	pentose-phosphate shunt//galactose metabolic process//regulation of transcription, DNA-templated//gluconeogenesis//mannose metabolic process//glycolytic process//fructose metabolic process	GO:0003677//GO:0003872	DNA binding//6-phosphofructokinase activity	GO:0005945	6-phosphofructokinase complex	KOG0773	Transcription factor MEIS1 and related HOX domain proteins
Cluster-308791.0	1045	551556920	XP_005765542.1	734	1.5e-75	short-chain dehydrogenase/reductase [Emiliania huxleyi CCMP1516]>gi|485615565|gb|EOD13113.1| short-chain dehydrogenase/reductase [Emiliania huxleyi CCMP1516]	--	--	--	--	--	--	--	--	--	Q6P5L8	813	1.5e-85	Hydroxysteroid dehydrogenase-like protein 2 OS=Danio rerio GN=hsdl2 PE=2 SV=1	PF01073//PF02882//PF02826//PF00106//PF12242	3-beta hydroxysteroid dehydrogenase/isomerase family//Tetrahydrofolate dehydrogenase/cyclohydrolase, NAD(P)-binding domain//D-isomer specific 2-hydroxyacid dehydrogenase, NAD binding domain//short chain dehydrogenase//NAD(P)H binding domain of trans-2-enoyl-CoA reductase	GO:0009396//GO:0008152//GO:0008209//GO:0055114//GO:0046487//GO:0006694//GO:0008207//GO:0008210	folic acid-containing compound biosynthetic process//metabolic process//androgen metabolic process//oxidation-reduction process//glyoxylate metabolic process//steroid biosynthetic process//C21-steroid hormone metabolic process//estrogen metabolic process	GO:0016491//GO:0003824//GO:0051287//GO:0004488//GO:0016616//GO:0003854	oxidoreductase activity//catalytic activity//NAD binding//methylenetetrahydrofolate dehydrogenase (NADP+) activity//oxidoreductase activity, acting on the CH-OH group of donors, NAD or NADP as acceptor//3-beta-hydroxy-delta5-steroid dehydrogenase activity	--	--	KOG0725	Reductases with broad range of substrate specificities
Cluster-342212.186493	3924	545371287	XP_005650220.1	1237	2.7e-133	si-synthase [Coccomyxa subellipsoidea C-169]>gi|384252200|gb|EIE25676.1| si-synthase [Coccomyxa subellipsoidea C-169]	628292638	XM_007758996.1	50	3.30005e-14	Cladophialophora yegresii CBS 114405 citrate synthase, mitochondrial partial mRNA	K01647	CS, gltA	citrate synthase	http://www.genome.jp/dbget-bin/www_bget?ko:K01647	A4H9H8	1267	1.3e-137	Probable citrate synthase, mitochondrial OS=Leishmania braziliensis GN=LbrM18_V2.0760 PE=3 SV=1	PF00285	Citrate synthase	--	--	GO:0016740//GO:0046912	transferase activity//transferase activity, transferring acyl groups, acyl groups converted into alkyl on transfer	--	--	KOG2617	Citrate synthase
Cluster-342212.103065	606	--	--	--	--	--	--	--	--	--	--	--	--	--	--	--	--	--	--	--	--	--	--	--	--	--	--	--	--
Cluster-342212.122421	906	--	--	--	--	--	--	--	--	--	--	--	--	--	--	--	--	--	--	--	--	--	--	--	--	--	--	--	--
Cluster-342212.143659	430	--	--	--	--	--	--	--	--	--	--	--	--	--	--	--	--	--	--	--	--	--	--	--	--	--	--	--	--
Cluster-342212.165763	3151	145344703	XP_001416866.1	399	3.3e-36	Ribosomal protein S20, component of cytosolic 80S ribosome and 40S small subunit [Ostreococcus lucimarinus CCE9901]>gi|144577092|gb|ABO95159.1| Ribosomal protein S20, component of cytosolic 80S ribosome and 40S small subunit [Ostreococcus lucimarinus CCE9901]	--	--	--	--	--	K02969	RP-S20e, RPS20	small subunit ribosomal protein S20e	http://www.genome.jp/dbget-bin/www_bget?ko:K02969	P60866	390	5.1e-36	40S ribosomal protein S20 OS=Homo sapiens GN=RPS20 PE=1 SV=1	PF00010	Helix-loop-helix DNA-binding domain	GO:0042254//GO:0006412	ribosome biogenesis//translation	GO:0003735//GO:0003723//GO:0046983	structural constituent of ribosome//RNA binding//protein dimerization activity	GO:0015935//GO:0005840	small ribosomal subunit//ribosome	KOG0900	40S ribosomal protein S20
Cluster-342212.172581	1921	544215353	XP_005537822.1	743	2.6e-76	cytochrome c reductase cytochrome c1 subunit [Cyanidioschyzon merolae strain 10D]>gi|449018384|dbj|BAM81786.1| cytochrome c reductase cytochrome c1 subunit [Cyanidioschyzon merolae strain 10D]	--	--	--	--	--	K00413	CYC1, CYT1, petC	ubiquinol-cytochrome c reductase cytochrome c1 subunit	http://www.genome.jp/dbget-bin/www_bget?ko:K00413	P00125	789	1.7e-82	Cytochrome c1, heme protein, mitochondrial OS=Bos taurus GN=CYC1 PE=1 SV=2	PF00034//PF02167//PF13442	Cytochrome c//Cytochrome C1 family//Cytochrome C oxidase, cbb3-type, subunit III	GO:0006118	obsolete electron transport	GO:0009055//GO:0020037	electron carrier activity//heme binding	--	--	KOG3052	Cytochrome c1
Cluster-204257.0	1159	--	--	--	--	--	--	--	--	--	--	--	--	--	--	--	--	--	--	PF01392	Fz domain	--	--	GO:0005515	protein binding	--	--	--	--
Cluster-342212.82410	1679	326496380	BAJ94652.1	1349	1.2e-146	predicted protein [Hordeum vulgare subsp. vulgare]	599349615	XM_007390811.1	381	0	Phanerochaete carnosa HHB-10118-sp hypothetical protein (PHACADRAFT_248083), mRNA	K04536	GNB1	guanine nucleotide-binding protein G(I)/G(S)/G(T) subunit beta-1	http://www.genome.jp/dbget-bin/www_bget?ko:K04536	O14435	1310	5.7e-143	Guanine nucleotide-binding protein subunit beta OS=Cryphonectria parasitica GN=GB-1 PE=3 SV=1	PF00400	WD domain, G-beta repeat	--	--	GO:0005515	protein binding	--	--	KOG0286	G-protein beta subunit
Cluster-342212.23977	795	--	--	--	--	--	--	--	--	--	--	--	--	--	--	--	--	--	--	PF07730	Histidine kinase	GO:0000160//GO:0016310	phosphorelay signal transduction system//phosphorylation	GO:0000155//GO:0046983	phosphorelay sensor kinase activity//protein dimerization activity	GO:0016021//GO:0009365	integral component of membrane//protein histidine kinase complex	--	--
Cluster-187102.7	1213	326496380	BAJ94652.1	1253	1.2e-135	predicted protein [Hordeum vulgare subsp. vulgare]	170042643	XM_001848976.1	309	1.05382e-158	Culex quinquefasciatus guanine nucleotide-binding protein subunit beta 1, mRNA	K04536	GNB1	guanine nucleotide-binding protein G(I)/G(S)/G(T) subunit beta-1	http://www.genome.jp/dbget-bin/www_bget?ko:K04536	O45040	1656	3.1e-183	Guanine nucleotide-binding protein G(I)/G(S)/G(T) subunit beta-1 OS=Homarus americanus GN=GBETA1 PE=2 SV=1	PF00400	WD domain, G-beta repeat	--	--	GO:0005515	protein binding	--	--	KOG0286	G-protein beta subunit
Cluster-342212.86990	642	695434330	XP_009531399.1	433	7.6e-41	putative glycosyl hydrolase family 7 protein [Phytophthora sojae]>gi|348674151|gb|EGZ13970.1| putative glycosyl hydrolase family 7 protein [Phytophthora sojae]	--	--	--	--	--	--	--	--	--	P13860	559	2.6e-56	Exoglucanase 1 OS=Phanerochaete chrysosporium GN=CBH1 PE=2 SV=1	PF00840	Glycosyl hydrolase family 7	GO:0005975	carbohydrate metabolic process	GO:0004553	hydrolase activity, hydrolyzing O-glycosyl compounds	--	--	--	--
Cluster-342212.223505	3310	460387424	XP_004239377.1	594	8.4e-59	PREDICTED: galactose oxidase-like [Solanum lycopersicum]	299738315	XM_001838216.2	623	0	Coprinopsis cinerea okayama7#130 ]# copper radical oxidase, mRNA	--	--	--	--	D4AUF1	2292	1.5e-256	WSC domain-containing protein ARB_07867 OS=Arthroderma benhamiae (strain ATCC MYA-4681 / CBS 112371) GN=ARB_07867 PE=1 SV=1	PF02038//PF03253//PF03185	ATP1G1/PLM/MAT8 family//Urea transporter//Calcium-activated potassium channel, beta subunit	GO:0006813//GO:0006811//GO:0015840//GO:0071918	potassium ion transport//ion transport//urea transport//urea transmembrane transport	GO:0015204//GO:0005216//GO:0015269	urea transmembrane transporter activity//ion channel activity//calcium-activated potassium channel activity	GO:0016021//GO:0016020	integral component of membrane//membrane	KOG4157	beta-1,6-N-acetylglucosaminyltransferase, contains WSC domain
Cluster-137921.0	1033	--	--	--	--	--	--	--	--	--	--	--	--	--	--	--	--	--	--	--	--	--	--	--	--	--	--	--	--
Cluster-342212.83935	626	--	--	--	--	--	--	--	--	--	--	--	--	--	--	--	--	--	--	PF04632	Fusaric acid resistance protein family	GO:0006810	transport	--	--	GO:0005886	plasma membrane	--	--
Cluster-342212.52754	918	--	--	--	--	--	--	--	--	--	--	--	--	--	--	J4VWM7	144	5e-08	FAD-dependent monooxygenase OpS4 OS=Beauveria bassiana (strain ARSEF 2860) GN=OpS4 PE=1 SV=1	PF02065//PF01494	Melibiase//FAD binding domain	GO:0046486//GO:0006012//GO:0005975//GO:0001575	glycerolipid metabolic process//galactose metabolic process//carbohydrate metabolic process//globoside metabolic process	GO:0071949//GO:0004557	FAD binding//alpha-galactosidase activity	--	--	--	--
Cluster-278235.0	1371	635362634	CCI48665.1	1094	3.6e-117	unnamed protein product [Albugo candida]	--	--	--	--	--	K07513	ACAA1	acetyl-CoA acyltransferase 1	http://www.genome.jp/dbget-bin/www_bget?ko:K07513	Q3T0R7	1222	7.4e-133	3-ketoacyl-CoA thiolase, mitochondrial OS=Bos taurus GN=ACAA2 PE=2 SV=1	PF00108//PF02803	Thiolase, N-terminal domain//Thiolase, C-terminal domain	GO:0008152	metabolic process	GO:0016747	transferase activity, transferring acyl groups other than amino-acyl groups	--	--	KOG1391	Acetyl-CoA acetyltransferase
Cluster-234754.0	351	--	--	--	--	--	--	--	--	--	--	--	--	--	--	--	--	--	--	PF02535	ZIP Zinc transporter	GO:0030001//GO:0055085	metal ion transport//transmembrane transport	GO:0046873	metal ion transmembrane transporter activity	GO:0016020	membrane	--	--
Cluster-305898.1	1383	551663758	XP_005834643.1	1273	6.4e-138	hypothetical protein GUITHDRAFT_159541 [Guillardia theta CCMP2712]>gi|428178789|gb|EKX47663.1| hypothetical protein GUITHDRAFT_159541 [Guillardia theta CCMP2712]	808372516	XM_012335946.1	103	3.94532e-44	Pseudozyma hubeiensis SY62 hypothetical protein partial mRNA	K03257	EIF4A	translation initiation factor 4A	http://www.genome.jp/dbget-bin/www_bget?ko:K03257	O62591	1567	7.4e-173	Probable eukaryotic initiation factor 4A OS=Leishmania major GN=LmjF.01.0770 PE=3 SV=1	PF00270//PF00579	DEAD/DEAH box helicase//tRNA synthetases class I (W and Y)	GO:0006418	tRNA aminoacylation for protein translation	GO:0005524//GO:0004812//GO:0000166//GO:0003676	ATP binding//aminoacyl-tRNA ligase activity//nucleotide binding//nucleic acid binding	--	--	KOG0327	Translation initiation factor 4F, helicase subunit (eIF-4A) and related helicases
Cluster-342212.153207	936	855305201	XP_012895341.1	230	3.8e-17	uncharacterized protein [Blastocystis hominis]>gi|855305317|ref|XP_012895379.1| uncharacterized protein [Blastocystis hominis]>gi|855305323|ref|XP_012895381.1| uncharacterized protein [Blastocystis hominis]>gi|300175750|emb|CBK21293.2| unnamed protein product [Blastocystis hominis]>gi|300175788|emb|CBK21331.2| unnamed protein product [Blastocystis hominis]>gi|300175790|emb|CBK21333.2| unnamed pro…	--	--	--	--	--	K13993	HSP20	HSP20 family protein	http://www.genome.jp/dbget-bin/www_bget?ko:K13993	Q4UKR8	230	5.4e-18	Small heat shock protein C2 OS=Rickettsia felis (strain ATCC VR-1525 / URRWXCal2) GN=hspC2 PE=3 SV=1	--	--	--	--	--	--	--	--	KOG0710	Molecular chaperone (small heat-shock protein Hsp26/Hsp42)
Cluster-264595.0	1122	--	--	--	--	--	--	--	--	--	--	--	--	--	--	--	--	--	--	PF00275	EPSP synthase (3-phosphoshikimate 1-carboxyvinyltransferase)	--	--	GO:0016765	transferase activity, transferring alkyl or aryl (other than methyl) groups	--	--	--	--
Cluster-342212.88585	550	731344627	XP_010683522.1	341	3e-30	PREDICTED: 40S ribosomal protein S26-like [Beta vulgaris subsp. vulgaris]>gi|870854812|gb|KMT06560.1| hypothetical protein BVRB_7g157320 [Beta vulgaris subsp. vulgaris]	636620384	XM_008043136.1	72	2.58215e-27	Trametes versicolor FP-101664 SS1 40S ribosomal protein S26 partial mRNA	K02976	RP-S26e, RPS26	small subunit ribosomal protein S26e	http://www.genome.jp/dbget-bin/www_bget?ko:K02976	Q8LPJ7	329	1e-29	40S ribosomal protein S26-2 OS=Arabidopsis thaliana GN=RPS26B PE=2 SV=2	PF07503//PF01283	HypF finger//Ribosomal protein S26e	GO:0042254//GO:0006412	ribosome biogenesis//translation	GO:0003735//GO:0008270	structural constituent of ribosome//zinc ion binding	GO:0005840//GO:0005622	ribosome//intracellular	KOG1768	40s ribosomal protein S26
Cluster-201807.0	1835	673039357	XP_008873639.1	257	5.5e-20	hypothetical protein H310_09362 [Aphanomyces invadans]>gi|574471069|gb|ETV98078.1| hypothetical protein H310_09362 [Aphanomyces invadans]	--	--	--	--	--	K00232	E1.3.3.6, ACOX1, ACOX3	acyl-CoA oxidase	http://www.genome.jp/dbget-bin/www_bget?ko:K00232	Q9NUZ1	196	9.3e-14	Acyl-coenzyme A oxidase-like protein OS=Homo sapiens GN=ACOXL PE=2 SV=3	PF02770//PF00441	Acyl-CoA dehydrogenase, middle domain//Acyl-CoA dehydrogenase, C-terminal domain	GO:0006118//GO:0055114	obsolete electron transport//oxidation-reduction process	GO:0003995//GO:0016627	acyl-CoA dehydrogenase activity//oxidoreductase activity, acting on the CH-CH group of donors	--	--	KOG0136	Acyl-CoA oxidase
Cluster-342212.134652	750	--	--	--	--	--	--	--	--	--	--	--	--	--	--	--	--	--	--	PF03702//PF04888	Uncharacterised protein family (UPF0075)//Secretion system effector C (SseC) like family	GO:0009254//GO:0009405//GO:0006040	peptidoglycan turnover//pathogenesis//amino sugar metabolic process	GO:0005524//GO:0016773	ATP binding//phosphotransferase activity, alcohol group as acceptor	--	--	--	--
Cluster-342212.49188	1491	--	--	--	--	--	--	--	--	--	--	--	--	--	--	--	--	--	--	--	--	--	--	--	--	--	--	--	--
Cluster-342212.49187	1549	--	--	--	--	--	--	--	--	--	--	--	--	--	--	--	--	--	--	PF00335	Tetraspanin family	--	--	--	--	GO:0016021	integral component of membrane	--	--
Cluster-171427.0	393	--	--	--	--	--	--	--	--	--	--	--	--	--	--	--	--	--	--	--	--	--	--	--	--	--	--	--	--
Cluster-226558.0	5269	255546055	XP_002514087.1	601	2.1e-59	myosin XI, putative [Ricinus communis]>gi|223546543|gb|EEF48041.1| myosin XI, putative [Ricinus communis]	299746572	XM_001840570.2	708	0	Coprinopsis cinerea okayama7#130 chitin synthase 8, mRNA	--	--	--	--	Q4P9K9	3726	0	Chitin synthase 8 OS=Ustilago maydis (strain 521 / FGSC 9021) GN=CHS8 PE=3 SV=1	PF15724//PF15291//PF00063	TMEM119 family//Dermcidin, antibiotic peptide//Myosin head (motor domain)	GO:0031640//GO:0001503	killing of cells of other organism//ossification	GO:0005524//GO:0008233//GO:0003774	ATP binding//peptidase activity//motor activity	GO:0005576//GO:0016459	extracellular region//myosin complex	KOG4229	Myosin VII, myosin IXB and related myosins
Cluster-342212.26792	862	--	--	--	--	--	--	--	--	--	--	--	--	--	--	P06810	272	6.7e-23	Cytochrome c oxidase polypeptide 5, mitochondrial OS=Neurospora crassa (strain ATCC 24698 / 74-OR23-1A / CBS 708.71 / DSM 1257 / FGSC 987) GN=cya-4 PE=3 SV=2	PF06390//PF02936	Neuroendocrine-specific golgi protein P55 (NESP55)//Cytochrome c oxidase subunit IV	GO:0015992//GO:0071107//GO:0006123	proton transport//response to parathyroid hormone//mitochondrial electron transport, cytochrome c to oxygen	GO:0004129	cytochrome-c oxidase activity	GO:0045277	respiratory chain complex IV	--	--
Cluster-365680.0	1108	--	--	--	--	--	--	--	--	--	--	--	--	--	--	--	--	--	--	--	--	--	--	--	--	--	--	--	--
Cluster-342212.133700	1543	635370530	CCI41276.1	157	1.8e-08	unnamed protein product [Albugo candida]	--	--	--	--	--	--	--	--	--	P57756	256	8.6e-21	Ficolin-2 OS=Rattus norvegicus GN=Fcn2 PE=2 SV=1	--	--	--	--	--	--	--	--	--	--
Cluster-342212.159521	860	--	--	--	--	--	--	--	--	--	--	--	--	--	--	--	--	--	--	--	--	--	--	--	--	--	--	--	--
Cluster-342212.98243	982	595906259	XP_007214112.1	155	2e-08	hypothetical protein PRUPE_ppa017121mg, partial [Prunus persica]>gi|462409977|gb|EMJ15311.1| hypothetical protein PRUPE_ppa017121mg, partial [Prunus persica]	299755451	XM_001828621.2	42	2.25449e-10	Coprinopsis cinerea okayama7#130 ### hypothetical protein, mRNA	--	--	--	--	--	--	--	--	PF05438	Thyrotropin-releasing hormone (TRH)	GO:0007218//GO:0009755	neuropeptide signaling pathway//hormone-mediated signaling pathway	GO:0005184	neuropeptide hormone activity	GO:0005576	extracellular region	--	--
Cluster-342212.22802	577	--	--	--	--	--	--	--	--	--	--	--	--	--	--	Q02221	183	9.4e-13	Cytochrome c oxidase subunit 6A2, mitochondrial OS=Homo sapiens GN=COX6A2 PE=2 SV=2	PF03133//PF02046	Tubulin-tyrosine ligase family//Cytochrome c oxidase subunit VIa	GO:0006123//GO:0015992//GO:0006464	mitochondrial electron transport, cytochrome c to oxygen//proton transport//cellular protein modification process	GO:0004129	cytochrome-c oxidase activity	GO:0045277//GO:0005751//GO:0005743	respiratory chain complex IV//mitochondrial respiratory chain complex IV//mitochondrial inner membrane	KOG3469	Cytochrome c oxidase, subunit VIa/COX13
Cluster-342212.114087	1582	--	--	--	--	--	--	--	--	--	--	--	--	--	--	--	--	--	--	PF02674//PF06687	Colicin V production protein//SUR7/PalI family	GO:0009403	toxin biosynthetic process	--	--	GO:0016020//GO:0005886	membrane//plasma membrane	--	--
Cluster-342212.92729	461	568834517	XP_006471373.1	239	1.7e-18	PREDICTED: 60S acidic ribosomal protein P2A-like isoform X1 [Citrus sinensis]>gi|568834519|ref|XP_006471374.1| PREDICTED: 60S acidic ribosomal protein P2A-like isoform X2 [Citrus sinensis]>gi|568834521|ref|XP_006471375.1| PREDICTED: 60S acidic ribosomal protein P2A-like isoform X3 [Citrus sinensis]>gi|568834523|ref|XP_006471376.1| PREDICTED: 60S acidic ribosomal protein P2A-like isoform X4 [Citru…	927399924	XM_014090333.1	95	3.5005e-40	Trichoderma atroviride IMI 206040 hypothetical protein mRNA	K02943	RP-LP2, RPLP2	large subunit ribosomal protein LP2	http://www.genome.jp/dbget-bin/www_bget?ko:K02943	Q9C3Z5	253	5.7e-21	60S acidic ribosomal protein P2 OS=Podospora anserina PE=3 SV=1	PF01692	Paramyxovirus non-structural protein C	GO:0030683	evasion or tolerance by virus of host immune response	--	--	--	--	KOG3449	60S acidic ribosomal protein P2
Cluster-46685.1	858	--	--	--	--	--	--	--	--	--	--	--	--	--	--	--	--	--	--	PF08015	Fungal mating-type pheromone	GO:0007165	signal transduction	GO:0000772	mating pheromone activity	GO:0016020	membrane	--	--
Cluster-342212.14526	3136	--	--	--	--	--	--	--	--	--	--	--	--	--	--	C8V8H5	450	5.6e-43	Ino eighty subunit 1 OS=Emericella nidulans (strain FGSC A4 / ATCC 38163 / CBS 112.46 / NRRL 194 / M139) GN=AN10560 PE=3 SV=1	PF00424	REV protein (anti-repression trans-activator protein)	GO:0006355	regulation of transcription, DNA-templated	GO:0003700	transcription factor activity, sequence-specific DNA binding	GO:0042025//GO:0005667	host cell nucleus//transcription factor complex	--	--
Cluster-291267.0	1757	--	--	--	--	--	--	--	--	--	--	--	--	--	--	Q5ATG7	509	4.5e-50	Aspyridones efflux protein apdF OS=Emericella nidulans (strain FGSC A4 / ATCC 38163 / CBS 112.46 / NRRL 194 / M139) GN=apdF PE=2 SV=1	PF07690	Major Facilitator Superfamily	GO:0055085	transmembrane transport	--	--	GO:0016021	integral component of membrane	--	--
Cluster-237697.0	2797	566026851	ETI49762.1	254	1.9e-19	hypothetical protein F443_06538 [Phytophthora parasitica P1569]>gi|570989207|gb|ETP47474.1| hypothetical protein F442_06581 [Phytophthora parasitica P10297]	--	--	--	--	--	--	--	--	--	P40514	528	4.5e-52	Uncharacterized protein YIL067C OS=Saccharomyces cerevisiae (strain ATCC 204508 / S288c) GN=YIL067C PE=1 SV=1	--	--	--	--	--	--	--	--	--	--
Cluster-368069.0	2888	223995563	XP_002287455.1	529	2.5e-51	metalloprotease [Thalassiosira pseudonana CCMP1335]>gi|220976571|gb|EED94898.1| metalloprotease, partial [Thalassiosira pseudonana CCMP1335]	--	--	--	--	--	--	--	--	--	C5P7A7	814	3.2e-85	Extracellular metalloproteinase 10 OS=Coccidioides posadasii (strain C735) GN=MEP10 PE=3 SV=1	PF02128	Fungalysin metallopeptidase (M36)	--	--	GO:0004222//GO:0008270	metalloendopeptidase activity//zinc ion binding	GO:0005615	extracellular space	--	--
Cluster-263266.1	2952	--	--	--	--	--	--	--	--	--	--	--	--	--	--	--	--	--	--	--	--	--	--	--	--	--	--	--	--
Cluster-186507.0	1736	635364279	CCI47247.1	1074	9.6e-115	unnamed protein product [Albugo candida]	675239884	LM993668.1	61	1.10858e-20	Plasmodium yoelii genome assembly PY17X01, chromosome : 14	K13126	PABPC	polyadenylate-binding protein	http://www.genome.jp/dbget-bin/www_bget?ko:K13126	P31209	1072	2.3e-115	Polyadenylate-binding protein, cytoplasmic and nuclear OS=Schizosaccharomyces pombe (strain 972 / ATCC 24843) GN=pab1 PE=1 SV=2	PF16367//PF08777//PF00658//PF00076	RNA recognition motif//RNA binding motif//Poly-adenylate binding protein, unique domain//RNA recognition motif. (a.k.a. RRM, RBD, or RNP domain)	--	--	GO:0003676//GO:0003723	nucleic acid binding//RNA binding	--	--	KOG0123	Polyadenylate-binding protein (RRM superfamily)
Cluster-342212.91410	1502	159488505	XP_001702250.1	150	1.2e-07	hypothetical protein CHLREDRAFT_154229 [Chlamydomonas reinhardtii]>gi|158271287|gb|EDO97110.1| predicted protein [Chlamydomonas reinhardtii]	--	--	--	--	--	--	--	--	--	--	--	--	--	--	--	--	--	--	--	--	--	--	--
Cluster-342212.41358	2418	551545548	XP_005760743.1	1212	1.3e-130	hypothetical protein EMIHUDRAFT_422478 [Emiliania huxleyi CCMP1516]>gi|551605706|ref|XP_005784241.1| putative polyadenylate protein with binding domain [Emiliania huxleyi CCMP1516]>gi|485609313|gb|EOD08314.1| hypothetical protein EMIHUDRAFT_422478 [Emiliania huxleyi CCMP1516]>gi|485637305|gb|EOD31812.1| putative polyadenylate protein with binding domain [Emiliania huxleyi CCMP1516]	299753360	XM_001833172.2	800	0	Coprinopsis cinerea okayama7#130 KQ# polyadenylate-binding protein, mRNA	K13126	PABPC	polyadenylate-binding protein	http://www.genome.jp/dbget-bin/www_bget?ko:K13126	Q4P8R9	1506	1.5e-165	Polyadenylate-binding protein, cytoplasmic and nuclear OS=Ustilago maydis (strain 521 / FGSC 9021) GN=PAB1 PE=3 SV=1	PF03726//PF00076//PF00658//PF02171//PF08777//PF16367//PF08651	Polyribonucleotide nucleotidyltransferase, RNA binding domain//RNA recognition motif. (a.k.a. RRM, RBD, or RNP domain)//Poly-adenylate binding protein, unique domain//Piwi domain//RNA binding motif//RNA recognition motif//DASH complex subunit Duo1	GO:0007067//GO:0006396//GO:0051252	mitotic nuclear division//RNA processing//regulation of RNA metabolic process	GO:0000175//GO:0003676//GO:0003723	3'-5'-exoribonuclease activity//nucleic acid binding//RNA binding	GO:0072686//GO:0042729	mitotic spindle//DASH complex	KOG0123	Polyadenylate-binding protein (RRM superfamily)
Cluster-342212.89822	895	545705917	XP_005705277.1	289	5.3e-24	60S ribosomal protein L27e [Galdieria sulphuraria]>gi|452821730|gb|EME28757.1| 60S ribosomal protein L27e [Galdieria sulphuraria]	--	--	--	--	--	K02901	RP-L27e, RPL27	large subunit ribosomal protein L27e	http://www.genome.jp/dbget-bin/www_bget?ko:K02901	O74538	301	3e-26	60S ribosomal protein L27-B OS=Schizosaccharomyces pombe (strain 972 / ATCC 24843) GN=rpl2702 PE=3 SV=1	PF01777	Ribosomal L27e protein family	GO:0042254//GO:0006412	ribosome biogenesis//translation	GO:0003735	structural constituent of ribosome	GO:0005840//GO:0005622	ribosome//intracellular	KOG3418	60S ribosomal protein L27
Cluster-342212.150697	1451	--	--	--	--	--	--	--	--	--	--	--	--	--	--	O16277	134	1.1e-06	Putative histone H1.6 OS=Caenorhabditis elegans GN=hil-6 PE=3 SV=3	PF00538	linker histone H1 and H5 family	GO:0006334	nucleosome assembly	GO:0003677	DNA binding	GO:0005634//GO:0000786	nucleus//nucleosome	--	--
Cluster-342212.225516	1515	546325696	XP_005718730.1	288	1.2e-23	GDP-fucose transporter [Chondrus crispus]>gi|507115352|emb|CDF38825.1| GDP-fucose transporter [Chondrus crispus]	--	--	--	--	--	--	--	--	--	Q550W6	302	3.9e-26	GDP-fucose transporter 1 OS=Dictyostelium discoideum GN=slc35c1 PE=3 SV=1	PF00892	EamA-like transporter family	--	--	--	--	GO:0016021//GO:0016020	integral component of membrane//membrane	KOG1442	GDP-fucose transporter
Cluster-342212.87790	848	570966616	ETP29735.1	201	8e-14	hypothetical protein F442_21151 [Phytophthora parasitica P10297]	299755236	XM_001828466.2	228	7.76309e-114	Coprinopsis cinerea okayama7#130 ### secreted protein, mRNA	--	--	--	--	D4ATM6	381	1.5e-35	Uncharacterized secreted protein ARB_07590 OS=Arthroderma benhamiae (strain ATCC MYA-4681 / CBS 112371) GN=ARB_07590 PE=1 SV=1	--	--	--	--	--	--	--	--	--	--
Cluster-312552.0	550	--	--	--	--	--	--	--	--	--	--	--	--	--	--	--	--	--	--	PF02298	Plastocyanin-like domain	GO:0006118	obsolete electron transport	GO:0009055	electron carrier activity	--	--	--	--
Cluster-342212.126902	6447	570988390	ETP46819.1	637	1.7e-63	hypothetical protein F442_07016 [Phytophthora parasitica P10297]	598016170	XM_007338675.1	146	2.34105e-67	Auricularia subglabra TFB-10046 SS5 kinesin-domain-containing protein partial mRNA	K10395	KIF4_21_27	kinesin family member 4/21/27	http://www.genome.jp/dbget-bin/www_bget?ko:K10395	Q6S003	659	6.7e-67	Kinesin-related protein 8 OS=Dictyostelium discoideum GN=kif8 PE=2 SV=1	PF08702//PF00225	Fibrinogen alpha/beta chain family//Kinesin motor domain	GO:0051258//GO:0007018//GO:0007017//GO:0030168//GO:0007165	protein polymerization//microtubule-based movement//microtubule-based process//platelet activation//signal transduction	GO:0005524//GO:0005102//GO:0003777//GO:0008017//GO:0030674	ATP binding//receptor binding//microtubule motor activity//microtubule binding//protein binding, bridging	GO:0005874//GO:0045298//GO:0005577	microtubule//tubulin complex//fibrinogen complex	KOG0244	Kinesin-like protein
Cluster-342212.53514	2175	357133318	XP_003568273.1	755	1.2e-77	PREDICTED: putative respiratory burst oxidase homolog protein H [Brachypodium distachyon]	299746250	XM_001837796.2	760	0	Coprinopsis cinerea okayama7#130 NADPH oxidase isoform 2, mRNA	--	--	--	--	Q9XYS3	912	1e-96	Superoxide-generating NADPH oxidase heavy chain subunit A OS=Dictyostelium discoideum GN=noxA PE=2 SV=1	PF08022//PF00175//PF08030	FAD-binding domain//Oxidoreductase NAD-binding domain//Ferric reductase NAD binding domain	GO:0055114	oxidation-reduction process	GO:0016491	oxidoreductase activity	--	--	KOG0039	Ferric reductase, NADH/NADPH oxidase and related proteins
Cluster-342212.198586	2616	695392111	XP_009520235.1	232	6.3e-17	hypothetical protein PHYSODRAFT_486323 [Phytophthora sojae]>gi|348685132|gb|EGZ24947.1| hypothetical protein PHYSODRAFT_486323 [Phytophthora sojae]	--	--	--	--	--	--	--	--	--	Q01200	194	2.3e-13	Protein priA OS=Lentinula edodes GN=priA PE=2 SV=1	PF07562//PF00020//PF09057	Nine Cysteines Domain of family 3 GPCR//TNFR/NGFR cysteine-rich region//Second Mitochondria-derived Activator of Caspases	GO:0007186//GO:0006915//GO:0006919	G-protein coupled receptor signaling pathway//apoptotic process//activation of cysteine-type endopeptidase activity involved in apoptotic process	GO:0005515//GO:0004930	protein binding//G-protein coupled receptor activity	GO:0005739	mitochondrion	--	--
Cluster-174413.0	679	545706655	XP_005705644.1	433	8e-41	60S ribosomal protein L13e [Galdieria sulphuraria]>gi|452822101|gb|EME29124.1| 60S ribosomal protein L13e [Galdieria sulphuraria]	290995766	XM_002680408.1	467	0	Naegleria gruberi 60S ribosomal protein L13, mRNA	K02873	RP-L13e, RPL13	large subunit ribosomal protein L13e	http://www.genome.jp/dbget-bin/www_bget?ko:K02873	P41126	404	2.6e-38	60S ribosomal protein L13 OS=Drosophila melanogaster GN=RpL13 PE=1 SV=1	PF01294	Ribosomal protein L13e	GO:0006412//GO:0042254	translation//ribosome biogenesis	GO:0003735	structural constituent of ribosome	GO:0005840//GO:0005622	ribosome//intracellular	KOG3295	60S Ribosomal protein L13
Cluster-342212.178593	1783	545711747	XP_005708179.1	719	1.4e-73	MFS transporter, PHS family, inorganic phosphate transporter [Galdieria sulphuraria]>gi|452824658|gb|EME31659.1| MFS transporter, PHS family, inorganic phosphate transporter [Galdieria sulphuraria]	927418241	XM_014099477.1	63	8.80665e-22	Trichoderma virens Gv29-8 hypothetical protein mRNA	--	--	--	--	O94342	879	5.7e-93	Probable metabolite transport protein C1271.09 OS=Schizosaccharomyces pombe (strain 972 / ATCC 24843) GN=SPBC1271.09 PE=3 SV=1	PF07690//PF00083	Major Facilitator Superfamily//Sugar (and other) transporter	GO:0055085	transmembrane transport	GO:0022857	transmembrane transporter activity	GO:0016021	integral component of membrane	KOG0252	Inorganic phosphate transporter
Cluster-342212.90590	1551	--	--	--	--	--	299745724	XM_001831863.2	39	1.67685e-08	Coprinopsis cinerea okayama7#130 # hypothetical protein, mRNA	--	--	--	--	--	--	--	--	PF09000	Cytotoxic	GO:0009405	pathogenesis	GO:0003723//GO:0016788//GO:0043022	RNA binding//hydrolase activity, acting on ester bonds//ribosome binding	--	--	--	--
Cluster-342212.48605	708	116783944	ABK23152.1	889	1.1e-93	unknown [Picea sitchensis]>gi|116792247|gb|ABK26290.1| unknown [Picea sitchensis]	--	--	--	--	--	K02985	RP-S3e, RPS3	small subunit ribosomal protein S3e	http://www.genome.jp/dbget-bin/www_bget?ko:K02985	Q9FJA6	853	2.3e-90	40S ribosomal protein S3-3 OS=Arabidopsis thaliana GN=RPS3C PE=1 SV=1	PF07650	KH domain	GO:0006412//GO:0042254	translation//ribosome biogenesis	GO:0003723//GO:0003735	RNA binding//structural constituent of ribosome	GO:0005840//GO:0015935	ribosome//small ribosomal subunit	KOG3181	40S ribosomal protein S3
Cluster-291728.0	1942	674237273	KFK30038.1	177	1.1e-10	hypothetical protein AALP_AA7G209300 [Arabis alpina]	--	--	--	--	--	K10661	MARCH6, DOA10	E3 ubiquitin-protein ligase MARCH6	http://www.genome.jp/dbget-bin/www_bget?ko:K10661	O60103	175	2.7e-11	ERAD-associated E3 ubiquitin-protein ligase doa10 OS=Schizosaccharomyces pombe (strain 972 / ATCC 24843) GN=doa10 PE=1 SV=1	PF12906	RING-variant domain	--	--	GO:0008270	zinc ion binding	--	--	KOG1609	Protein involved in mRNA turnover and stability
Cluster-367518.0	3434	--	--	--	--	--	--	--	--	--	--	--	--	--	--	Q9V4P1	473	1.3e-45	Anillin OS=Drosophila melanogaster GN=scra PE=1 SV=3	--	--	--	--	--	--	--	--	KOG3640	Actin binding protein Anillin
Cluster-262065.2	1435	545369313	XP_005649406.1	681	3e-69	hypothetical protein COCSUDRAFT_41138 [Coccomyxa subellipsoidea C-169]>gi|384251384|gb|EIE24862.1| hypothetical protein COCSUDRAFT_41138 [Coccomyxa subellipsoidea C-169]	169863294	XM_001838217.1	386	0	Coprinopsis cinerea okayama7#130 ]# NCP1, mRNA	--	--	--	--	--	--	--	--	--	--	--	--	--	--	--	--	--	--
Cluster-342212.88798	1049	673038949	XP_008873435.1	300	3.3e-25	hypothetical protein H310_09199 [Aphanomyces invadans]>gi|574470865|gb|ETV97874.1| hypothetical protein H310_09199 [Aphanomyces invadans]	1004689316	XM_007437456.2	35	1.87682e-06	PREDICTED: Python bivittatus high mobility group box 3 (HMGB3), mRNA	K09272	SSRP1	structure-specific recognition protein 1	http://www.genome.jp/dbget-bin/www_bget?ko:K09272	Q24537	527	2.2e-52	High mobility group protein DSP1 OS=Drosophila melanogaster GN=Dsp1 PE=2 SV=1	--	--	--	--	--	--	--	--	KOG0381	HMG box-containing protein
Cluster-342212.86989	1079	675211961	XP_008914865.1	1022	6.4e-109	hypothetical protein PPTG_18587 [Phytophthora parasitica INRA-310]>gi|566008967|gb|ETI31878.1| hypothetical protein F443_21201 [Phytophthora parasitica P1569]>gi|567946428|gb|ETK72238.1| hypothetical protein L915_20616 [Phytophthora parasitica]>gi|567975143|gb|ETL25712.1| hypothetical protein L916_20477 [Phytophthora parasitica]>gi|568004603|gb|ETL78921.1| hypothetical protein L917_20350 [Phytoph…	343446891	JF351415.1	191	3.68266e-93	Uncultured fungus clone NTS049287d5 cellobiohydrolase I (cbhI) gene, partial cds	--	--	--	--	Q0CMT2	1165	2.4e-126	Probable 1,4-beta-D-glucan cellobiohydrolase B OS=Aspergillus terreus (strain NIH 2624 / FGSC A1156) GN=cbhB PE=3 SV=1	PF00840	Glycosyl hydrolase family 7	GO:0005975	carbohydrate metabolic process	GO:0004553	hydrolase activity, hydrolyzing O-glycosyl compounds	--	--	--	--
Cluster-342212.135725	817	675168515	XP_008893142.1	256	3.2e-20	hypothetical protein PPTG_01563 [Phytophthora parasitica INRA-310]>gi|675168517|ref|XP_008893143.1| hypothetical protein, variant [Phytophthora parasitica INRA-310]>gi|566022442|gb|ETI45353.1| hypothetical protein F443_10080 [Phytophthora parasitica P1569]>gi|566022443|gb|ETI45354.1| hypothetical protein, variant [Phytophthora parasitica P1569]>gi|567959708|gb|ETK85276.1| hypothetical protein L91…	--	--	--	--	--	K13126	PABPC	polyadenylate-binding protein	http://www.genome.jp/dbget-bin/www_bget?ko:K13126	Q9EPH8	311	1.9e-27	Polyadenylate-binding protein 1 OS=Rattus norvegicus GN=Pabpc1 PE=1 SV=1	PF00737//PF00658	Photosystem II 10 kDa phosphoprotein//Poly-adenylate binding protein, unique domain	GO:0050821//GO:0015979	protein stabilization//photosynthesis	GO:0003723//GO:0042301	RNA binding//phosphate ion binding	GO:0009523//GO:0016020	photosystem II//membrane	KOG0123	Polyadenylate-binding protein (RRM superfamily)
Cluster-342212.92451	906	470142729	XP_004307051.1	576	2.8e-57	PREDICTED: 60S ribosomal protein L7a-2-like [Fragaria vesca subsp. vesca]	--	--	--	--	--	K02936	RP-L7Ae, RPL7A	large subunit ribosomal protein L7Ae	http://www.genome.jp/dbget-bin/www_bget?ko:K02936	P0DKK7	545	1.6e-54	60S ribosomal protein L7a-2 OS=Oryza sativa subsp. japonica GN=RPL7A-2 PE=2 SV=1	--	--	--	--	--	--	--	--	KOG3166	60S ribosomal protein L7A
Cluster-342212.98109	445	545710127	XP_005707372.1	516	1.2e-50	40S ribosomal protein S15A [Galdieria sulphuraria]>gi|452823845|gb|EME30852.1| 40S ribosomal protein S15A [Galdieria sulphuraria]	--	--	--	--	--	K02957	RP-S15Ae, RPS15A	small subunit ribosomal protein S15Ae	http://www.genome.jp/dbget-bin/www_bget?ko:K02957	Q76I82	515	2.3e-51	40S ribosomal protein S15a OS=Bos taurus GN=RPS15A PE=2 SV=1	PF00410	Ribosomal protein S8	GO:0042254//GO:0006412	ribosome biogenesis//translation	GO:0003735	structural constituent of ribosome	GO:0005840	ribosome	KOG1754	40S ribosomal protein S15/S22
Cluster-334411.1	383	--	--	--	--	--	--	--	--	--	--	--	--	--	--	--	--	--	--	--	--	--	--	--	--	--	--	--	--
Cluster-342212.24746	1570	255590391	XP_002535255.1	301	3.7e-25	Phthalate transporter, putative [Ricinus communis]>gi|223523632|gb|EEF27130.1| Phthalate transporter, putative [Ricinus communis]	--	--	--	--	--	--	--	--	--	Q9US44	603	5.1e-61	Uncharacterized transporter C1002.16c OS=Schizosaccharomyces pombe (strain 972 / ATCC 24843) GN=SPAC1002.16c PE=3 SV=1	PF07690	Major Facilitator Superfamily	GO:0055085	transmembrane transport	--	--	GO:0016021	integral component of membrane	--	--
Cluster-280433.0	622	--	--	--	--	--	--	--	--	--	--	--	--	--	--	--	--	--	--	PF08015//PF01215	Fungal mating-type pheromone//Cytochrome c oxidase subunit Vb	GO:0015992//GO:0006123//GO:0007165	proton transport//mitochondrial electron transport, cytochrome c to oxygen//signal transduction	GO:0000772//GO:0004129	mating pheromone activity//cytochrome-c oxidase activity	GO:0005740//GO:0045277//GO:0016020	mitochondrial envelope//respiratory chain complex IV//membrane	--	--
Cluster-342212.81855	1508	--	--	--	--	--	--	--	--	--	--	--	--	--	--	--	--	--	--	PF08040//PF16714	MNLL subunit//Tyrosyl-tRNA synthetase C-terminal domain	GO:0006118	obsolete electron transport	GO:0003954//GO:0003723	NADH dehydrogenase activity//RNA binding	GO:0005739	mitochondrion	--	--
Cluster-342212.187237	1621	552835046	XP_005848886.1	284	3.6e-23	hypothetical protein CHLNCDRAFT_144273 [Chlorella variabilis]>gi|307108544|gb|EFN56784.1| hypothetical protein CHLNCDRAFT_144273 [Chlorella variabilis]	--	--	--	--	--	--	--	--	--	Q09788	332	1.4e-29	Alkali-sensitive linkage protein 1 OS=Schizosaccharomyces pombe (strain 972 / ATCC 24843) GN=asl1 PE=1 SV=1	--	--	--	--	--	--	--	--	--	--
Cluster-269219.0	2197	188496900	BAG32349.1	624	1.8e-62	glucan binding protein-1 [Actinophrys sol]	--	--	--	--	--	--	--	--	--	Q8N0N3	649	3.3e-66	Beta-1,3-glucan-binding protein OS=Penaeus monodon PE=2 SV=1	PF00722	Glycosyl hydrolases family 16	GO:0005975	carbohydrate metabolic process	GO:0004553	hydrolase activity, hydrolyzing O-glycosyl compounds	--	--	--	--
Cluster-342212.66832	1665	--	--	--	--	--	--	--	--	--	--	--	--	--	--	--	--	--	--	PF01284//PF04145	Membrane-associating domain//Ctr copper transporter family	GO:0035434//GO:0006825	copper ion transmembrane transport//copper ion transport	GO:0005375	copper ion transmembrane transporter activity	GO:0016020//GO:0016021	membrane//integral component of membrane	--	--
Cluster-342212.142661	1715	6094429	O22347.1	2150	1.6e-239	RecName: Full=Tubulin alpha-1 chain; AltName: Full=Alpha-1-tubulin [Eleusine indica]>gi|2511531|gb|AAC05717.1| alpha tubulin 1 [Eleusine indica]>gi|3163944|emb|CAA06618.1| alpha-tubulin 1 [Eleusine indica]>gi|379054864|gb|AFC88823.1| putative tubulin alpha-1 chain [Miscanthus sinensis]>gi|379054884|gb|AFC88833.1| tubulin alpha-1 chain [Miscanthus sinensis]	2511530	AF008120.1	1173	0	Eleusine indica alpha tubulin 1 (TUA1) mRNA, complete cds	K07374	TUBA	tubulin alpha	http://www.genome.jp/dbget-bin/www_bget?ko:K07374	O22347	2150	2.3e-240	Tubulin alpha-1 chain OS=Eleusine indica GN=TUBA1 PE=2 SV=1	PF00091	Tubulin/FtsZ family, GTPase domain	GO:0007018//GO:0051258//GO:0006184	microtubule-based movement//protein polymerization//obsolete GTP catabolic process	GO:0003924//GO:0005198//GO:0005525	GTPase activity//structural molecule activity//GTP binding	GO:0005737//GO:0005874	cytoplasm//microtubule	KOG1376	Alpha tubulin
Cluster-342212.136358	2695	545370525	XP_005649894.1	1292	7.9e-140	polyadenylate binding protein [Coccomyxa subellipsoidea C-169]>gi|384251873|gb|EIE25350.1| polyadenylate binding protein [Coccomyxa subellipsoidea C-169]	241831488	XM_002414815.1	142	1.62553e-65	Ixodes scapularis apoptosis-promoting RNA-binding protein TIA-1/TIAR, putative, mRNA	K13126	PABPC	polyadenylate-binding protein	http://www.genome.jp/dbget-bin/www_bget?ko:K13126	P11940	1678	1.9e-185	Polyadenylate-binding protein 1 OS=Homo sapiens GN=PABPC1 PE=1 SV=2	PF05739//PF08777//PF00658//PF00076//PF02190//PF16367	SNARE domain//RNA binding motif//Poly-adenylate binding protein, unique domain//RNA recognition motif. (a.k.a. RRM, RBD, or RNP domain)//ATP-dependent protease La (LON) substrate-binding domain//RNA recognition motif	GO:0006508//GO:0006510	proteolysis//obsolete ATP-dependent proteolysis	GO:0003723//GO:0005515//GO:0004176//GO:0003676	RNA binding//protein binding//ATP-dependent peptidase activity//nucleic acid binding	--	--	KOG0123	Polyadenylate-binding protein (RRM superfamily)
Cluster-322015.0	913	326530920	BAK01258.1	273	3.8e-22	predicted protein [Hordeum vulgare subsp. vulgare]	--	--	--	--	--	--	--	--	--	P78929	269	1.6e-22	Cofilin OS=Schizosaccharomyces pombe (strain 972 / ATCC 24843) GN=cof1 PE=1 SV=1	PF00241	Cofilin/tropomyosin-type actin-binding protein	--	--	GO:0003779	actin binding	GO:0005622	intracellular	KOG1735	Actin depolymerizing factor
Cluster-255343.0	825	--	--	--	--	--	--	--	--	--	--	--	--	--	--	--	--	--	--	PF04625	DEC-1 protein, N-terminal region	GO:0007304	chorion-containing eggshell formation	GO:0005213	structural constituent of chorion	GO:0005576//GO:0042600	extracellular region//chorion	--	--
Cluster-342212.192658	1955	546323129	XP_005717985.1	1029	1.8e-109	TPR repeat-containing protein [Chondrus crispus]>gi|507114572|emb|CDF38116.1| TPR repeat-containing protein [Chondrus crispus]	299755196	XM_001828439.2	512	0	Coprinopsis cinerea okayama7#130 ### TPR-containing protein Mql1, mRNA	--	--	--	--	O60184	1402	1.4e-153	General transcriptional corepressor ssn6 OS=Schizosaccharomyces pombe (strain 972 / ATCC 24843) GN=ssn6 PE=1 SV=1	PF13174//PF13371//PF00515//PF13176//PF13414//PF13374//PF13181	Tetratricopeptide repeat//Tetratricopeptide repeat//Tetratricopeptide repeat//Tetratricopeptide repeat//TPR repeat//Tetratricopeptide repeat//Tetratricopeptide repeat	--	--	GO:0005515	protein binding	--	--	KOG1124	FOG: TPR repeat
Cluster-342212.91508	1579	--	--	--	--	--	--	--	--	--	--	--	--	--	--	--	--	--	--	--	--	--	--	--	--	--	--	--	--
Cluster-308461.0	2492	695065355	XP_009421263.1	610	8.8e-61	PREDICTED: mannosyl-oligosaccharide 1,2-alpha-mannosidase MNS3-like [Musa acuminata subsp. malaccensis]	695563752	XM_009550807.1	35	4.5444e-06	Heterobasidion irregulare TC 32-1 glycoside hydrolase family 47 protein partial mRNA	--	--	--	--	Q9P7C3	456	9e-44	Endoplasmic reticulum mannosyl-oligosaccharide 1,2-alpha-mannosidase OS=Schizosaccharomyces pombe (strain 972 / ATCC 24843) GN=SPAC2E1P5.01c PE=1 SV=2	PF01532	Glycosyl hydrolase family 47	GO:0005975	carbohydrate metabolic process	GO:0004571//GO:0005509	mannosyl-oligosaccharide 1,2-alpha-mannosidase activity//calcium ion binding	GO:0016020	membrane	KOG2431	1, 2-alpha-mannosidase
Cluster-342212.194033	504	527196189	EPS65151.1	500	1e-48	nucleoside diphosphate kinase [Genlisea aurea]	961376381	KT755101.1	67	1.41552e-24	Pseudodiaptomus poplesia clone PPON73(2) nucleoside diphosphate kinase A 1 mRNA, complete cds	K00940	ndk, NME	nucleoside-diphosphate kinase	http://www.genome.jp/dbget-bin/www_bget?ko:K00940	P22392	506	2.9e-50	Nucleoside diphosphate kinase B OS=Homo sapiens GN=NME2 PE=1 SV=1	PF01701//PF00334	Photosystem I reaction centre subunit IX / PsaJ//Nucleoside diphosphate kinase	GO:0006228//GO:0006183//GO:0006144//GO:0006206//GO:0015979//GO:0006241//GO:0006165	UTP biosynthetic process//GTP biosynthetic process//purine nucleobase metabolic process//pyrimidine nucleobase metabolic process//photosynthesis//CTP biosynthetic process//nucleoside diphosphate phosphorylation	GO:0004550	nucleoside diphosphate kinase activity	GO:0009522	photosystem I	KOG0888	Nucleoside diphosphate kinase
Cluster-205311.0	2860	695414007	XP_009526189.1	184	2.5e-11	hypothetical protein PHYSODRAFT_264405 [Phytophthora sojae]>gi|348677314|gb|EGZ17131.1| hypothetical protein PHYSODRAFT_264405 [Phytophthora sojae]	--	--	--	--	--	--	--	--	--	Q01713	195	1.9e-13	Krueppel-like factor 9 OS=Rattus norvegicus GN=Klf9 PE=2 SV=1	PF00096//PF13465	Zinc finger, C2H2 type//Zinc-finger double domain	--	--	GO:0046872	metal ion binding	--	--	KOG1721	FOG: Zn-finger
Cluster-342212.23644	290	--	--	--	--	--	--	--	--	--	--	--	--	--	--	--	--	--	--	--	--	--	--	--	--	--	--	--	--
Cluster-248319.0	885	--	--	--	--	--	--	--	--	--	--	--	--	--	--	--	--	--	--	PF07544//PF08702//PF06810//PF09334//PF08941//PF04513//PF01496//PF00435//PF06424//PF04632	RNA polymerase II transcription mediator complex subunit 9//Fibrinogen alpha/beta chain family//Phage minor structural protein GP20//tRNA synthetases class I (M)//USP8 interacting//Baculovirus polyhedron envelope protein, PEP, C terminus//V-type ATPase 116kDa subunit family//Spectrin repeat//PRP1 splicing factor, N-terminal//Fusaric acid resistance protein family	GO:0006810//GO:0030168//GO:0016567//GO:0015991//GO:0006357//GO:0015992//GO:0000398//GO:0006418//GO:0007165//GO:0051258	transport//platelet activation//protein ubiquitination//ATP hydrolysis coupled proton transport//regulation of transcription from RNA polymerase II promoter//proton transport//mRNA splicing, via spliceosome//tRNA aminoacylation for protein translation//signal transduction//protein polymerization	GO:0005102//GO:0005515//GO:0000166//GO:0030674//GO:0001104//GO:0005198//GO:0004812//GO:0031386//GO:0016881//GO:0005524//GO:0015078	receptor binding//protein binding//nucleotide binding//protein binding, bridging//RNA polymerase II transcription cofactor activity//structural molecule activity//aminoacyl-tRNA ligase activity//protein tag//acid-amino acid ligase activity//ATP binding//hydrogen ion transmembrane transporter activity	GO:0005634//GO:0016592//GO:0005886//GO:0005577//GO:0019031//GO:0019028//GO:0033179	nucleus//mediator complex//plasma membrane//fibrinogen complex//viral envelope//viral capsid//proton-transporting V-type ATPase, V0 domain	--	--
Cluster-273863.1	800	303272217	XP_003055470.1	330	8.3e-29	predicted protein [Micromonas pusilla CCMP1545]>gi|226463444|gb|EEH60722.1| predicted protein [Micromonas pusilla CCMP1545]	299754032	XM_001833656.2	237	7.25381e-119	Coprinopsis cinerea okayama7#130 KQ# nascent polypeptide-associated complex subunit alpha, mRNA	K03626	EGD2, NACA	nascent polypeptide-associated complex subunit alpha	http://www.genome.jp/dbget-bin/www_bget?ko:K03626	Q94518	313	1.1e-27	Nascent polypeptide-associated complex subunit alpha OS=Drosophila melanogaster GN=Nacalpha PE=1 SV=2	--	--	--	--	--	--	--	--	KOG2239	Transcription factor containing NAC and TS-N domains
Cluster-342212.173327	522	--	--	--	--	--	--	--	--	--	--	--	--	--	--	--	--	--	--	--	--	--	--	--	--	--	--	--	--
Cluster-288595.0	4843	--	--	--	--	--	--	--	--	--	--	--	--	--	--	--	--	--	--	PF00641//PF06337//PF05927//PF13545//PF00240	Zn-finger in Ran binding protein and others//DUSP domain//Penaeidin//Crp-like helix-turn-helix domain//Ubiquitin family	GO:0006508//GO:0016579//GO:0006355	proteolysis//protein deubiquitination//regulation of transcription, DNA-templated	GO:0004843//GO:0008061//GO:0005515//GO:0008270//GO:0003677	ubiquitin-specific protease activity//chitin binding//protein binding//zinc ion binding//DNA binding	GO:0005737	cytoplasm	--	--
Cluster-342212.27170	1341	223996343	XP_002287845.1	650	1.1e-65	aldo-keto oxidoreductase [Thalassiosira pseudonana CCMP1335]>gi|220976961|gb|EED95288.1| aldo-keto oxidoreductase [Thalassiosira pseudonana CCMP1335]	169867028	XM_001840044.1	570	0	Coprinopsis cinerea okayama7#130 ### D-xylose reductase, mRNA	K00011	E1.1.1.21, AKR1	aldehyde reductase	http://www.genome.jp/dbget-bin/www_bget?ko:K00011	Q5BGA7	1099	1.3e-118	Probable NAD(P)H-dependent D-xylose reductase xyl1 OS=Emericella nidulans (strain FGSC A4 / ATCC 38163 / CBS 112.46 / NRRL 194 / M139) GN=xyl1 PE=3 SV=1	--	--	--	--	--	--	--	--	KOG1577	Aldo/keto reductase family proteins
Cluster-342212.102935	755	388519609	AFK47866.1	372	1.1e-33	unknown [Medicago truncatula]	--	--	--	--	--	K12462	ARHGDI, RHOGDI	Rho GDP-dissociation inhibitor	http://www.genome.jp/dbget-bin/www_bget?ko:K12462	O14224	357	8.2e-33	Rho GDP-dissociation inhibitor OS=Schizosaccharomyces pombe (strain 972 / ATCC 24843) GN=SPAC6F12.06 PE=1 SV=1	PF02115	RHO protein GDP dissociation inhibitor	--	--	GO:0005094	Rho GDP-dissociation inhibitor activity	GO:0005737	cytoplasm	KOG3205	Rho GDP-dissociation inhibitor
Cluster-342212.69980	467	--	--	--	--	--	--	--	--	--	--	--	--	--	--	P01040	219	5.1e-17	Cystatin-A OS=Homo sapiens GN=CSTA PE=1 SV=1	PF01960//PF00031	ArgJ family//Cystatin domain	GO:0006526//GO:0042967	arginine biosynthetic process//acyl-carrier-protein biosynthetic process	GO:0004358//GO:0004869	glutamate N-acetyltransferase activity//cysteine-type endopeptidase inhibitor activity	--	--	--	--
Cluster-342212.53337	1954	673015026	XP_008861474.1	1055	1.7e-112	hypothetical protein H310_00449 [Aphanomyces invadans]>gi|574483072|gb|ETW10063.1| hypothetical protein H310_00449 [Aphanomyces invadans]	--	--	--	--	--	K16748	BBS5	Bardet-Biedl syndrome 5 protein	http://www.genome.jp/dbget-bin/www_bget?ko:K16748	Q7ZWB7	956	7.4e-102	Bardet-Biedl syndrome 5 protein homolog OS=Danio rerio GN=bbs5 PE=2 SV=1	PF07289//PF11605	Protein of unknown function (DUF1448)//Vacuolar protein sorting protein 36 Vps36	--	--	GO:0043130//GO:0032266	ubiquitin binding//phosphatidylinositol-3-phosphate binding	GO:0034464	BBSome	--	--
Cluster-278143.0	967	633913615	KDD77142.1	664	1.9e-67	DNA topoisomerase I [Helicosporidium sp. ATCC 50920]	116180839	XM_001220268.1	36	4.8029e-07	Chaetomium globosum CBS 148.51 hypothetical protein (CHGG_01048) partial mRNA	K15102	SLC25A3, PHC, PIC	solute carrier family 25 (mitochondrial phosphate transporter), member 3	http://www.genome.jp/dbget-bin/www_bget?ko:K15102	Q9FMU6	637	3.6e-65	Mitochondrial phosphate carrier protein 3, mitochondrial OS=Arabidopsis thaliana GN=MPT3 PE=1 SV=1	--	--	--	--	--	--	--	--	KOG0767	Mitochondrial phosphate carrier protein
Cluster-342212.112207	1171	545706852	XP_005705742.1	607	9.2e-61	40S ribosomal protein S6e [Galdieria sulphuraria]>gi|452822200|gb|EME29222.1| 40S ribosomal protein S6e [Galdieria sulphuraria]	--	--	--	--	--	K02991	RP-S6e, RPS6	small subunit ribosomal protein S6e	http://www.genome.jp/dbget-bin/www_bget?ko:K02991	P39017	592	7.2e-60	40S ribosomal protein S6 OS=Xenopus laevis GN=rps6 PE=2 SV=1	PF01092	Ribosomal protein S6e	GO:0042254//GO:0006412	ribosome biogenesis//translation	GO:0003735	structural constituent of ribosome	GO:0005622//GO:0005840	intracellular//ribosome	KOG1646	40S ribosomal protein S6
Cluster-342212.153147	705	--	--	--	--	--	--	--	--	--	--	--	--	--	--	--	--	--	--	PF02535//PF02724	ZIP Zinc transporter//CDC45-like protein	GO:0006270//GO:0030001//GO:0055085	DNA replication initiation//metal ion transport//transmembrane transport	GO:0046873	metal ion transmembrane transporter activity	GO:0016020	membrane	--	--
Cluster-342212.27308	681	727417254	XP_010412704.1	507	2.1e-49	PREDICTED: autophagy-related protein 8d-like [Camelina sativa]	343426319	FQ311439.1	158	5.04777e-75	Sporisorium reilianum SRZ2 chromosome 18 complete DNA sequence	K08341	GABARAP, ATG8, LC3	GABA(A) receptor-associated protein	http://www.genome.jp/dbget-bin/www_bget?ko:K08341	P87068	643	5.1e-66	Autophagy-related protein 8 OS=Laccaria bicolor GN=ATG8 PE=2 SV=2	PF04110	Ubiquitin-like autophagy protein Apg12	GO:0000045	autophagosome assembly	--	--	GO:0005737	cytoplasm	KOG1654	Microtubule-associated anchor protein involved in autophagy and membrane trafficking
Cluster-342212.158606	1681	168042023	XP_001773489.1	1501	2.9e-164	predicted protein [Physcomitrella patens]>gi|162675191|gb|EDQ61689.1| predicted protein, partial [Physcomitrella patens]	158300599	XM_320478.4	297	6.89948e-152	Anopheles gambiae str. PEST AGAP012048-PA (AgaP_AGAP012048) mRNA, complete cds	K01647	CS, gltA	citrate synthase	http://www.genome.jp/dbget-bin/www_bget?ko:K01647	Q16P20	1796	2.5e-199	Probable citrate synthase 2, mitochondrial OS=Aedes aegypti GN=AAEL011789 PE=3 SV=1	PF00285	Citrate synthase	GO:0006099//GO:0044262//GO:0046487	tricarboxylic acid cycle//cellular carbohydrate metabolic process//glyoxylate metabolic process	GO:0046912//GO:0004108	transferase activity, transferring acyl groups, acyl groups converted into alkyl on transfer//citrate (Si)-synthase activity	--	--	KOG2617	Citrate synthase
Cluster-342212.234568	3446	326502070	BAK06527.1	1402	1.8e-152	predicted protein [Hordeum vulgare subsp. vulgare]	--	--	--	--	--	--	--	--	--	O04514	750	1e-77	Oligopeptide transporter 2 OS=Arabidopsis thaliana GN=OPT2 PE=2 SV=2	PF03169	OPT oligopeptide transporter protein	GO:0055085	transmembrane transport	--	--	--	--	KOG2262	Sexual differentiation process protein ISP4
Cluster-342212.181691	5877	661897286	CDO98998.1	169	2.8e-09	unnamed protein product [Coffea canephora]	299749315	XM_001838617.2	89	1.03536e-35	Coprinopsis cinerea okayama7#130 ### hypothetical protein, mRNA	--	--	--	--	P38148	307	4e-26	Dual specificity protein phosphatase PPS1 OS=Saccharomyces cerevisiae (strain ATCC 204508 / S288c) GN=PPS1 PE=3 SV=1	PF00102//PF00782//PF05965	Protein-tyrosine phosphatase//Dual specificity phosphatase, catalytic domain//F/Y rich C-terminus	GO:0006470//GO:0006570	protein dephosphorylation//tyrosine metabolic process	GO:0008138//GO:0004725	protein tyrosine/serine/threonine phosphatase activity//protein tyrosine phosphatase activity	GO:0005634	nucleus	KOG1716	Dual specificity phosphatase
Cluster-342212.220711	694	743779516	XP_010920228.1	772	4e-80	PREDICTED: 60S ribosomal protein L8-1 [Elaeis guineensis]	--	--	--	--	--	K02938	RP-L8e, RPL8	large subunit ribosomal protein L8e	http://www.genome.jp/dbget-bin/www_bget?ko:K02938	P29766	764	4.8e-80	60S ribosomal protein L8 OS=Solanum lycopersicum GN=RPL8 PE=2 SV=1	PF03947//PF00181	Ribosomal Proteins L2, C-terminal domain//Ribosomal Proteins L2, RNA binding domain	GO:0042254//GO:0006412	ribosome biogenesis//translation	GO:0003735	structural constituent of ribosome	GO:0005840//GO:0005622	ribosome//intracellular	KOG2309	60s ribosomal protein L2/L8
Cluster-342212.190142	2183	--	--	--	--	--	--	--	--	--	--	--	--	--	--	--	--	--	--	--	--	--	--	--	--	--	--	--	--
Cluster-342212.98682	603	313586529	ADR71275.1	450	7.6e-43	60S ribosomal protein L17B [Hevea brasiliensis]	--	--	--	--	--	K02880	RP-L17e, RPL17	large subunit ribosomal protein L17e	http://www.genome.jp/dbget-bin/www_bget?ko:K02880	O14339	439	2e-42	60S ribosomal protein L17-A OS=Schizosaccharomyces pombe (strain 972 / ATCC 24843) GN=rpl1701 PE=3 SV=1	PF00237//PF07544	Ribosomal protein L22p/L17e//RNA polymerase II transcription mediator complex subunit 9	GO:0006357//GO:0042254//GO:0006412	regulation of transcription from RNA polymerase II promoter//ribosome biogenesis//translation	GO:0001104//GO:0003735	RNA polymerase II transcription cofactor activity//structural constituent of ribosome	GO:0016592//GO:0005840	mediator complex//ribosome	KOG3353	60S ribosomal protein L22
Cluster-342212.49451	437	302830135	XP_002946634.1	464	1.3e-44	component of cytosolic 80S ribosome and 40S small subunit [Volvox carteri f. nagariensis]>gi|300268380|gb|EFJ52561.1| component of cytosolic 80S ribosome and 40S small subunit [Volvox carteri f. nagariensis]	116641706	CT837045.1	260	6.26938e-132	Oryza sativa (indica cultivar-group) cDNA clone:OSIGCRA116I22, full insert sequence	K02989	RP-S5e, RPS5	small subunit ribosomal protein S5e	http://www.genome.jp/dbget-bin/www_bget?ko:K02989	P49041	481	2e-47	40S ribosomal protein S5 OS=Caenorhabditis elegans GN=rps-5 PE=3 SV=1	--	--	GO:0042254//GO:0006412	ribosome biogenesis//translation	GO:0003735//GO:0003723	structural constituent of ribosome//RNA binding	GO:0015935//GO:0005840	small ribosomal subunit//ribosome	KOG3291	Ribosomal protein S7
Cluster-239686.0	1524	223995827	XP_002287587.1	755	8.2e-78	ornithine decarboxylase [Thalassiosira pseudonana CCMP1335]>gi|220976703|gb|EED95030.1| ornithine decarboxylase, partial [Thalassiosira pseudonana CCMP1335]	--	--	--	--	--	K01581	E4.1.1.17, ODC1, speC, speF	ornithine decarboxylase	http://www.genome.jp/dbget-bin/www_bget?ko:K01581	P11926	749	5.8e-78	Ornithine decarboxylase OS=Homo sapiens GN=ODC1 PE=1 SV=2	PF00278//PF02784	Pyridoxal-dependent decarboxylase, C-terminal sheet domain//Pyridoxal-dependent decarboxylase, pyridoxal binding domain	--	--	GO:0003824	catalytic activity	--	--	KOG0622	Ornithine decarboxylase
Cluster-332910.0	485	326524259	BAK00513.1	184	4.3e-12	predicted protein [Hordeum vulgare subsp. vulgare]	--	--	--	--	--	K02896	RP-L24e, RPL24	large subunit ribosomal protein L24e	http://www.genome.jp/dbget-bin/www_bget?ko:K02896	Q8BP67	195	3.2e-14	60S ribosomal protein L24 OS=Mus musculus GN=Rpl24 PE=1 SV=2	--	--	--	--	--	--	--	--	KOG1722	60s ribosomal protein L24
Cluster-297337.0	4571	--	--	--	--	--	--	--	--	--	--	--	--	--	--	--	--	--	--	PF12678	RING-H2 zinc finger	--	--	GO:0008270	zinc ion binding	--	--	--	--
Cluster-342212.99727	555	813199600	XP_012209371.1	382	5.3e-35	hypothetical protein SPRG_14840 [Saprolegnia parasitica CBS 223.65]>gi|641525479|gb|KDO19932.1| hypothetical protein SPRG_14840 [Saprolegnia parasitica CBS 223.65]	768425694	XM_011555559.1	85	1.54707e-34	PREDICTED: Plutella xylostella 60S ribosomal protein L21 (LOC105385223), mRNA	K02889	RP-L21e, RPL21	large subunit ribosomal protein L21e	http://www.genome.jp/dbget-bin/www_bget?ko:K02889	P46778	436	4.1e-42	60S ribosomal protein L21 OS=Homo sapiens GN=RPL21 PE=1 SV=2	PF01157	Ribosomal protein L21e	GO:0042254//GO:0006412	ribosome biogenesis//translation	GO:0003735	structural constituent of ribosome	GO:0005840//GO:0005622	ribosome//intracellular	KOG1732	60S ribosomal protein L21
Cluster-342212.236253	271	694448813	XP_009350203.1	221	1.2e-16	PREDICTED: 40S ribosomal protein S28-B [Pyrus x bretschneideri]	--	--	--	--	--	K02979	RP-S28e, RPS28	small subunit ribosomal protein S28e	http://www.genome.jp/dbget-bin/www_bget?ko:K02979	P0CT80	226	4.6e-18	40S ribosomal protein S28-B OS=Schizosaccharomyces pombe (strain 972 / ATCC 24843) GN=rps2802 PE=3 SV=1	PF01200	Ribosomal protein S28e	GO:0006412//GO:0042254	translation//ribosome biogenesis	GO:0003735	structural constituent of ribosome	GO:0005622//GO:0005840	intracellular//ribosome	KOG3502	40S ribosomal protein S28
Cluster-342212.125259	455	168066133	XP_001784997.1	536	6.1e-53	predicted protein [Physcomitrella patens]>gi|168066153|ref|XP_001785007.1| predicted protein [Physcomitrella patens]>gi|168066157|ref|XP_001785009.1| predicted protein [Physcomitrella patens]>gi|162663414|gb|EDQ50178.1| predicted protein [Physcomitrella patens]>gi|162663424|gb|EDQ50188.1| predicted protein [Physcomitrella patens]>gi|162663426|gb|EDQ50190.1| predicted protein [Physcomitrella paten…	299755455	XM_001828625.2	288	1.77777e-147	Coprinopsis cinerea okayama7#130 ADP/ATP carrier protein, partial mRNA	K05863	SLC25A4S, ANT	solute carrier family 25 (mitochondrial adenine nucleotide translocator), member 4/5/6/31	http://www.genome.jp/dbget-bin/www_bget?ko:K05863	O49447	516	1.8e-51	ADP,ATP carrier protein 3, mitochondrial OS=Arabidopsis thaliana GN=AAC3 PE=1 SV=1	--	--	GO:0006810	transport	--	--	GO:0016020	membrane	KOG0749	Mitochondrial ADP/ATP carrier proteins
Cluster-294165.0	2272	--	--	--	--	--	--	--	--	--	--	--	--	--	--	--	--	--	--	--	--	--	--	--	--	--	--	--	--
Cluster-286890.0	1864	--	--	--	--	--	--	--	--	--	--	--	--	--	--	--	--	--	--	PF13180//PF00595	PDZ domain//PDZ domain (Also known as DHR or GLGF)	--	--	GO:0005515	protein binding	--	--	--	--
Cluster-342212.42979	1483	694453367	XP_009351420.1	159	1e-08	PREDICTED: uncharacterized protein LOC103942945, partial [Pyrus x bretschneideri]	299752300	XM_002911697.1	71	2.60533e-26	Coprinopsis cinerea okayama7#130 SeqLit hypothetical protein, mRNA	--	--	--	--	--	--	--	--	--	--	--	--	--	--	--	--	--	--
Cluster-304183.1	437	729290825	XP_010534064.1	365	3.9e-33	PREDICTED: 60S ribosomal protein L35a-3-like [Tarenaya hassleriana]	169846948	XM_001830136.1	179	6.68154e-87	Coprinopsis cinerea okayama7#130 60S ribosomal protein L33, partial mRNA	K02917	RP-L35Ae, RPL35A	large subunit ribosomal protein L35Ae	http://www.genome.jp/dbget-bin/www_bget?ko:K02917	P41056	364	7.3e-34	60S ribosomal protein L33-B OS=Saccharomyces cerevisiae (strain ATCC 204508 / S288c) GN=RPL33B PE=1 SV=2	PF01247//PF01782	Ribosomal protein L35Ae//RimM N-terminal domain	GO:0006412//GO:0006364//GO:0042254	translation//rRNA processing//ribosome biogenesis	GO:0003735	structural constituent of ribosome	GO:0005840//GO:0005622	ribosome//intracellular	KOG0887	60S ribosomal protein L35A/L37
Cluster-215306.0	801	--	--	--	--	--	--	--	--	--	--	--	--	--	--	--	--	--	--	--	--	--	--	--	--	--	--	--	--
Cluster-342212.131558	1027	593687727	XP_007144523.1	993	1.4e-105	hypothetical protein PHAVU_007G162900g [Phaseolus vulgaris]>gi|561017713|gb|ESW16517.1| hypothetical protein PHAVU_007G162900g [Phaseolus vulgaris]	--	--	--	--	--	K02930	RP-L4e, RPL4	large subunit ribosomal protein L4e	http://www.genome.jp/dbget-bin/www_bget?ko:K02930	Q9XF97	942	1.6e-100	60S ribosomal protein L4 OS=Prunus armeniaca GN=RPL4 PE=2 SV=1	PF00573	Ribosomal protein L4/L1 family	GO:0006412//GO:0042254	translation//ribosome biogenesis	GO:0003735	structural constituent of ribosome	GO:0005840	ribosome	KOG1475	Ribosomal protein RPL1/RPL2/RL4L4
Cluster-342212.182851	718	242087095	XP_002439380.1	341	3.9e-30	hypothetical protein SORBIDRAFT_09g005460 [Sorghum bicolor]>gi|241944665|gb|EES17810.1| hypothetical protein SORBIDRAFT_09g005460 [Sorghum bicolor]	--	--	--	--	--	K02873	RP-L13e, RPL13	large subunit ribosomal protein L13e	http://www.genome.jp/dbget-bin/www_bget?ko:K02873	P41126	347	1.1e-31	60S ribosomal protein L13 OS=Drosophila melanogaster GN=RpL13 PE=1 SV=1	PF01294	Ribosomal protein L13e	GO:0006412//GO:0042254	translation//ribosome biogenesis	GO:0003735	structural constituent of ribosome	GO:0044444//GO:0005840//GO:0030529//GO:0043232//GO:0005622	cytoplasmic part//ribosome//intracellular ribonucleoprotein complex//intracellular non-membrane-bounded organelle//intracellular	KOG3295	60S Ribosomal protein L13
Cluster-342212.4347	1858	676391693	XP_009039124.1	137	4.6e-06	hypothetical protein AURANDRAFT_65897 [Aureococcus anophagefferens]>gi|323450290|gb|EGB06172.1| hypothetical protein AURANDRAFT_65897 [Aureococcus anophagefferens]	--	--	--	--	--	--	--	--	--	--	--	--	--	PF06027	Solute carrier family 35	GO:0006810	transport	--	--	GO:0016021	integral component of membrane	--	--
Cluster-342212.184719	832	--	--	--	--	--	--	--	--	--	--	--	--	--	--	--	--	--	--	--	--	--	--	--	--	--	--	--	--
Cluster-231250.1	526	747057344	XP_011074970.1	334	1.9e-29	PREDICTED: elongation factor 1-gamma-like [Sesamum indicum]	--	--	--	--	--	K03233	EEF1G	elongation factor 1-gamma	http://www.genome.jp/dbget-bin/www_bget?ko:K03233	P34715	345	1.4e-31	Elongation factor 1-gamma OS=Trypanosoma cruzi PE=2 SV=1	PF00647//PF10716	Elongation factor 1 gamma, conserved domain//NADH dehydrogenase transmembrane subunit	GO:0006414//GO:0006118//GO:0006448//GO:0055114	translational elongation//obsolete electron transport//regulation of translational elongation//oxidation-reduction process	GO:0016655//GO:0003746	oxidoreductase activity, acting on NAD(P)H, quinone or similar compound as acceptor//translation elongation factor activity	GO:0005840	ribosome	KOG1627	Translation elongation factor EF-1 gamma
Cluster-287379.0	2298	159482268	XP_001699193.1	1012	2e-107	hypothetical protein CHLREDRAFT_121379 [Chlamydomonas reinhardtii]>gi|158273040|gb|EDO98833.1| predicted protein, partial [Chlamydomonas reinhardtii]	--	--	--	--	--	K00232	E1.3.3.6, ACOX1, ACOX3	acyl-CoA oxidase	http://www.genome.jp/dbget-bin/www_bget?ko:K00232	P07872	1017	7.4e-109	Peroxisomal acyl-coenzyme A oxidase 1 OS=Rattus norvegicus GN=Acox1 PE=1 SV=1	PF01756//PF05294//PF02770//PF00441	Acyl-CoA oxidase//Scorpion short toxin//Acyl-CoA dehydrogenase, middle domain//Acyl-CoA dehydrogenase, C-terminal domain	GO:0044710//GO:0006118//GO:0006635//GO:0006637//GO:0055114//GO:0009405	single-organism metabolic process//obsolete electron transport//fatty acid beta-oxidation//acyl-CoA metabolic process//oxidation-reduction process//pathogenesis	GO:0016627//GO:0003997//GO:0003995	oxidoreductase activity, acting on the CH-CH group of donors//acyl-CoA oxidase activity//acyl-CoA dehydrogenase activity	GO:0005777//GO:0005576	peroxisome//extracellular region	KOG0136	Acyl-CoA oxidase
Cluster-342212.47879	2380	695037657	XP_009406326.1	456	6e-43	PREDICTED: eukaryotic translation initiation factor 3 subunit H {ECO:0000255|HAMAP-Rule:MF_03007}-like [Musa acuminata subsp. malaccensis]	--	--	--	--	--	--	--	--	--	Q4PI64	638	6.7e-65	Eukaryotic translation initiation factor 3 subunit H OS=Ustilago maydis (strain 521 / FGSC 9021) GN=UMAG_00199 PE=3 SV=1	PF00967//PF01398	Barwin family//JAB1/Mov34/MPN/PAD-1 ubiquitin protease	GO:0050832//GO:0042742	defense response to fungus//defense response to bacterium	GO:0005515	protein binding	--	--	KOG1560	Translation initiation factor 3, subunit h (eIF-3h)
Cluster-292074.1	1375	--	--	--	--	--	--	--	--	--	--	--	--	--	--	--	--	--	--	--	--	--	--	--	--	--	--	--	--
Cluster-342212.51975	938	694452823	XP_009351275.1	306	5.9e-26	PREDICTED: heat-stable 19 kDa antigen-like [Pyrus x bretschneideri]	--	--	--	--	--	--	--	--	--	O74238	315	7.6e-28	Protein SnodProt1 OS=Phaeosphaeria nodorum (strain SN15 / ATCC MYA-4574 / FGSC 10173) GN=SNOG_13722 PE=2 SV=1	--	--	--	--	--	--	--	--	--	--
Cluster-228030.1	2745	303276100	XP_003057344.1	1804	3.4e-199	predicted protein [Micromonas pusilla CCMP1545]>gi|226461696|gb|EEH58989.1| predicted protein [Micromonas pusilla CCMP1545]	936685921	XM_014365448.1	200	9.48556e-98	PREDICTED: Trichogramma pretiosum glutamine--fructose-6-phosphate aminotransferase [isomerizing] 2-like (LOC106648515), transcript variant X2, mRNA	K00820	glmS, GFPT	glucosamine--fructose-6-phosphate aminotransferase (isomerizing)	http://www.genome.jp/dbget-bin/www_bget?ko:K00820	P82808	2403	1.7e-269	Glutamine--fructose-6-phosphate aminotransferase [isomerizing] 1 OS=Rattus norvegicus GN=Gfpt1 PE=1 SV=3	PF01380//PF13580	SIS domain//SIS domain	GO:0008152//GO:0005975	metabolic process//carbohydrate metabolic process	GO:0030246	carbohydrate binding	--	--	KOG1268	Glucosamine 6-phosphate synthetases, contain amidotransferase and phosphosugar isomerase domains
Cluster-342212.242036	2356	168021919	XP_001763488.1	420	8.9e-39	predicted protein [Physcomitrella patens]>gi|162685281|gb|EDQ71677.1| predicted protein [Physcomitrella patens]	--	--	--	--	--	--	--	--	--	P75791	449	5.5e-43	Uncharacterized protein YbiU OS=Escherichia coli (strain K12) GN=ybiU PE=1 SV=1	--	--	--	--	--	--	--	--	--	--
Cluster-312699.0	2797	--	--	--	--	--	--	--	--	--	--	--	--	--	--	--	--	--	--	--	--	--	--	--	--	--	--	--	--
Cluster-328974.0	2341	527199190	EPS67062.1	624	2e-62	hypothetical protein M569_07713, partial [Genlisea aurea]	--	--	--	--	--	K07198	PRKAA, AMPK	5'-AMP-activated protein kinase, catalytic alpha subunit	http://www.genome.jp/dbget-bin/www_bget?ko:K07198	Q5R7G9	865	3.2e-91	NUAK family SNF1-like kinase 2 OS=Pongo abelii GN=NUAK2 PE=2 SV=1	PF07714//PF00069//PF06293	Protein tyrosine kinase//Protein kinase domain//Lipopolysaccharide kinase (Kdo/WaaP) family	GO:0006468	protein phosphorylation	GO:0016773//GO:0005524//GO:0004672	phosphotransferase activity, alcohol group as acceptor//ATP binding//protein kinase activity	GO:0016020	membrane	KOG0611	Predicted serine/threonine protein kinase
Cluster-342212.42015	887	--	--	--	--	--	--	--	--	--	--	--	--	--	--	--	--	--	--	PF05864	Chordopoxvirus DNA-directed RNA polymerase 7 kDa polypeptide (RPO7)	GO:0006144//GO:0006351//GO:0006206	purine nucleobase metabolic process//transcription, DNA-templated//pyrimidine nucleobase metabolic process	GO:0003899//GO:0003677	DNA-directed RNA polymerase activity//DNA binding	GO:0005730	nucleolus	--	--
Cluster-342212.118476	822	--	--	--	--	--	--	--	--	--	--	--	--	--	--	--	--	--	--	--	--	--	--	--	--	--	--	--	--
Cluster-342212.100597	1347	110556116	BAE98134.1	154	3.6e-08	chitinase A [Pteris ryukyuensis]	--	--	--	--	--	--	--	--	--	--	--	--	--	--	--	--	--	--	--	--	--	--	--
Cluster-335166.0	1893	326505276	BAK03025.1	494	1.9e-47	predicted protein [Hordeum vulgare subsp. vulgare]	--	--	--	--	--	K01279	TPP1, CLN2	tripeptidyl-peptidase I	http://www.genome.jp/dbget-bin/www_bget?ko:K01279	O14773	473	7.3e-46	Tripeptidyl-peptidase 1 OS=Homo sapiens GN=TPP1 PE=1 SV=2	PF00082//PF09286	Subtilase family//Pro-kumamolisin, activation domain	GO:0006508	proteolysis	GO:0008236//GO:0004252	serine-type peptidase activity//serine-type endopeptidase activity	--	--	--	--
Cluster-311835.1	803	658004972	XP_008337622.1	530	5.3e-52	PREDICTED: 60S ribosomal protein L6-like [Malus domestica]>gi|658033672|ref|XP_008352349.1| PREDICTED: 60S ribosomal protein L6-like [Malus domestica]	--	--	--	--	--	K02934	RP-L6e, RPL6	large subunit ribosomal protein L6e	http://www.genome.jp/dbget-bin/www_bget?ko:K02934	P34091	524	3.8e-52	60S ribosomal protein L6 OS=Mesembryanthemum crystallinum GN=RPL6 PE=2 SV=1	PF01159//PF03868	Ribosomal protein L6e//Ribosomal protein L6, N-terminal domain	GO:0042254//GO:0006412	ribosome biogenesis//translation	GO:0003735	structural constituent of ribosome	GO:0005622//GO:0005840	intracellular//ribosome	KOG1694	60s ribosomal protein L6
Cluster-342212.180542	2634	--	--	--	--	--	--	--	--	--	--	--	--	--	--	--	--	--	--	--	--	--	--	--	--	--	--	--	--
Cluster-164624.0	3413	--	--	--	--	--	--	--	--	--	--	--	--	--	--	--	--	--	--	--	--	--	--	--	--	--	--	--	--
Cluster-342212.52732	1315	--	--	--	--	--	--	--	--	--	--	--	--	--	--	--	--	--	--	--	--	--	--	--	--	--	--	--	--
Cluster-178855.4	2817	--	--	--	--	--	--	--	--	--	--	--	--	--	--	--	--	--	--	PF01176	Translation initiation factor 1A / IF-1	GO:0006413//GO:0006446	translational initiation//regulation of translational initiation	GO:0003723//GO:0003743	RNA binding//translation initiation factor activity	GO:0005840	ribosome	--	--
Cluster-284839.1	616	--	--	--	--	--	--	--	--	--	--	--	--	--	--	Q8VHX6	156	1.4e-09	Filamin-C OS=Mus musculus GN=Flnc PE=1 SV=3	PF05506	Domain of unknown function (DUF756)	GO:0009395//GO:0016042	phospholipid catabolic process//lipid catabolic process	GO:0004629	phospholipase C activity	--	--	--	--
Cluster-342212.149528	2232	551671724	XP_005838619.1	759	4.2e-78	hypothetical protein GUITHDRAFT_134530 [Guillardia theta CCMP2712]>gi|428182779|gb|EKX51639.1| hypothetical protein GUITHDRAFT_134530 [Guillardia theta CCMP2712]	964126946	XM_014907380.1	63	1.10688e-21	Drosophila ananassae uncharacterized protein, transcript variant B (Dana\GF11765), mRNA	--	--	--	--	Q9BR76	1267	7.3e-138	Coronin-1B OS=Homo sapiens GN=CORO1B PE=1 SV=1	PF00400//PF01783	WD domain, G-beta repeat//Ribosomal L32p protein family	GO:0006412//GO:0042254	translation//ribosome biogenesis	GO:0005515//GO:0003735	protein binding//structural constituent of ribosome	GO:0005840//GO:0015934	ribosome//large ribosomal subunit	KOG0303	Actin-binding protein Coronin, contains WD40 repeats
Cluster-342212.25162	714	255081022	XP_002504077.1	395	2.1e-36	predicted protein [Micromonas sp. RCC299]>gi|226519344|gb|ACO65335.1| predicted protein [Micromonas sp. RCC299]	--	--	--	--	--	K09571	FKBP4_5	FK506-binding protein 4/5	http://www.genome.jp/dbget-bin/www_bget?ko:K09571	O94746	476	1.2e-46	FK506-binding protein 1 OS=Cryptococcus neoformans var. grubii serotype A (strain H99 / ATCC 208821 / CBS 10515 / FGSC 9487) GN=FRR1 PE=3 SV=1	PF00254	FKBP-type peptidyl-prolyl cis-trans isomerase	GO:0006457//GO:0044267	protein folding//cellular protein metabolic process	GO:0016853	isomerase activity	--	--	KOG0544	FKBP-type peptidyl-prolyl cis-trans isomerase
Cluster-342212.89725	1011	299116096	CBN74512.1	788	8.1e-82	conserved unknown protein [Ectocarpus siliculosus]	116641039	CT836782.1	352	0	Oryza sativa (indica cultivar-group) cDNA clone:OSIGCRA128C05, full insert sequence	K02737	PSMB5	20S proteasome subunit beta 5	http://www.genome.jp/dbget-bin/www_bget?ko:K02737	P28075	802	2.7e-84	Proteasome subunit beta type-5 OS=Rattus norvegicus GN=Psmb5 PE=1 SV=3	PF00227	Proteasome subunit	GO:0051603	proteolysis involved in cellular protein catabolic process	GO:0004298	threonine-type endopeptidase activity	GO:0005839	proteasome core complex	KOG0175	20S proteasome, regulatory subunit beta type PSMB5/PSMB8/PRE2
Cluster-342212.95064	1126	--	--	--	--	--	--	--	--	--	--	--	--	--	--	--	--	--	--	--	--	--	--	--	--	--	--	--	--
Cluster-296901.2	1502	--	--	--	--	--	595778811	XM_007267887.1	36	7.54948e-07	Fomitiporia mediterranea MF3/22 hypothetical protein (FOMMEDRAFT_141532), mRNA	--	--	--	--	Q1DKX4	263	1.3e-21	Chitin synthase export chaperone OS=Coccidioides immitis (strain RS) GN=CHS7 PE=3 SV=1	--	--	--	--	--	--	--	--	--	--
Cluster-342212.118120	664	676379391	XP_009032974.1	161	2.7e-09	hypothetical protein AURANDRAFT_61079 [Aureococcus anophagefferens]>gi|323455985|gb|EGB11852.1| hypothetical protein AURANDRAFT_61079 [Aureococcus anophagefferens]	--	--	--	--	--	--	--	--	--	Q3E8Z8	129	2e-06	Putative pectinesterase/pectinesterase inhibitor 28 OS=Arabidopsis thaliana GN=PME28 PE=2 SV=1	--	--	--	--	--	--	--	--	--	--
Cluster-342212.232138	2727	--	--	--	--	--	--	--	--	--	--	--	--	--	--	--	--	--	--	--	--	--	--	--	--	--	--	--	--
Cluster-342212.104144	553	168011951	XP_001758666.1	256	2.2e-20	predicted protein [Physcomitrella patens]>gi|162690276|gb|EDQ76644.1| predicted protein [Physcomitrella patens]	--	--	--	--	--	--	--	--	--	Q4PF30	329	1.1e-29	Translationally-controlled tumor protein homolog OS=Ustilago maydis (strain 521 / FGSC 9021) GN=UMAG_12131 PE=3 SV=2	--	--	--	--	--	--	--	--	KOG1727	Microtubule-binding protein (translationally controlled tumor protein)
Cluster-342212.232132	4207	747088334	XP_011091752.1	844	1.1e-87	PREDICTED: uncharacterized protein LOC105172113 [Sesamum indicum]	--	--	--	--	--	--	--	--	--	O15050	548	3.3e-54	TPR and ankyrin repeat-containing protein 1 OS=Homo sapiens GN=TRANK1 PE=2 SV=4	PF13361//PF00637//PF00580	UvrD-like helicase C-terminal domain//Region in Clathrin and VPS//UvrD/REP helicase N-terminal domain	GO:0006886//GO:0016192	intracellular protein transport//vesicle-mediated transport	GO:0016787//GO:0005524	hydrolase activity//ATP binding	--	--	--	--
Cluster-342212.113143	1353	855309586	XP_012896902.1	486	1.1e-46	uncharacterized protein [Blastocystis hominis]>gi|300122281|emb|CBK22854.2| unnamed protein product [Blastocystis hominis]	--	--	--	--	--	K04368	MAP2K1, MEK1	mitogen-activated protein kinase kinase 1	http://www.genome.jp/dbget-bin/www_bget?ko:K04368	Q9Y884	673	3.3e-69	MAP kinase kinase skh1/pek1 OS=Schizosaccharomyces pombe (strain 972 / ATCC 24843) GN=skh1 PE=3 SV=1	PF07714//PF00069//PF06293	Protein tyrosine kinase//Protein kinase domain//Lipopolysaccharide kinase (Kdo/WaaP) family	GO:0006468	protein phosphorylation	GO:0004672//GO:0016773//GO:0005524	protein kinase activity//phosphotransferase activity, alcohol group as acceptor//ATP binding	GO:0016020	membrane	KOG0581	Mitogen-activated protein kinase kinase (MAP2K)
Cluster-147764.1	528	675187767	XP_008902768.1	518	8.7e-51	GTP-binding nuclear protein ran-1 [Phytophthora parasitica INRA-310]>gi|695445585|ref|XP_009534266.1| GTP-binding protein [Phytophthora sojae]>gi|348669583|gb|EGZ09405.1| GTP-binding protein [Phytophthora sojae]>gi|566028359|gb|ETI51270.1| GTP-binding nuclear protein ran-1 [Phytophthora parasitica P1569]>gi|567965696|gb|ETK91166.1| GTP-binding nuclear protein ran-1 [Phytophthora parasitica]>gi|56…	156057584	XM_001594666.1	122	3.96472e-55	Sclerotinia sclerotiorum 1980 GTP-binding nuclear protein GSP1/Ran (SS1G_04524) partial mRNA	K07936	RAN	GTP-binding nuclear protein Ran	http://www.genome.jp/dbget-bin/www_bget?ko:K07936	P38542	499	2e-49	GTP-binding nuclear protein Ran OS=Brugia malayi GN=Bm1_44725 PE=2 SV=2	PF00071//PF02874//PF09138//PF08477	Ras family//ATP synthase alpha/beta family, beta-barrel domain//Urm1 (Ubiquitin related modifier)//Ras of Complex, Roc, domain of DAPkinase	GO:0006184//GO:0006886//GO:0007264//GO:0015992//GO:0034227//GO:0046034//GO:0006913	obsolete GTP catabolic process//intracellular protein transport//small GTPase mediated signal transduction//proton transport//tRNA thio-modification//ATP metabolic process//nucleocytoplasmic transport	GO:0005525//GO:0003924	GTP binding//GTPase activity	GO:0005737//GO:0005622	cytoplasm//intracellular	KOG0096	GTPase Ran/TC4/GSP1 (nuclear protein transport pathway), small G protein superfamily
Cluster-342212.140672	1017	695006746	XP_009389889.1	681	2.1e-69	PREDICTED: 60S acidic ribosomal protein P0 [Musa acuminata subsp. malaccensis]	--	--	--	--	--	K02941	RP-LP0, RPLP0	large subunit ribosomal protein LP0	http://www.genome.jp/dbget-bin/www_bget?ko:K02941	P41095	670	5.6e-69	60S acidic ribosomal protein P0 OS=Oryza sativa subsp. japonica GN=Os08g0130500 PE=1 SV=3	PF00466	Ribosomal protein L10	GO:0042254	ribosome biogenesis	--	--	GO:0005622	intracellular	KOG0815	60S acidic ribosomal protein P0
Cluster-342212.140561	2132	--	--	--	--	--	--	--	--	--	--	--	--	--	--	--	--	--	--	PF11593	Mediator complex subunit 3 fungal	GO:0006357	regulation of transcription from RNA polymerase II promoter	GO:0001104	RNA polymerase II transcription cofactor activity	GO:0016592	mediator complex	--	--
Cluster-349632.3	1084	--	--	--	--	--	--	--	--	--	--	--	--	--	--	--	--	--	--	PF05309	TraE protein	GO:0000746	conjugation	--	--	--	--	--	--
Cluster-342212.178268	586	--	--	--	--	--	--	--	--	--	--	--	--	--	--	--	--	--	--	--	--	--	--	--	--	--	--	--	--
Cluster-342212.159004	698	--	--	--	--	--	--	--	--	--	--	--	--	--	--	P51638	258	2.3e-21	Caveolin-3 OS=Rattus norvegicus GN=Cav3 PE=1 SV=1	PF01146	Caveolin	GO:0070836	caveola assembly	--	--	--	--	--	--
Cluster-342212.222069	2089	695438247	XP_009532416.1	169	1e-09	pepsin-like aspartic protease A1 [Phytophthora sojae]>gi|348672263|gb|EGZ12083.1| pepsin-like aspartic protease A1 [Phytophthora sojae]	--	--	--	--	--	--	--	--	--	Q4WNV0	213	1.1e-15	Aspartic-type endopeptidase ctsD OS=Neosartorya fumigata (strain ATCC MYA-4609 / Af293 / CBS 101355 / FGSC A1100) GN=ctsD PE=1 SV=1	PF00026//PF04995//PF02480	Eukaryotic aspartyl protease//Heme exporter protein D (CcmD)//Alphaherpesvirus glycoprotein E	GO:0017004//GO:0006508//GO:0015886	cytochrome complex assembly//proteolysis//heme transport	GO:0004190	aspartic-type endopeptidase activity	GO:0016021//GO:0016020	integral component of membrane//membrane	KOG1339	Aspartyl protease
Cluster-342212.53268	761	--	--	--	--	--	--	--	--	--	--	--	--	--	--	--	--	--	--	--	--	--	--	--	--	--	--	--	--
Cluster-344939.0	1879	675179697	XP_008898733.1	554	2.1e-54	hypothetical protein PPTG_06546 [Phytophthora parasitica INRA-310]>gi|568101716|gb|ETN16402.1| hypothetical protein PPTG_06546 [Phytophthora parasitica INRA-310]	--	--	--	--	--	--	--	--	--	Q8MZS4	1330	3.1e-145	Physarolisin OS=Physarum polycephalum PE=1 SV=1	PF09286//PF00082	Pro-kumamolisin, activation domain//Subtilase family	GO:0006508	proteolysis	GO:0008236//GO:0004252	serine-type peptidase activity//serine-type endopeptidase activity	--	--	--	--
Cluster-280344.1	2000	695380371	XP_009516790.1	577	4.7e-57	hypothetical protein PHYSODRAFT_471041 [Phytophthora sojae]>gi|348689701|gb|EGZ29515.1| hypothetical protein PHYSODRAFT_471041 [Phytophthora sojae]	--	--	--	--	--	--	--	--	--	Q3L245	949	4.9e-101	Pyranose dehydrogenase 1 OS=Leucoagaricus meleagris GN=pdh1 PE=1 SV=1	PF01266//PF07992//PF00732//PF02254//PF05834//PF05199	FAD dependent oxidoreductase//Pyridine nucleotide-disulphide oxidoreductase//GMC oxidoreductase//TrkA-N domain//Lycopene cyclase protein//GMC oxidoreductase	GO:0016117//GO:0006813//GO:0055114	carotenoid biosynthetic process//potassium ion transport//oxidation-reduction process	GO:0050660//GO:0016705//GO:0016614//GO:0016491	flavin adenine dinucleotide binding//oxidoreductase activity, acting on paired donors, with incorporation or reduction of molecular oxygen//oxidoreductase activity, acting on CH-OH group of donors//oxidoreductase activity	--	--	--	--
Cluster-342212.93571	550	695369778	XP_009514141.1	405	1.1e-37	hypothetical protein PHYSODRAFT_320742 [Phytophthora sojae]>gi|348687052|gb|EGZ26866.1| hypothetical protein PHYSODRAFT_320742 [Phytophthora sojae]	--	--	--	--	--	K02889	RP-L21e, RPL21	large subunit ribosomal protein L21e	http://www.genome.jp/dbget-bin/www_bget?ko:K02889	Q54X53	393	4e-37	60S ribosomal protein L21 OS=Dictyostelium discoideum GN=rpl21 PE=3 SV=1	PF01157	Ribosomal protein L21e	GO:0042254//GO:0006412	ribosome biogenesis//translation	GO:0003735	structural constituent of ribosome	GO:0005840//GO:0005622	ribosome//intracellular	KOG1732	60S ribosomal protein L21
Cluster-342212.87581	541	303285238	XP_003061909.1	264	2.5e-21	cold-shock DNA binding protein [Micromonas pusilla CCMP1545]>gi|226456320|gb|EEH53621.1| cold-shock DNA binding protein [Micromonas pusilla CCMP1545]	--	--	--	--	--	K09250	CNBP	cellular nucleic acid-binding protein	http://www.genome.jp/dbget-bin/www_bget?ko:K09250	P27484	254	5.1e-21	Glycine-rich protein 2 OS=Nicotiana sylvestris GN=GRP-2 PE=2 SV=1	PF00313//PF00575	'Cold-shock' DNA-binding domain//S1 RNA binding domain	GO:0006355	regulation of transcription, DNA-templated	GO:0003676//GO:0003677	nucleic acid binding//DNA binding	--	--	KOG3070	Predicted RNA-binding protein containing PIN domain and invovled in translation or RNA processing
Cluster-342212.44640	2384	--	--	--	--	--	--	--	--	--	--	--	--	--	--	--	--	--	--	PF04612//PF01779	Type II secretion system (T2SS), protein M//Ribosomal L29e protein family	GO:0042254//GO:0006858//GO:0006412	ribosome biogenesis//extracellular transport//translation	GO:0003735	structural constituent of ribosome	GO:0005622//GO:0005840	intracellular//ribosome	--	--
Cluster-342212.190675	978	--	--	--	--	--	32994286	AK109077.1	917	0	Oryza sativa Japonica Group cDNA clone:002-154-G09, full insert sequence	--	--	--	--	Q00649	128	3.8e-06	Heat shock protein beta-1 OS=Gallus gallus GN=HSPB1 PE=2 SV=1	--	--	--	--	--	--	--	--	KOG3591	Alpha crystallins
Cluster-342212.91446	547	545710707	XP_005707661.1	490	1.6e-47	40S ribosomal protein S18 [Galdieria sulphuraria]>gi|452824136|gb|EME31141.1| 40S ribosomal protein S18 [Galdieria sulphuraria]	260829982	XM_002609895.1	62	9.29863e-22	Branchiostoma floridae hypothetical protein, mRNA	K02964	RP-S18e, RPS18	small subunit ribosomal protein S18e	http://www.genome.jp/dbget-bin/www_bget?ko:K02964	Q8ISP0	481	2.5e-47	40S ribosomal protein S18 OS=Branchiostoma belcheri GN=RPS18 PE=2 SV=1	PF02673//PF00416	Bacitracin resistance protein BacA//Ribosomal protein S13/S18	GO:0006412//GO:0016311//GO:0042254//GO:0009252	translation//dephosphorylation//ribosome biogenesis//peptidoglycan biosynthetic process	GO:0050380//GO:0003735//GO:0003723	undecaprenyl-diphosphatase activity//structural constituent of ribosome//RNA binding	GO:0005840//GO:0005622//GO:0016020	ribosome//intracellular//membrane	KOG3311	Ribosomal protein S18
Cluster-207319.0	3220	545359430	XP_005645191.1	312	4.1e-26	CHR family transporter: chromate ion [Coccomyxa subellipsoidea C-169]>gi|384247160|gb|EIE20647.1| CHR family transporter: chromate ion [Coccomyxa subellipsoidea C-169]	573979925	XM_006667845.1	60	7.46102e-20	Cordyceps militaris CM01 chromate ion transporter (CCM_02693), partial mRNA	K07240	chrA	chromate transporter	http://www.genome.jp/dbget-bin/www_bget?ko:K07240	--	--	--	--	PF02417//PF01618	Chromate transporter//MotA/TolQ/ExbB proton channel family	GO:0015703//GO:0006810//GO:0015031	chromate transport//transport//protein transport	GO:0015109//GO:0008565	chromate transmembrane transporter activity//protein transporter activity	GO:0016020	membrane	--	--
Cluster-342212.50638	2286	--	--	--	--	--	--	--	--	--	--	--	--	--	--	--	--	--	--	PF01544	CorA-like Mg2+ transporter protein	GO:0030001//GO:0055085	metal ion transport//transmembrane transport	GO:0046873	metal ion transmembrane transporter activity	GO:0016020	membrane	--	--
Cluster-342212.232767	663	27311795	AAO00863.1	490	1.9e-47	Unknown protein [Arabidopsis thaliana]	734650526	XM_010756295.1	145	8.27002e-68	PREDICTED: Larimichthys crocea histone H2A (LOC104939743), mRNA	K11251	H2A	histone H2A	http://www.genome.jp/dbget-bin/www_bget?ko:K11251	Q07135	485	1e-47	Histone H2A, orphon OS=Chironomus thummi thummi PE=3 SV=2	PF00125	Core histone H2A/H2B/H3/H4	--	--	GO:0003677	DNA binding	--	--	--	--
Cluster-342212.31552	3985	--	--	--	--	--	--	--	--	--	--	--	--	--	--	Q5A220	170	2.1e-10	Repressor of filamentous growth 1 OS=Candida albicans (strain SC5314 / ATCC MYA-2876) GN=RFG1 PE=2 SV=3	PF04732	Intermediate filament head (DNA binding) region	--	--	--	--	GO:0005882	intermediate filament	KOG0527	HMG-box transcription factor
Cluster-342212.117431	769	--	--	--	--	--	--	--	--	--	--	--	--	--	--	--	--	--	--	PF16049//PF00137//PF04888//PF00606	Frog antimicrobial peptide//ATP synthase subunit C//Secretion system effector C (SseC) like family//Herpesvirus Glycoprotein B	GO:0015992//GO:0009405//GO:0006952//GO:0015991	proton transport//pathogenesis//defense response//ATP hydrolysis coupled proton transport	GO:0015078	hydrogen ion transmembrane transporter activity	GO:0005576//GO:0033177//GO:0016020	extracellular region//proton-transporting two-sector ATPase complex, proton-transporting domain//membrane	--	--
Cluster-342212.81993	2231	673027750	XP_008867836.1	206	5.5e-14	hypothetical protein H310_05011 [Aphanomyces invadans]>gi|574476609|gb|ETW03607.1| hypothetical protein H310_05011 [Aphanomyces invadans]	--	--	--	--	--	--	--	--	--	Q17RP2	147	5.4e-08	Tigger transposable element-derived protein 6 OS=Homo sapiens GN=TIGD6 PE=2 SV=2	PF13545//PF00356//PF01381//PF01047//PF04545//PF04218	Crp-like helix-turn-helix domain//Bacterial regulatory proteins, lacI family//Helix-turn-helix//MarR family//Sigma-70, region 4//CENP-B N-terminal DNA-binding domain	GO:0006355//GO:0006352	regulation of transcription, DNA-templated//DNA-templated transcription, initiation	GO:0016987//GO:0003700//GO:0043565//GO:0003677	sigma factor activity//transcription factor activity, sequence-specific DNA binding//sequence-specific DNA binding//DNA binding	GO:0005667	transcription factor complex	--	--
Cluster-323859.0	1528	673033812	XP_008870867.1	887	4.1e-93	hypothetical protein H310_07281 [Aphanomyces invadans]>gi|574473729|gb|ETW00732.1| hypothetical protein H310_07281 [Aphanomyces invadans]	694542739	XM_009499141.1	56	5.85609e-18	Fonticula alba hypothetical protein partial mRNA	K18643	KATNB1	katanin p80 WD40 repeat-containing subunit B1	http://www.genome.jp/dbget-bin/www_bget?ko:K18643	P27133	1108	1.4e-119	Coronin-A OS=Dictyostelium discoideum GN=corA PE=1 SV=2	PF04517//PF00400	Microvirus lysis protein (E), C terminus//WD domain, G-beta repeat	GO:0019054	modulation by virus of host process	GO:0004857//GO:0005515	enzyme inhibitor activity//protein binding	--	--	KOG0303	Actin-binding protein Coronin, contains WD40 repeats
Cluster-351371.0	4270	--	--	--	--	--	--	--	--	--	--	--	--	--	--	--	--	--	--	PF00646//PF01700//PF15966//PF12937//PF08658	F-box domain//Orbivirus VP3 (T2) protein//F-box//F-box-like//Rad54 N terminal	--	--	GO:0005515//GO:0016817//GO:0005198	protein binding//hydrolase activity, acting on acid anhydrides//structural molecule activity	--	--	--	--
Cluster-342212.161341	1218	--	--	--	--	--	695540607	XM_009544763.1	34	7.87527e-06	Heterobasidion irregulare TC 32-1 hypothetical protein mRNA	--	--	--	--	P0DN32	174	2.2e-11	Probable GPI-anchored cupredoxin ARB_05732-1 OS=Arthroderma benhamiae (strain ATCC MYA-4681 / CBS 112371) GN=ARB_05732-1 PE=1 SV=1	PF00127//PF02298	Copper binding proteins, plastocyanin/azurin family//Plastocyanin-like domain	GO:0006118	obsolete electron transport	GO:0009055//GO:0005507	electron carrier activity//copper ion binding	--	--	--	--
Cluster-283981.0	613	--	--	--	--	--	--	--	--	--	--	--	--	--	--	Q01359	356	8.7e-33	Cytochrome c oxidase subunit 6, mitochondrial OS=Neurospora crassa (strain ATCC 24698 / 74-OR23-1A / CBS 708.71 / DSM 1257 / FGSC 987) GN=cox-6 PE=3 SV=2	PF02284	Cytochrome c oxidase subunit Va	GO:0015992//GO:0006123	proton transport//mitochondrial electron transport, cytochrome c to oxygen	GO:0004129	cytochrome-c oxidase activity	GO:0005743//GO:0045277	mitochondrial inner membrane//respiratory chain complex IV	KOG4077	Cytochrome c oxidase, subunit Va/COX6
Cluster-154681.0	1116	--	--	--	--	--	--	--	--	--	--	--	--	--	--	--	--	--	--	PF04136//PF00015	Sec34-like family//Methyl-accepting chemotaxis protein (MCP) signalling domain	GO:0007165//GO:0006886	signal transduction//intracellular protein transport	GO:0004871	signal transducer activity	GO:0016020//GO:0005801	membrane//cis-Golgi network	--	--
Cluster-342212.119651	1733	--	--	--	--	--	--	--	--	--	--	--	--	--	--	--	--	--	--	PF06936//PF09194	Selenoprotein S (SelS)//Restriction endonuclease BsobI	GO:0006308//GO:0009307//GO:0006886	DNA catabolic process//DNA restriction-modification system//intracellular protein transport	GO:0003677//GO:0009036	DNA binding//Type II site-specific deoxyribonuclease activity	GO:0030176//GO:0009359	integral component of endoplasmic reticulum membrane//Type II site-specific deoxyribonuclease complex	--	--
Cluster-342212.82997	4151	--	--	--	--	--	--	--	--	--	--	--	--	--	--	--	--	--	--	--	--	--	--	--	--	--	--	--	--
Cluster-342212.137934	1173	--	--	--	--	--	--	--	--	--	--	--	--	--	--	--	--	--	--	--	--	--	--	--	--	--	--	--	--
Cluster-342212.26769	3030	--	--	--	--	--	--	--	--	--	--	--	--	--	--	A0A0D1E9B9	561	7.3e-56	Spore development regulator umv1 OS=Ustilago maydis (strain 521 / FGSC 9021) GN=umv1 PE=3 SV=1	PF05699//PF02402	hAT family C-terminal dimerisation region//Lysis protein	GO:0009405//GO:0019835	pathogenesis//cytolysis	GO:0046983	protein dimerization activity	GO:0019867	outer membrane	--	--
Cluster-342212.234512	7959	673052435	XP_008880178.1	373	8.5e-33	hypothetical protein H310_14158 [Aphanomyces invadans]>gi|574464096|gb|ETV91147.1| hypothetical protein H310_14158 [Aphanomyces invadans]	913319839	XM_013335554.1	46	1.12482e-11	PREDICTED: Amyelois transitella dystrophin, isoforms A/C/F/G/H-like (LOC106135297), mRNA	--	--	--	--	Q00963	3372	0	Spectrin beta chain OS=Drosophila melanogaster GN=beta-Spec PE=1 SV=2	PF00307//PF05206//PF00435	Calponin homology (CH) domain//Methyltransferase TRM13//Spectrin repeat	GO:0008033	tRNA processing	GO:0008168//GO:0005515	methyltransferase activity//protein binding	--	--	KOG0040	Ca2+-binding actin-bundling protein (spectrin), alpha chain (EF-Hand protein superfamily)
Cluster-342212.27227	992	--	--	--	--	--	--	--	--	--	--	--	--	--	--	--	--	--	--	PF05454//PF02480	Dystroglycan (Dystrophin-associated glycoprotein 1)//Alphaherpesvirus glycoprotein E	GO:0007016	cytoskeletal anchoring at plasma membrane	--	--	GO:0016020//GO:0016010	membrane//dystrophin-associated glycoprotein complex	--	--
Cluster-342212.3854	1688	612395370	XP_007513205.1	364	2e-32	predicted protein [Bathycoccus prasinos]>gi|412993230|emb|CCO16763.1| predicted protein [Bathycoccus prasinos]	299752319	XM_001830795.2	138	1.6915e-63	Coprinopsis cinerea okayama7#130 SeqLit autophagocytosis associated domain-containing protein, mRNA	K08343	ATG3	ubiquitin-like-conjugating enzyme ATG3	http://www.genome.jp/dbget-bin/www_bget?ko:K08343	P0CM35	478	1.7e-46	Autophagy-related protein 3 OS=Cryptococcus neoformans var. neoformans serotype D (strain B-3501A) GN=ATG3 PE=3 SV=1	PF08655	DASH complex subunit Ask1	GO:0008608	attachment of spindle microtubules to kinetochore	--	--	GO:0042729//GO:0072686	DASH complex//mitotic spindle	KOG2981	Protein involved in autophagocytosis during starvation
Cluster-342212.23003	1318	658004717	XP_008337490.1	424	1.7e-39	PREDICTED: 40S ribosomal protein S8 [Malus domestica]	--	--	--	--	--	K02995	RP-S8e, RPS8	small subunit ribosomal protein S8e	http://www.genome.jp/dbget-bin/www_bget?ko:K02995	O81361	414	3.5e-39	40S ribosomal protein S8 OS=Prunus armeniaca GN=RPS8 PE=2 SV=1	--	--	--	--	--	--	--	--	KOG3283	40S ribosomal protein S8
Cluster-268575.0	4168	743756818	XP_010918871.1	1361	1.2e-147	PREDICTED: protein VACUOLELESS1 [Elaeis guineensis]	--	--	--	--	--	--	--	--	--	Q55C58	1237	4.1e-134	Vacuolar protein sorting-associated protein 16 homolog OS=Dictyostelium discoideum GN=vps16 PE=3 SV=2	PF04841//PF00816//PF04840	Vps16, N-terminal region//H-NS histone family//Vps16, C-terminal region	GO:0006355//GO:0006886	regulation of transcription, DNA-templated//intracellular protein transport	GO:0003677	DNA binding	GO:0005737//GO:0005622	cytoplasm//intracellular	KOG2280	Vacuolar assembly/sorting protein VPS16
Cluster-209966.1	1314	--	--	--	--	--	--	--	--	--	--	--	--	--	--	--	--	--	--	PF05241//PF06220	Emopamil binding protein//U1 zinc finger	GO:0006694//GO:0016125	steroid biosynthetic process//sterol metabolic process	GO:0008270//GO:0047750	zinc ion binding//cholestenol delta-isomerase activity	GO:0016021	integral component of membrane	--	--
Cluster-342212.49452	525	302830135	XP_002946634.1	501	8e-49	component of cytosolic 80S ribosome and 40S small subunit [Volvox carteri f. nagariensis]>gi|300268380|gb|EFJ52561.1| component of cytosolic 80S ribosome and 40S small subunit [Volvox carteri f. nagariensis]	116641706	CT837045.1	226	6.05739e-113	Oryza sativa (indica cultivar-group) cDNA clone:OSIGCRA116I22, full insert sequence	K02989	RP-S5e, RPS5	small subunit ribosomal protein S5e	http://www.genome.jp/dbget-bin/www_bget?ko:K02989	Q5E988	547	5.3e-55	40S ribosomal protein S5 OS=Bos taurus GN=RPS5 PE=2 SV=3	--	--	GO:0006412//GO:0042254	translation//ribosome biogenesis	GO:0003723//GO:0003735	RNA binding//structural constituent of ribosome	GO:0005840//GO:0015935	ribosome//small ribosomal subunit	KOG3291	Ribosomal protein S7
Cluster-342212.185272	985	--	--	--	--	--	299749043	XM_001838408.2	270	4.07304e-137	Coprinopsis cinerea okayama7#130 ### mannoprotein, mRNA	--	--	--	--	--	--	--	--	--	--	--	--	--	--	--	--	--	--
Cluster-342212.155723	4106	669158084	XP_008614604.1	351	1.6e-30	hypothetical protein SDRG_10394 [Saprolegnia diclina VS20]>gi|530733634|gb|EQC31876.1| hypothetical protein SDRG_10394 [Saprolegnia diclina VS20]	--	--	--	--	--	--	--	--	--	P11976	761	6.4e-79	Prestalk protein OS=Dictyostelium discoideum GN=ecmB PE=2 SV=2	PF04120	Low affinity iron permease	GO:0055085	transmembrane transport	--	--	--	--	KOG1217	Fibrillins and related proteins containing Ca2+-binding EGF-like domains
Cluster-342212.152500	2404	--	--	--	--	--	--	--	--	--	--	--	--	--	--	--	--	--	--	PF00036//PF13499//PF13833//PF13405//PF13202	EF hand//EF-hand domain pair//EF-hand domain pair//EF-hand domain//EF hand	--	--	GO:0005509	calcium ion binding	--	--	--	--
Cluster-374758.1	2700	326501236	BAJ98849.1	709	3.2e-72	predicted protein [Hordeum vulgare subsp. vulgare]	299754929	XM_001828243.2	243	1.16472e-121	Coprinopsis cinerea okayama7#130 ### guanine nucleotide-binding protein alpha-2 subunit, mRNA	--	--	--	--	P87033	974	8.4e-104	Guanine nucleotide-binding protein alpha-2 subunit OS=Ustilago maydis (strain 521 / FGSC 9021) GN=GPA2 PE=3 SV=1	PF04670//PF08477//PF00025//PF00376//PF00503//PF01926	Gtr1/RagA G protein conserved region//Ras of Complex, Roc, domain of DAPkinase//ADP-ribosylation factor family//MerR family regulatory protein//G-protein alpha subunit//50S ribosome-binding GTPase	GO:0007264//GO:0007186//GO:0006355//GO:0007165	small GTPase mediated signal transduction//G-protein coupled receptor signaling pathway//regulation of transcription, DNA-templated//signal transduction	GO:0031683//GO:0003677//GO:0005525//GO:0019001//GO:0004871//GO:0003924	G-protein beta/gamma-subunit complex binding//DNA binding//GTP binding//guanyl nucleotide binding//signal transducer activity//GTPase activity	--	--	KOG0082	G-protein alpha subunit (small G protein superfamily)
Cluster-342212.193442	679	159483809	XP_001699953.1	280	4.4e-23	hypothetical protein CHLREDRAFT_141763 [Chlamydomonas reinhardtii]>gi|158281895|gb|EDP07649.1| predicted protein [Chlamydomonas reinhardtii]	--	--	--	--	--	K12668	OST2, DAD1	oligosaccharyltransferase complex subunit epsilon	http://www.genome.jp/dbget-bin/www_bget?ko:K12668	P46967	308	3.5e-27	Dolichyl-diphosphooligosaccharide--protein glycosyltransferase subunit dad1 OS=Xenopus laevis GN=dad1 PE=3 SV=1	PF02109	DAD family	GO:0018279	protein N-linked glycosylation via asparagine	GO:0004579	dolichyl-diphosphooligosaccharide-protein glycotransferase activity	GO:0008250//GO:0016021	oligosaccharyltransferase complex//integral component of membrane	KOG1746	Defender against cell death protein/oligosaccharyltransferase, epsilon subunit
Cluster-182492.0	3683	673025946	XP_008866934.1	1063	3.8e-113	5-aminolevulinic acid synthase [Aphanomyces invadans]>gi|574476981|gb|ETW03978.1| 5-aminolevulinic acid synthase [Aphanomyces invadans]	597911095	XM_007302785.1	321	6.96082e-165	Stereum hirsutum FP-91666 SS1 5-aminolevulinate synthase (STEHIDRAFT_120398), mRNA	K00639	kbl, GCAT	glycine C-acetyltransferase	http://www.genome.jp/dbget-bin/www_bget?ko:K00639	Q92403	2134	3.5e-238	5-aminolevulinate synthase, mitochondrial OS=Agaricus bisporus GN=hem1 PE=2 SV=1	PF00155//PF01053	Aminotransferase class I and II//Cys/Met metabolism PLP-dependent enzyme	GO:0009058	biosynthetic process	GO:0030170	pyridoxal phosphate binding	--	--	KOG1360	5-aminolevulinate synthase
Cluster-345582.1	660	669145242	XP_008608183.1	246	3.8e-19	50S ribosomal protein L22e [Saprolegnia diclina VS20]>gi|530740349|gb|EQC38591.1| 50S ribosomal protein L22e [Saprolegnia diclina VS20]	--	--	--	--	--	K02891	RP-L22e, RPL22	large subunit ribosomal protein L22e	http://www.genome.jp/dbget-bin/www_bget?ko:K02891	Q54JE3	202	6.8e-15	60S ribosomal protein L22 1 OS=Dictyostelium discoideum GN=rpl22 PE=3 SV=1	PF01776//PF01775	Ribosomal L22e protein family//Ribosomal L18ae/LX protein domain	GO:0042254//GO:0006412	ribosome biogenesis//translation	GO:0003735	structural constituent of ribosome	GO:0005840//GO:0005622	ribosome//intracellular	KOG3434	60S ribosomal protein L22
Cluster-317279.1	1459	552831503	XP_005848150.1	485	1.6e-46	hypothetical protein CHLNCDRAFT_145497 [Chlorella variabilis]>gi|307107806|gb|EFN56048.1| hypothetical protein CHLNCDRAFT_145497 [Chlorella variabilis]	--	--	--	--	--	--	--	--	--	Q9LFN3	464	6.2e-45	Probable sugar phosphate/phosphate translocator At5g11230 OS=Arabidopsis thaliana GN=At5g11230 PE=2 SV=1	PF00892	EamA-like transporter family	--	--	--	--	GO:0016021//GO:0016020	integral component of membrane//membrane	KOG1441	Glucose-6-phosphate/phosphate and phosphoenolpyruvate/phosphate antiporter
Cluster-342212.136584	1095	--	--	--	--	--	--	--	--	--	--	--	--	--	--	--	--	--	--	PF05699//PF06403	hAT family C-terminal dimerisation region//Lamprin	--	--	GO:0046983//GO:0005198	protein dimerization activity//structural molecule activity	GO:0005578	proteinaceous extracellular matrix	--	--
Cluster-357558.0	416	--	--	--	--	--	--	--	--	--	--	--	--	--	--	--	--	--	--	PF00631//PF04977	GGL domain//Septum formation initiator	GO:0007186//GO:0007165//GO:0007049	G-protein coupled receptor signaling pathway//signal transduction//cell cycle	GO:0004871	signal transducer activity	GO:0005834	heterotrimeric G-protein complex	--	--
Cluster-342212.131823	794	218202219	EEC84646.1	164	1.5e-09	hypothetical protein OsI_31535 [Oryza sativa Indica Group]	--	--	--	--	--	--	--	--	--	--	--	--	--	--	--	--	--	--	--	--	--	--	--
Cluster-342212.99940	1223	255075543	XP_002501446.1	469	9.6e-45	ribosomal protein [Micromonas sp. RCC299]>gi|226516710|gb|ACO62704.1| ribosomal protein [Micromonas sp. RCC299]	669264089	XM_008643253.1	35	2.19887e-06	PREDICTED: Corvus brachyrhynchos ribosomal protein S11 (RPS11), mRNA	K02949	RP-S11e, RPS11	small subunit ribosomal protein S11e	http://www.genome.jp/dbget-bin/www_bget?ko:K02949	P16181	439	4.1e-42	40S ribosomal protein S11-1 OS=Arabidopsis thaliana GN=RPS11A PE=2 SV=1	PF00366	Ribosomal protein S17	GO:0042254//GO:0006412	ribosome biogenesis//translation	GO:0003735	structural constituent of ribosome	GO:0005840//GO:0005622	ribosome//intracellular	KOG1728	40S ribosomal protein S11
Cluster-342212.176602	1653	302796438	XP_002979981.1	734	2.4e-75	hypothetical protein SELMODRAFT_228671 [Selaginella moellendorffii]>gi|300152208|gb|EFJ18851.1| hypothetical protein SELMODRAFT_228671 [Selaginella moellendorffii]	--	--	--	--	--	K12666	OST1, RPN1	oligosaccharyltransferase complex subunit alpha (ribophorin I)	http://www.genome.jp/dbget-bin/www_bget?ko:K12666	Q91YQ5	994	2.5e-106	Dolichyl-diphosphooligosaccharide--protein glycosyltransferase subunit 1 OS=Mus musculus GN=Rpn1 PE=1 SV=1	PF04597	Ribophorin I	GO:0018279//GO:0006486	protein N-linked glycosylation via asparagine//protein glycosylation	GO:0004579	dolichyl-diphosphooligosaccharide-protein glycotransferase activity	GO:0008250//GO:0005783//GO:0016021	oligosaccharyltransferase complex//endoplasmic reticulum//integral component of membrane	KOG2291	Oligosaccharyltransferase, alpha subunit (ribophorin I)
Cluster-342212.101509	403	195651253	ACG45094.1	245	3e-19	60S ribosomal protein L34 [Zea mays]	--	--	--	--	--	K02915	RP-L34e, RPL34	large subunit ribosomal protein L34e	http://www.genome.jp/dbget-bin/www_bget?ko:K02915	P40590	233	1e-18	60S ribosomal protein L34 OS=Pisum sativum GN=RPL34 PE=2 SV=1	PF01199	Ribosomal protein L34e	GO:0042254//GO:0006412	ribosome biogenesis//translation	GO:0003735	structural constituent of ribosome	GO:0005622//GO:0005840	intracellular//ribosome	KOG1790	60s ribosomal protein L34
Cluster-342212.139824	576	--	--	--	--	--	--	--	--	--	--	--	--	--	--	--	--	--	--	--	--	--	--	--	--	--	--	--	--
Cluster-342212.128857	847	3046986	AAC99646.1	1336	2e-145	actin [Euglena gracilis]	671002439	XM_008693854.1	303	1.57482e-155	PREDICTED: Ursus maritimus actin, gamma 1 (ACTG1), mRNA	K10355	ACTF	actin, other eukaryote	http://www.genome.jp/dbget-bin/www_bget?ko:K10355	P83751	1240	3.8e-135	Actin, cytoplasmic 1 OS=Ctenopharyngodon idella GN=actb PE=3 SV=1	--	--	--	--	--	--	--	--	KOG0676	Actin and related proteins
Cluster-342212.107657	1124	--	--	--	--	--	--	--	--	--	--	--	--	--	--	--	--	--	--	PF09264	Vibrio cholerae sialidase, lectin insertion	--	--	GO:0033691	sialic acid binding	--	--	--	--
Cluster-342212.9054	843	661896414	CDO99603.1	587	1.4e-58	unnamed protein product [Coffea canephora]	--	--	--	--	--	--	--	--	--	Q54X16	531	6.1e-53	Glucose-induced degradation protein 8 homolog OS=Dictyostelium discoideum GN=DDB_G0279265 PE=3 SV=2	PF08513	LisH	--	--	GO:0005515	protein binding	--	--	KOG2659	LisH motif-containing protein
Cluster-325565.0	374	--	--	--	--	--	--	--	--	--	--	--	--	--	--	--	--	--	--	--	--	--	--	--	--	--	--	--	--
Cluster-236249.1	1137	168054541	XP_001779689.1	1005	6.3e-107	predicted protein [Physcomitrella patens]>gi|162668887|gb|EDQ55485.1| predicted protein [Physcomitrella patens]	695396493	XM_009523183.1	186	2.33953e-90	Phytophthora sojae hypothetical protein partial mRNA	K14563	NOP1, FBL	rRNA 2'-O-methyltransferase fibrillarin	http://www.genome.jp/dbget-bin/www_bget?ko:K14563	Q9W1V3	1034	3.9e-111	rRNA 2'-O-methyltransferase fibrillarin OS=Drosophila melanogaster GN=Fib PE=2 SV=1	PF01728//PF01135//PF08704//PF01189//PF01269	FtsJ-like methyltransferase//Protein-L-isoaspartate(D-aspartate) O-methyltransferase (PCMT)//tRNA methyltransferase complex GCD14 subunit//16S rRNA methyltransferase RsmF//Fibrillarin	GO:0006479//GO:0046500//GO:0032259//GO:0009451//GO:0008033//GO:0006364//GO:0006464//GO:0030488	protein methylation//S-adenosylmethionine metabolic process//methylation//RNA modification//tRNA processing//rRNA processing//cellular protein modification process//tRNA methylation	GO:0003723//GO:0004719//GO:0016429//GO:0008168	RNA binding//protein-L-isoaspartate (D-aspartate) O-methyltransferase activity//tRNA (adenine-N1-)-methyltransferase activity//methyltransferase activity	GO:0031515	tRNA (m1A) methyltransferase complex	KOG1596	Fibrillarin and related nucleolar RNA-binding proteins
Cluster-342212.137583	1542	552835046	XP_005848886.1	228	1.1e-16	hypothetical protein CHLNCDRAFT_144273 [Chlorella variabilis]>gi|307108544|gb|EFN56784.1| hypothetical protein CHLNCDRAFT_144273 [Chlorella variabilis]	--	--	--	--	--	--	--	--	--	--	--	--	--	--	--	--	--	--	--	--	--	--	--
Cluster-342212.198505	5209	551597180	XP_005780718.1	280	3.4e-22	hypothetical protein EMIHUDRAFT_442957 [Emiliania huxleyi CCMP1516]>gi|485633416|gb|EOD28289.1| hypothetical protein EMIHUDRAFT_442957 [Emiliania huxleyi CCMP1516]	598029024	XM_007343823.1	44	9.50427e-11	Auricularia subglabra TFB-10046 SS5 hypothetical protein mRNA	--	--	--	--	Q4WY82	1116	5.5e-120	Linoleate 10R-lipoxygenase OS=Neosartorya fumigata (strain ATCC MYA-4609 / Af293 / CBS 101355 / FGSC A1100) GN=ppoC PE=1 SV=2	PF00520	Ion transport protein	GO:0006811//GO:0055085	ion transport//transmembrane transport	GO:0005216	ion channel activity	GO:0016020	membrane	--	--
Cluster-199926.0	480	595876474	XP_007212215.1	299	1.9e-25	hypothetical protein PRUPE_ppa013114mg [Prunus persica]>gi|462408080|gb|EMJ13414.1| hypothetical protein PRUPE_ppa013114mg [Prunus persica]	1002457667	XM_015799421.1	64	6.24946e-23	Leptomonas pyrrhocoris putative 60S ribosomal protein L44 mRNA	K02929	RP-L44e, RPL44	large subunit ribosomal protein L44e	http://www.genome.jp/dbget-bin/www_bget?ko:K02929	P17843	320	1e-28	60S ribosomal protein L44 OS=Trypanosoma brucei brucei GN=RPL44 PE=3 SV=3	PF00935	Ribosomal protein L44	GO:0006412//GO:0042254	translation//ribosome biogenesis	GO:0003735	structural constituent of ribosome	GO:0005840//GO:0005622	ribosome//intracellular	KOG3464	60S ribosomal protein L44
Cluster-342212.181160	3120	695444868	XP_009534080.1	975	5.2e-103	hypothetical protein PHYSODRAFT_518839 [Phytophthora sojae]>gi|348671514|gb|EGZ11335.1| hypothetical protein PHYSODRAFT_518839 [Phytophthora sojae]	--	--	--	--	--	--	--	--	--	P98167	565	2.6e-56	SCO-spondin OS=Bos taurus GN=SSPO PE=2 SV=2	PF08493	Aflatoxin regulatory protein	GO:0006355//GO:0045122	regulation of transcription, DNA-templated//aflatoxin biosynthetic process	GO:0003677	DNA binding	GO:0005634	nucleus	KOG3611	Semaphorins
Cluster-342212.93540	924	--	--	--	--	--	--	--	--	--	--	--	--	--	--	--	--	--	--	--	--	--	--	--	--	--	--	--	--
Cluster-334903.0	1694	--	--	--	--	--	--	--	--	--	--	--	--	--	--	--	--	--	--	--	--	--	--	--	--	--	--	--	--
Cluster-342212.108970	4429	698807346	XP_009836702.1	291	1.5e-23	hypothetical protein H257_11459 [Aphanomyces astaci]>gi|574108258|gb|ETV73766.1| hypothetical protein H257_11459 [Aphanomyces astaci]	--	--	--	--	--	--	--	--	--	Q02645	1002	7.8e-107	Protein hu-li tai shao OS=Drosophila melanogaster GN=hts PE=1 SV=2	PF05399//PF07647//PF00536	Ectropic viral integration site 2A protein (EVI2A)//SAM domain (Sterile alpha motif)//SAM domain (Sterile alpha motif)	--	--	GO:0005515	protein binding	GO:0016021	integral component of membrane	KOG3699	Cytoskeletal protein Adducin
Cluster-342212.236398	2085	672133892	XP_008790583.1	1559	6.7e-171	PREDICTED: nucleolar GTP-binding protein 1-like [Phoenix dactylifera]>gi|672133894|ref|XP_008790584.1| PREDICTED: nucleolar GTP-binding protein 1-like [Phoenix dactylifera]	32994136	AK108927.1	1906	0	Oryza sativa Japonica Group cDNA clone:002-153-A02, full insert sequence	K06943	NOG1	nucleolar GTP-binding protein	http://www.genome.jp/dbget-bin/www_bget?ko:K06943	Q99ME9	2008	8.1e-224	Nucleolar GTP-binding protein 1 OS=Mus musculus GN=Gtpbp4 PE=1 SV=3	PF06858//PF04548//PF02421//PF03193//PF02382//PF08477//PF01926//PF00071	Nucleolar GTP-binding protein 1 (NOG1)//AIG1 family//Ferrous iron transport protein B//Protein of unknown function, DUF258//RTX N-terminal domain//Ras of Complex, Roc, domain of DAPkinase//50S ribosome-binding GTPase//Ras family	GO:0015684//GO:0009405//GO:0007264	ferrous iron transport//pathogenesis//small GTPase mediated signal transduction	GO:0015093//GO:0005509//GO:0003924//GO:0005525	ferrous iron transmembrane transporter activity//calcium ion binding//GTPase activity//GTP binding	GO:0016021//GO:0005576	integral component of membrane//extracellular region	KOG1490	GTP-binding protein CRFG/NOG1 (ODN superfamily)
Cluster-342212.25883	1557	--	--	--	--	--	299751651	XM_001830351.2	389	0	Coprinopsis cinerea okayama7#130 SeqLit hypothetical protein, mRNA	--	--	--	--	Q4P965	203	1.2e-14	Protein VTS1 OS=Ustilago maydis (strain 521 / FGSC 9021) GN=VTS1 PE=3 SV=1	--	--	--	--	--	--	--	--	--	--
Cluster-342212.90818	1594	--	--	--	--	--	--	--	--	--	--	--	--	--	--	--	--	--	--	PF05924	SAMP Motif	GO:0016055	Wnt signaling pathway	GO:0008013	beta-catenin binding	GO:0016342	catenin complex	--	--
Cluster-342212.95080	678	612393442	XP_007512241.1	448	1.5e-42	predicted protein [Bathycoccus prasinos]>gi|424513707|emb|CCO66329.1| predicted protein [Bathycoccus prasinos]	--	--	--	--	--	K02872	RP-L13Ae, RPL13A	large subunit ribosomal protein L13Ae	http://www.genome.jp/dbget-bin/www_bget?ko:K02872	P19253	431	1.9e-41	60S ribosomal protein L13a OS=Mus musculus GN=Rpl13a PE=1 SV=4	PF00572	Ribosomal protein L13	GO:0042254//GO:0006412	ribosome biogenesis//translation	GO:0003735	structural constituent of ribosome	GO:0005840	ribosome	KOG3204	60S ribosomal protein L13a
Cluster-149718.0	3007	719973760	XP_010243012.1	696	1.1e-70	PREDICTED: protein argonaute MEL1-like [Nelumbo nucifera]	--	--	--	--	--	--	--	--	--	Q8CJF9	659	3.1e-67	Protein argonaute-3 OS=Mus musculus GN=Ago3 PE=2 SV=2	PF02171//PF02170	Piwi domain//PAZ domain	--	--	GO:0003676//GO:0005515	nucleic acid binding//protein binding	--	--	KOG1041	Translation initiation factor 2C (eIF-2C) and related proteins
Cluster-139553.1	1804	695415283	XP_009526513.1	305	1.5e-25	hypothetical protein PHYSODRAFT_560104 [Phytophthora sojae]>gi|348677638|gb|EGZ17455.1| hypothetical protein PHYSODRAFT_560104 [Phytophthora sojae]	--	--	--	--	--	--	--	--	--	Q53552	490	7.4e-48	Salicylate hydroxylase OS=Pseudomonas putida GN=nahG PE=4 SV=1	PF01266//PF07992//PF01494//PF01043//PF08491	FAD dependent oxidoreductase//Pyridine nucleotide-disulphide oxidoreductase//FAD binding domain//SecA preprotein cross-linking domain//Squalene epoxidase	GO:0055114//GO:0017038//GO:0006694//GO:0016114	oxidation-reduction process//protein import//steroid biosynthetic process//terpenoid biosynthetic process	GO:0016491//GO:0071949//GO:0004506//GO:0050660	oxidoreductase activity//FAD binding//squalene monooxygenase activity//flavin adenine dinucleotide binding	GO:0016021//GO:0016020	integral component of membrane//membrane	--	--
Cluster-342212.29013	797	645244365	XP_008228397.1	136	2.6e-06	PREDICTED: polyadenylate-binding protein 4-like [Prunus mume]	--	--	--	--	--	--	--	--	--	--	--	--	--	PF08777//PF00076	RNA binding motif//RNA recognition motif. (a.k.a. RRM, RBD, or RNP domain)	--	--	GO:0003723//GO:0003676	RNA binding//nucleic acid binding	--	--	--	--
Cluster-342212.246963	2088	--	--	--	--	--	--	--	--	--	--	--	--	--	--	--	--	--	--	PF06816//PF03859//PF00120	NOTCH protein//CG-1 domain//Glutamine synthetase, catalytic domain	GO:0009252//GO:0030154//GO:0006807	peptidoglycan biosynthetic process//cell differentiation//nitrogen compound metabolic process	GO:0003677//GO:0004356	DNA binding//glutamate-ammonia ligase activity	GO:0016021//GO:0005634	integral component of membrane//nucleus	--	--
Cluster-342212.139966	286	255966066	ACU45318.1	411	1.2e-38	actin [Rhodomonas sp. CCMP768]	225710441	BT076643.1	138	2.59054e-64	Caligus rogercresseyi clone crog-evp-503-099 Actin, muscle putative mRNA, complete cds	K10355	ACTF	actin, other eukaryote	http://www.genome.jp/dbget-bin/www_bget?ko:K10355	P10981	433	4.8e-42	Actin-87E OS=Drosophila melanogaster GN=Act87E PE=1 SV=1	--	--	--	--	--	--	--	--	KOG0676	Actin and related proteins
Cluster-342212.48544	1221	--	--	--	--	--	--	--	--	--	--	--	--	--	--	O54161	177	9.9e-12	Extracellular exo-alpha-L-arabinofuranosidase OS=Streptomyces coelicolor (strain ATCC BAA-471 / A3(2) / M145) GN=abfB PE=1 SV=1	PF02891	MIZ/SP-RING zinc finger	--	--	GO:0008270	zinc ion binding	--	--	--	--
Cluster-342212.165552	3258	695437609	XP_009532258.1	804	3.7e-83	hypothetical protein PHYSODRAFT_250864 [Phytophthora sojae]>gi|348672105|gb|EGZ11925.1| hypothetical protein PHYSODRAFT_250864 [Phytophthora sojae]	636602792	XM_008034340.1	279	1.36937e-141	Trametes versicolor FP-101664 SS1 general substrate transporter mRNA	K06013	STE24	STE24 endopeptidase	http://www.genome.jp/dbget-bin/www_bget?ko:K06013	P18631	912	1.6e-96	Low-affinity glucose transporter OS=Kluyveromyces lactis (strain ATCC 8585 / CBS 2359 / DSM 70799 / NBRC 1267 / NRRL Y-1140 / WM37) GN=RAG1 PE=1 SV=1	PF01435//PF07690//PF03014//PF00083//PF05631	Peptidase family M48//Major Facilitator Superfamily//Structural protein 2//Sugar (and other) transporter//Sugar-tranasporters, 12 TM	GO:0006508//GO:0055085//GO:0015689	proteolysis//transmembrane transport//molybdate ion transport	GO:0015098//GO:0004222//GO:0022857//GO:0005198	molybdate ion transmembrane transporter activity//metalloendopeptidase activity//transmembrane transporter activity//structural molecule activity	GO:0016021	integral component of membrane	KOG2719	Metalloprotease
Cluster-309677.0	1075	325184995	CCA19486.1	1075	4.6e-115	60S ribosomal protein L3 putative [Albugo laibachii Nc14]	598015164	XM_007338173.1	96	2.36976e-40	Auricularia subglabra TFB-10046 SS5 60S ribosomal protein L3 mRNA	K02925	RP-L3e, RPL3	large subunit ribosomal protein L3e	http://www.genome.jp/dbget-bin/www_bget?ko:K02925	Q8NKF4	1050	5.1e-113	60S ribosomal protein L3 OS=Neosartorya fumigata (strain ATCC MYA-4609 / Af293 / CBS 101355 / FGSC A1100) GN=rpl3 PE=1 SV=2	PF00297	Ribosomal protein L3	GO:0042254//GO:0006412	ribosome biogenesis//translation	GO:0003735	structural constituent of ribosome	GO:0005840//GO:0005622	ribosome//intracellular	KOG0746	60S ribosomal protein L3 and related proteins
Cluster-342212.93558	637	--	--	--	--	--	--	--	--	--	--	--	--	--	--	--	--	--	--	PF02950	Conotoxin	GO:0006810//GO:0009405	transport//pathogenesis	GO:0008200	ion channel inhibitor activity	GO:0005576	extracellular region	--	--
Cluster-342212.175802	2500	242074456	XP_002447164.1	186	1.3e-11	hypothetical protein SORBIDRAFT_06g029650 [Sorghum bicolor]>gi|241938347|gb|EES11492.1| hypothetical protein SORBIDRAFT_06g029650 [Sorghum bicolor]	926617093	XM_013918243.1	40	7.57538e-09	PREDICTED: Limulus polyphemus Y-box factor homolog (LOC106458699), mRNA	K09250	CNBP	cellular nucleic acid-binding protein	http://www.genome.jp/dbget-bin/www_bget?ko:K09250	P41824	392	2.4e-36	Y-box factor homolog OS=Aplysia californica PE=2 SV=1	PF00313	'Cold-shock' DNA-binding domain	GO:0006355	regulation of transcription, DNA-templated	GO:0003676//GO:0003677	nucleic acid binding//DNA binding	GO:0044464	cell part	KOG3070	Predicted RNA-binding protein containing PIN domain and invovled in translation or RNA processing
Cluster-146623.0	2436	--	--	--	--	--	--	--	--	--	--	--	--	--	--	--	--	--	--	PF16326//PF04111//PF07716//PF00170	ABC transporter C-terminal domain//Autophagy protein Apg6//Basic region leucine zipper//bZIP transcription factor	GO:0006914//GO:0006355	autophagy//regulation of transcription, DNA-templated	GO:0003700//GO:0043565//GO:0003677	transcription factor activity, sequence-specific DNA binding//sequence-specific DNA binding//DNA binding	GO:0005667	transcription factor complex	--	--
Cluster-342212.113568	1431	325188317	CCA22856.1	430	3.8e-40	unknown protein putative [Albugo laibachii Nc14]	597940682	XM_007324623.1	200	4.88961e-98	Serpula lacrymans var. lacrymans S7.9 hypothetical protein (SERLADRAFT_480943), mRNA	--	--	--	--	Q9USM4	476	2.5e-46	U1 snRNP-associated protein usp106 OS=Schizosaccharomyces pombe (strain 972 / ATCC 24843) GN=usp106 PE=1 SV=1	PF03194	LUC7 N_terminus	GO:0006376	mRNA splice site selection	GO:0003729	mRNA binding	GO:0005685	U1 snRNP	KOG0796	Spliceosome subunit
Cluster-372525.1	400	--	--	--	--	--	--	--	--	--	--	--	--	--	--	--	--	--	--	--	--	--	--	--	--	--	--	--	--
Cluster-342212.28497	560	--	--	--	--	--	--	--	--	--	--	--	--	--	--	Q5RFH0	269	9.7e-23	ATP synthase subunit g, mitochondrial OS=Pongo abelii GN=ATP5L PE=3 SV=1	PF04718	Mitochondrial ATP synthase g subunit	GO:0015986//GO:0015992	ATP synthesis coupled proton transport//proton transport	GO:0015078	hydrogen ion transmembrane transporter activity	GO:0000276	mitochondrial proton-transporting ATP synthase complex, coupling factor F(o)	KOG4103	Mitochondrial F1F0-ATP synthase, subunit g/ATP20
Cluster-342212.159229	932	676381743	XP_009034150.1	685	6.6e-70	hypothetical protein AURANDRAFT_5527, partial [Aureococcus anophagefferens]>gi|323455169|gb|EGB11038.1| hypothetical protein AURANDRAFT_5527, partial [Aureococcus anophagefferens]	695375632	XM_009517294.1	81	4.46207e-32	Phytophthora sojae hypothetical protein partial mRNA	K02936	RP-L7Ae, RPL7A	large subunit ribosomal protein L7Ae	http://www.genome.jp/dbget-bin/www_bget?ko:K02936	P0DJ14	671	3.9e-69	60S ribosomal protein L7a OS=Tetrahymena thermophila GN=RPL7A PE=1 SV=1	PF04795	PAPA-1-like conserved region	--	--	--	--	GO:0031011	Ino80 complex	KOG3166	60S ribosomal protein L7A
Cluster-342212.164173	1851	3293267	AAC25693.1	1489	7.7e-163	paraflagellar rod protein PR40 [Euglena gracilis]	686645243	XM_009316792.1	688	0	Trypanosoma grayi putative paraflagellar rod protein 3 partial mRNA	--	--	--	--	P22225	2284	7.2e-256	69 kDa paraflagellar rod protein OS=Trypanosoma brucei brucei GN=PFRA PE=2 SV=1	PF02949//PF05149	7tm Odorant receptor//Paraflagellar rod protein	GO:0007187//GO:0007608	G-protein coupled receptor signaling pathway, coupled to cyclic nucleotide second messenger//sensory perception of smell	GO:0005516//GO:0005549//GO:0004984	calmodulin binding//odorant binding//olfactory receptor activity	GO:0031514//GO:0016020	motile cilium//membrane	--	--
Cluster-342212.2832	799	544215143	XP_005537717.1	448	1.7e-42	60S ribosomal protein L13 [Cyanidioschyzon merolae strain 10D]>gi|449018279|dbj|BAM81681.1| 60S ribosomal protein L13 [Cyanidioschyzon merolae strain 10D]	299755438	XM_001828609.2	289	8.9817e-148	Coprinopsis cinerea okayama7#130 60S ribosomal protein L13, partial mRNA	K02873	RP-L13e, RPL13	large subunit ribosomal protein L13e	http://www.genome.jp/dbget-bin/www_bget?ko:K02873	Q90Z10	452	8.4e-44	60S ribosomal protein L13 OS=Danio rerio GN=rpl13 PE=2 SV=3	PF01294	Ribosomal protein L13e	GO:0006412//GO:0042254	translation//ribosome biogenesis	GO:0003735	structural constituent of ribosome	GO:0005622//GO:0005840	intracellular//ribosome	KOG3295	60S Ribosomal protein L13
Cluster-342212.189324	1900	551666247	XP_005835885.1	1394	8.2e-152	hypothetical protein GUITHDRAFT_68545 [Guillardia theta CCMP2712]>gi|428180036|gb|EKX48905.1| hypothetical protein GUITHDRAFT_68545 [Guillardia theta CCMP2712]	158295964	XM_316539.2	346	4.50936e-179	Anopheles gambiae str. PEST AGAP006511-PA (AgaP_AGAP006511) mRNA, complete cds	K06067	HDAC1_2	histone deacetylase 1/2	http://www.genome.jp/dbget-bin/www_bget?ko:K06067	P56517	1681	6.1e-186	Histone deacetylase 1 OS=Gallus gallus GN=HDAC1 PE=2 SV=1	--	--	--	--	--	--	--	--	KOG1342	Histone deacetylase complex, catalytic component RPD3
Cluster-342212.232212	891	145353601	XP_001421096.1	1134	5.4e-122	Receptor of activated protein kinase C 1A, component of 40S small ribosomal subunit [Ostreococcus lucimarinus CCE9901]>gi|145357301|ref|XP_001422858.1| Receptor of activated protein kinase C 1B, component of 40S small ribosomal subunit [Ostreococcus lucimarinus CCE9901]>gi|144581332|gb|ABO99389.1| Receptor of activated protein kinase C 1A, component of 40S small ribosomal subunit [Ostreococcus lu…	--	--	--	--	--	K14753	RACK1	guanine nucleotide-binding protein subunit beta-2-like 1 protein	http://www.genome.jp/dbget-bin/www_bget?ko:K14753	O42249	1078	2.4e-116	Guanine nucleotide-binding protein subunit beta-2-like 1 OS=Oreochromis niloticus GN=gnb2l1 PE=2 SV=1	PF00400	WD domain, G-beta repeat	GO:0016310	phosphorylation	GO:0016301//GO:0005515	kinase activity//protein binding	--	--	KOG0279	G protein beta subunit-like protein
Cluster-342212.29555	1198	551606226	XP_005784477.1	490	3.5e-47	hypothetical protein EMIHUDRAFT_449489 [Emiliania huxleyi CCMP1516]>gi|485637562|gb|EOD32048.1| hypothetical protein EMIHUDRAFT_449489 [Emiliania huxleyi CCMP1516]	--	--	--	--	--	--	--	--	--	Q58A42	379	3.7e-35	Protein DD3-3 OS=Dictyostelium discoideum GN=DD3-3 PE=2 SV=1	--	--	--	--	--	--	--	--	--	--
Cluster-342212.143046	2113	551552118	XP_005763454.1	141	1.8e-06	hypothetical protein EMIHUDRAFT_120434 [Emiliania huxleyi CCMP1516]>gi|485612837|gb|EOD11025.1| hypothetical protein EMIHUDRAFT_120434 [Emiliania huxleyi CCMP1516]	--	--	--	--	--	--	--	--	--	P25576	158	2.7e-09	Nicotinamide mononucleotide adenylyltransferase OS=Saccharomyces cerevisiae (strain ATCC 204508 / S288c) GN=POF1 PE=1 SV=1	PF01467//PF05053//PF10471	Cytidylyltransferase-like//Menin//Anaphase-promoting complex APC subunit CDC26	GO:0009058//GO:0031145//GO:0030071	biosynthetic process//anaphase-promoting complex-dependent proteasomal ubiquitin-dependent protein catabolic process//regulation of mitotic metaphase/anaphase transition	GO:0003824	catalytic activity	GO:0005680//GO:0005634	anaphase-promoting complex//nucleus	--	--
Cluster-342212.81959	807	--	--	--	--	--	--	--	--	--	--	--	--	--	--	P51638	277	1.7e-23	Caveolin-3 OS=Rattus norvegicus GN=Cav3 PE=1 SV=1	PF01146	Caveolin	GO:0070836	caveola assembly	--	--	--	--	--	--
Cluster-342212.120594	585	551555811	XP_005765065.1	228	4.1e-17	hypothetical protein EMIHUDRAFT_416466 [Emiliania huxleyi CCMP1516]>gi|551570736|ref|XP_005771289.1| hypothetical protein EMIHUDRAFT_427386 [Emiliania huxleyi CCMP1516]>gi|485614931|gb|EOD12636.1| hypothetical protein EMIHUDRAFT_416466 [Emiliania huxleyi CCMP1516]>gi|485622497|gb|EOD18860.1| hypothetical protein EMIHUDRAFT_427386 [Emiliania huxleyi CCMP1516]	327239397	HQ318067.1	54	2.79659e-17	Ailuropoda melanoleuca ribosomal protein L22 (Rpl22) gene, complete cds	K02891	RP-L22e, RPL22	large subunit ribosomal protein L22e	http://www.genome.jp/dbget-bin/www_bget?ko:K02891	P35268	231	2.6e-18	60S ribosomal protein L22 OS=Homo sapiens GN=RPL22 PE=1 SV=2	PF03368//PF04138//PF01776	Dicer dimerisation domain//GtrA-like protein//Ribosomal L22e protein family	GO:0051252//GO:0006412//GO:0042254//GO:0000271//GO:0006810	regulation of RNA metabolic process//translation//ribosome biogenesis//polysaccharide biosynthetic process//transport	GO:0016891//GO:0003735	endoribonuclease activity, producing 5'-phosphomonoesters//structural constituent of ribosome	GO:0005840//GO:0016021//GO:0005622	ribosome//integral component of membrane//intracellular	KOG3434	60S ribosomal protein L22
Cluster-342212.102482	664	760439255	XP_011396696.1	269	8.1e-22	60S ribosomal protein L18-3 [Auxenochlorella protothecoides]>gi|675351378|gb|KFM23818.1| 60S ribosomal protein L18-3 [Auxenochlorella protothecoides]	--	--	--	--	--	K02883	RP-L18e, RPL18	large subunit ribosomal protein L18e	http://www.genome.jp/dbget-bin/www_bget?ko:K02883	Q5UAS1	269	1.2e-22	60S ribosomal protein L18 OS=Bombyx mori GN=RpL18 PE=2 SV=1	--	--	--	--	--	--	--	--	KOG1714	60s ribosomal protein L18
Cluster-342212.180392	3428	326498665	BAK02318.1	789	2.1e-81	predicted protein [Hordeum vulgare subsp. vulgare]	--	--	--	--	--	K14815	MRT4	mRNA turnover protein 4	http://www.genome.jp/dbget-bin/www_bget?ko:K14815	Q9P778	986	4.3e-105	Dipeptidyl-peptidase 5 OS=Schizosaccharomyces pombe (strain 972 / ATCC 24843) GN=SPBC1711.12 PE=3 SV=1	PF01165//PF00466//PF00326//PF05090	Ribosomal protein S21//Ribosomal protein L10//Prolyl oligopeptidase family//Vitamin K-dependent gamma-carboxylase	GO:0042254//GO:0006508//GO:0017187//GO:0006412	ribosome biogenesis//proteolysis//peptidyl-glutamic acid carboxylation//translation	GO:0003735//GO:0008488//GO:0008236	structural constituent of ribosome//gamma-glutamyl carboxylase activity//serine-type peptidase activity	GO:0005622//GO:0005840	intracellular//ribosome	KOG0816	Protein involved in mRNA turnover
Cluster-342212.150052	1612	551663758	XP_005834643.1	1528	2e-167	hypothetical protein GUITHDRAFT_159541 [Guillardia theta CCMP2712]>gi|428178789|gb|EKX47663.1| hypothetical protein GUITHDRAFT_159541 [Guillardia theta CCMP2712]	768951972	XM_003975754.2	268	8.73432e-136	PREDICTED: Takifugu rubripes eukaryotic translation initiation factor 4A2 (eif4a2), mRNA	K03257	EIF4A	translation initiation factor 4A	http://www.genome.jp/dbget-bin/www_bget?ko:K03257	Q02748	1583	1.2e-174	Eukaryotic initiation factor 4A OS=Drosophila melanogaster GN=eIF-4a PE=1 SV=3	PF13545//PF00270//PF00579//PF07652//PF00176//PF04851//PF00165//PF07776	Crp-like helix-turn-helix domain//DEAD/DEAH box helicase//tRNA synthetases class I (W and Y)//Flavivirus DEAD domain//SNF2 family N-terminal domain//Type III restriction enzyme, res subunit//Bacterial regulatory helix-turn-helix proteins, AraC family//Zinc-finger associated domain (zf-AD)	GO:0019079//GO:0006355//GO:0006418	viral genome replication//regulation of transcription, DNA-templated//tRNA aminoacylation for protein translation	GO:0003677//GO:0005524//GO:0003676//GO:0003700//GO:0008026//GO:0016787//GO:0008270//GO:0004812//GO:0043565//GO:0000166	DNA binding//ATP binding//nucleic acid binding//transcription factor activity, sequence-specific DNA binding//ATP-dependent helicase activity//hydrolase activity//zinc ion binding//aminoacyl-tRNA ligase activity//sequence-specific DNA binding//nucleotide binding	GO:0005667//GO:0005634	transcription factor complex//nucleus	KOG0327	Translation initiation factor 4F, helicase subunit (eIF-4A) and related helicases
Cluster-198407.8	2252	823262399	XP_012463948.1	1934	2.4e-214	PREDICTED: pyrophosphate-energized vacuolar membrane proton pump-like [Gossypium raimondii]>gi|763816377|gb|KJB83229.1| hypothetical protein B456_013G236400 [Gossypium raimondii]	242093701	XM_002437296.1	98	3.90519e-41	Sorghum bicolor hypothetical protein, mRNA	K01507	ppa	inorganic pyrophosphatase	http://www.genome.jp/dbget-bin/www_bget?ko:K01507	P31414	1890	4.2e-210	Pyrophosphate-energized vacuolar membrane proton pump 1 OS=Arabidopsis thaliana GN=AVP1 PE=1 SV=1	PF04277//PF11057//PF03030	Oxaloacetate decarboxylase, gamma chain//Cortexin of kidney//Inorganic H+ pyrophosphatase	GO:0006560//GO:0006525//GO:0006814//GO:0006090//GO:0006119//GO:0015992//GO:0071436	proline metabolic process//arginine metabolic process//sodium ion transport//pyruvate metabolic process//oxidative phosphorylation//proton transport//sodium ion export	GO:0009678//GO:0008948//GO:0015081//GO:0004427	hydrogen-translocating pyrophosphatase activity//oxaloacetate decarboxylase activity//sodium ion transmembrane transporter activity//inorganic diphosphatase activity	GO:0031224//GO:0016020	intrinsic component of membrane//membrane	--	--
Cluster-181052.0	559	675192977	XP_008905373.1	421	1.6e-39	V-type proton ATPase proteolipid subunit [Phytophthora parasitica INRA-310]>gi|675192979|ref|XP_008905374.1| V-type proton ATPase proteolipid subunit, variant [Phytophthora parasitica INRA-310]>gi|675192985|ref|XP_008905377.1| V-type proton ATPase proteolipid subunit [Phytophthora parasitica INRA-310]>gi|695406604|ref|XP_009524153.1| hypothetical protein PHYSODRAFT_285608 [Phytophthora sojae]>gi|…	--	--	--	--	--	K02155	ATPeV0C, ATP6L	V-type H+-transporting ATPase 16kDa proteolipid subunit	http://www.genome.jp/dbget-bin/www_bget?ko:K02155	O24011	404	2.1e-38	V-type proton ATPase 16 kDa proteolipid subunit OS=Solanum lycopersicum PE=2 SV=1	PF00137	ATP synthase subunit C	GO:0015991//GO:0015992//GO:0006811	ATP hydrolysis coupled proton transport//proton transport//ion transport	GO:0015078	hydrogen ion transmembrane transporter activity	GO:0044425//GO:0033177	membrane part//proton-transporting two-sector ATPase complex, proton-transporting domain	KOG0232	Vacuolar H+-ATPase V0 sector, subunits c/c'
Cluster-342212.123418	789	669151914	XP_008611519.1	188	2.4e-12	hypothetical protein SDRG_07463 [Saprolegnia diclina VS20]>gi|530736993|gb|EQC35235.1| hypothetical protein SDRG_07463 [Saprolegnia diclina VS20]	--	--	--	--	--	K08515	VAMP7	vesicle-associated membrane protein 7	http://www.genome.jp/dbget-bin/www_bget?ko:K08515	Q86AQ7	201	1e-14	Vesicle-associated membrane protein 7B OS=Dictyostelium discoideum GN=vamp7B PE=3 SV=1	--	--	--	--	--	--	--	--	--	--
Cluster-342212.23707	2123	--	--	--	--	--	--	--	--	--	--	--	--	--	--	--	--	--	--	PF05808	Podoplanin	--	--	--	--	GO:0016021	integral component of membrane	--	--
Cluster-342212.91402	907	674229256	KFK23041.1	184	8e-12	hypothetical protein AALP_AAs67754U000100, partial [Arabis alpina]	--	--	--	--	--	--	--	--	--	P15870	193	1e-13	Histone H1-delta OS=Strongylocentrotus purpuratus PE=3 SV=1	PF00538	linker histone H1 and H5 family	GO:0006334	nucleosome assembly	GO:0003677	DNA binding	GO:0005634//GO:0000786	nucleus//nucleosome	--	--
Cluster-322943.1	1897	545710169	XP_005707393.1	652	9e-66	aldo/keto reductase [Galdieria sulphuraria]>gi|452823866|gb|EME30873.1| aldo/keto reductase [Galdieria sulphuraria]	627806144	XM_007678230.1	35	3.44638e-06	Baudoinia panamericana UAMH 10762 hypothetical protein partial mRNA	--	--	--	--	Q01752	1216	5.1e-132	Aryl-alcohol dehydrogenase [NADP(+)] OS=Phanerochaete chrysosporium PE=1 SV=1	--	--	--	--	--	--	--	--	KOG1575	Voltage-gated shaker-like K+ channel, subunit beta/KCNAB
Cluster-342212.94264	1468	326521326	BAJ96866.1	299	6e-25	predicted protein [Hordeum vulgare subsp. vulgare]	--	--	--	--	--	--	--	--	--	--	--	--	--	PF00010	Helix-loop-helix DNA-binding domain	--	--	GO:0046983	protein dimerization activity	--	--	--	--
Cluster-342212.94265	1207	--	--	--	--	--	--	--	--	--	--	--	--	--	--	--	--	--	--	--	--	--	--	--	--	--	--	--	--
Cluster-342212.192108	2113	813192979	XP_012208344.1	168	1.3e-09	hypothetical protein SPRG_14046 [Saprolegnia parasitica CBS 223.65]>gi|641526601|gb|KDO20954.1| hypothetical protein SPRG_14046 [Saprolegnia parasitica CBS 223.65]	--	--	--	--	--	--	--	--	--	P90901	741	6.8e-77	Intermediate filament protein ifa-1 OS=Caenorhabditis elegans GN=ifa-1 PE=1 SV=2	PF00038	Intermediate filament protein	--	--	GO:0005198	structural molecule activity	GO:0005882	intermediate filament	KOG0977	Nuclear envelope protein lamin, intermediate filament superfamily
Cluster-342212.52409	1096	544215353	XP_005537822.1	877	4.2e-92	cytochrome c reductase cytochrome c1 subunit [Cyanidioschyzon merolae strain 10D]>gi|449018384|dbj|BAM81786.1| cytochrome c reductase cytochrome c1 subunit [Cyanidioschyzon merolae strain 10D]	169849946	XM_001831620.1	424	0	Coprinopsis cinerea okayama7#130 # hypothetical protein, mRNA	K00413	CYC1, CYT1, petC	ubiquinol-cytochrome c reductase cytochrome c1 subunit	http://www.genome.jp/dbget-bin/www_bget?ko:K00413	P07143	938	5.1e-100	Cytochrome c1, heme protein, mitochondrial OS=Saccharomyces cerevisiae (strain ATCC 204508 / S288c) GN=CYT1 PE=1 SV=1	PF00034//PF13442//PF02167	Cytochrome c//Cytochrome C oxidase, cbb3-type, subunit III//Cytochrome C1 family	GO:0006118	obsolete electron transport	GO:0009055//GO:0020037	electron carrier activity//heme binding	--	--	KOG3052	Cytochrome c1
Cluster-342212.116045	557	302780091	XP_002971820.1	196	2e-13	hypothetical protein SELMODRAFT_172404 [Selaginella moellendorffii]>gi|302781134|ref|XP_002972341.1| hypothetical protein SELMODRAFT_172858 [Selaginella moellendorffii]>gi|300159808|gb|EFJ26427.1| hypothetical protein SELMODRAFT_172858 [Selaginella moellendorffii]>gi|300160119|gb|EFJ26737.1| hypothetical protein SELMODRAFT_172404 [Selaginella moellendorffii]	262401431	FJ774898.1	42	1.24378e-10	Scylla paramamosain 40S ribosomal protein S25 mRNA, partial cds	K02975	RP-S25e, RPS25	small subunit ribosomal protein S25e	http://www.genome.jp/dbget-bin/www_bget?ko:K02975	Q8ISN9	197	2.2e-14	40S ribosomal protein S25 OS=Branchiostoma belcheri GN=RPS25 PE=2 SV=1	PF00376	MerR family regulatory protein	GO:0006355	regulation of transcription, DNA-templated	GO:0003677	DNA binding	--	--	KOG1767	40S ribosomal protein S25
Cluster-342212.167750	911	326502804	BAJ99030.1	526	1.8e-51	predicted protein [Hordeum vulgare subsp. vulgare]	--	--	--	--	--	K02873	RP-L13e, RPL13	large subunit ribosomal protein L13e	http://www.genome.jp/dbget-bin/www_bget?ko:K02873	Q962U1	477	1.2e-46	60S ribosomal protein L13 OS=Spodoptera frugiperda GN=RpL13 PE=2 SV=1	PF13724//PF01294	DNA-binding domain//Ribosomal protein L13e	GO:0042254//GO:0006412	ribosome biogenesis//translation	GO:0003677//GO:0003735	DNA binding//structural constituent of ribosome	GO:0005622//GO:0005840	intracellular//ribosome	KOG3295	60S Ribosomal protein L13
Cluster-206963.0	1289	--	--	--	--	--	--	--	--	--	--	--	--	--	--	--	--	--	--	PF00564//PF06584//PF05656	PB1 domain//DIRP//Protein of unknown function (DUF805)	GO:0006351//GO:0007049	transcription, DNA-templated//cell cycle	GO:0005515	protein binding	GO:0016021//GO:0017053	integral component of membrane//transcriptional repressor complex	--	--
Cluster-342212.23755	660	--	--	--	--	--	--	--	--	--	--	--	--	--	--	--	--	--	--	--	--	--	--	--	--	--	--	--	--
Cluster-342212.139935	610	326529211	BAK00999.1	1033	1.9e-110	predicted protein [Hordeum vulgare subsp. vulgare]>gi|326530362|dbj|BAJ97607.1| predicted protein [Hordeum vulgare subsp. vulgare]	33946348	AY294153.1	426	0	Platyamoeba placida actin mRNA, partial cds	K10355	ACTF	actin, other eukaryote	http://www.genome.jp/dbget-bin/www_bget?ko:K10355	P02576	1037	9.3e-112	Actin, plasmodial isoform OS=Physarum polycephalum GN=ARDA PE=1 SV=2	--	--	--	--	GO:0005524	ATP binding	GO:0005737//GO:0005856	cytoplasm//cytoskeleton	KOG0676	Actin and related proteins
Cluster-342212.221427	2944	255572830	XP_002527347.1	1405	6.8e-153	Oligopeptide transporter, putative [Ricinus communis]>gi|223533266|gb|EEF35019.1| Oligopeptide transporter, putative [Ricinus communis]	628826442	XM_007765335.1	37	4.15958e-07	Coniophora puteana RWD-64-598 SS2 OPT oligopeptide transporter mRNA	--	--	--	--	O14031	1637	1.2e-180	Glutathione transporter 1 OS=Schizosaccharomyces pombe (strain 972 / ATCC 24843) GN=pgt1 PE=1 SV=1	PF03169//PF07732	OPT oligopeptide transporter protein//Multicopper oxidase	GO:0055085	transmembrane transport	GO:0005507	copper ion binding	--	--	KOG2262	Sexual differentiation process protein ISP4
Cluster-342212.188755	1361	302843621	XP_002953352.1	217	1.8e-15	hypothetical protein VOLCADRAFT_105865 [Volvox carteri f. nagariensis]>gi|300261449|gb|EFJ45662.1| hypothetical protein VOLCADRAFT_105865 [Volvox carteri f. nagariensis]	--	--	--	--	--	--	--	--	--	Q27294	242	3.2e-19	RNA-binding protein cabeza OS=Drosophila melanogaster GN=caz PE=2 SV=2	PF00076//PF00280	RNA recognition motif. (a.k.a. RRM, RBD, or RNP domain)//Potato inhibitor I family	GO:0009611	response to wounding	GO:0004867//GO:0003676	serine-type endopeptidase inhibitor activity//nucleic acid binding	--	--	KOG1995	Conserved Zn-finger protein
Cluster-342212.106800	364	--	--	--	--	--	--	--	--	--	--	--	--	--	--	--	--	--	--	--	--	--	--	--	--	--	--	--	--
Cluster-342212.136866	1177	326526633	BAK00705.1	469	9.3e-45	predicted protein [Hordeum vulgare subsp. vulgare]	6942230	AF221523.1	52	7.49552e-16	Acanthamoeba healyi subtilisin-like serine proteinase (SUB) mRNA, complete cds	--	--	--	--	P08594	535	2.9e-53	Aqualysin-1 OS=Thermus aquaticus GN=pstI PE=1 SV=2	PF00082	Subtilase family	GO:0006508	proteolysis	GO:0004252	serine-type endopeptidase activity	--	--	KOG1153	Subtilisin-related protease/Vacuolar protease B
Cluster-191857.0	1587	--	--	--	--	--	--	--	--	--	--	--	--	--	--	--	--	--	--	PF13851//PF06156//PF07851//PF04111//PF07544//PF03896	Growth-arrest specific micro-tubule binding//Protein of unknown function (DUF972)//TMPIT-like protein//Autophagy protein Apg6//RNA polymerase II transcription mediator complex subunit 9//Translocon-associated protein (TRAP), alpha subunit	GO:0006357//GO:0048870//GO:0006260//GO:0006914	regulation of transcription from RNA polymerase II promoter//cell motility//DNA replication//autophagy	GO:0001104	RNA polymerase II transcription cofactor activity	GO:0005789//GO:0016592//GO:0016021//GO:0031514	endoplasmic reticulum membrane//mediator complex//integral component of membrane//motile cilium	--	--
Cluster-342212.196172	257	551646214	XP_005825894.1	179	8.5e-12	hypothetical protein GUITHDRAFT_154593 [Guillardia theta CCMP2712]>gi|551657000|ref|XP_005831272.1| hypothetical protein GUITHDRAFT_153014 [Guillardia theta CCMP2712]>gi|551661399|ref|XP_005833466.1| hypothetical protein GUITHDRAFT_152371 [Guillardia theta CCMP2712]>gi|551661423|ref|XP_005833478.1| hypothetical protein GUITHDRAFT_152379 [Guillardia theta CCMP2712]>gi|551661425|ref|XP_005833479.1|…	551646213	XM_005825837.1	130	6.42233e-60	Guillardia theta CCMP2712 hypothetical protein (GUITHDRAFT_154593) mRNA, complete cds	--	--	--	--	--	--	--	--	--	--	--	--	--	--	--	--	--	--
Cluster-342212.161425	269	--	--	--	--	--	--	--	--	--	--	--	--	--	--	--	--	--	--	--	--	--	--	--	--	--	--	--	--
Cluster-342212.24840	1497	301106653	XP_002902409.1	1285	2.8e-139	medium-chain specific acyl-CoA dehydrogenase, mitochondrial precursor [Phytophthora infestans T30-4]>gi|262098283|gb|EEY56335.1| medium-chain specific acyl-CoA dehydrogenase, mitochondrial precursor [Phytophthora infestans T30-4]	909551052	XM_013282760.1	82	2.01918e-32	PREDICTED: Papilio polytes probable medium-chain specific acyl-CoA dehydrogenase, mitochondrial (LOC106103084), transcript variant X2, mRNA	--	--	--	--	P08503	1474	4.9e-162	Medium-chain specific acyl-CoA dehydrogenase, mitochondrial OS=Rattus norvegicus GN=Acadm PE=1 SV=1	PF00441//PF02770//PF02771	Acyl-CoA dehydrogenase, C-terminal domain//Acyl-CoA dehydrogenase, middle domain//Acyl-CoA dehydrogenase, N-terminal domain	GO:0006118//GO:0008152//GO:0055114	obsolete electron transport//metabolic process//oxidation-reduction process	GO:0050660//GO:0003995//GO:0016627	flavin adenine dinucleotide binding//acyl-CoA dehydrogenase activity//oxidoreductase activity, acting on the CH-CH group of donors	--	--	KOG0140	Medium-chain acyl-CoA dehydrogenase
Cluster-342212.22526	3807	669152006	XP_008611565.1	380	6.3e-34	hypothetical protein SDRG_07506 [Saprolegnia diclina VS20]>gi|530737039|gb|EQC35281.1| hypothetical protein SDRG_07506 [Saprolegnia diclina VS20]	636602864	XM_008034376.1	73	5.2435e-27	Trametes versicolor FP-101664 SS1 CRAL/TRIO domain-containing protein partial mRNA	--	--	--	--	Q9UU99	580	5.7e-58	CRAL-TRIO domain-containing protein C23B6.04c OS=Schizosaccharomyces pombe (strain 972 / ATCC 24843) GN=SPCC23B6.04c PE=1 SV=1	--	--	--	--	--	--	--	--	KOG1470	Phosphatidylinositol transfer protein PDR16 and related proteins
Cluster-342212.22525	3748	761967016	KIY98592.1	383	2.8e-34	hypothetical protein MNEG_9370 [Monoraphidium neglectum]	636602864	XM_008034376.1	73	5.16146e-27	Trametes versicolor FP-101664 SS1 CRAL/TRIO domain-containing protein partial mRNA	--	--	--	--	Q9UU99	580	5.6e-58	CRAL-TRIO domain-containing protein C23B6.04c OS=Schizosaccharomyces pombe (strain 972 / ATCC 24843) GN=SPCC23B6.04c PE=1 SV=1	--	--	--	--	--	--	--	--	KOG1470	Phosphatidylinositol transfer protein PDR16 and related proteins
Cluster-190840.0	552	551668141	XP_005836830.1	431	1.1e-40	large subunit ribosomal protein L27e, cytoplasmic [Guillardia theta CCMP2712]>gi|428180985|gb|EKX49850.1| large subunit ribosomal protein L27e, cytoplasmic [Guillardia theta CCMP2712]	--	--	--	--	--	K02901	RP-L27e, RPL27	large subunit ribosomal protein L27e	http://www.genome.jp/dbget-bin/www_bget?ko:K02901	Q02984	366	5.4e-34	60S ribosomal protein L27 OS=Pyrobotrys stellata GN=RPL27 PE=2 SV=1	PF01777	Ribosomal L27e protein family	GO:0042254//GO:0006412	ribosome biogenesis//translation	GO:0003735	structural constituent of ribosome	GO:0005840//GO:0005622	ribosome//intracellular	KOG3418	60S ribosomal protein L27
Cluster-140411.0	1702	669142470	XP_008606797.1	412	5.5e-38	hypothetical protein SDRG_02963 [Saprolegnia diclina VS20]>gi|530741283|gb|EQC39525.1| hypothetical protein SDRG_02963 [Saprolegnia diclina VS20]	--	--	--	--	--	--	--	--	--	Q9ZW95	381	3e-35	Cytokinin hydroxylase OS=Arabidopsis thaliana GN=CYP735A2 PE=1 SV=1	PF00067	Cytochrome P450	GO:0055114	oxidation-reduction process	GO:0016705//GO:0020037//GO:0005506	oxidoreductase activity, acting on paired donors, with incorporation or reduction of molecular oxygen//heme binding//iron ion binding	--	--	KOG0157	Cytochrome P450 CYP4/CYP19/CYP26 subfamilies
Cluster-342212.189895	3042	326532784	BAJ89237.1	2003	3.2e-222	predicted protein [Hordeum vulgare subsp. vulgare]	313759947	GU574490.1	540	0	Brachionus ibericus Hsp90 beta mRNA, complete cds	K04079	htpG, HSP90A	molecular chaperone HtpG	http://www.genome.jp/dbget-bin/www_bget?ko:K04079	Q22235	2102	1.5e-234	Endoplasmin homolog OS=Caenorhabditis elegans GN=enpl-1 PE=3 SV=1	PF00183//PF06213	Hsp90 protein//Cobalamin biosynthesis protein CobT	GO:0006950//GO:0006457//GO:0009236	response to stress//protein folding//cobalamin biosynthetic process	GO:0051082//GO:0005524	unfolded protein binding//ATP binding	--	--	KOG0020	Endoplasmic reticulum glucose-regulated protein (GRP94/endoplasmin), HSP90 family
Cluster-342212.137532	649	672180062	XP_008810211.1	729	3.6e-75	PREDICTED: 60S ribosomal protein L18-2-like [Phoenix dactylifera]	336260164	XM_003344831.1	94	1.81332e-39	Sordaria macrospora k-hell 60S ribosomal protein L18, partial mRNA	K02883	RP-L18e, RPL18	large subunit ribosomal protein L18e	http://www.genome.jp/dbget-bin/www_bget?ko:K02883	Q940B0	693	7.7e-72	60S ribosomal protein L18-3 OS=Arabidopsis thaliana GN=RPL18C PE=2 SV=1	PF05739	SNARE domain	--	--	GO:0005515	protein binding	--	--	KOG1714	60s ribosomal protein L18
Cluster-291850.1	803	--	--	--	--	--	--	--	--	--	--	--	--	--	--	--	--	--	--	PF04879//PF03854	Molybdopterin oxidoreductase Fe4S4 domain//P-11 zinc finger	GO:0055114	oxidation-reduction process	GO:0003723//GO:0016491//GO:0008270	RNA binding//oxidoreductase activity//zinc ion binding	--	--	--	--
Cluster-342212.53723	1289	551670843	XP_005838179.1	625	8.3e-63	hypothetical protein GUITHDRAFT_151008 [Guillardia theta CCMP2712]>gi|428182338|gb|EKX51199.1| hypothetical protein GUITHDRAFT_151008 [Guillardia theta CCMP2712]	--	--	--	--	--	--	--	--	--	Q03529	832	1.2e-87	Ceramide very long chain fatty acid hydroxylase SCS7 OS=Saccharomyces cerevisiae (strain ATCC 204508 / S288c) GN=SCS7 PE=1 SV=1	PF04116	Fatty acid hydroxylase superfamily	GO:0006633//GO:0055114	fatty acid biosynthetic process//oxidation-reduction process	GO:0005506//GO:0016491	iron ion binding//oxidoreductase activity	--	--	KOG0539	Sphingolipid fatty acid hydroxylase
Cluster-321346.0	721	673017856	XP_008862889.1	349	4.7e-31	hypothetical protein H310_01543 [Aphanomyces invadans]>gi|574482092|gb|ETW09084.1| hypothetical protein H310_01543 [Aphanomyces invadans]	--	--	--	--	--	K03094	SKP1, CBF3D	S-phase kinase-associated protein 1	http://www.genome.jp/dbget-bin/www_bget?ko:K03094	B6QGB9	315	5.8e-28	E3 ubiquitin ligase complex SCF subunit sconC OS=Talaromyces marneffei (strain ATCC 18224 / CBS 334.59 / QM 7333) GN=sconC PE=3 SV=1	PF01466//PF00651//PF03931	Skp1 family, dimerisation domain//BTB/POZ domain//Skp1 family, tetramerisation domain	GO:0006511	ubiquitin-dependent protein catabolic process	GO:0005515	protein binding	--	--	KOG1724	SCF ubiquitin ligase, Skp1 component
Cluster-342212.104104	447	260516654	ACX43954.1	339	4.2e-30	cysteine protease 1 [Brachiaria hybrid cultivar]>gi|260516656|gb|ACX43955.1| cysteine protease 1 [Brachiaria hybrid cultivar]>gi|260516658|gb|ACX43956.1| cysteine protease 1 [Brachiaria hybrid cultivar]>gi|260516660|gb|ACX43957.1| cysteine protease 1 [Brachiaria hybrid cultivar]>gi|260516662|gb|ACX43958.1| cysteine protease 2 [Brachiaria hybrid cultivar]>gi|260516664|gb|ACX43959.1| cysteine prote…	--	--	--	--	--	K01373	CTSF	cathepsin F	http://www.genome.jp/dbget-bin/www_bget?ko:K01373	P25779	388	1.2e-36	Cruzipain OS=Trypanosoma cruzi PE=1 SV=1	PF00112//PF03051	Papain family cysteine protease//Peptidase C1-like family	GO:0006508	proteolysis	GO:0008234//GO:0004197	cysteine-type peptidase activity//cysteine-type endopeptidase activity	--	--	KOG1543	Cysteine proteinase Cathepsin L
Cluster-367018.3	1867	--	--	--	--	--	--	--	--	--	--	--	--	--	--	--	--	--	--	PF01363//PF13180//PF04850//PF00595//PF02176	FYVE zinc finger//PDZ domain//Baculovirus E66 occlusion-derived virus envelope protein//PDZ domain (Also known as DHR or GLGF)//TRAF-type zinc finger	--	--	GO:0046872//GO:0005515//GO:0008270	metal ion binding//protein binding//zinc ion binding	GO:0019031	viral envelope	--	--
Cluster-342212.147597	436	604856260	AHV84766.1	389	6.4e-36	histone 4, partial [Codiaeum variegatum]	630351032	XM_007866626.1	198	1.82708e-97	Gloeophyllum trabeum ATCC 11539 histone-fold-containing protein partial mRNA	--	--	--	--	P62790	355	8e-33	Histone H4 OS=Sterkiella nova PE=3 SV=2	PF02291//PF00125//PF02969	Transcription initiation factor IID, 31kD subunit//Core histone H2A/H2B/H3/H4//TATA box binding protein associated factor (TAF)	GO:0006352	DNA-templated transcription, initiation	GO:0003677	DNA binding	GO:0005634	nucleus	--	--
Cluster-342212.119178	539	694325358	XP_009353625.1	292	1.4e-24	PREDICTED: 60S ribosomal protein L37-3-like [Pyrus x bretschneideri]	--	--	--	--	--	K02922	RP-L37e, RPL37	large subunit ribosomal protein L37e	http://www.genome.jp/dbget-bin/www_bget?ko:K02922	Q9C0T1	292	2e-25	60S ribosomal protein L37 OS=Emericella nidulans (strain FGSC A4 / ATCC 38163 / CBS 112.46 / NRRL 194 / M139) GN=rpl37 PE=3 SV=1	PF01907//PF09297	Ribosomal protein L37e//NADH pyrophosphatase zinc ribbon domain	GO:0006412//GO:0042254	translation//ribosome biogenesis	GO:0046872//GO:0003735//GO:0016787	metal ion binding//structural constituent of ribosome//hydrolase activity	GO:0005622//GO:0005840	intracellular//ribosome	KOG3475	60S ribosomal protein L37
Cluster-342212.102800	1240	761970678	KIZ01415.1	380	2e-34	hypothetical protein MNEG_6544 [Monoraphidium neglectum]	--	--	--	--	--	--	--	--	--	C5P3X6	502	2.1e-49	Extracellular metalloprotease 1 OS=Coccidioides posadasii (strain C735) GN=MEP1 PE=1 SV=1	PF02031//PF02165	Streptomyces extracellular neutral proteinase (M7) family//Wilm's tumour protein	GO:0006355//GO:0006508	regulation of transcription, DNA-templated//proteolysis	GO:0004222//GO:0008270	metalloendopeptidase activity//zinc ion binding	GO:0005634//GO:0005576	nucleus//extracellular region	--	--
Cluster-342212.48750	532	301117182	XP_002906319.1	333	2.5e-29	60S ribosomal protein L27 [Phytophthora infestans T30-4]>gi|262107668|gb|EEY65720.1| 60S ribosomal protein L27 [Phytophthora infestans T30-4]	--	--	--	--	--	K02901	RP-L27e, RPL27	large subunit ribosomal protein L27e	http://www.genome.jp/dbget-bin/www_bget?ko:K02901	O74538	317	2.5e-28	60S ribosomal protein L27-B OS=Schizosaccharomyces pombe (strain 972 / ATCC 24843) GN=rpl2702 PE=3 SV=1	PF01777	Ribosomal L27e protein family	GO:0042254//GO:0006412	ribosome biogenesis//translation	GO:0003735	structural constituent of ribosome	GO:0005840//GO:0005622	ribosome//intracellular	KOG3418	60S ribosomal protein L27
Cluster-342212.236735	1608	460370555	XP_004231118.1	340	1.2e-29	PREDICTED: polygalacturonase-like [Solanum lycopersicum]	--	--	--	--	--	--	--	--	--	Q0CXI3	647	4.1e-66	Probable exopolygalacturonase C OS=Aspergillus terreus (strain NIH 2624 / FGSC A1156) GN=pgxC PE=3 SV=1	PF00295	Glycosyl hydrolases family 28	GO:0005982//GO:0005985//GO:0005975	starch metabolic process//sucrose metabolic process//carbohydrate metabolic process	GO:0004650	polygalacturonase activity	--	--	--	--
Cluster-342212.161414	1238	--	--	--	--	--	--	--	--	--	--	--	--	--	--	--	--	--	--	--	--	--	--	--	--	--	--	--	--
Cluster-342212.80265	1082	302799926	XP_002981721.1	260	1.5e-20	hypothetical protein SELMODRAFT_421246 [Selaginella moellendorffii]>gi|300150553|gb|EFJ17203.1| hypothetical protein SELMODRAFT_421246 [Selaginella moellendorffii]	--	--	--	--	--	--	--	--	--	A1L2H9	343	4.9e-31	Replication protein A 32 kDa subunit-B OS=Xenopus laevis GN=rpa2-b PE=2 SV=1	--	--	--	--	--	--	--	--	KOG3108	Single-stranded DNA-binding replication protein A (RPA), medium (30 kD) subunit
Cluster-300155.0	1375	546315991	XP_005716019.1	1025	3.7e-109	4-hydroxyphenylpyruvate dioxygenase, 4HPPD [Chondrus crispus]>gi|507112524|emb|CDF36200.1| 4-hydroxyphenylpyruvate dioxygenase, 4HPPD [Chondrus crispus]	116641912	CT837250.1	1209	0	Oryza sativa (indica cultivar-group) cDNA clone:OSIGCRA117I11, full insert sequence	K00457	HPD, hppD	4-hydroxyphenylpyruvate dioxygenase	http://www.genome.jp/dbget-bin/www_bget?ko:K00457	Q6TGZ5	1281	1.1e-139	4-hydroxyphenylpyruvate dioxygenase OS=Danio rerio GN=hpd PE=2 SV=1	--	--	--	--	--	--	--	--	KOG0638	4-hydroxyphenylpyruvate dioxygenase
Cluster-342212.14300	2929	731356983	XP_010689967.1	925	3.1e-97	PREDICTED: protein argonaute 5 [Beta vulgaris subsp. vulgaris]>gi|870849551|gb|KMT01791.1| hypothetical protein BVRB_9g210730 [Beta vulgaris subsp. vulgaris]	--	--	--	--	--	--	--	--	--	Q9QZ81	948	9.4e-101	Protein argonaute-2 OS=Rattus norvegicus GN=Ago2 PE=2 SV=2	PF02171	Piwi domain	--	--	GO:0003676	nucleic acid binding	--	--	KOG1041	Translation initiation factor 2C (eIF-2C) and related proteins
Cluster-342212.25760	3519	586672008	XP_006837302.1	1009	6.7e-107	PREDICTED: eukaryotic translation initiation factor 3 subunit A [Amborella trichopoda]>gi|548839920|gb|ERN00156.1| hypothetical protein AMTR_s00111p00041460 [Amborella trichopoda]	299738220	XM_001838133.2	837	0	Coprinopsis cinerea okayama7#130 ]# translation initiation factor eIF3a, mRNA	K03254	EIF3A	translation initiation factor 3 subunit A	http://www.genome.jp/dbget-bin/www_bget?ko:K03254	Q4P358	1615	5.1e-178	Eukaryotic translation initiation factor 3 subunit A OS=Ustilago maydis (strain 521 / FGSC 9021) GN=TIF32 PE=3 SV=2	PF01399	PCI domain	--	--	GO:0005515	protein binding	--	--	KOG2072	Translation initiation factor 3, subunit a (eIF-3a)
Cluster-342212.24747	1619	460416035	XP_004253357.1	300	5e-25	PREDICTED: LOW QUALITY PROTEIN: uncharacterized transporter C417.10-like [Solanum lycopersicum]	--	--	--	--	--	--	--	--	--	Q9US44	586	4.9e-59	Uncharacterized transporter C1002.16c OS=Schizosaccharomyces pombe (strain 972 / ATCC 24843) GN=SPAC1002.16c PE=3 SV=1	PF07690	Major Facilitator Superfamily	GO:0055085	transmembrane transport	--	--	GO:0016021	integral component of membrane	--	--
Cluster-342212.30300	1286	813175950	XP_012205011.1	541	4.5e-53	hypothetical protein SPRG_09871 [Saprolegnia parasitica CBS 223.65]>gi|641530093|gb|KDO24235.1| hypothetical protein SPRG_09871 [Saprolegnia parasitica CBS 223.65]	695577122	XM_009554224.1	231	2.56355e-115	Heterobasidion irregulare TC 32-1 mitochondrial carrier protein partial mRNA	K15104	SLC25A11, OGC	solute carrier family 25 (mitochondrial oxoglutarate transporter), member 11	http://www.genome.jp/dbget-bin/www_bget?ko:K15104	Q6FTN2	528	2.1e-52	Mitochondrial dicarboxylate transporter OS=Candida glabrata (strain ATCC 2001 / CBS 138 / JCM 3761 / NBRC 0622 / NRRL Y-65) GN=DIC1 PE=3 SV=1	--	--	--	--	--	--	--	--	KOG0759	Mitochondrial oxoglutarate/malate carrier proteins
Cluster-342212.25361	600	475622287	EMT31824.1	406	9.5e-38	Histone H4 [Aegilops tauschii]	156230804	BC152397.1	169	3.38958e-81	Mus musculus histone cluster 1, H4m, mRNA (cDNA clone MGC:171137 IMAGE:40099768), complete cds	--	--	--	--	P62790	361	2.2e-33	Histone H4 OS=Sterkiella nova PE=3 SV=2	PF02291//PF02969//PF00125	Transcription initiation factor IID, 31kD subunit//TATA box binding protein associated factor (TAF)//Core histone H2A/H2B/H3/H4	GO:0006352	DNA-templated transcription, initiation	GO:0003677	DNA binding	GO:0005634	nucleus	--	--
Cluster-342212.93408	1515	--	--	--	--	--	--	--	--	--	--	--	--	--	--	--	--	--	--	--	--	--	--	--	--	--	--	--	--
Cluster-342212.135123	1275	--	--	--	--	--	--	--	--	--	--	--	--	--	--	D4B5F9	338	2.2e-30	Probable peptidoglycan-N-acetylglucosamine deacetylase ARB_03699 OS=Arthroderma benhamiae (strain ATCC MYA-4681 / CBS 112371) GN=ARB_03699 PE=1 SV=2	PF01522	Polysaccharide deacetylase	GO:0005975//GO:0006807	carbohydrate metabolic process//nitrogen compound metabolic process	GO:0016810	hydrolase activity, acting on carbon-nitrogen (but not peptide) bonds	--	--	--	--
Cluster-292955.0	2444	551679256	XP_005842380.1	1035	4.5e-110	hypothetical protein GUITHDRAFT_57670, partial [Guillardia theta CCMP2712]>gi|428186550|gb|EKX55400.1| hypothetical protein GUITHDRAFT_57670, partial [Guillardia theta CCMP2712]	--	--	--	--	--	K16911	DDX21	ATP-dependent RNA helicase DDX21	http://www.genome.jp/dbget-bin/www_bget?ko:K16911	Q3B8Q1	1360	1.3e-148	Nucleolar RNA helicase 2 OS=Rattus norvegicus GN=Ddx21 PE=2 SV=1	PF00270//PF07517//PF08152//PF04851	DEAD/DEAH box helicase//SecA DEAD-like domain//GUCT (NUC152) domain//Type III restriction enzyme, res subunit	GO:0017038	protein import	GO:0016787//GO:0003723//GO:0003677//GO:0005524//GO:0004386//GO:0003676	hydrolase activity//RNA binding//DNA binding//ATP binding//helicase activity//nucleic acid binding	GO:0016020//GO:0005634	membrane//nucleus	KOG0331	ATP-dependent RNA helicase
Cluster-342212.45239	626	242043060	XP_002459401.1	554	6.9e-55	hypothetical protein SORBIDRAFT_02g004110 [Sorghum bicolor]>gi|241922778|gb|EER95922.1| hypothetical protein SORBIDRAFT_02g004110 [Sorghum bicolor]	299751836	XM_002911648.1	333	2.41298e-172	Coprinopsis cinerea okayama7#130 40S ribosomal protein S18, partial mRNA	K02964	RP-S18e, RPS18	small subunit ribosomal protein S18e	http://www.genome.jp/dbget-bin/www_bget?ko:K02964	P0CX55	574	4.7e-58	40S ribosomal protein S18-A OS=Saccharomyces cerevisiae (strain ATCC 204508 / S288c) GN=RPS18A PE=1 SV=1	PF00416	Ribosomal protein S13/S18	GO:0042254//GO:0006412	ribosome biogenesis//translation	GO:0003723//GO:0003735	RNA binding//structural constituent of ribosome	GO:0005886//GO:0005730//GO:0005622//GO:0005618//GO:0022627//GO:0005840//GO:0005773	plasma membrane//nucleolus//intracellular//cell wall//cytosolic small ribosomal subunit//ribosome//vacuole	KOG3311	Ribosomal protein S18
Cluster-265322.0	1549	694453367	XP_009351420.1	451	1.5e-42	PREDICTED: uncharacterized protein LOC103942945, partial [Pyrus x bretschneideri]	--	--	--	--	--	--	--	--	--	--	--	--	--	PF11909	NADH-quinone oxidoreductase cyanobacterial subunit N	GO:0006118//GO:0055114	obsolete electron transport//oxidation-reduction process	GO:0016655	oxidoreductase activity, acting on NAD(P)H, quinone or similar compound as acceptor	GO:0016020	membrane	--	--
Cluster-342212.125450	3339	514808188	XP_004978937.1	456	8.5e-43	PREDICTED: protein ZINC INDUCED FACILITATOR-LIKE 1-like [Setaria italica]	--	--	--	--	--	--	--	--	--	G3XMC9	435	3.3e-41	Efflux pump azaL OS=Aspergillus niger (strain ATCC 1015 / CBS 113.46 / FGSC A1144 / LSHB Ac4 / NCTC 3858a / NRRL 328 / USDA 3528.7) GN=azaL PE=2 SV=1	PF00083//PF07690	Sugar (and other) transporter//Major Facilitator Superfamily	GO:0055085	transmembrane transport	GO:0022857	transmembrane transporter activity	GO:0016021	integral component of membrane	KOG2615	Permease of the major facilitator superfamily
Cluster-342212.127351	849	--	--	--	--	--	--	--	--	--	--	--	--	--	--	--	--	--	--	--	--	--	--	--	--	--	--	--	--
Cluster-342212.47654	731	--	--	--	--	--	--	--	--	--	--	--	--	--	--	--	--	--	--	--	--	--	--	--	--	--	--	--	--
Cluster-342212.24319	727	552810877	XP_005843317.1	374	5.9e-34	ribosomal protein L19 [Chlorella variabilis]>gi|307102950|gb|EFN51215.1| ribosomal protein L19 [Chlorella variabilis]	--	--	--	--	--	K02885	RP-L19e, RPL19	large subunit ribosomal protein L19e	http://www.genome.jp/dbget-bin/www_bget?ko:K02885	P49693	345	1.9e-31	60S ribosomal protein L19-3 OS=Arabidopsis thaliana GN=RPL19C PE=2 SV=3	PF01280//PF06459	Ribosomal protein L19e//Ryanodine Receptor TM 4-6	GO:0006412//GO:0006874//GO:0042254//GO:0006816	translation//cellular calcium ion homeostasis//ribosome biogenesis//calcium ion transport	GO:0003735//GO:0005219	structural constituent of ribosome//ryanodine-sensitive calcium-release channel activity	GO:0005840//GO:0016021//GO:0005622	ribosome//integral component of membrane//intracellular	KOG1696	60s ribosomal protein L19
Cluster-342212.160425	1236	--	--	--	--	--	--	--	--	--	--	--	--	--	--	--	--	--	--	PF03547//PF13851//PF16716//PF03462//PF02601//PF00435//PF01496//PF04111//PF02315//PF11744//PF16326//PF06009	Membrane transport protein//Growth-arrest specific micro-tubule binding//Bone marrow stromal antigen 2//PCRF domain//Exonuclease VII, large subunit//Spectrin repeat//V-type ATPase 116kDa subunit family//Autophagy protein Apg6//Methanol dehydrogenase beta subunit//Aluminium activated malate transporter//ABC transporter C-terminal domain//Laminin Domain II	GO:0015991//GO:0048870//GO:0055085//GO:0015743//GO:0015946//GO:0006308//GO:0051607//GO:0055114//GO:0015992//GO:0007155//GO:0006449//GO:0006914//GO:0006415	ATP hydrolysis coupled proton transport//cell motility//transmembrane transport//malate transport//methanol oxidation//DNA catabolic process//defense response to virus//oxidation-reduction process//proton transport//cell adhesion//regulation of translational termination//autophagy//translational termination	GO:0005515//GO:0008855//GO:0003677//GO:0016149//GO:0004022//GO:0015078	protein binding//exodeoxyribonuclease VII activity//DNA binding//translation release factor activity, codon specific//alcohol dehydrogenase (NAD) activity//hydrogen ion transmembrane transporter activity	GO:0016021//GO:0009318//GO:0005737//GO:0005840//GO:0018444//GO:0031514//GO:0033179	integral component of membrane//exodeoxyribonuclease VII complex//cytoplasm//ribosome//translation release factor complex//motile cilium//proton-transporting V-type ATPase, V0 domain	--	--
Cluster-342212.24080	492	50843988	AAT84169.1	437	2e-41	60S ribosomal protein L27 [Chara globularis]	--	--	--	--	--	K02901	RP-L27e, RPL27	large subunit ribosomal protein L27e	http://www.genome.jp/dbget-bin/www_bget?ko:K02901	Q7ZV82	450	8.7e-44	60S ribosomal protein L27 OS=Danio rerio GN=rpl27 PE=2 SV=3	PF01777	Ribosomal L27e protein family	GO:0006412//GO:0042254	translation//ribosome biogenesis	GO:0003735	structural constituent of ribosome	GO:0005622//GO:0005840	intracellular//ribosome	KOG3418	60S ribosomal protein L27
Cluster-374824.1	601	--	--	--	--	--	--	--	--	--	--	--	--	--	--	--	--	--	--	PF01899//PF00335	Na+/H+ ion antiporter subunit//Tetraspanin family	GO:0006812	cation transport	GO:0008324	cation transmembrane transporter activity	GO:0016021	integral component of membrane	--	--
Cluster-342212.47385	381	--	--	--	--	--	--	--	--	--	--	--	--	--	--	--	--	--	--	PF00137	ATP synthase subunit C	GO:0015991//GO:0015992	ATP hydrolysis coupled proton transport//proton transport	GO:0015078	hydrogen ion transmembrane transporter activity	GO:0033177	proton-transporting two-sector ATPase complex, proton-transporting domain	--	--
Cluster-313434.0	2073	224012735	XP_002295020.1	763	1.3e-78	Hypothetical protein THAPSDRAFT_30659 [Thalassiosira pseudonana CCMP1335]>gi|220969459|gb|EED87800.1| Hypothetical protein THAPSDRAFT_30659 [Thalassiosira pseudonana CCMP1335]	--	--	--	--	--	--	--	--	--	Q8UAA9	752	3.5e-78	Beta-lactamase hydrolase-like protein OS=Agrobacterium fabrum (strain C58 / ATCC 33970) GN=blh PE=2 SV=1	PF04273//PF01726//PF12300	Putative phosphatase (DUF442)//LexA DNA binding domain//Protein of unknown function (DUF3628)	GO:0006508	proteolysis	GO:0016787//GO:0016817//GO:0004252	hydrolase activity//hydrolase activity, acting on acid anhydrides//serine-type endopeptidase activity	--	--	KOG0814	Glyoxylase
Cluster-342212.124159	807	317134909	ADV03017.1	634	4.7e-64	ribosomal protein S3a [Karlodinium veneficum]	--	--	--	--	--	K02984	RP-S3Ae, RPS3A	small subunit ribosomal protein S3Ae	http://www.genome.jp/dbget-bin/www_bget?ko:K02984	A7S3J7	619	3.6e-63	40S ribosomal protein S3a OS=Nematostella vectensis GN=v1g242621 PE=3 SV=1	PF01015//PF04083	Ribosomal S3Ae family//Partial alpha/beta-hydrolase lipase region	GO:0042254//GO:0006629//GO:0006412	ribosome biogenesis//lipid metabolic process//translation	GO:0003735	structural constituent of ribosome	GO:0005840//GO:0005622	ribosome//intracellular	KOG1628	40S ribosomal protein S3A
Cluster-184888.2	1670	6468695	CAB61630.1	357	1.3e-31	putative protein phosphatase [Rubus idaeus]	--	--	--	--	--	K12795	SUGT1, SGT1	suppressor of G2 allele of SKP1	http://www.genome.jp/dbget-bin/www_bget?ko:K12795	Q9SUT5	333	1.1e-29	Protein SGT1 homolog B OS=Arabidopsis thaliana GN=SGT1B PE=1 SV=1	PF13417//PF02798//PF00818//PF13409	Glutathione S-transferase, N-terminal domain//Glutathione S-transferase, N-terminal domain//Ice nucleation protein repeat//Glutathione S-transferase, N-terminal domain	--	--	GO:0005515	protein binding	GO:0009279	cell outer membrane	KOG1309	Suppressor of G2 allele of skp1
Cluster-342212.49522	2245	326534000	BAJ93773.1	2156	4.3e-240	predicted protein [Hordeum vulgare subsp. vulgare]	695556243	XM_009548799.1	676	0	Heterobasidion irregulare TC 32-1 hypothetical protein mRNA	K01610	E4.1.1.49, pckA	phosphoenolpyruvate carboxykinase (ATP)	http://www.genome.jp/dbget-bin/www_bget?ko:K01610	Q6FRR0	1866	2.6e-207	Phosphoenolpyruvate carboxykinase (ATP) OS=Candida glabrata (strain ATCC 2001 / CBS 138 / JCM 3761 / NBRC 0622 / NRRL Y-65) GN=PCK1 PE=3 SV=1	PF01293//PF14659	Phosphoenolpyruvate carboxykinase//Phage integrase, N-terminal SAM-like domain	GO:0015976//GO:0006094//GO:0015074//GO:0006099	carbon utilization//gluconeogenesis//DNA integration//tricarboxylic acid cycle	GO:0004612//GO:0005524//GO:0003677	phosphoenolpyruvate carboxykinase (ATP) activity//ATP binding//DNA binding	--	--	--	--
Cluster-344509.0	1747	--	--	--	--	--	--	--	--	--	--	--	--	--	--	--	--	--	--	--	--	--	--	--	--	--	--	--	--
Cluster-216969.0	2050	302813349	XP_002988360.1	150	1.6e-07	hypothetical protein SELMODRAFT_128052 [Selaginella moellendorffii]>gi|300143762|gb|EFJ10450.1| hypothetical protein SELMODRAFT_128052 [Selaginella moellendorffii]	--	--	--	--	--	--	--	--	--	V5NDL4	191	4e-13	Pyranose dehydrogenase OS=Agaricus campestris GN=pdh1 PE=1 SV=1	PF05199//PF00732	GMC oxidoreductase//GMC oxidoreductase	GO:0055114	oxidation-reduction process	GO:0050660//GO:0016614	flavin adenine dinucleotide binding//oxidoreductase activity, acting on CH-OH group of donors	--	--	--	--
Cluster-284978.0	1028	514821234	XP_004985298.1	236	8.4e-18	PREDICTED: mitochondrial outer membrane protein porin 5 [Setaria italica]	--	--	--	--	--	--	--	--	--	Q84P97	212	7.3e-16	Mitochondrial outer membrane protein porin 5 OS=Oryza sativa subsp. japonica GN=VDAC5 PE=2 SV=1	PF01459	Eukaryotic porin	GO:0055085	transmembrane transport	--	--	GO:0005741	mitochondrial outer membrane	KOG3126	Porin/voltage-dependent anion-selective channel protein
Cluster-342212.29216	1620	302770667	XP_002968752.1	541	5.7e-53	hypothetical protein SELMODRAFT_145941 [Selaginella moellendorffii]>gi|300163257|gb|EFJ29868.1| hypothetical protein SELMODRAFT_145941 [Selaginella moellendorffii]	170096465	XM_001879418.1	224	2.52867e-111	Laccaria bicolor S238N-H82 hypothetical protein partial mRNA	K03262	EIF5	translation initiation factor 5	http://www.genome.jp/dbget-bin/www_bget?ko:K03262	Q09689	834	8.6e-88	Probable eukaryotic translation initiation factor 5 OS=Schizosaccharomyces pombe (strain 972 / ATCC 24843) GN=tif5 PE=3 SV=1	PF02020//PF01213//PF01873	eIF4-gamma/eIF5/eIF2-epsilon//Adenylate cyclase associated (CAP) N terminal//Domain found in IF2B/IF5	GO:0006413//GO:0006446//GO:0007010	translational initiation//regulation of translational initiation//cytoskeleton organization	GO:0005515//GO:0003779//GO:0003743	protein binding//actin binding//translation initiation factor activity	GO:0005840	ribosome	KOG2767	Translation initiation factor 5 (eIF-5)
Cluster-246165.0	1849	675179697	XP_008898733.1	591	1e-58	hypothetical protein PPTG_06546 [Phytophthora parasitica INRA-310]>gi|568101716|gb|ETN16402.1| hypothetical protein PPTG_06546 [Phytophthora parasitica INRA-310]	--	--	--	--	--	K01279	TPP1, CLN2	tripeptidyl-peptidase I	http://www.genome.jp/dbget-bin/www_bget?ko:K01279	Q8MZS4	1125	1.8e-121	Physarolisin OS=Physarum polycephalum PE=1 SV=1	PF06817//PF09286	Reverse transcriptase thumb domain//Pro-kumamolisin, activation domain	GO:0006278	RNA-dependent DNA replication	GO:0003964//GO:0008236	RNA-directed DNA polymerase activity//serine-type peptidase activity	--	--	--	--
Cluster-342212.97389	2045	18406	CAA78364.1	820	3.2e-85	cytoskeletal protein [Euglena gracilis]>gi|255354|gb|AAB23241.1| 86 kda articulin=major membrane skeletal protein [Euglena gracilis, Peptide, 650 aa]	--	--	--	--	--	--	--	--	--	--	--	--	--	--	--	--	--	--	--	--	--	--	--
Cluster-342212.164847	1006	302761516	XP_002964180.1	321	1.2e-27	hypothetical protein SELMODRAFT_142541 [Selaginella moellendorffii]>gi|300167909|gb|EFJ34513.1| hypothetical protein SELMODRAFT_142541 [Selaginella moellendorffii]	927417247	XM_014098980.1	69	2.26302e-25	Trichoderma virens Gv29-8 hypothetical protein mRNA	K03263	EIF5A	translation initiation factor 5A	http://www.genome.jp/dbget-bin/www_bget?ko:K03263	O94083	315	8.1e-28	Eukaryotic translation initiation factor 5A OS=Candida albicans (strain SC5314 / ATCC MYA-2876) GN=ANB1 PE=3 SV=2	PF01287	Eukaryotic elongation factor 5A hypusine, DNA-binding OB fold	GO:0006452//GO:0044249//GO:1901576//GO:0044267//GO:0045905//GO:0006448//GO:0045901	translational frameshifting//cellular biosynthetic process//organic substance biosynthetic process//cellular protein metabolic process//positive regulation of translational termination//regulation of translational elongation//positive regulation of translational elongation	GO:0003746//GO:0043022//GO:0003723	translation elongation factor activity//ribosome binding//RNA binding	GO:0005840	ribosome	KOG3271	Translation initiation factor 5A (eIF-5A)
Cluster-342212.103370	1240	11131946	Q9ZNY3.1	1211	8.9e-131	RecName: Full=Calreticulin; Flags: Precursor [Euglena gracilis]>gi|3970687|emb|CAA70945.1| calreticulin precursor [Euglena gracilis]	39725970	AY395251.1	69	2.80463e-25	Amblyomma rotundatum calreticulin gene, complete cds	K08057	CALR	calreticulin	http://www.genome.jp/dbget-bin/www_bget?ko:K08057	Q9ZNY3	1211	1.3e-131	Calreticulin OS=Euglena gracilis PE=2 SV=1	PF14721//PF00262	Apoptosis-inducing factor, mitochondrion-associated, C-term//Calreticulin family	GO:0006457	protein folding	GO:0005509//GO:0046983//GO:0051082	calcium ion binding//protein dimerization activity//unfolded protein binding	GO:0005783	endoplasmic reticulum	KOG0674	Calreticulin
Cluster-342212.31181	1056	--	--	--	--	--	--	--	--	--	--	--	--	--	--	--	--	--	--	PF14622	Ribonuclease-III-like	GO:0006396//GO:0051252	RNA processing//regulation of RNA metabolic process	GO:0003723//GO:0004525	RNA binding//ribonuclease III activity	--	--	--	--
Cluster-287901.0	2833	698782819	XP_009824453.1	213	1.1e-14	hypothetical protein H257_02483 [Aphanomyces astaci]>gi|574120503|gb|ETV85981.1| hypothetical protein H257_02483 [Aphanomyces astaci]	--	--	--	--	--	--	--	--	--	Q02817	137	1e-06	Mucin-2 OS=Homo sapiens GN=MUC2 PE=1 SV=2	--	--	--	--	--	--	--	--	--	--
Cluster-342212.86208	1308	159473354	XP_001694804.1	1073	9.4e-115	ribosomal protein L4, component of cytosolic 80S ribosome and 60S large subunit [Chlamydomonas reinhardtii]>gi|158276616|gb|EDP02388.1| ribosomal protein L4 [Chlamydomonas reinhardtii]	930405060	XM_014321328.1	232	7.25297e-116	Trichosporon asahii var. asahii CBS 2479 Ras2 partial mRNA >gi|921330226|dbj|AB920017.1| Trichosporon asahii gene for Ras2, complete sequence, strain: JCM 2466	K02930	RP-L4e, RPL4	large subunit ribosomal protein L4e	http://www.genome.jp/dbget-bin/www_bget?ko:K02930	Q9SF40	1046	1.8e-112	60S ribosomal protein L4-1 OS=Arabidopsis thaliana GN=RPL4A PE=1 SV=1	PF00573	Ribosomal protein L4/L1 family	GO:0006412//GO:0042254	translation//ribosome biogenesis	GO:0003735	structural constituent of ribosome	GO:0022626//GO:0005840//GO:0044446//GO:0043231//GO:0071944//GO:0016020	cytosolic ribosome//ribosome//intracellular organelle part//intracellular membrane-bounded organelle//cell periphery//membrane	KOG1475	Ribosomal protein RPL1/RPL2/RL4L4
Cluster-342212.138034	1693	148906184	ABR16248.1	543	3.5e-53	unknown [Picea sitchensis]>gi|224286786|gb|ACN41096.1| unknown [Picea sitchensis]	--	--	--	--	--	K02955	RP-S14e, RPS14	small subunit ribosomal protein S14e	http://www.genome.jp/dbget-bin/www_bget?ko:K02955	P19950	537	2.5e-53	40S ribosomal protein S14 OS=Zea mays PE=3 SV=1	PF00411//PF03404	Ribosomal protein S11//Mo-co oxidoreductase dimerisation domain	GO:0006412//GO:0055114//GO:0042254	translation//oxidation-reduction process//ribosome biogenesis	GO:0030151//GO:0003735//GO:0016491	molybdenum ion binding//structural constituent of ribosome//oxidoreductase activity	GO:0005840	ribosome	KOG0407	40S ribosomal protein S14
Cluster-298689.2	627	693497724	CEF99966.1	767	1.4e-79	Small GTPase superfamily, ARF/SAR type [Ostreococcus tauri]	982220866	XM_005541056.2	158	4.62648e-75	PREDICTED: Macaca fascicularis ADP ribosylation factor 1 (ARF1), transcript variant X2, mRNA	K07937	ARF1	ADP-ribosylation factor 1	http://www.genome.jp/dbget-bin/www_bget?ko:K07937	P36579	760	1.3e-79	ADP-ribosylation factor 1 OS=Schizosaccharomyces pombe (strain 972 / ATCC 24843) GN=arf1 PE=2 SV=2	PF00503//PF00071//PF01926//PF00025//PF08477//PF04670//PF01591	G-protein alpha subunit//Ras family//50S ribosome-binding GTPase//ADP-ribosylation factor family//Ras of Complex, Roc, domain of DAPkinase//Gtr1/RagA G protein conserved region//6-phosphofructo-2-kinase	GO:0006013//GO:0007165//GO:0006000//GO:0007264//GO:0007186	mannose metabolic process//signal transduction//fructose metabolic process//small GTPase mediated signal transduction//G-protein coupled receptor signaling pathway	GO:0004871//GO:0003873//GO:0003924//GO:0005524//GO:0031683//GO:0019001//GO:0005525	signal transducer activity//6-phosphofructo-2-kinase activity//GTPase activity//ATP binding//G-protein beta/gamma-subunit complex binding//guanyl nucleotide binding//GTP binding	--	--	KOG0070	GTP-binding ADP-ribosylation factor Arf1
Cluster-342212.120191	3328	--	--	--	--	--	695542926	XM_009545380.1	83	1.26373e-32	Heterobasidion irregulare TC 32-1 hypothetical protein partial mRNA	--	--	--	--	A0JMF8	278	5.2e-23	Transcription factor RFX3 OS=Danio rerio GN=rfx3 PE=2 SV=1	PF02257	RFX DNA-binding domain	GO:0006355	regulation of transcription, DNA-templated	GO:0003677	DNA binding	--	--	KOG3712	RFX family transcription factor
Cluster-244091.0	921	298712641	CBJ48666.1	215	2.1e-15	conserved unknown protein [Ectocarpus siliculosus]	--	--	--	--	--	--	--	--	--	--	--	--	--	--	--	--	--	--	--	--	--	--	--
Cluster-361898.1	951	--	--	--	--	--	--	--	--	--	--	--	--	--	--	D4ATM6	302	2.5e-26	Uncharacterized secreted protein ARB_07590 OS=Arthroderma benhamiae (strain ATCC MYA-4681 / CBS 112371) GN=ARB_07590 PE=1 SV=1	--	--	--	--	--	--	--	--	--	--
Cluster-342212.157608	2355	--	--	--	--	--	299753483	XM_001833251.2	272	7.67318e-138	Coprinopsis cinerea okayama7#130 KQ# glycoamidase, mRNA	--	--	--	--	--	--	--	--	PF02298	Plastocyanin-like domain	GO:0006118	obsolete electron transport	GO:0009055	electron carrier activity	--	--	--	--
Cluster-319694.1	652	--	--	--	--	--	--	--	--	--	--	--	--	--	--	--	--	--	--	--	--	--	--	--	--	--	--	--	--
Cluster-341200.0	1204	--	--	--	--	--	--	--	--	--	--	--	--	--	--	--	--	--	--	--	--	--	--	--	--	--	--	--	--
Cluster-342212.80904	993	--	--	--	--	--	--	--	--	--	--	--	--	--	--	--	--	--	--	--	--	--	--	--	--	--	--	--	--
Cluster-305639.0	1256	--	--	--	--	--	--	--	--	--	--	--	--	--	--	--	--	--	--	--	--	--	--	--	--	--	--	--	--
Cluster-342212.137609	1436	855303835	XP_012894877.1	1001	2.3e-106	uncharacterized protein [Blastocystis hominis]>gi|300175518|emb|CBK20829.2| unnamed protein product [Blastocystis hominis]	552831079	XM_005847987.1	141	3.08139e-65	Chlorella variabilis S-adenosyl-L-methionine synthetase (CHLNCDRAFT_145246) mRNA, complete cds	K00789	metK	S-adenosylmethionine synthetase	http://www.genome.jp/dbget-bin/www_bget?ko:K00789	P18298	1040	9.9e-112	S-adenosylmethionine synthase isoform type-2 OS=Rattus norvegicus GN=Mat2a PE=1 SV=1	PF05502//PF02772//PF02773//PF03081	Dynactin p62 family//S-adenosylmethionine synthetase, central domain//S-adenosylmethionine synthetase, C-terminal domain//Exo70 exocyst complex subunit	GO:0015948//GO:0006730//GO:0006887//GO:0006555//GO:0006556	methanogenesis//one-carbon metabolic process//exocytosis//methionine metabolic process//S-adenosylmethionine biosynthetic process	GO:0046872//GO:0004478//GO:0005524	metal ion binding//methionine adenosyltransferase activity//ATP binding	GO:0000145//GO:0005869	exocyst//dynactin complex	KOG1506	S-adenosylmethionine synthetase
Cluster-342212.141233	525	--	--	--	--	--	--	--	--	--	--	--	--	--	--	--	--	--	--	PF06236	Tyrosinase co-factor MelC1	GO:0042438	melanin biosynthetic process	GO:0005507	copper ion binding	--	--	--	--
[truncated: 254 more rows]
